# Supplementary material
Source: PubMed Central journal article supplement (PMC3390240)
Supplement: NIHMS386761-supplement-1_si_001.pdf [file NIHMS386761-supplement-1_si_001.pdf]

# Synthesis and Evaluation of Novologues as C-Terminal Hsp90 Inhibitors with Cytoprotective Activity against Sensory Neuron Glucotoxicity

Bhaskar Reddy Kusuma<sup>§</sup>, Liang Zhang<sup>#</sup>, Teather Sundstrom<sup>§</sup>, Laura B. Peterson<sup>§</sup>, Rick T.  
Dobrowsky<sup>#</sup> and Brian S. J. Blagg<sup>§\*</sup>

<sup>§</sup>Departments of Medicinal Chemistry and <sup>#</sup> Pharmacology and Toxicology

The University of Kansas, Lawrence, KS 66045

\* Correspondence should be addressed to: Brian S. J. Blagg, Department of Medicinal  
Chemistry, 4070 Malott Hall, 1251 Wescoe Hall Dr., The University of Kansas, Lawrence, KS  
66045, bblagg@ku.edu.

## List of Contents

|                                                                                                         |         |
|---------------------------------------------------------------------------------------------------------|---------|
| <sup>1</sup> H and <sup>13</sup> C NMR spectrums for all new compounds                                  | S2-S92  |
| HPLC analytical traces for compounds <b>13b</b> , <b>13f</b> , <b>13i</b> , <b>13h</b> , and <b>13n</b> | S93-S97 |

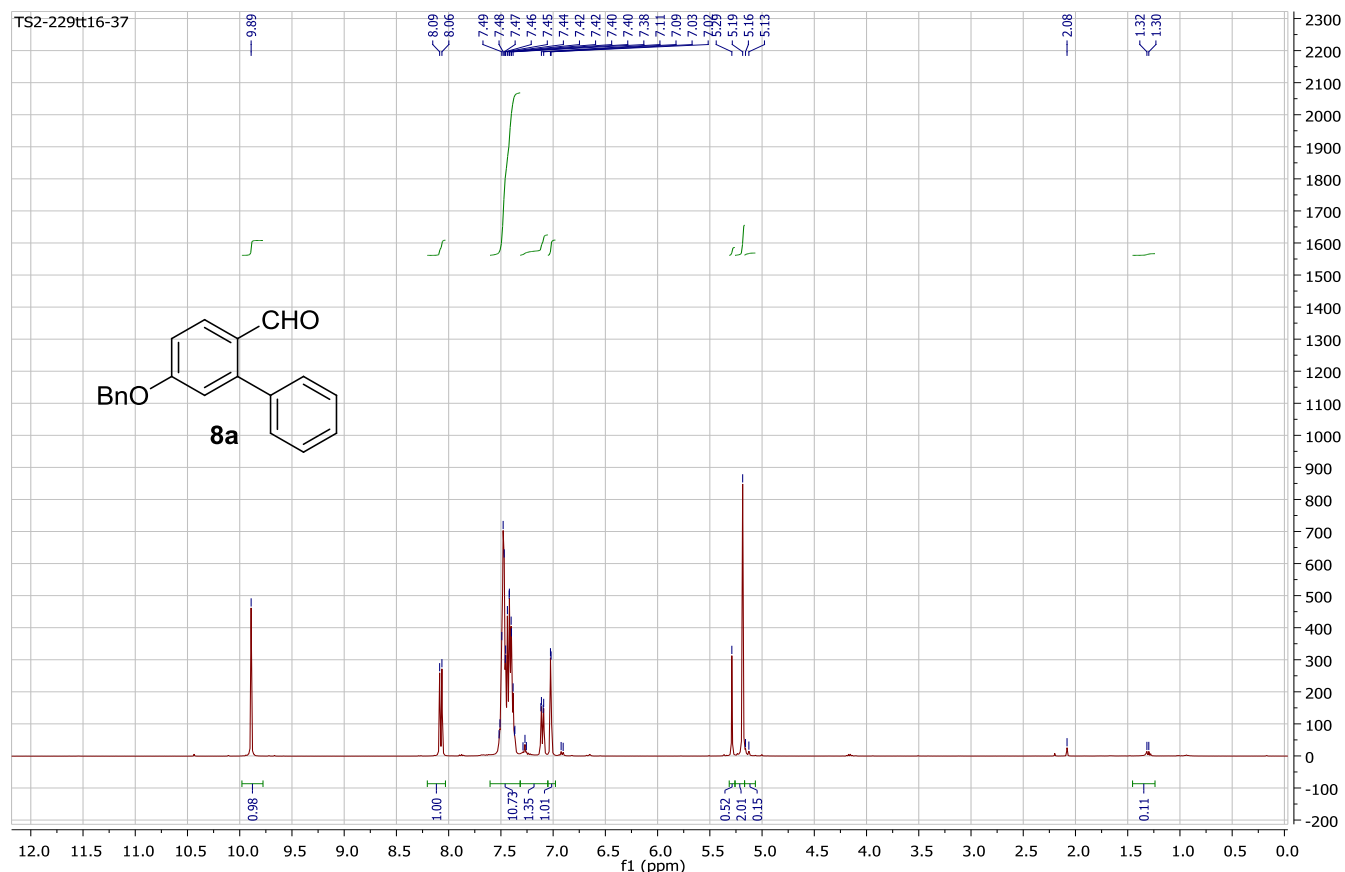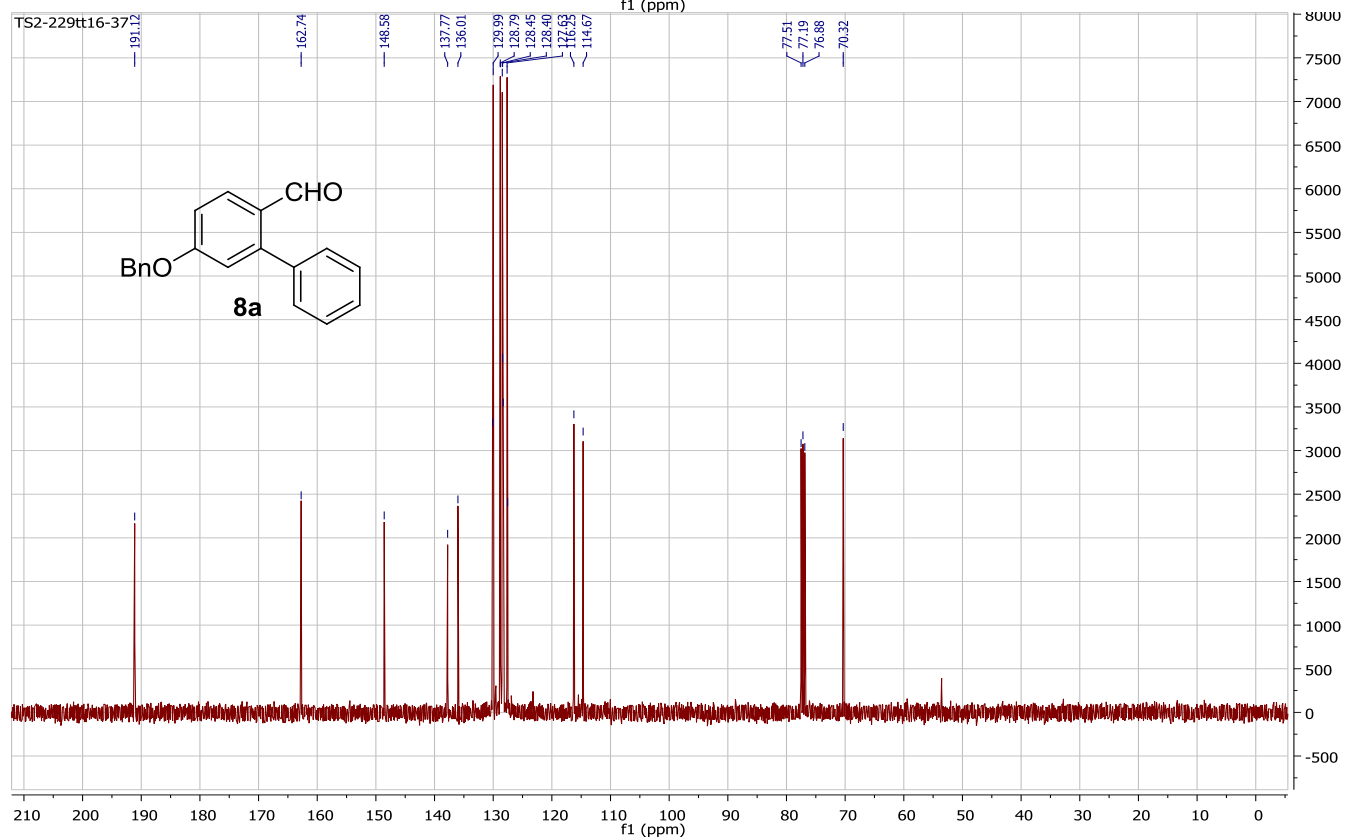

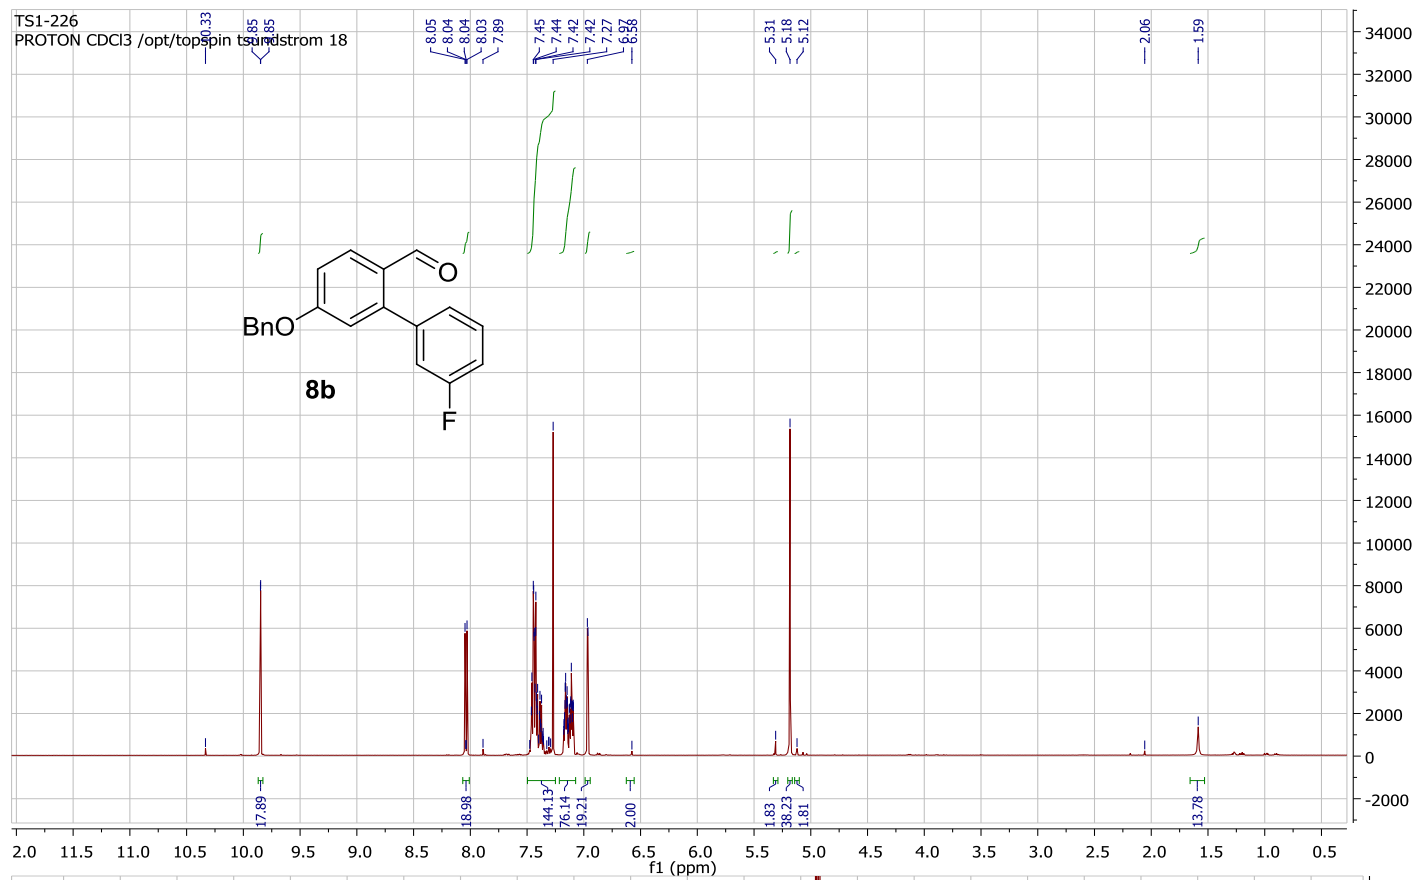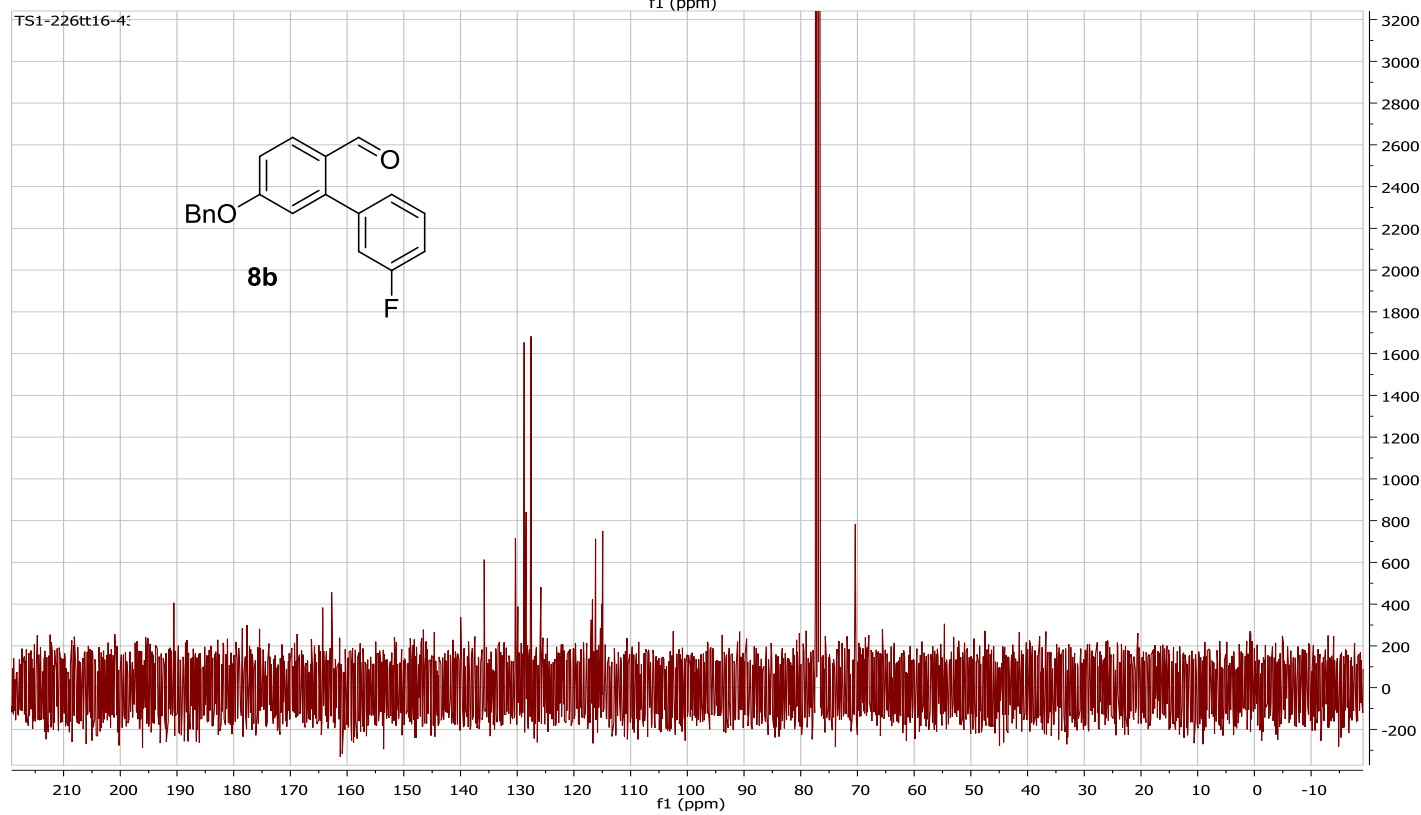

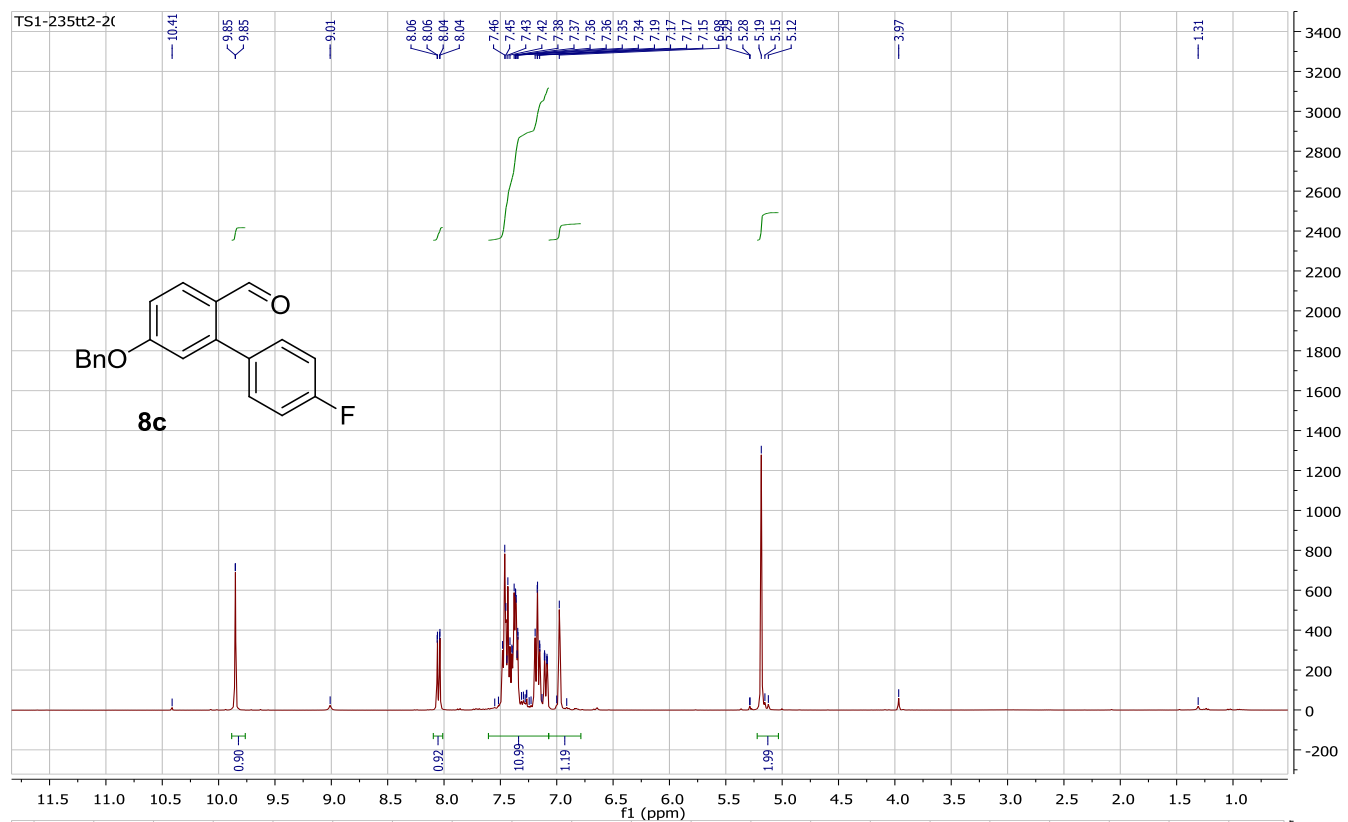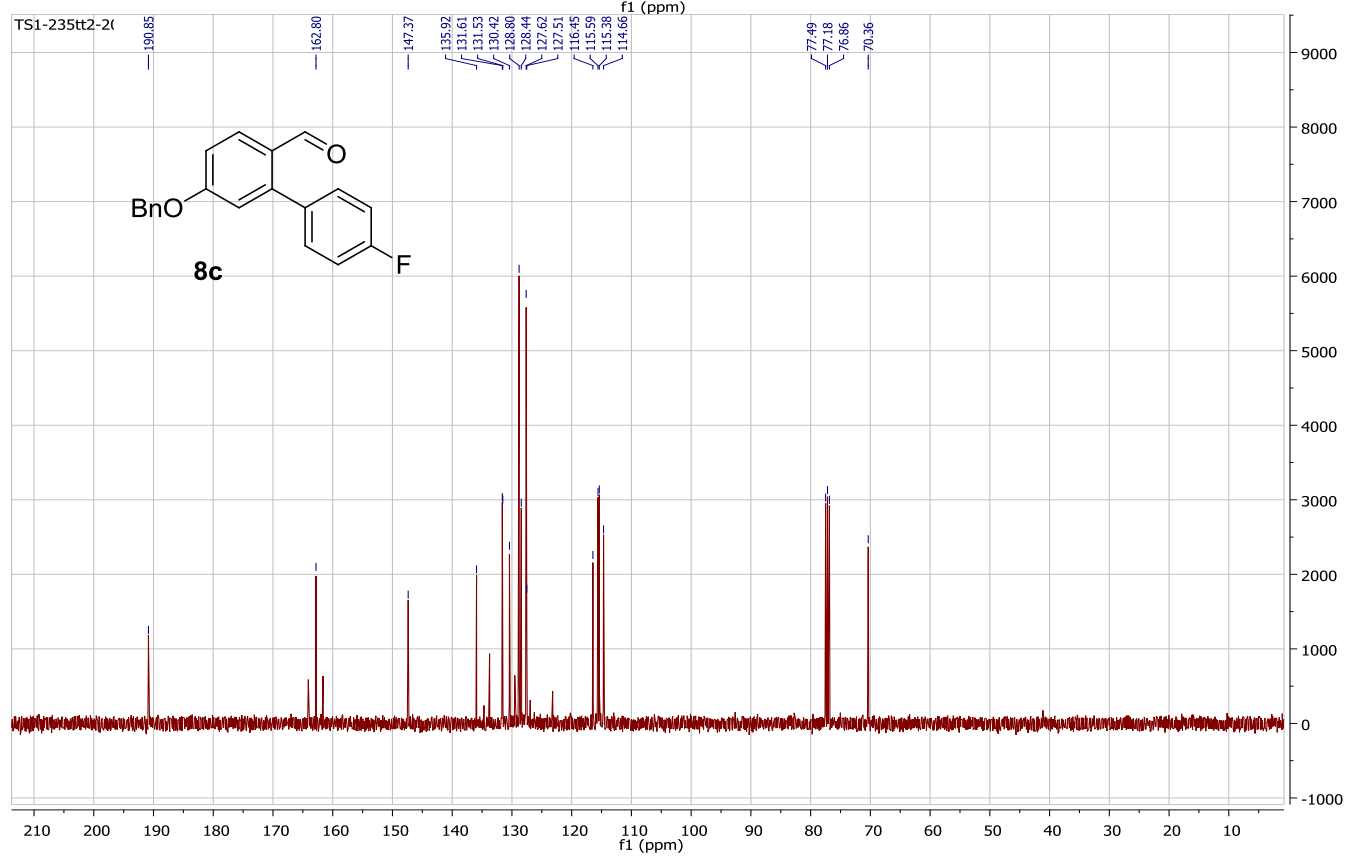



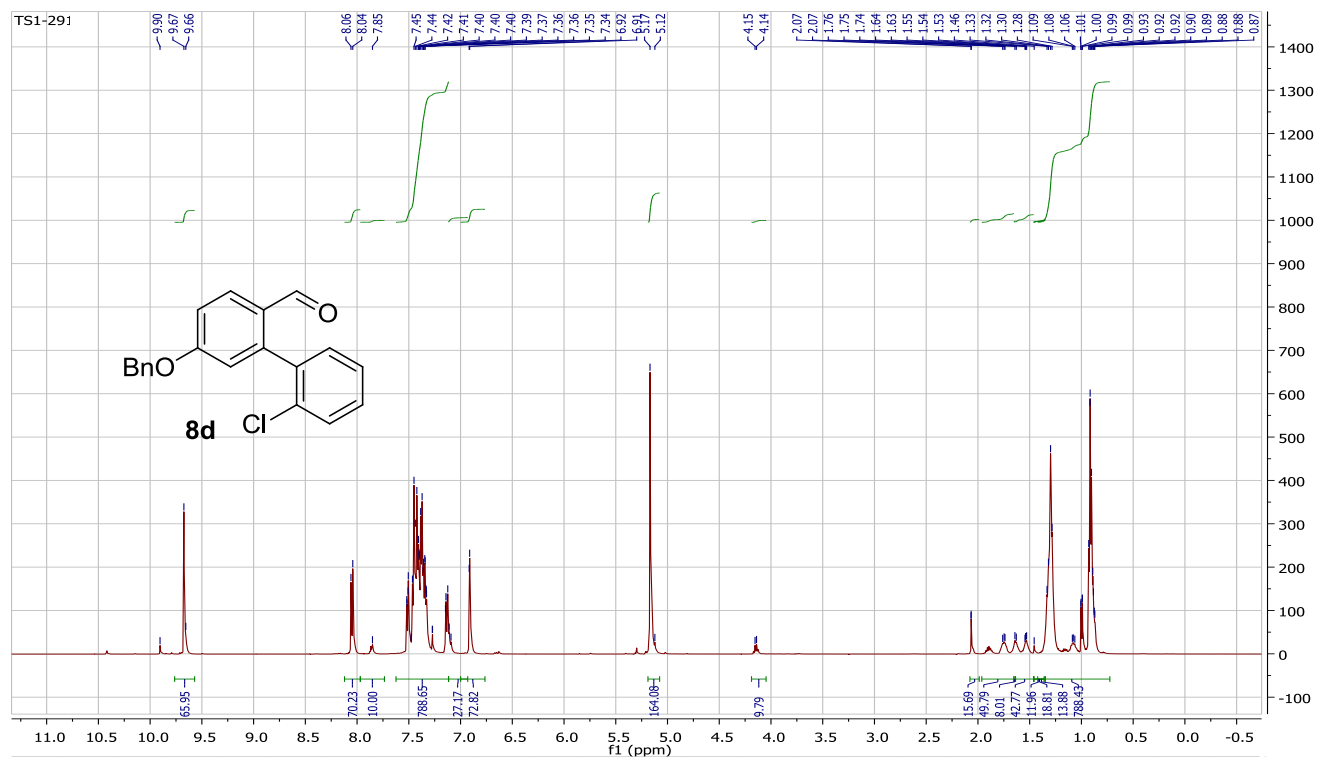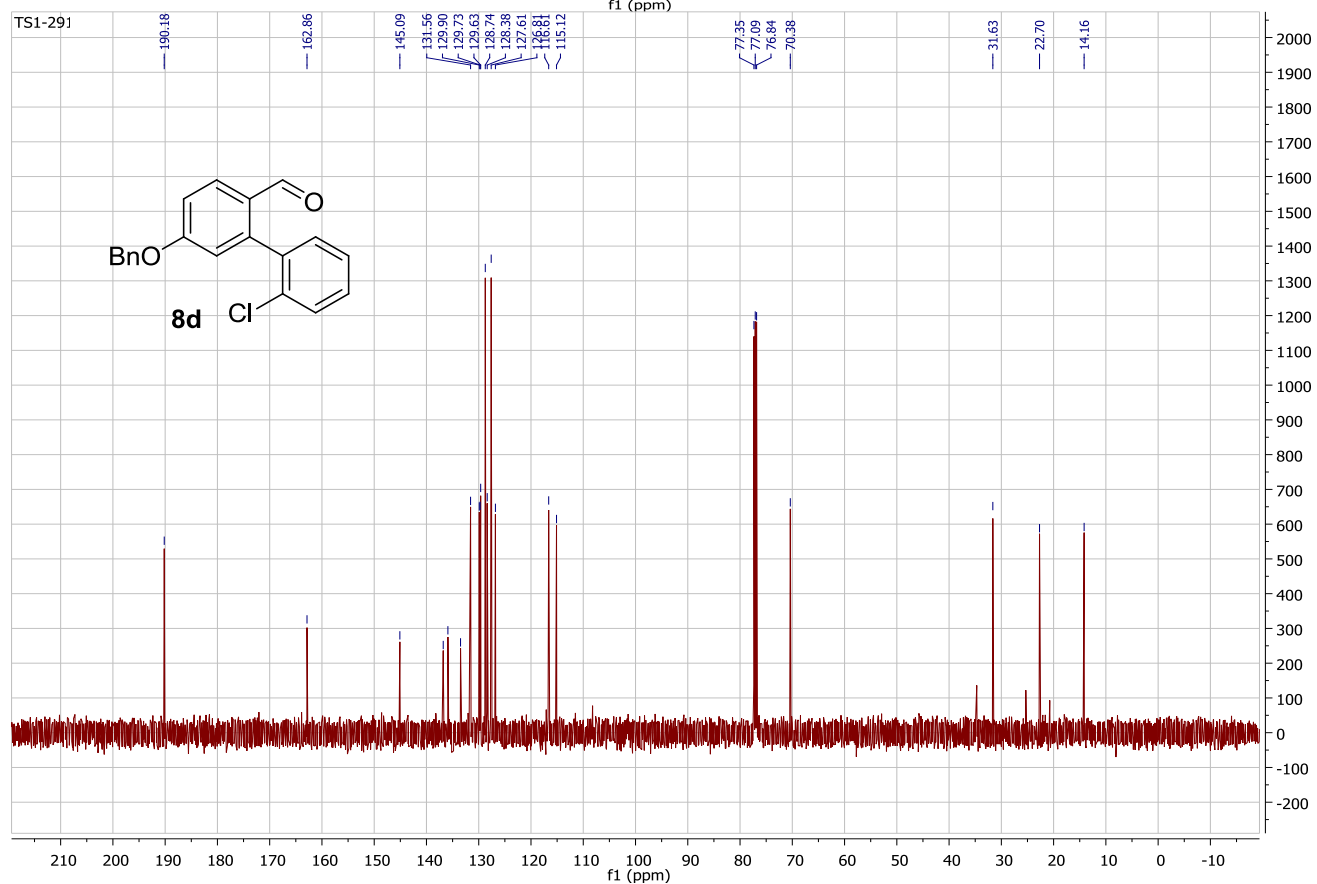

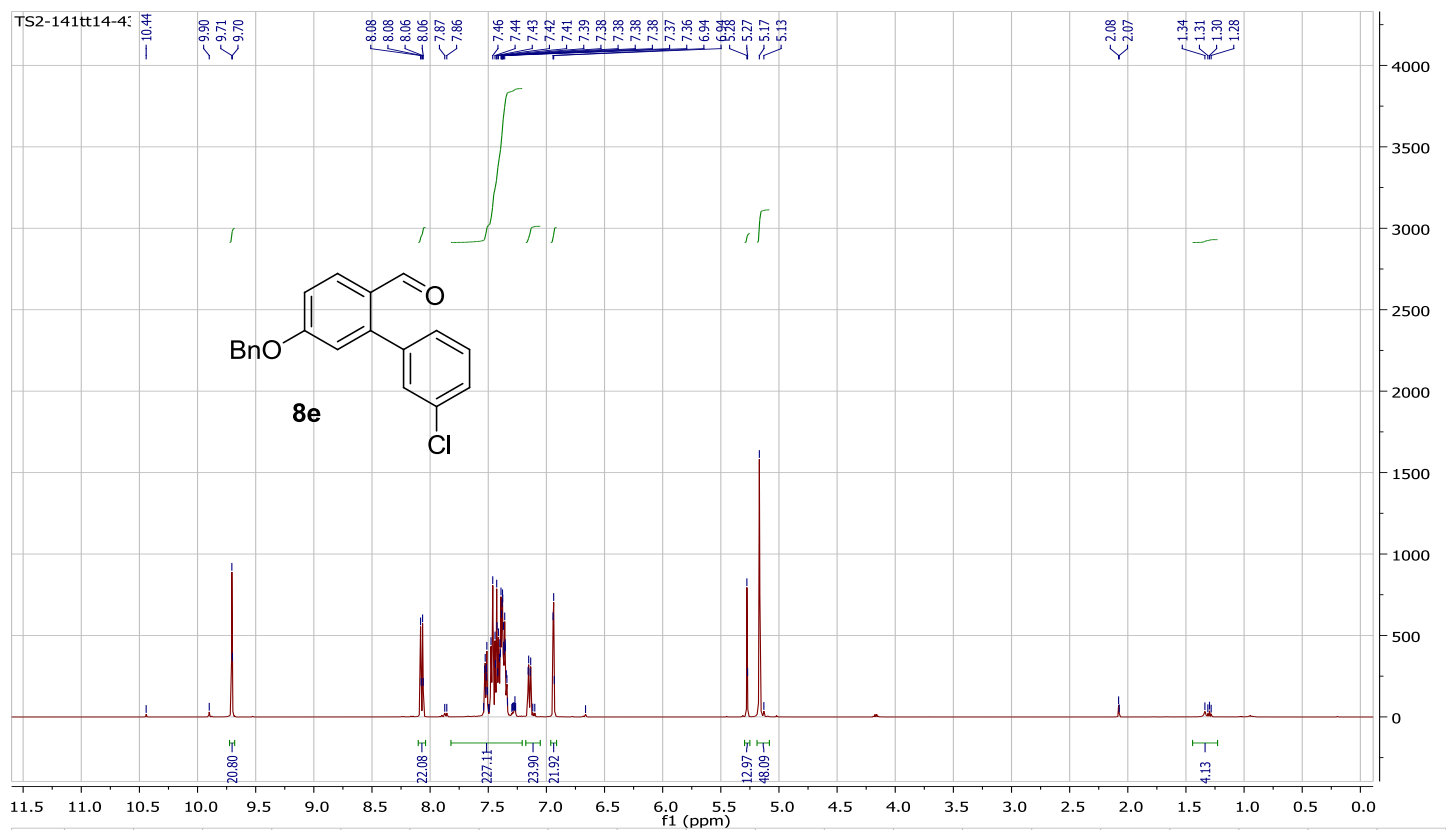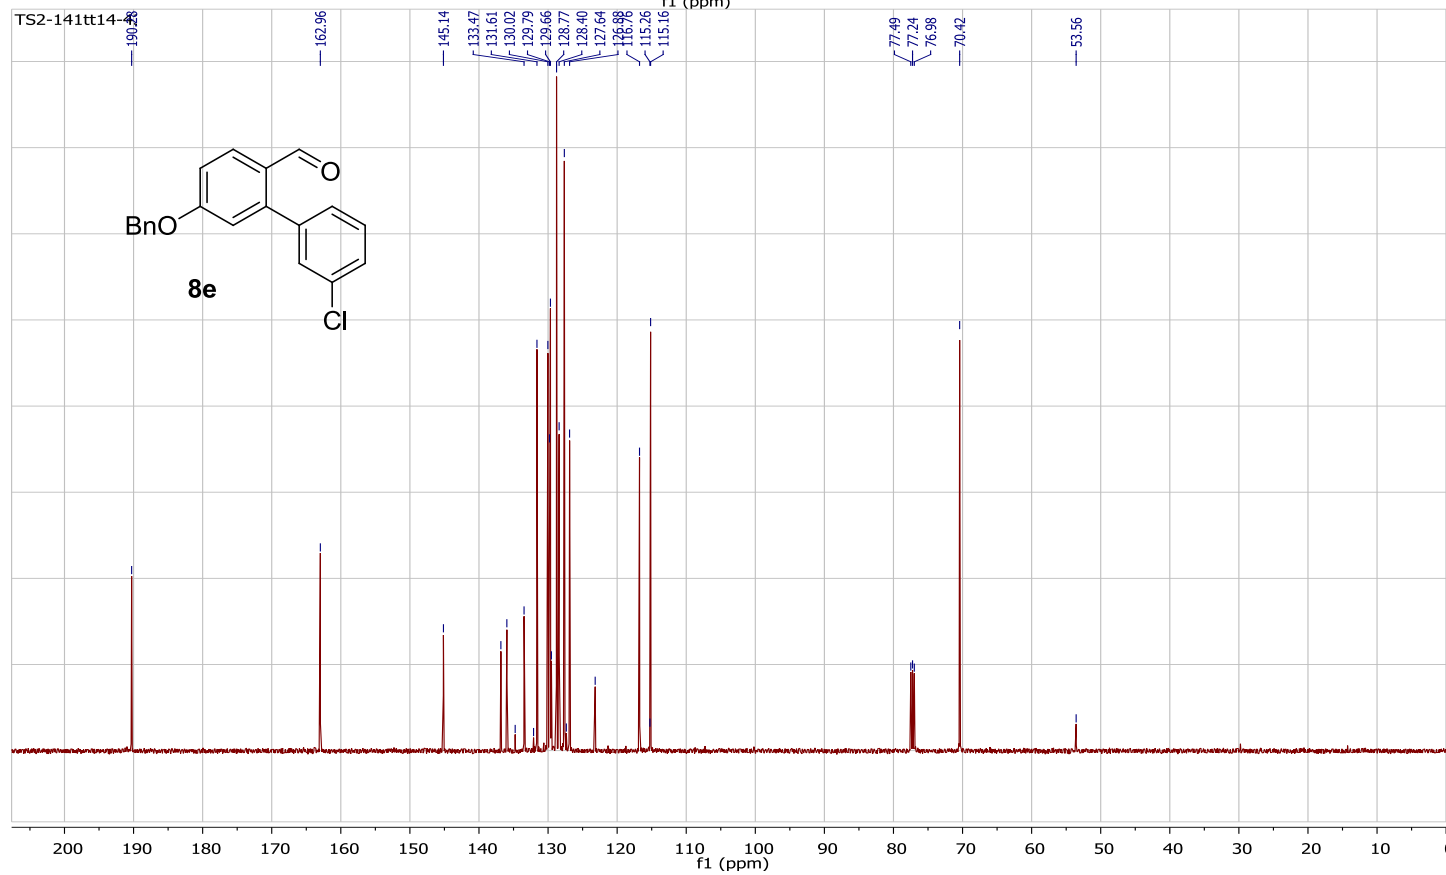

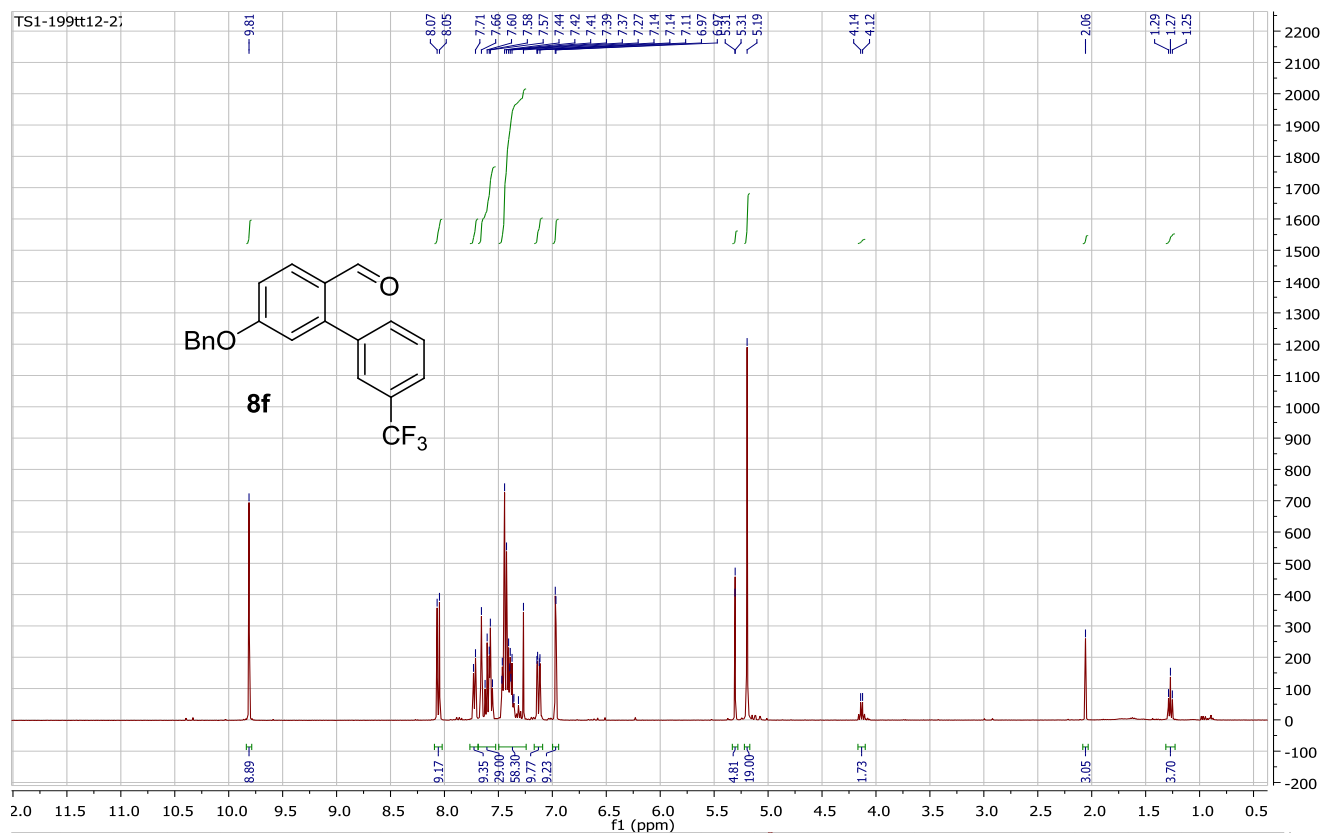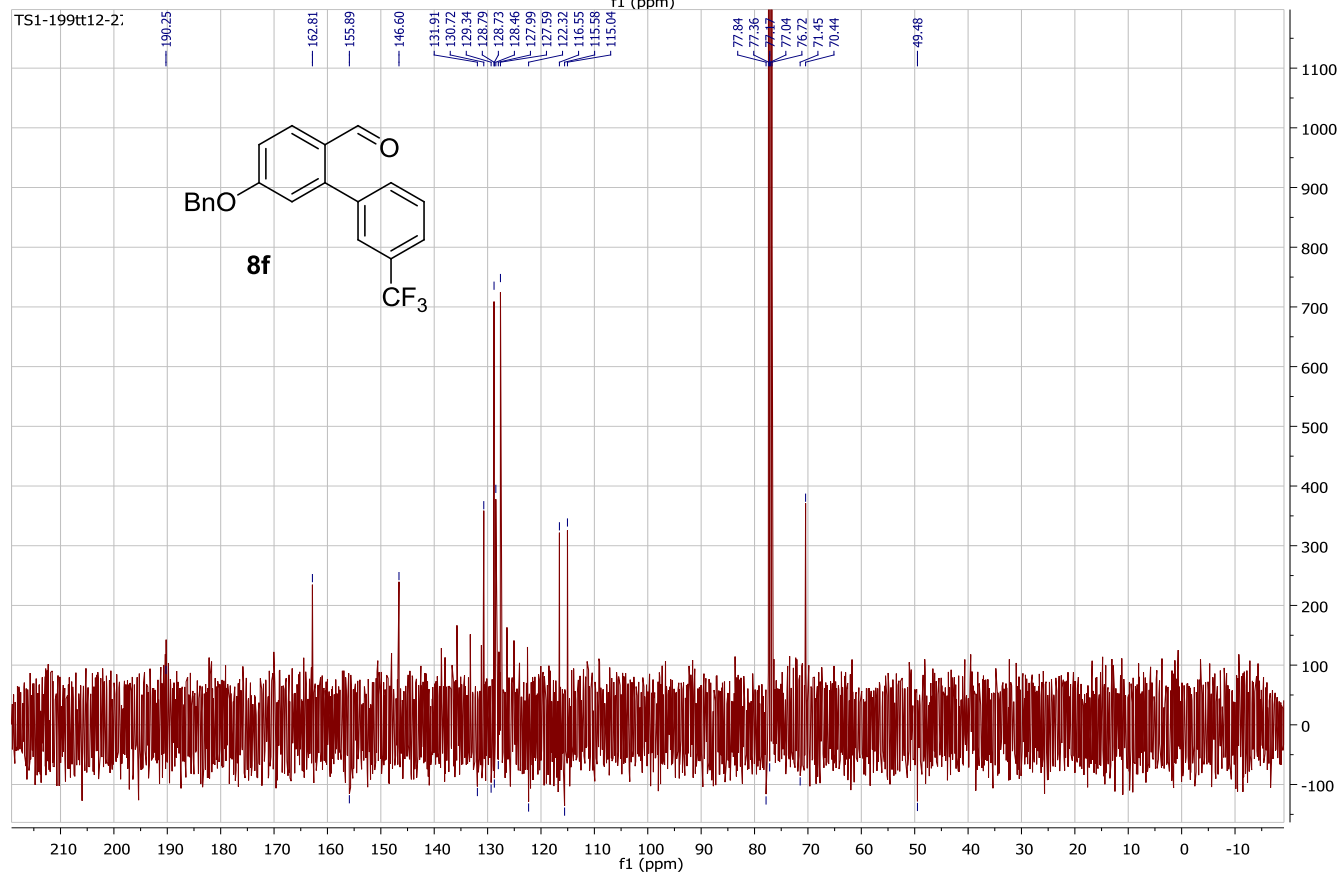

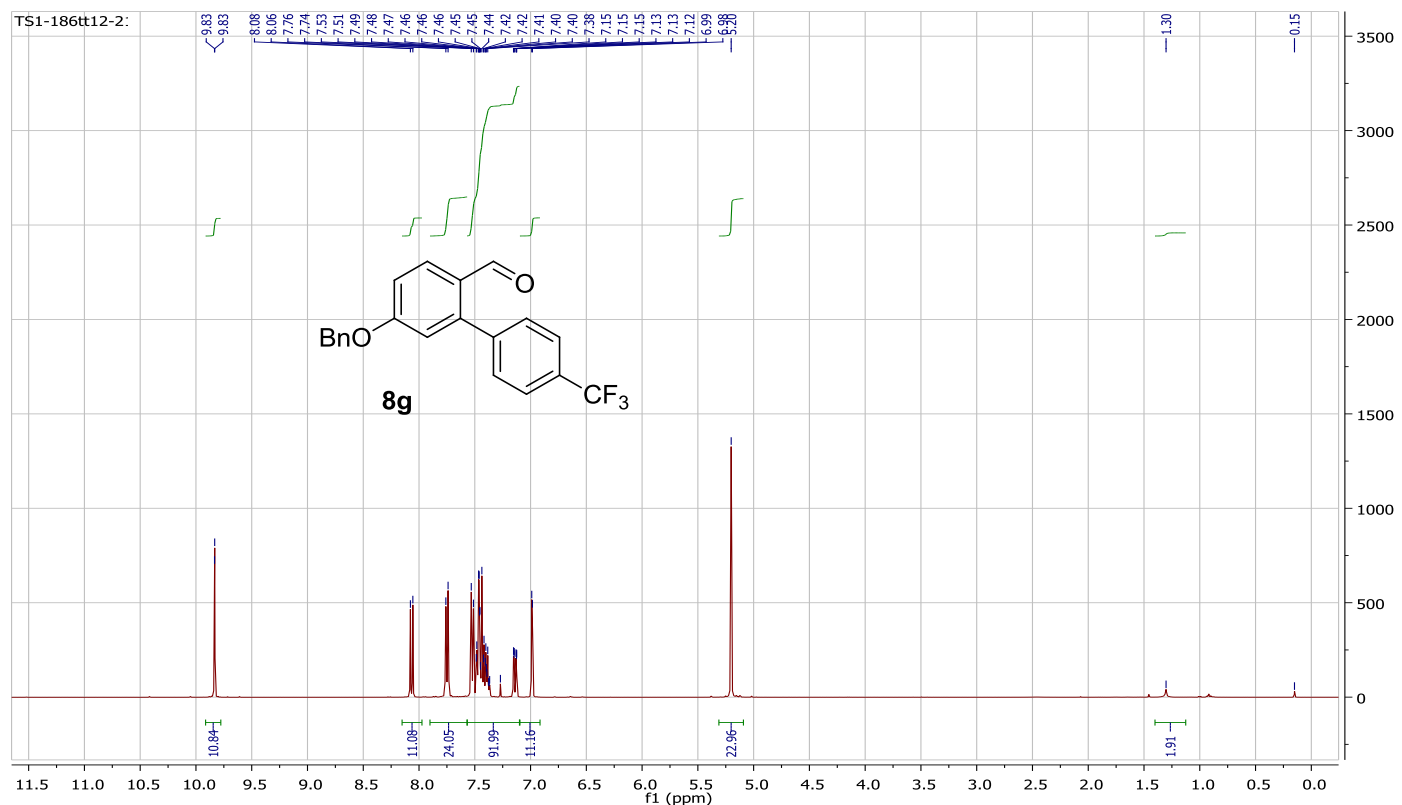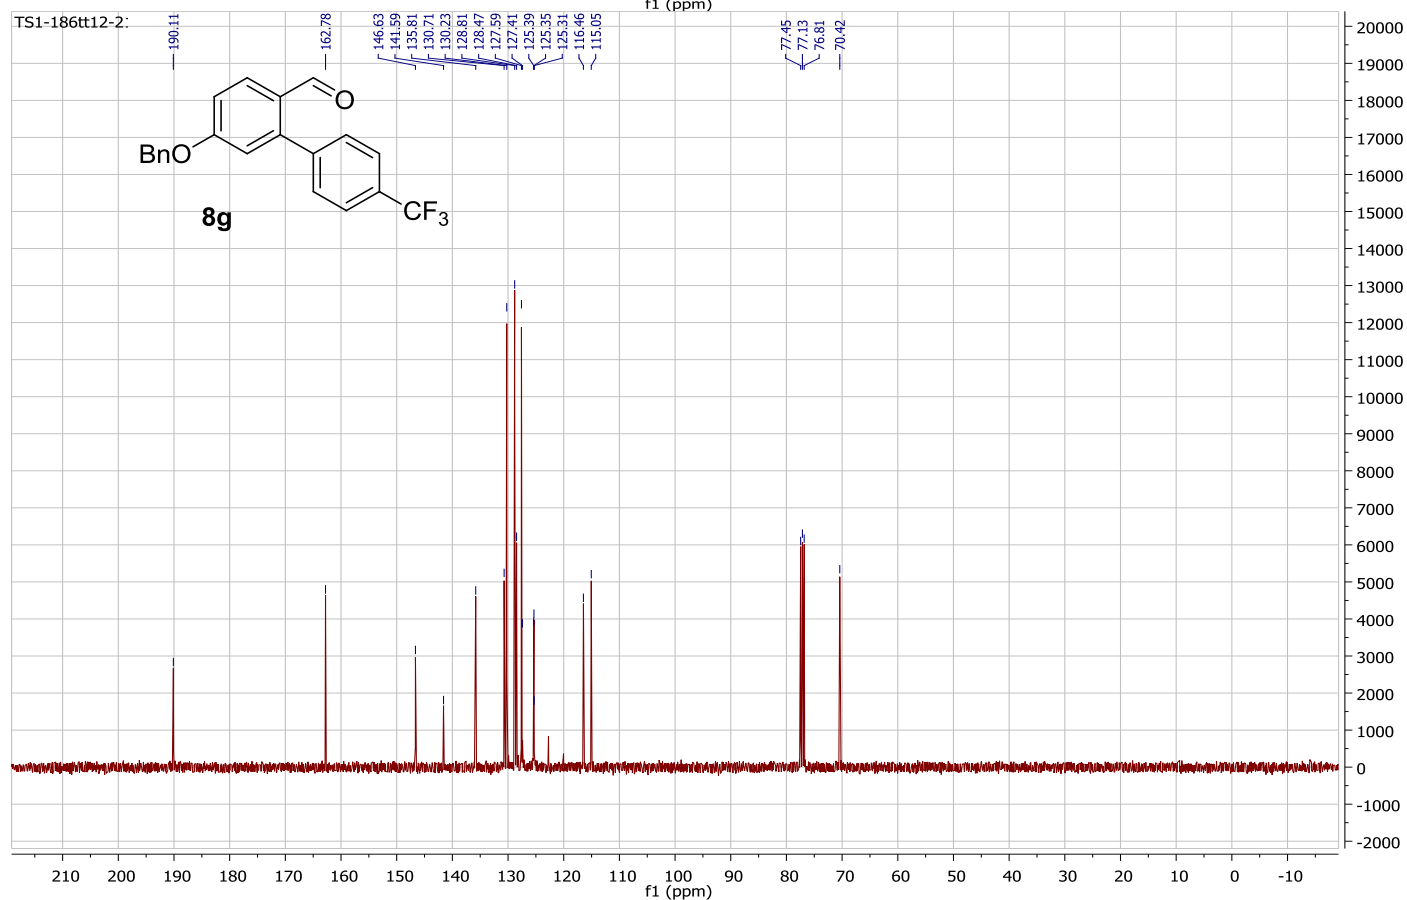

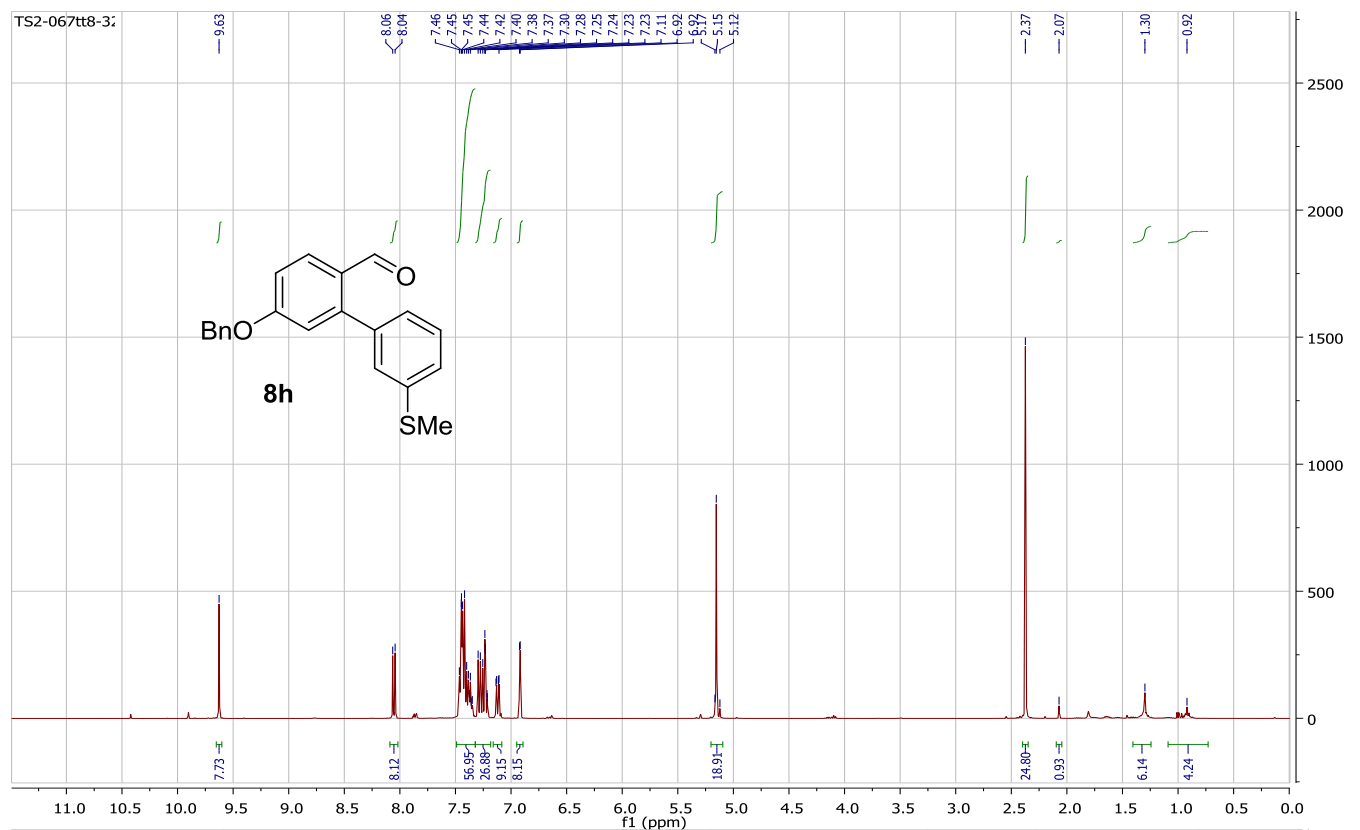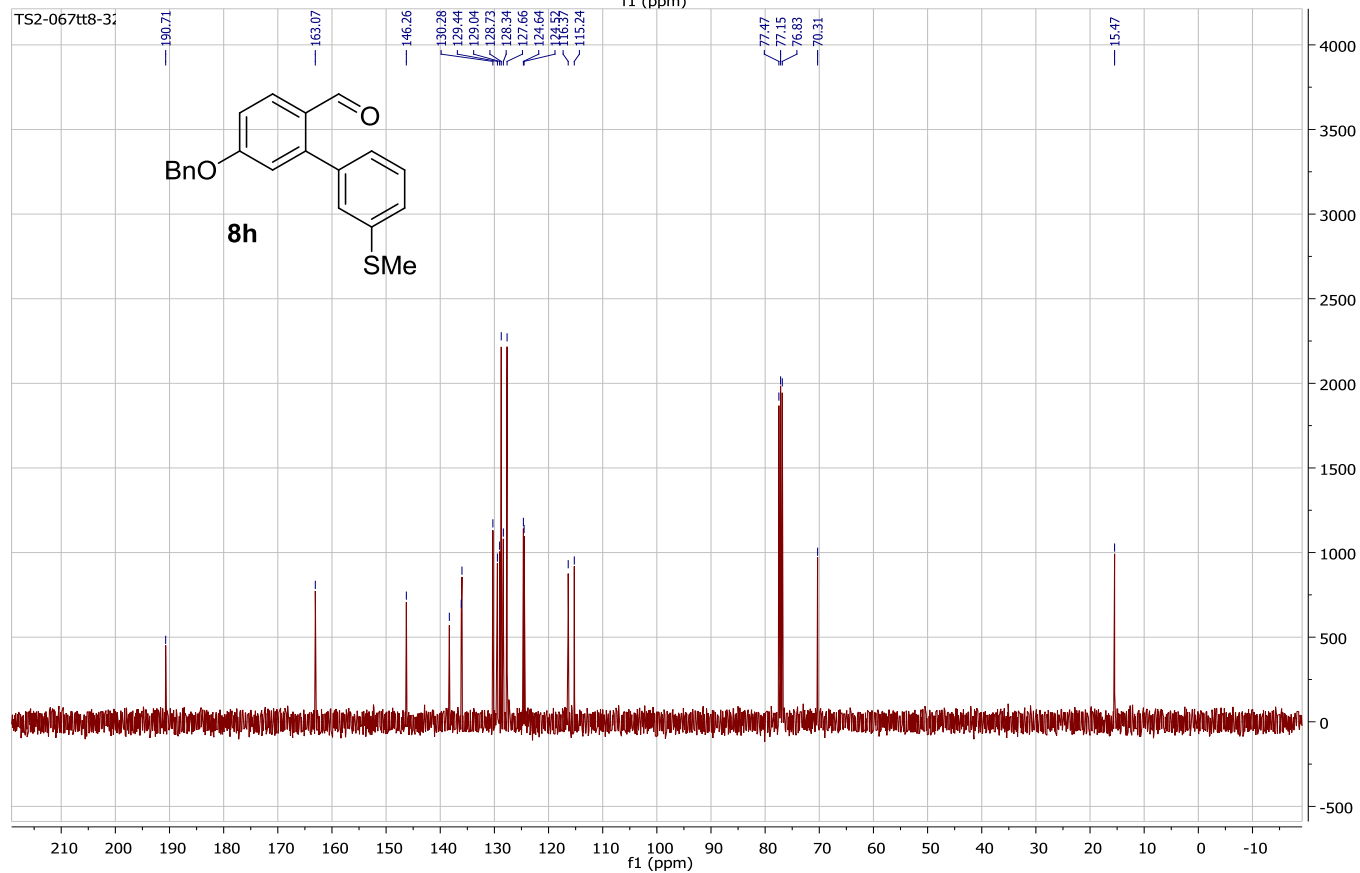

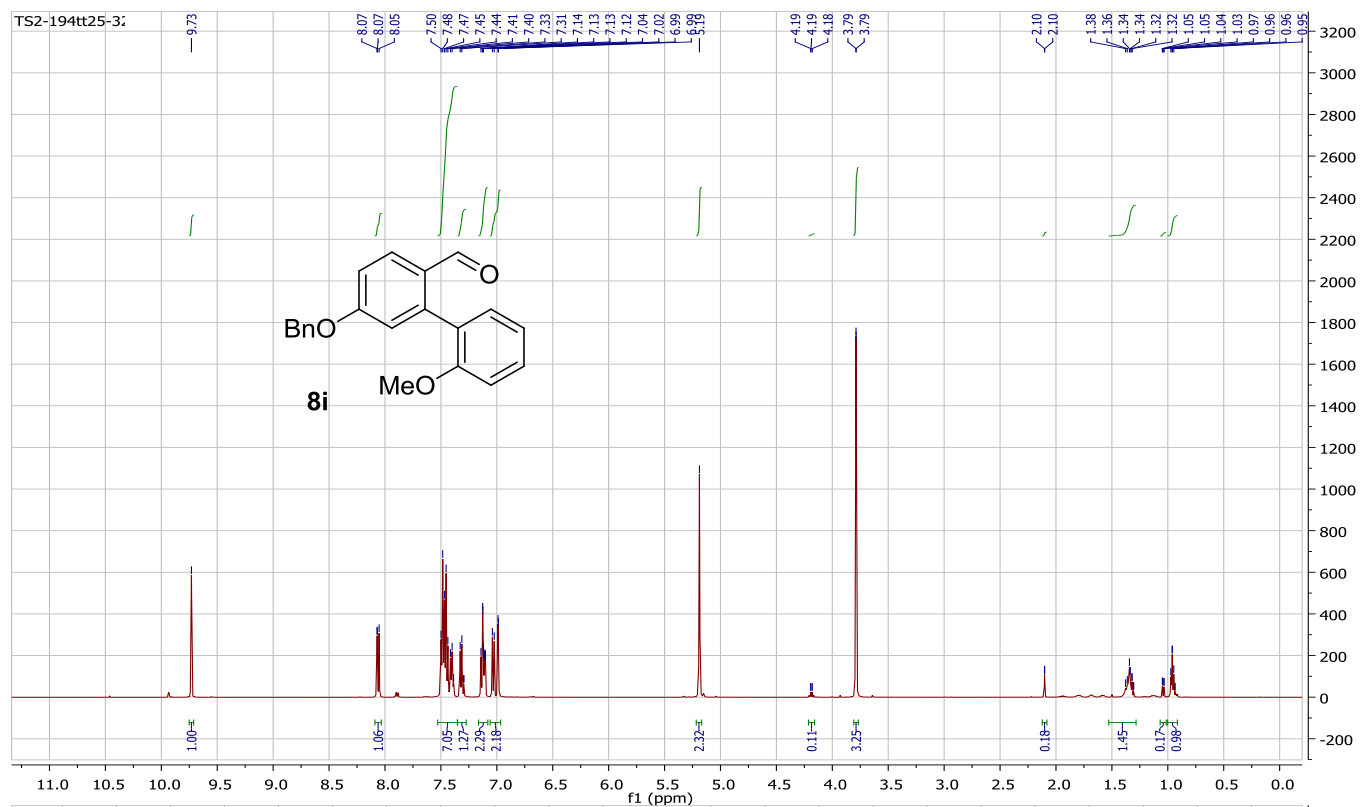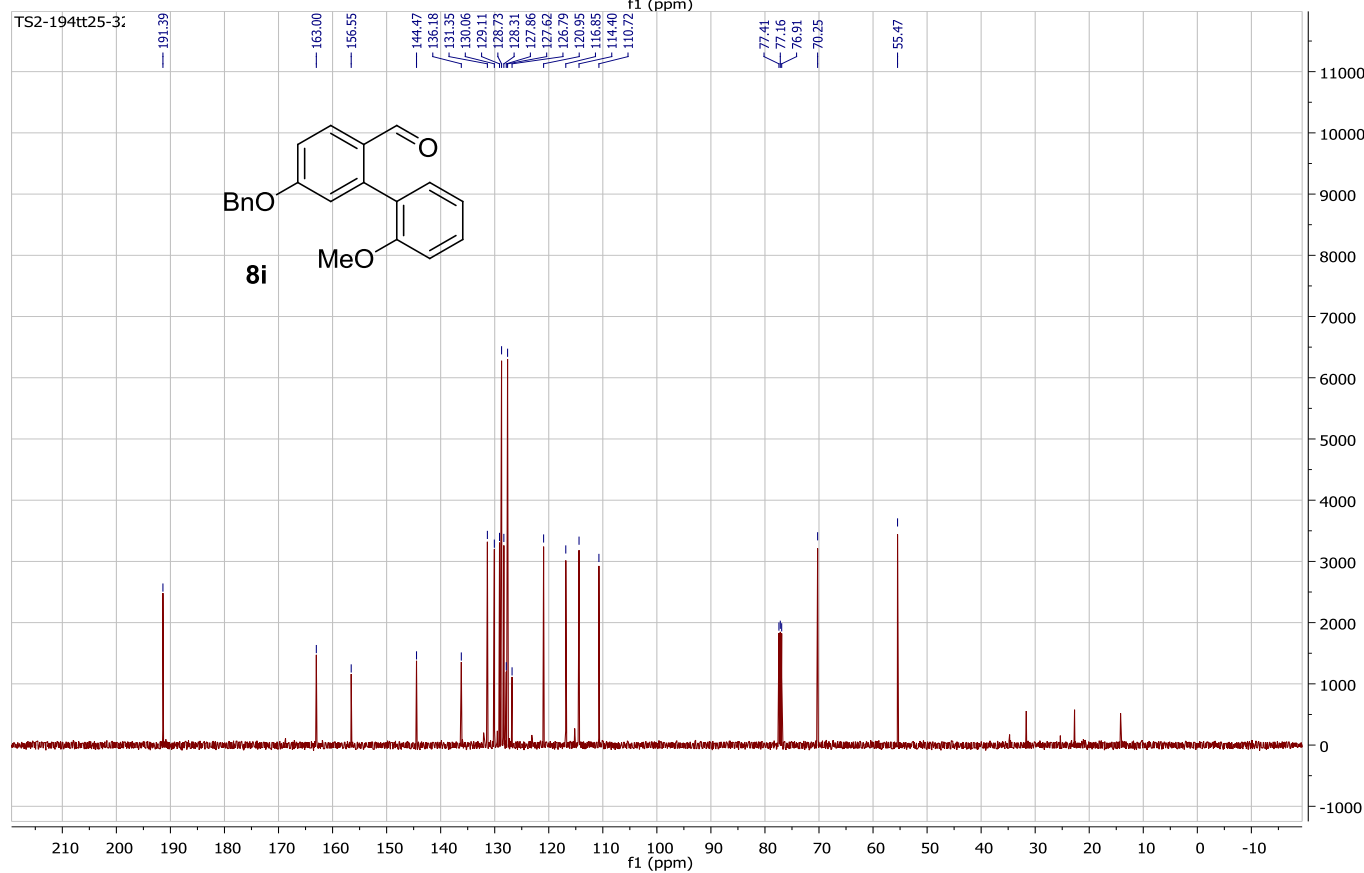

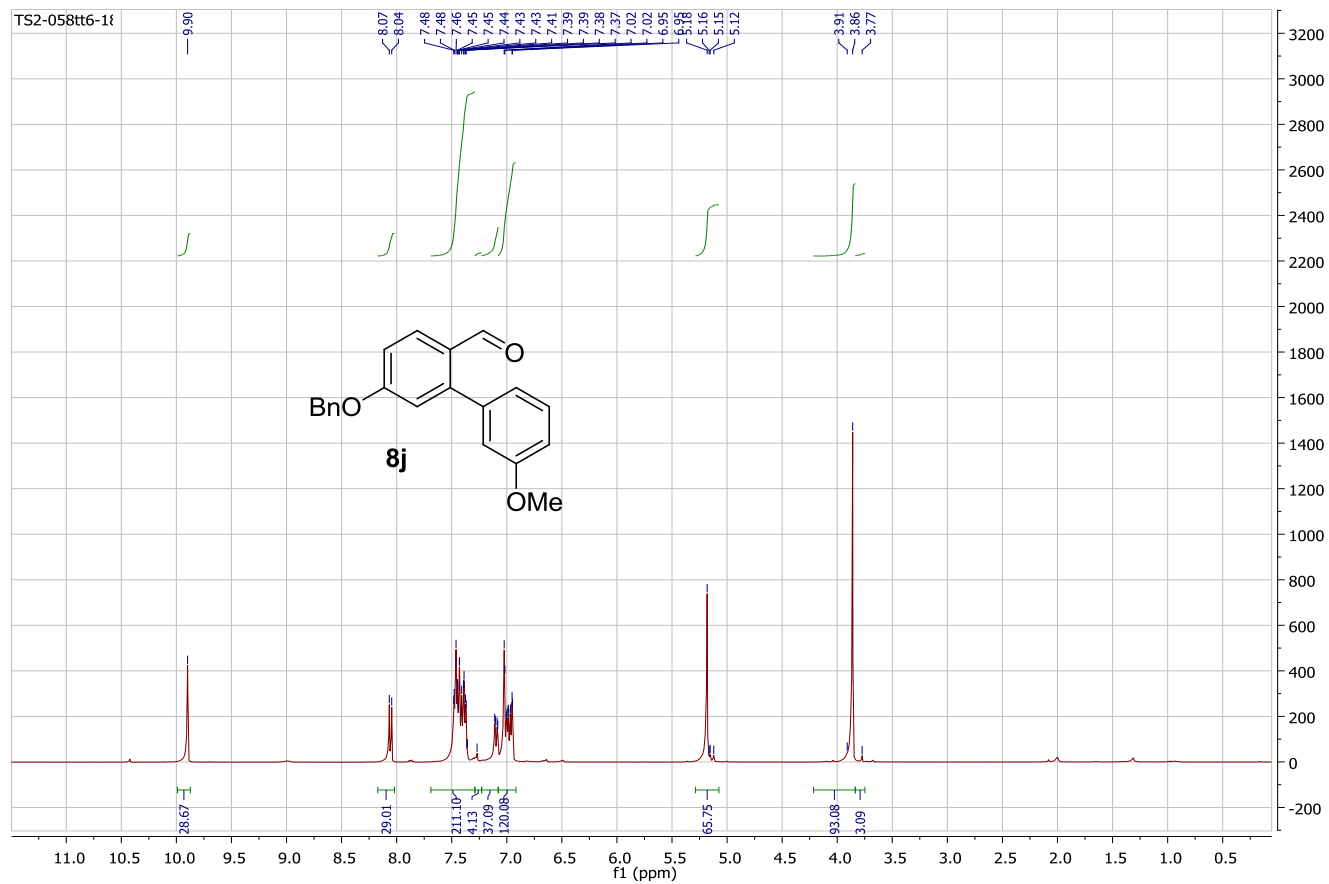

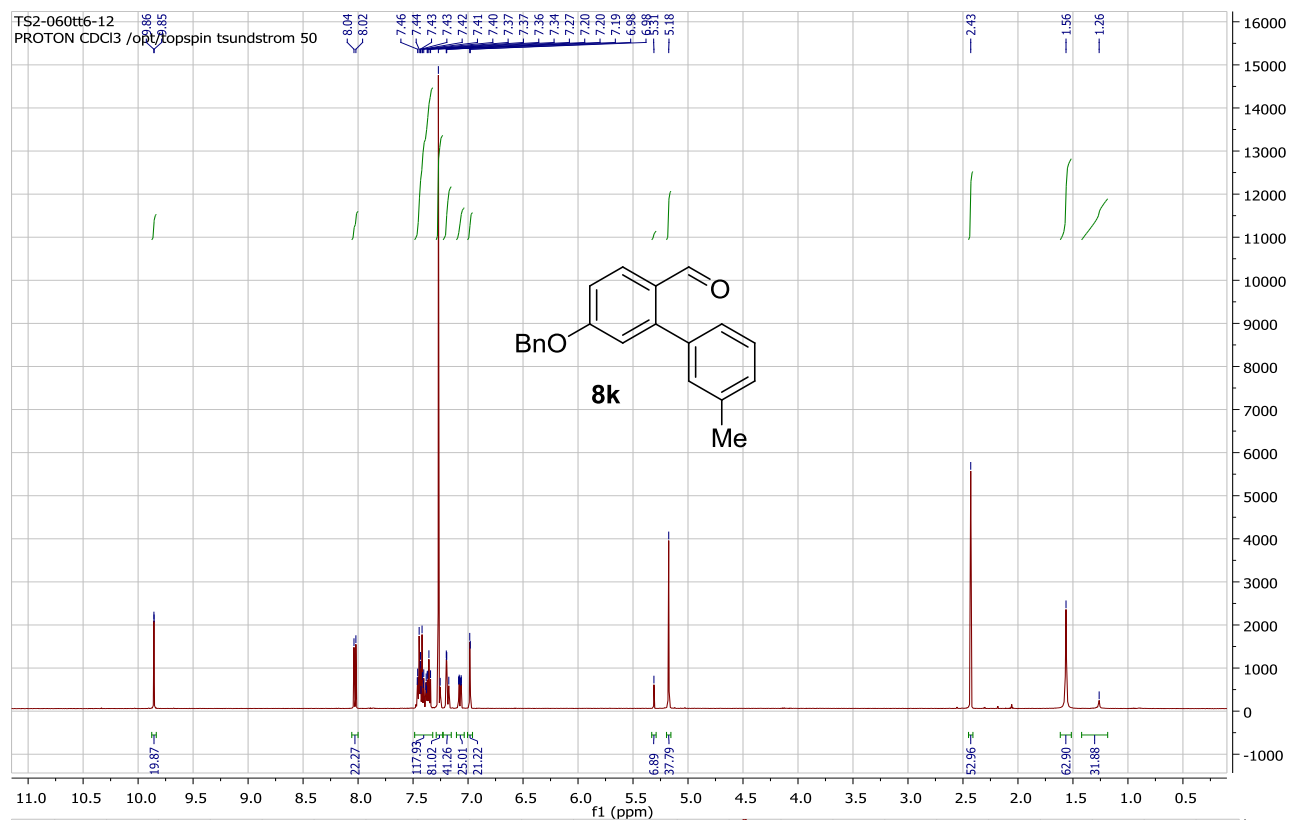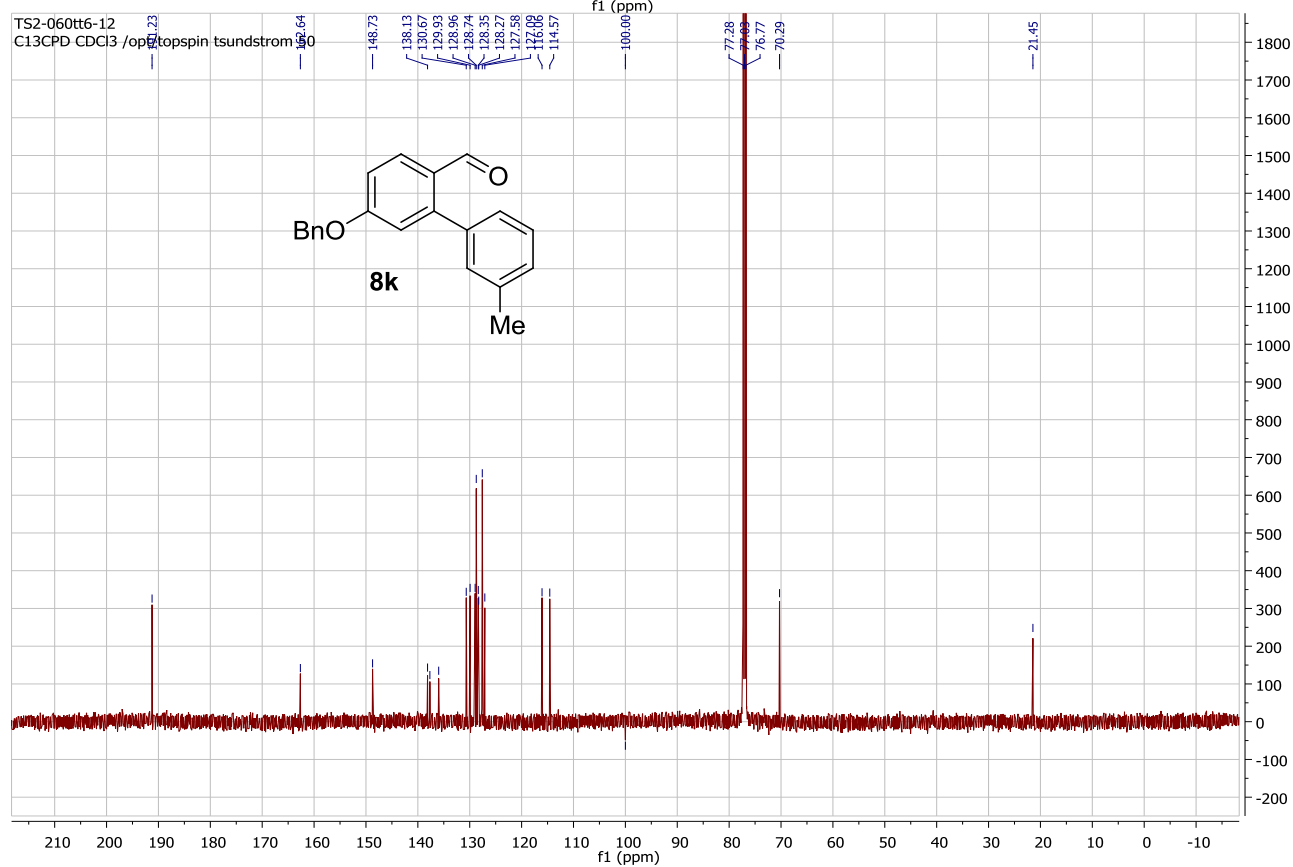



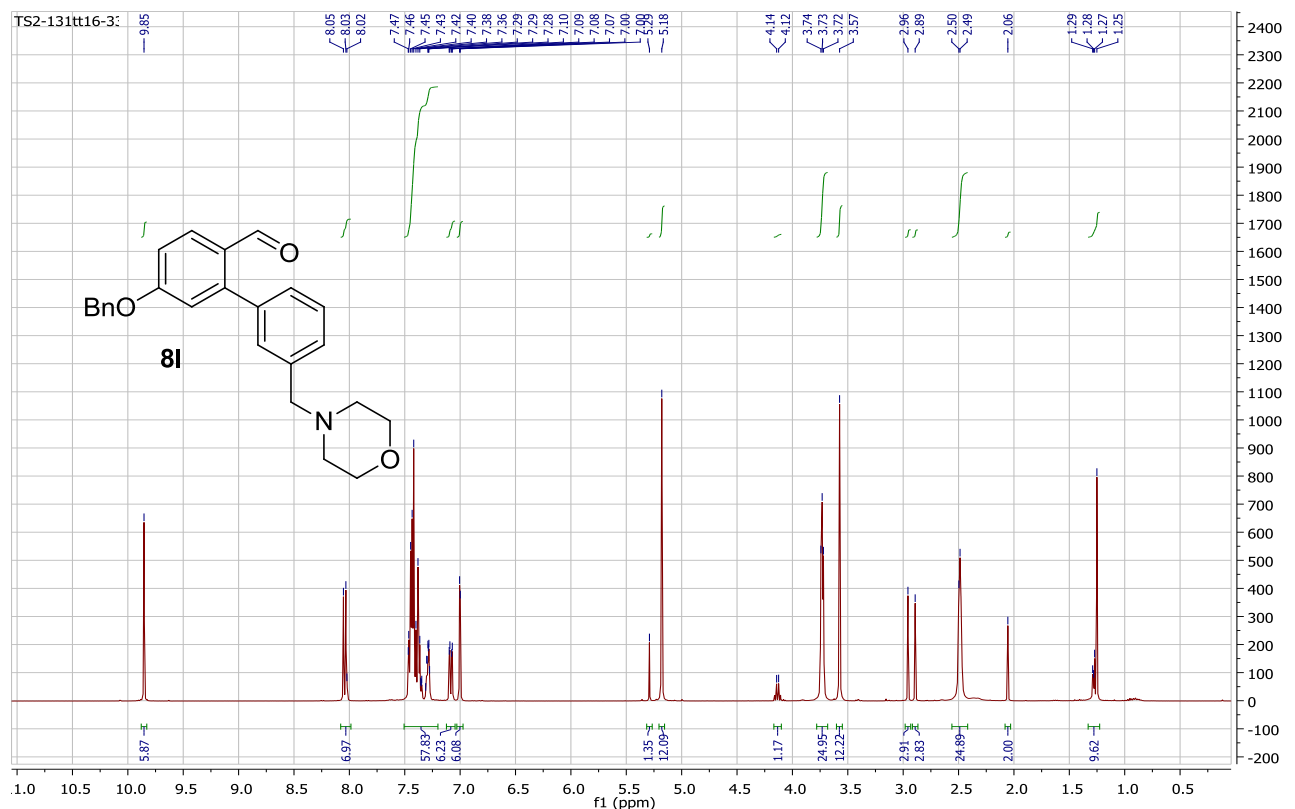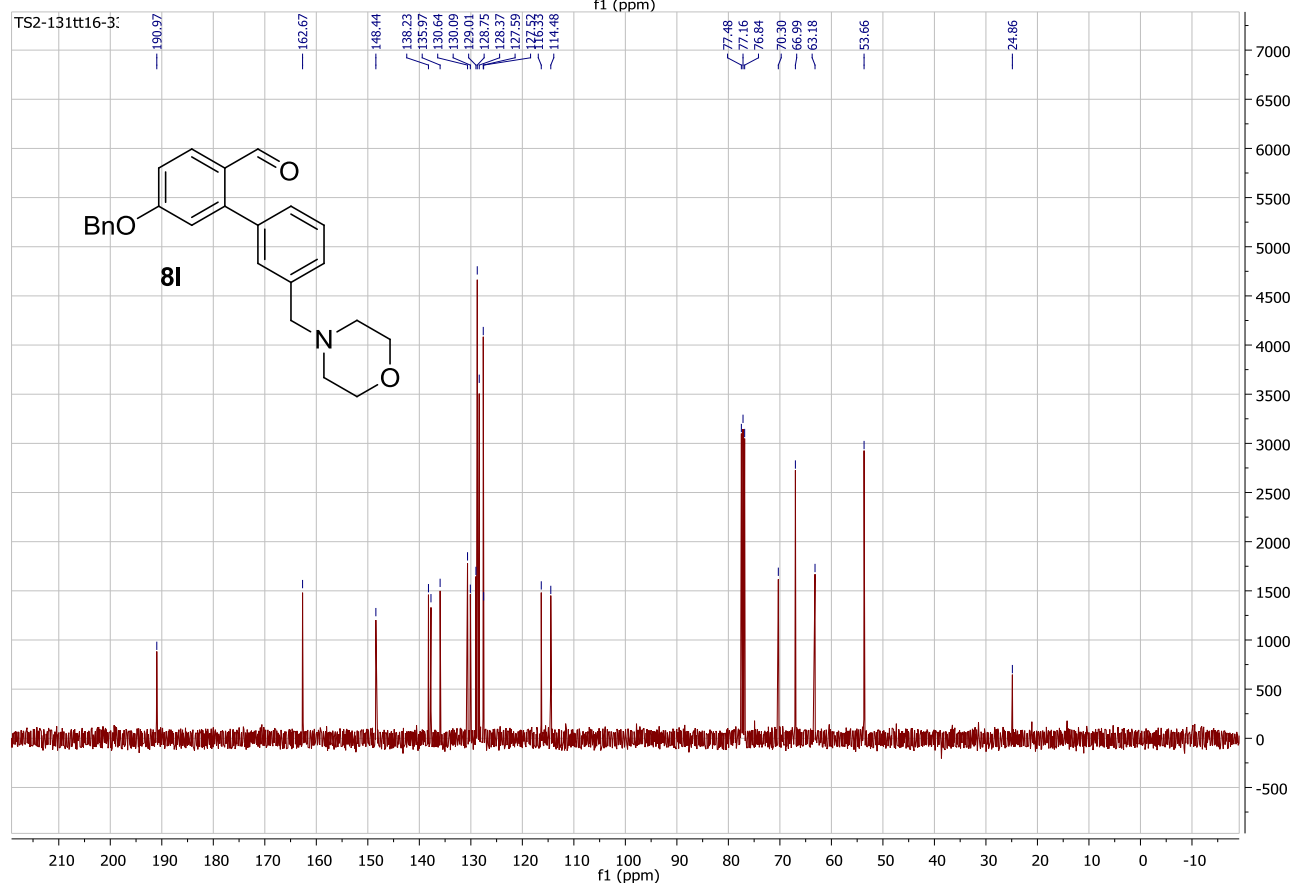

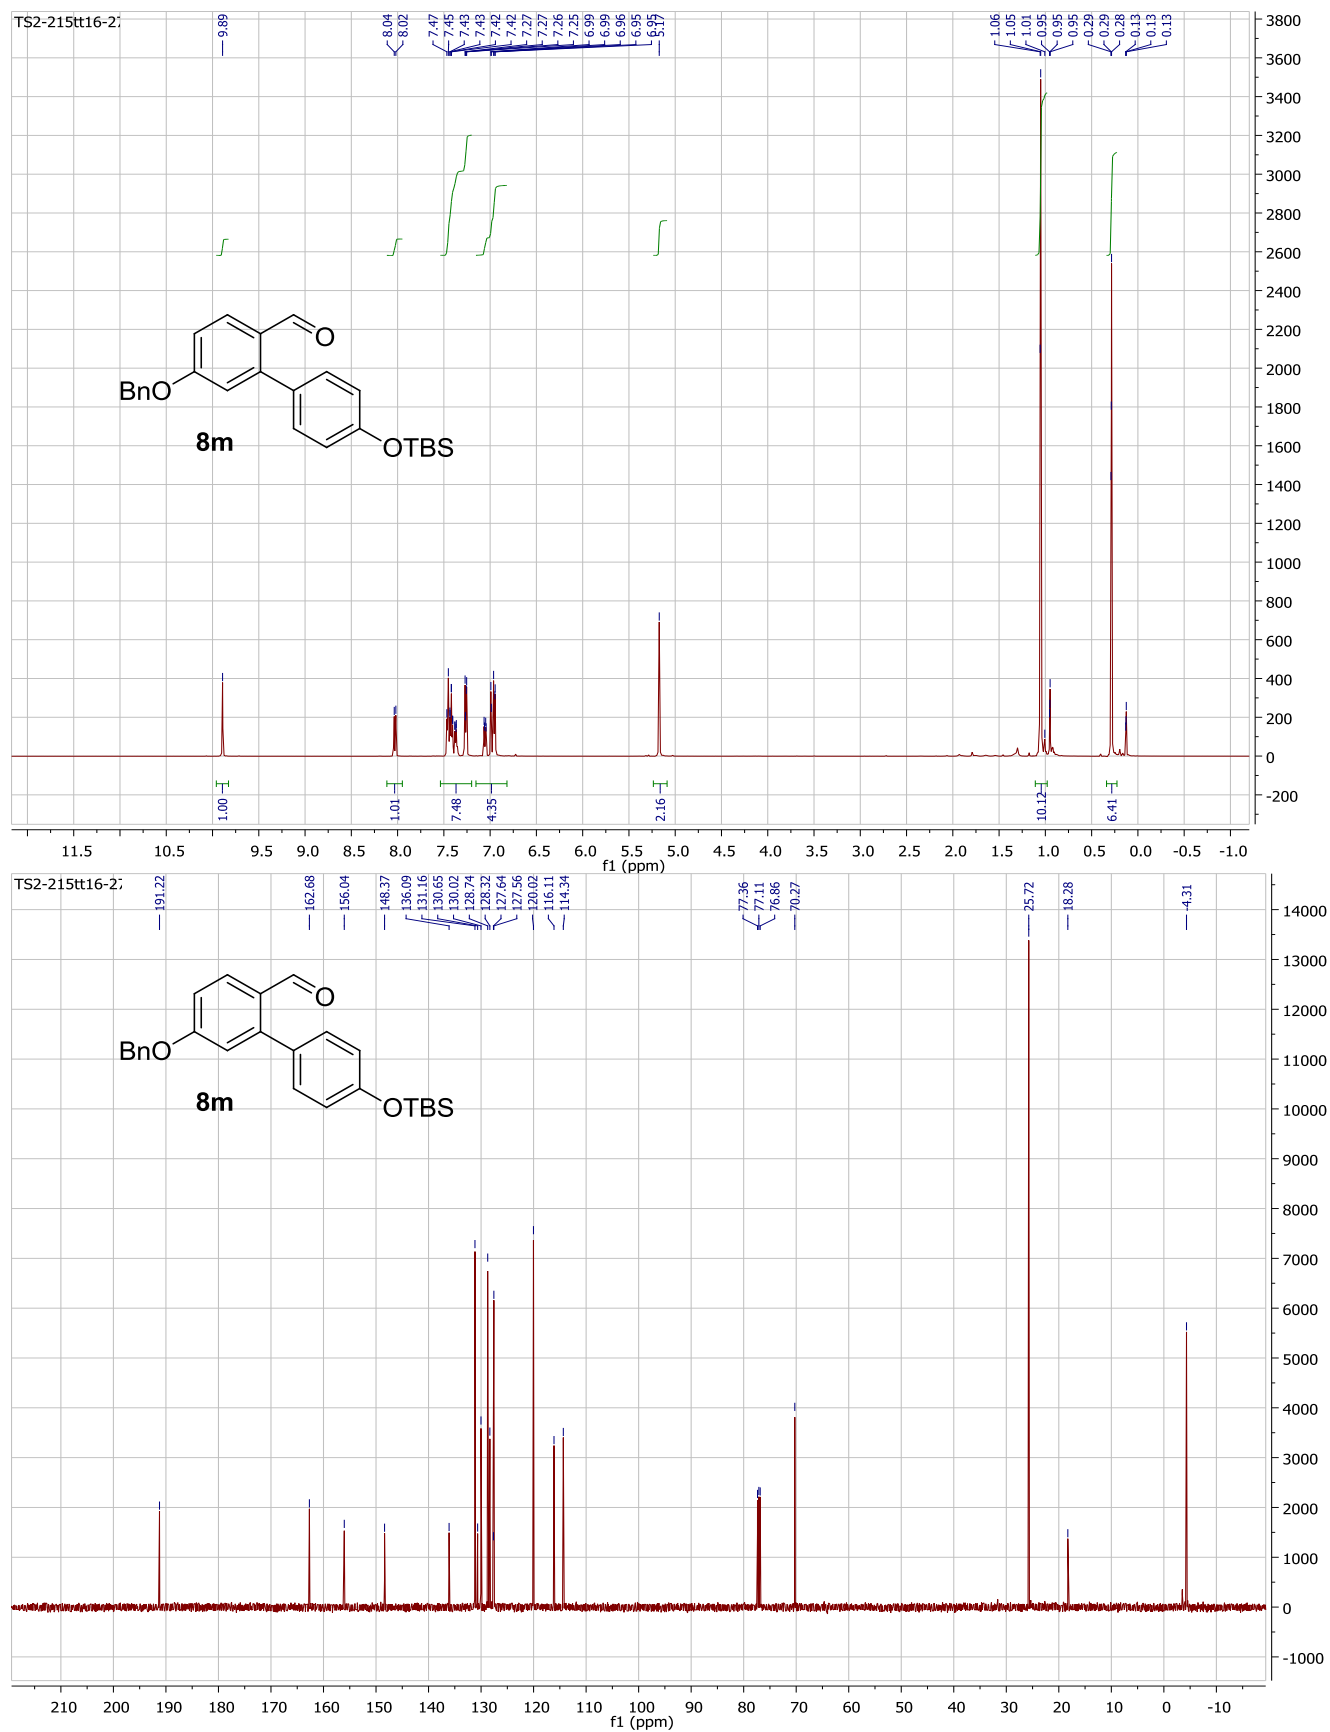

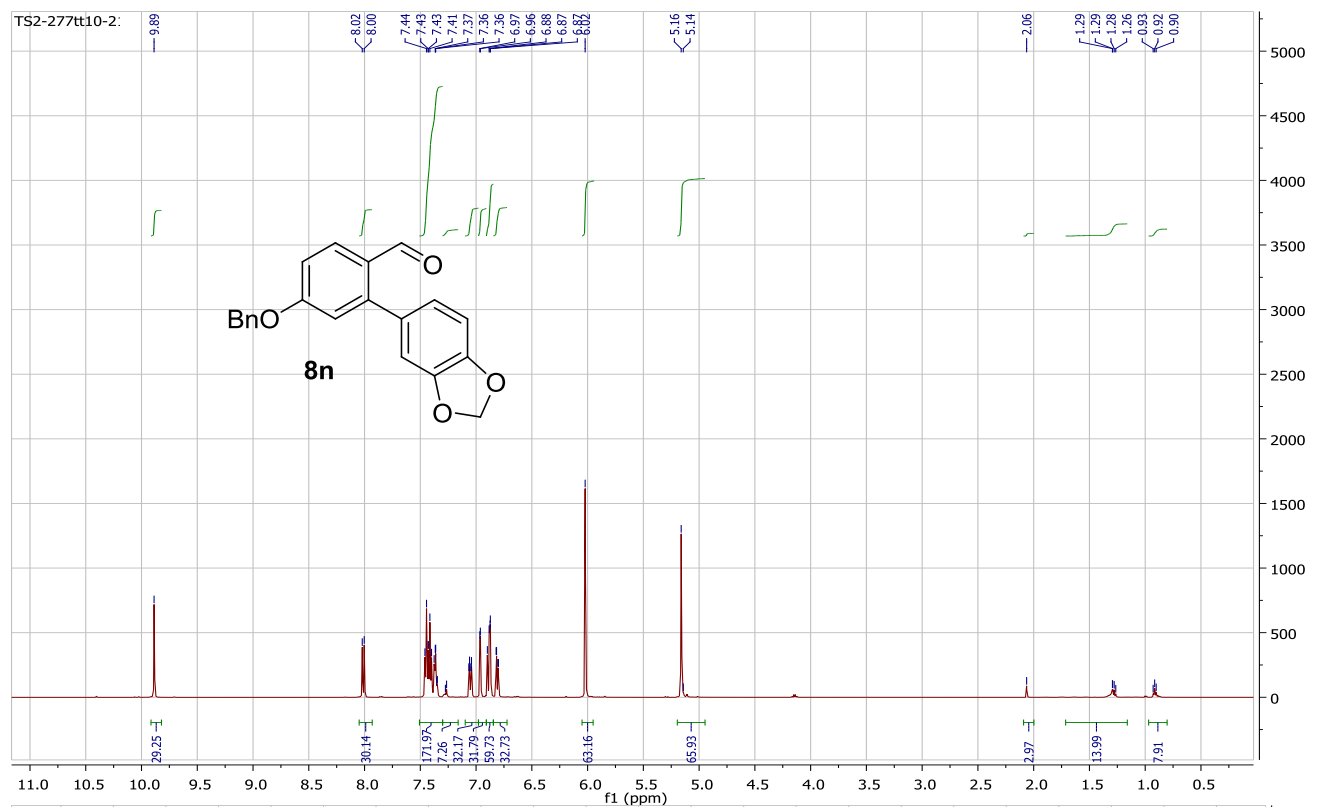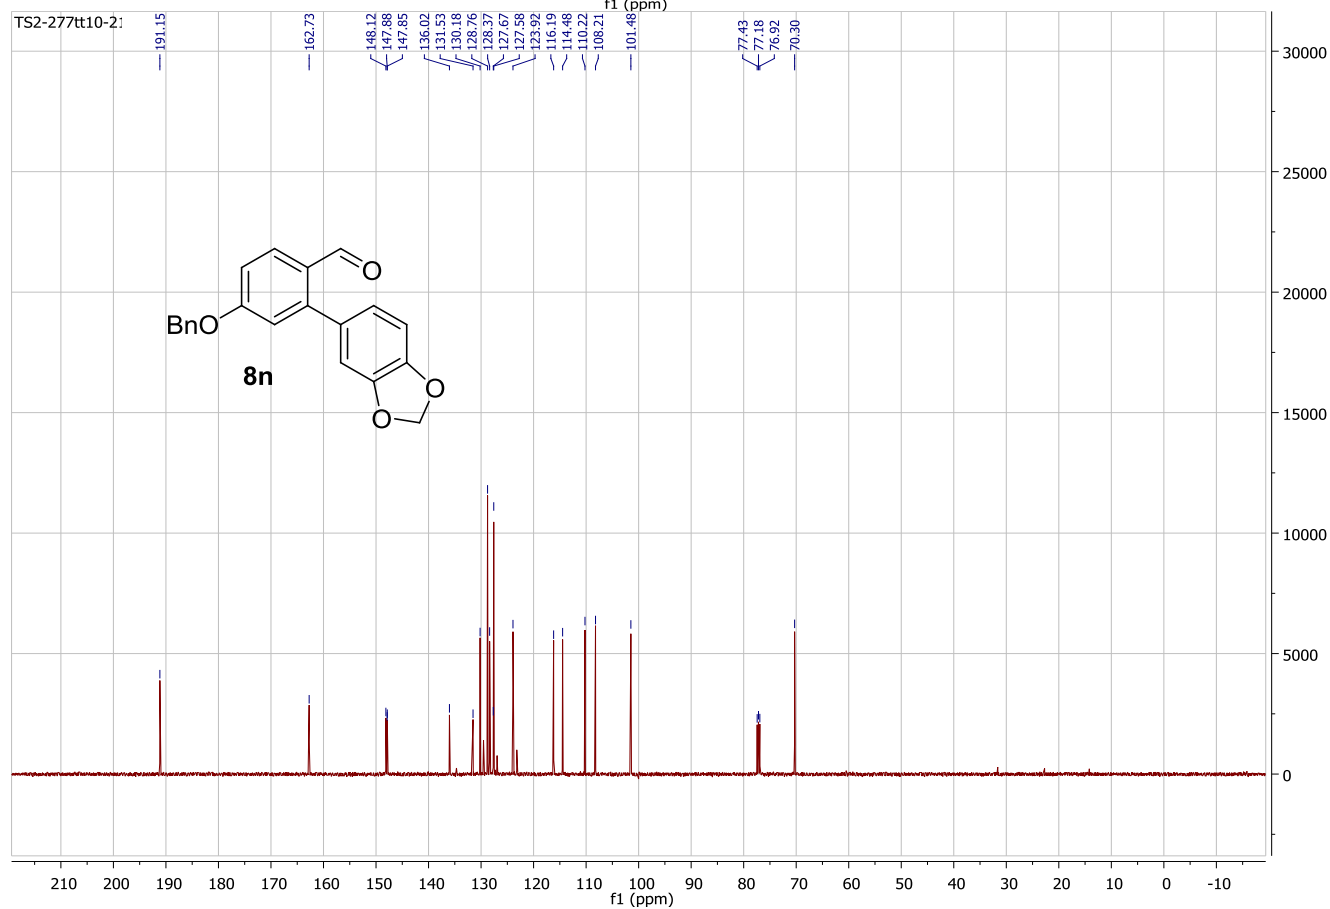

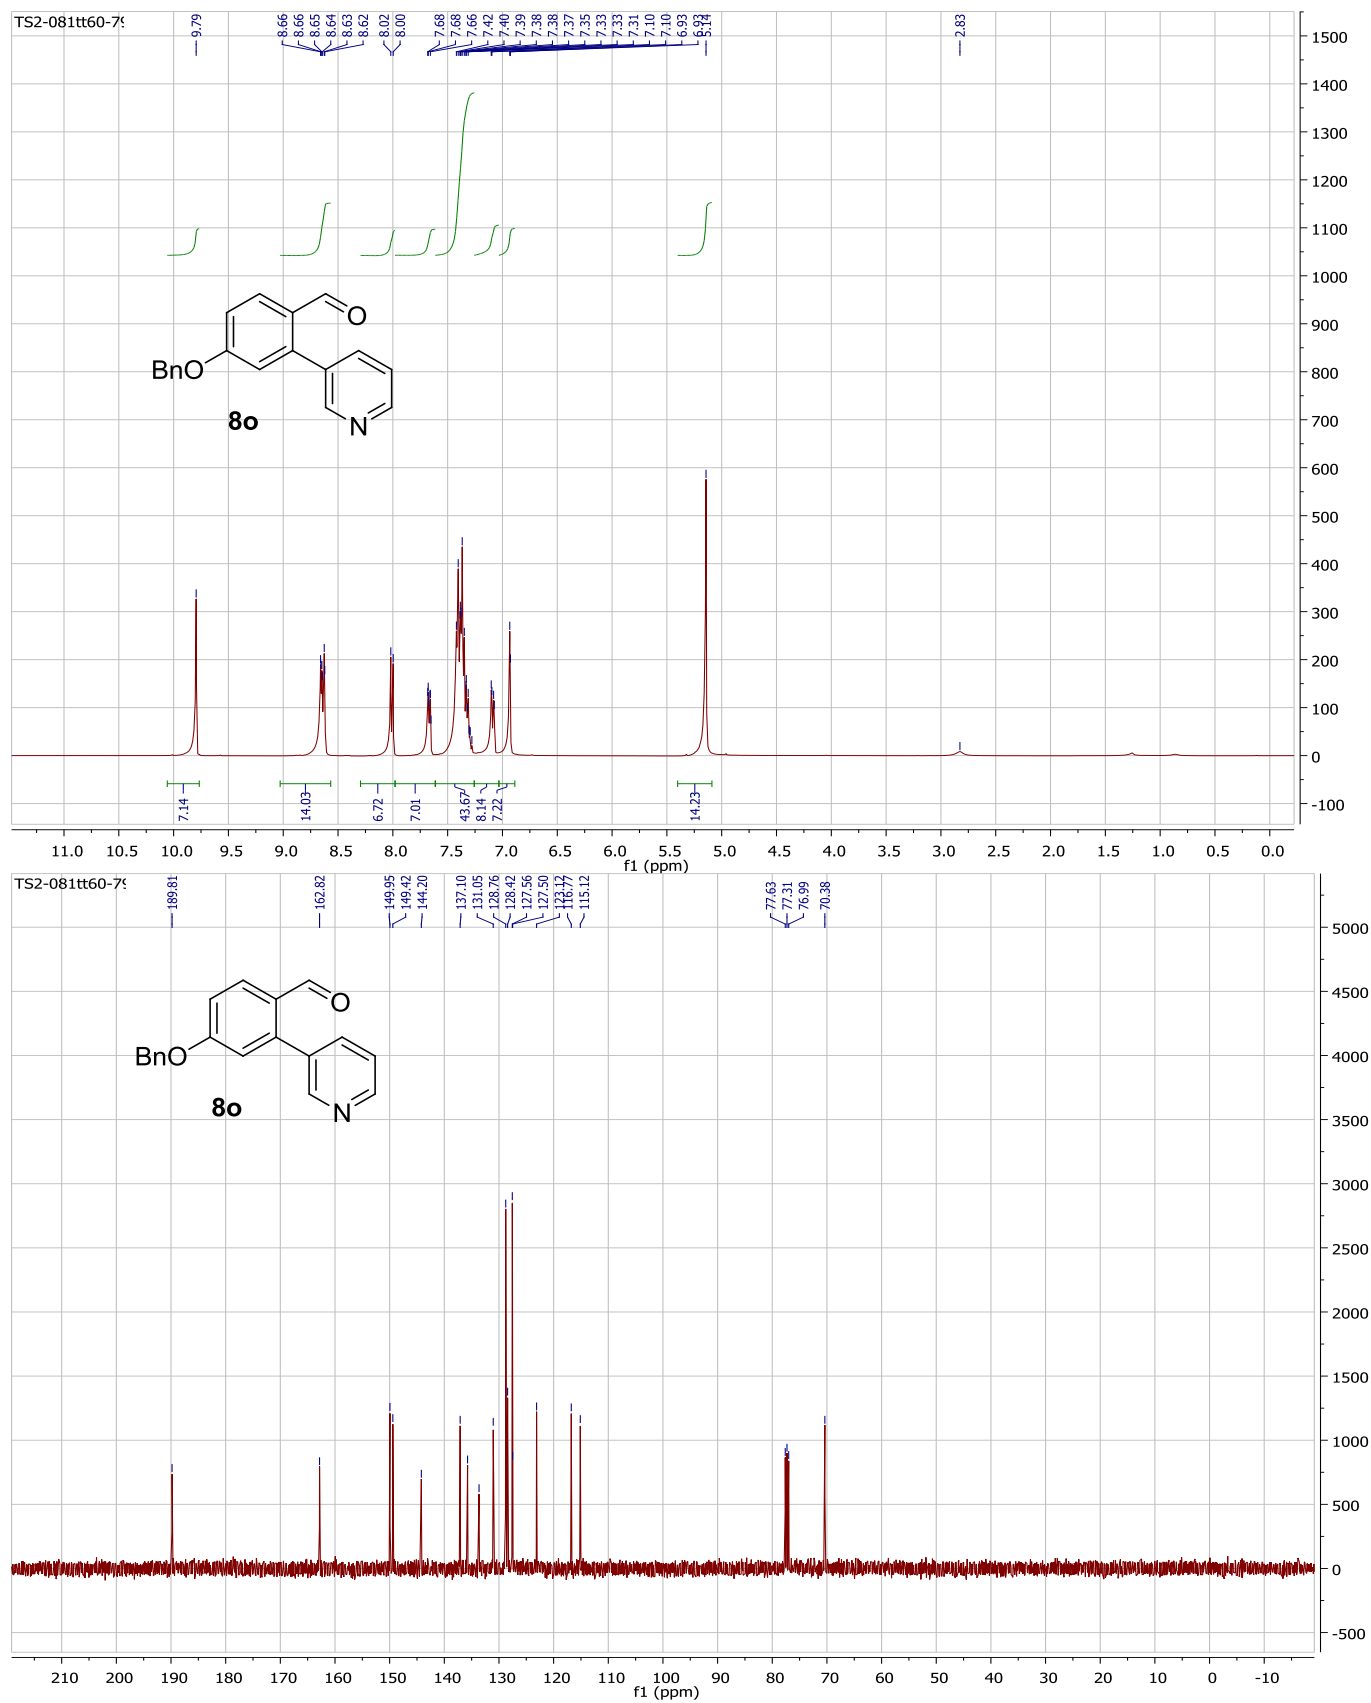

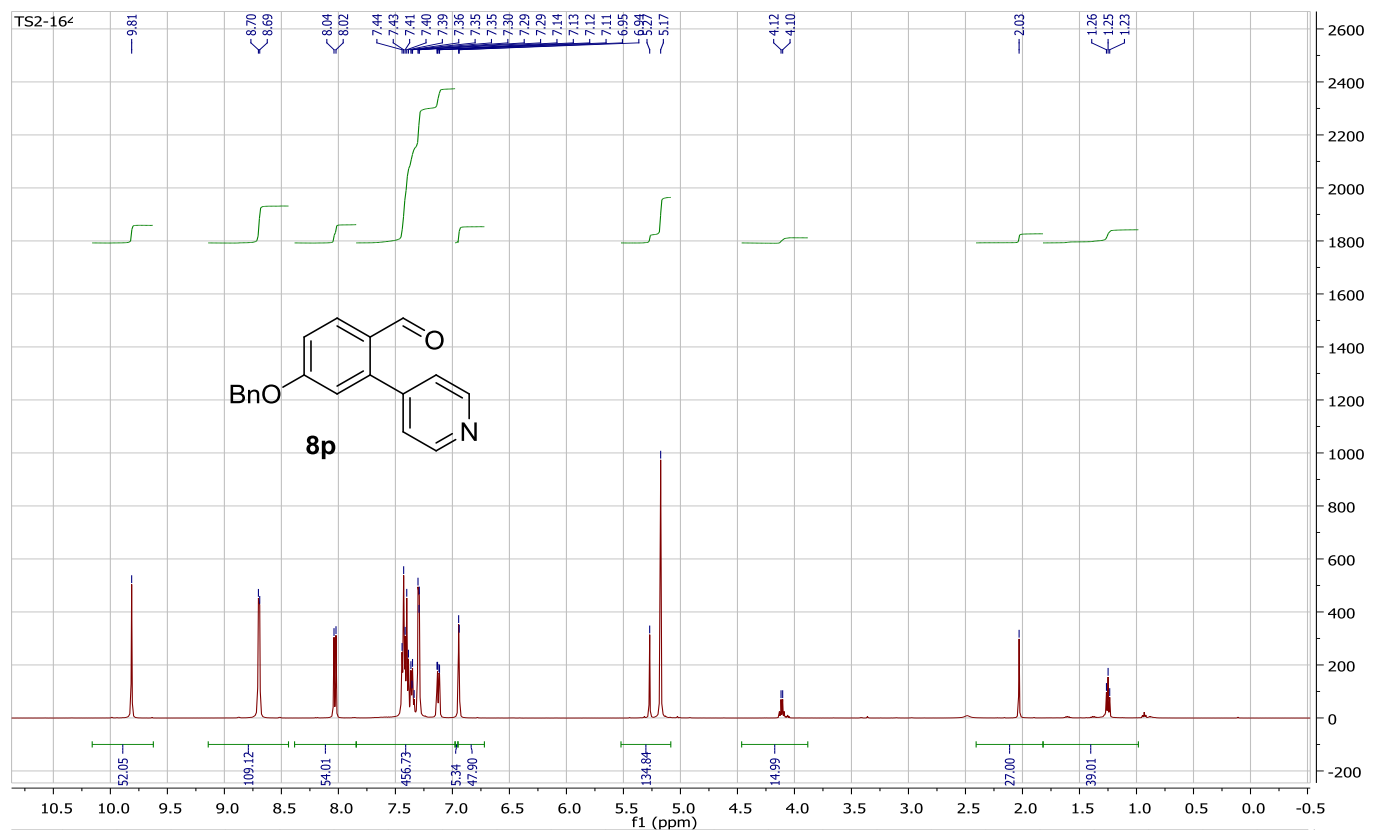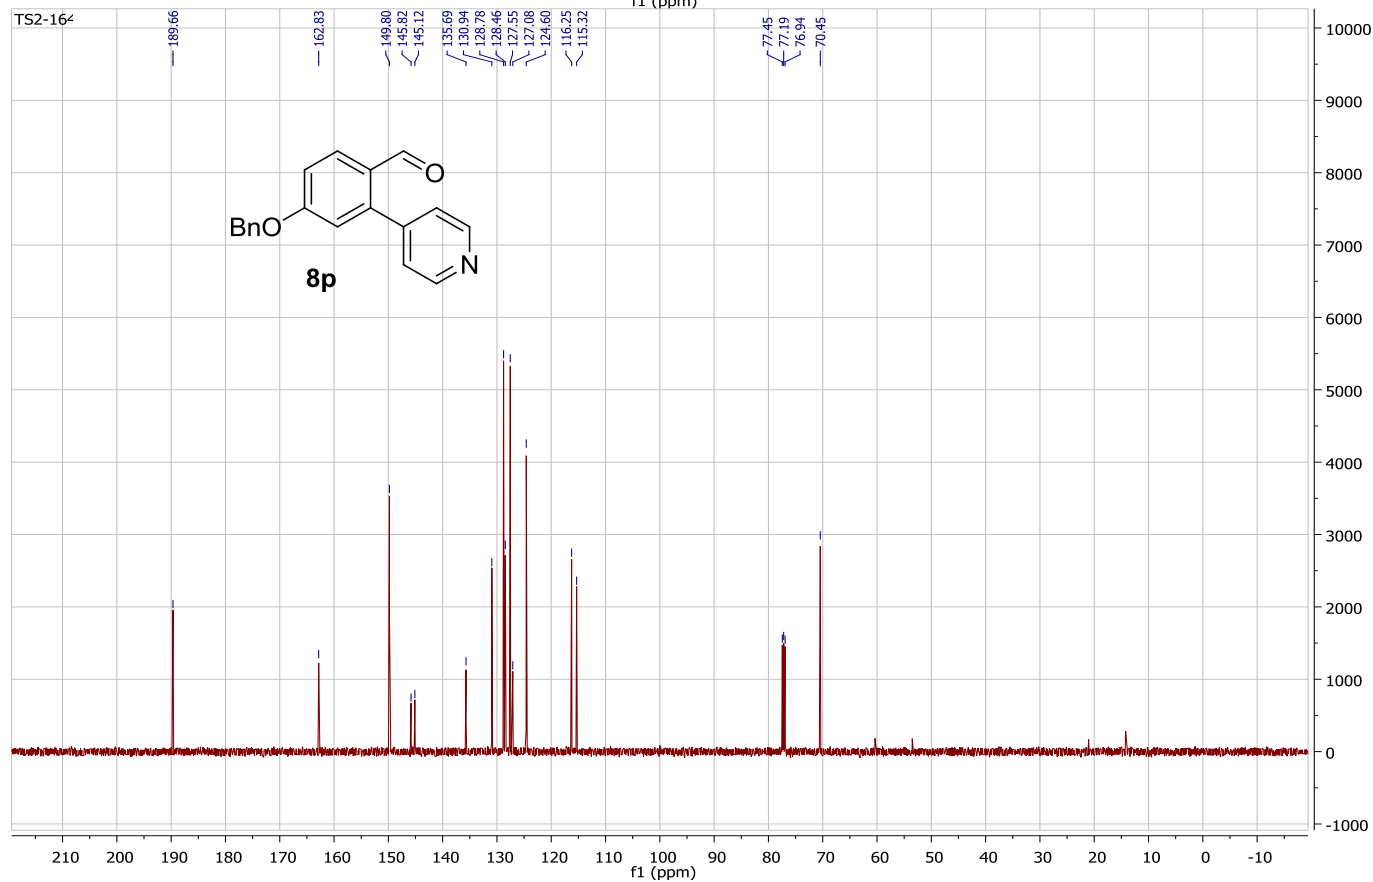

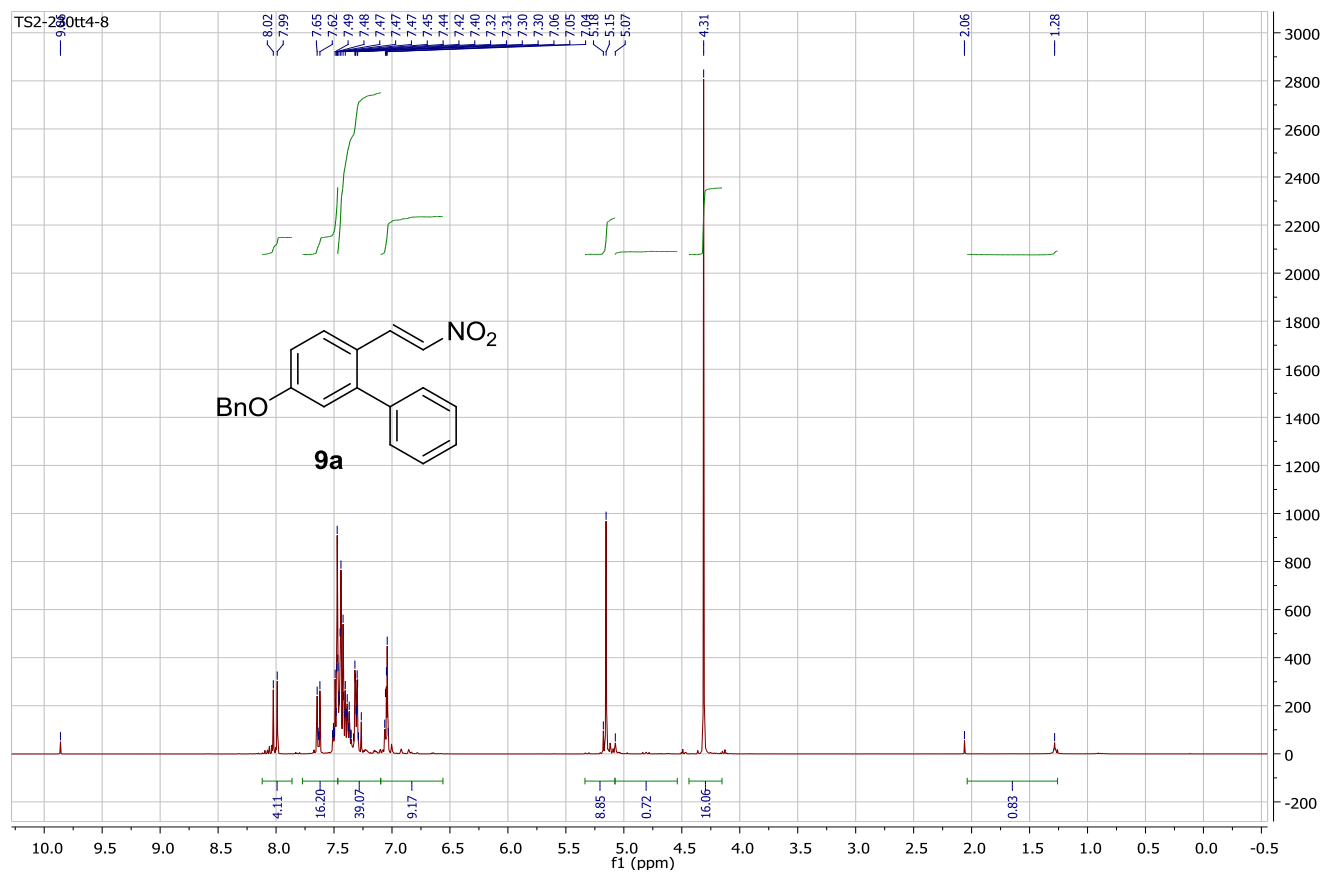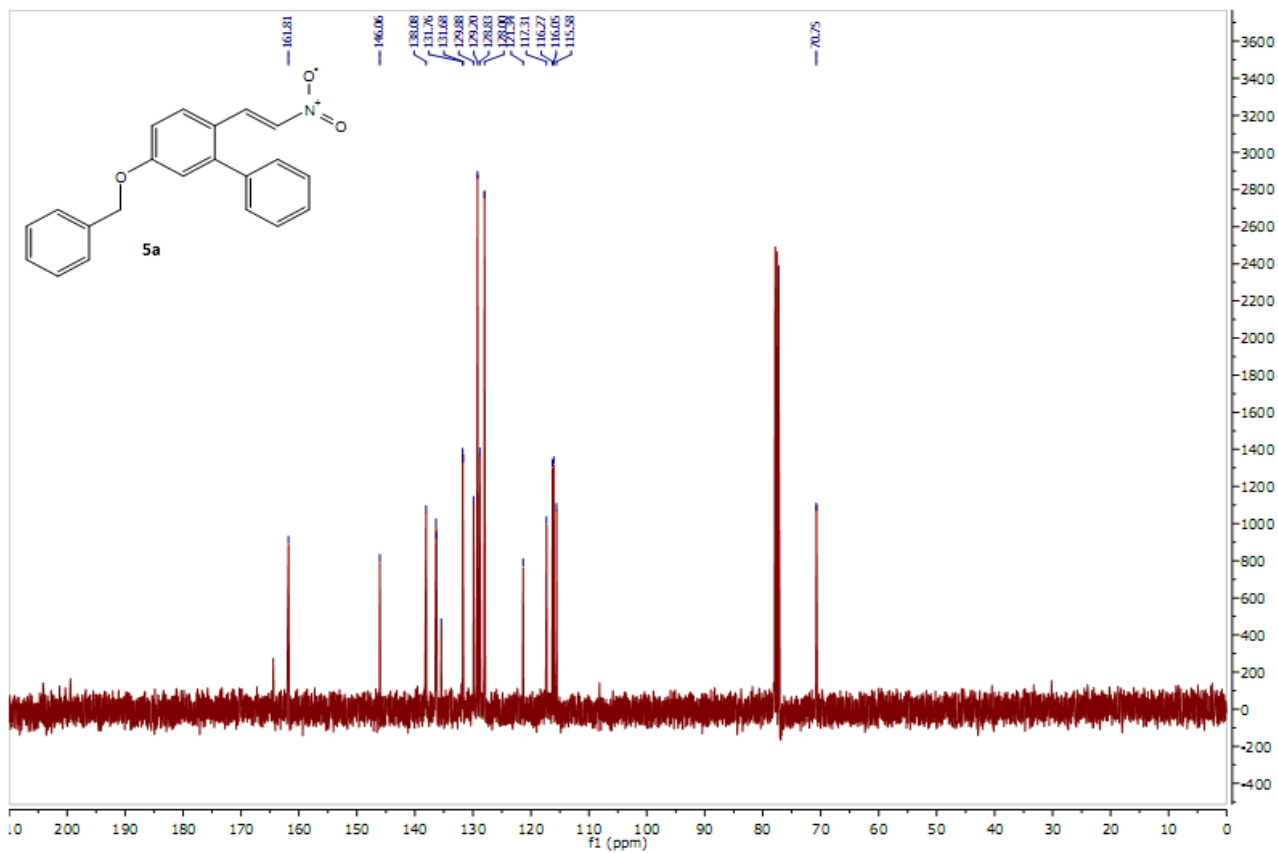

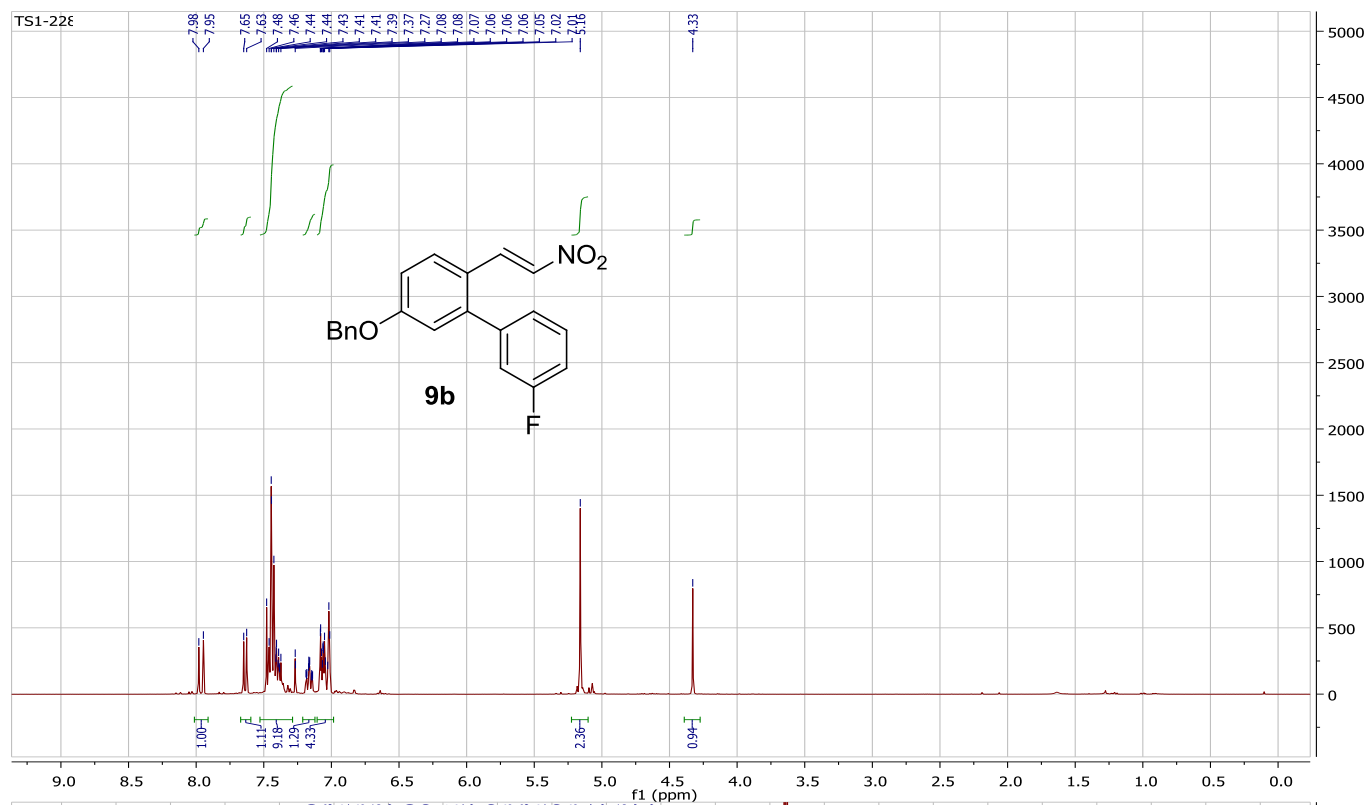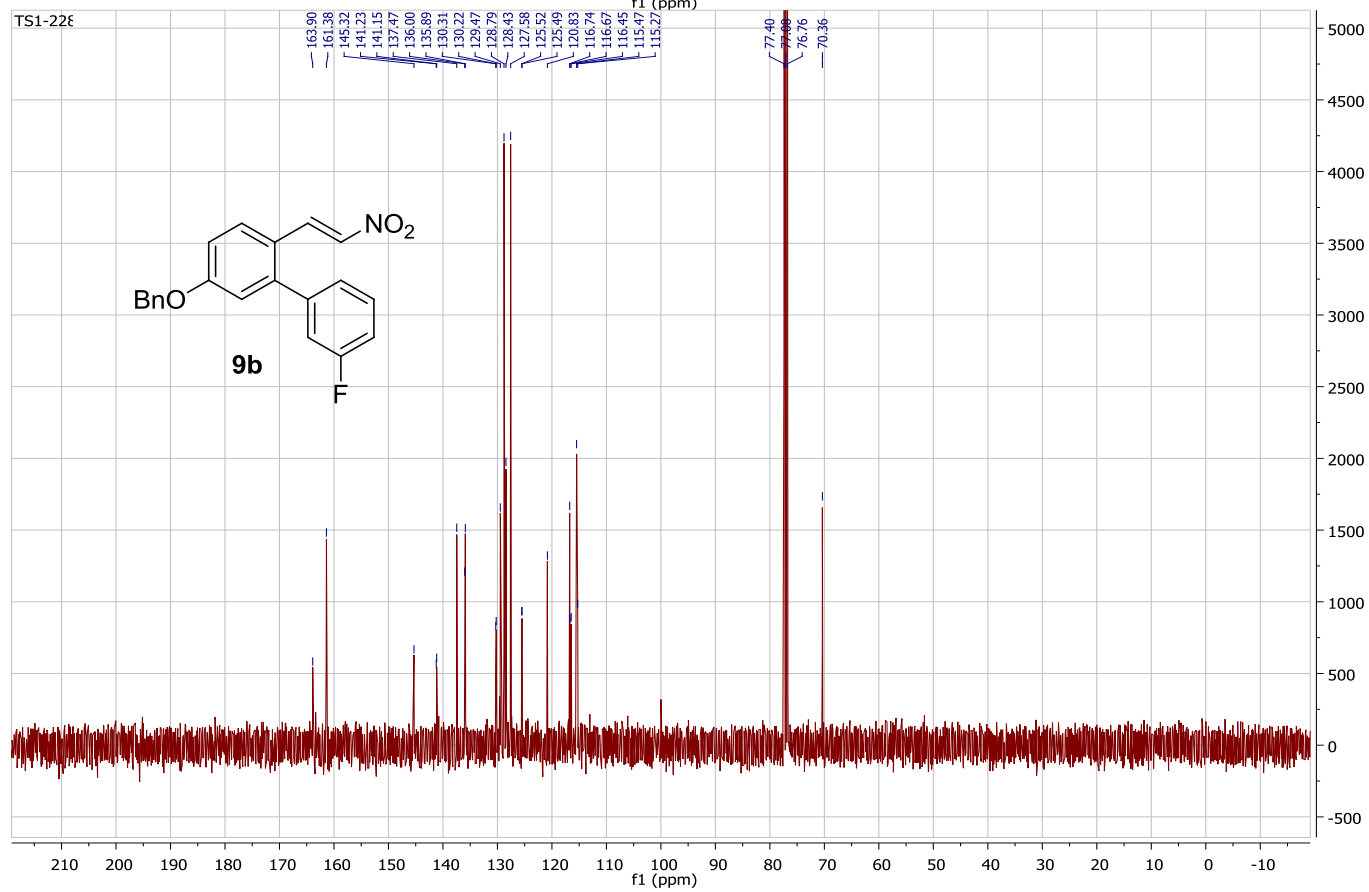

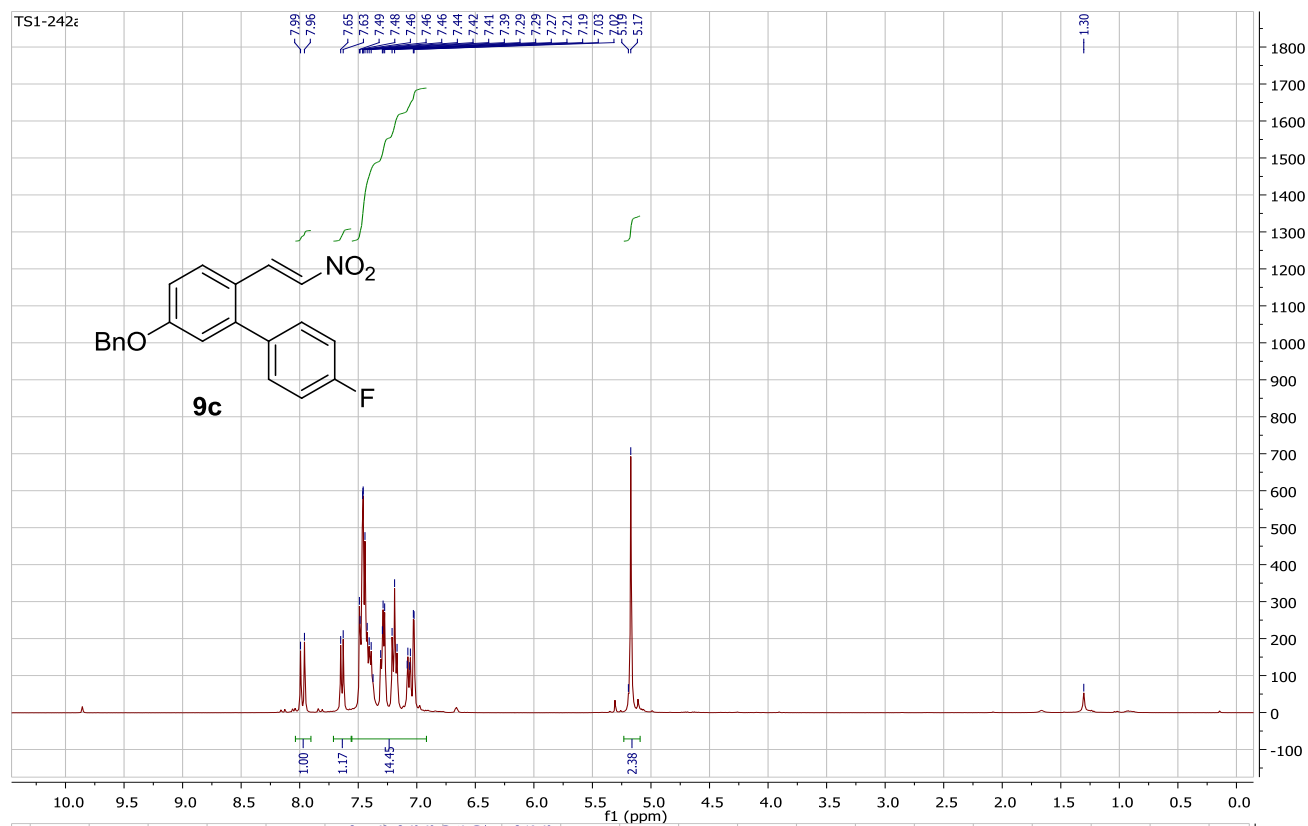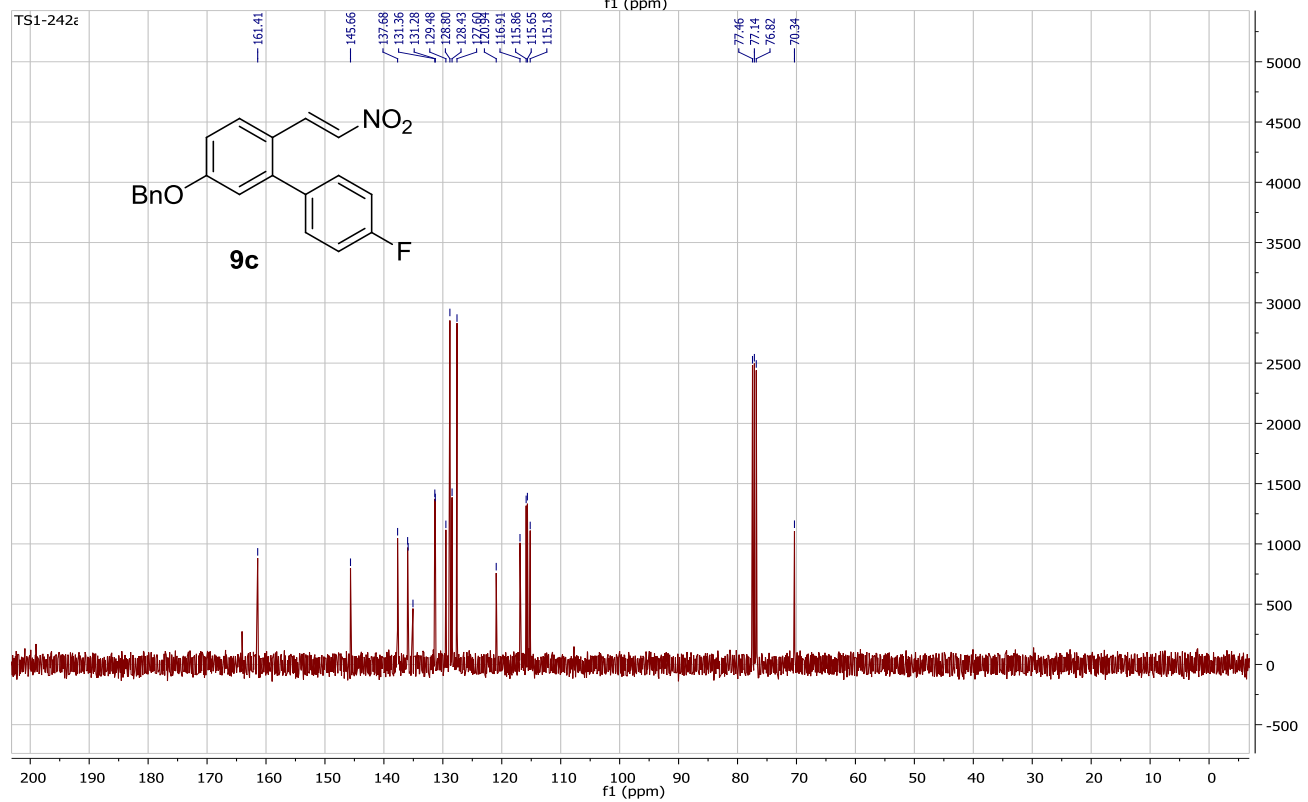



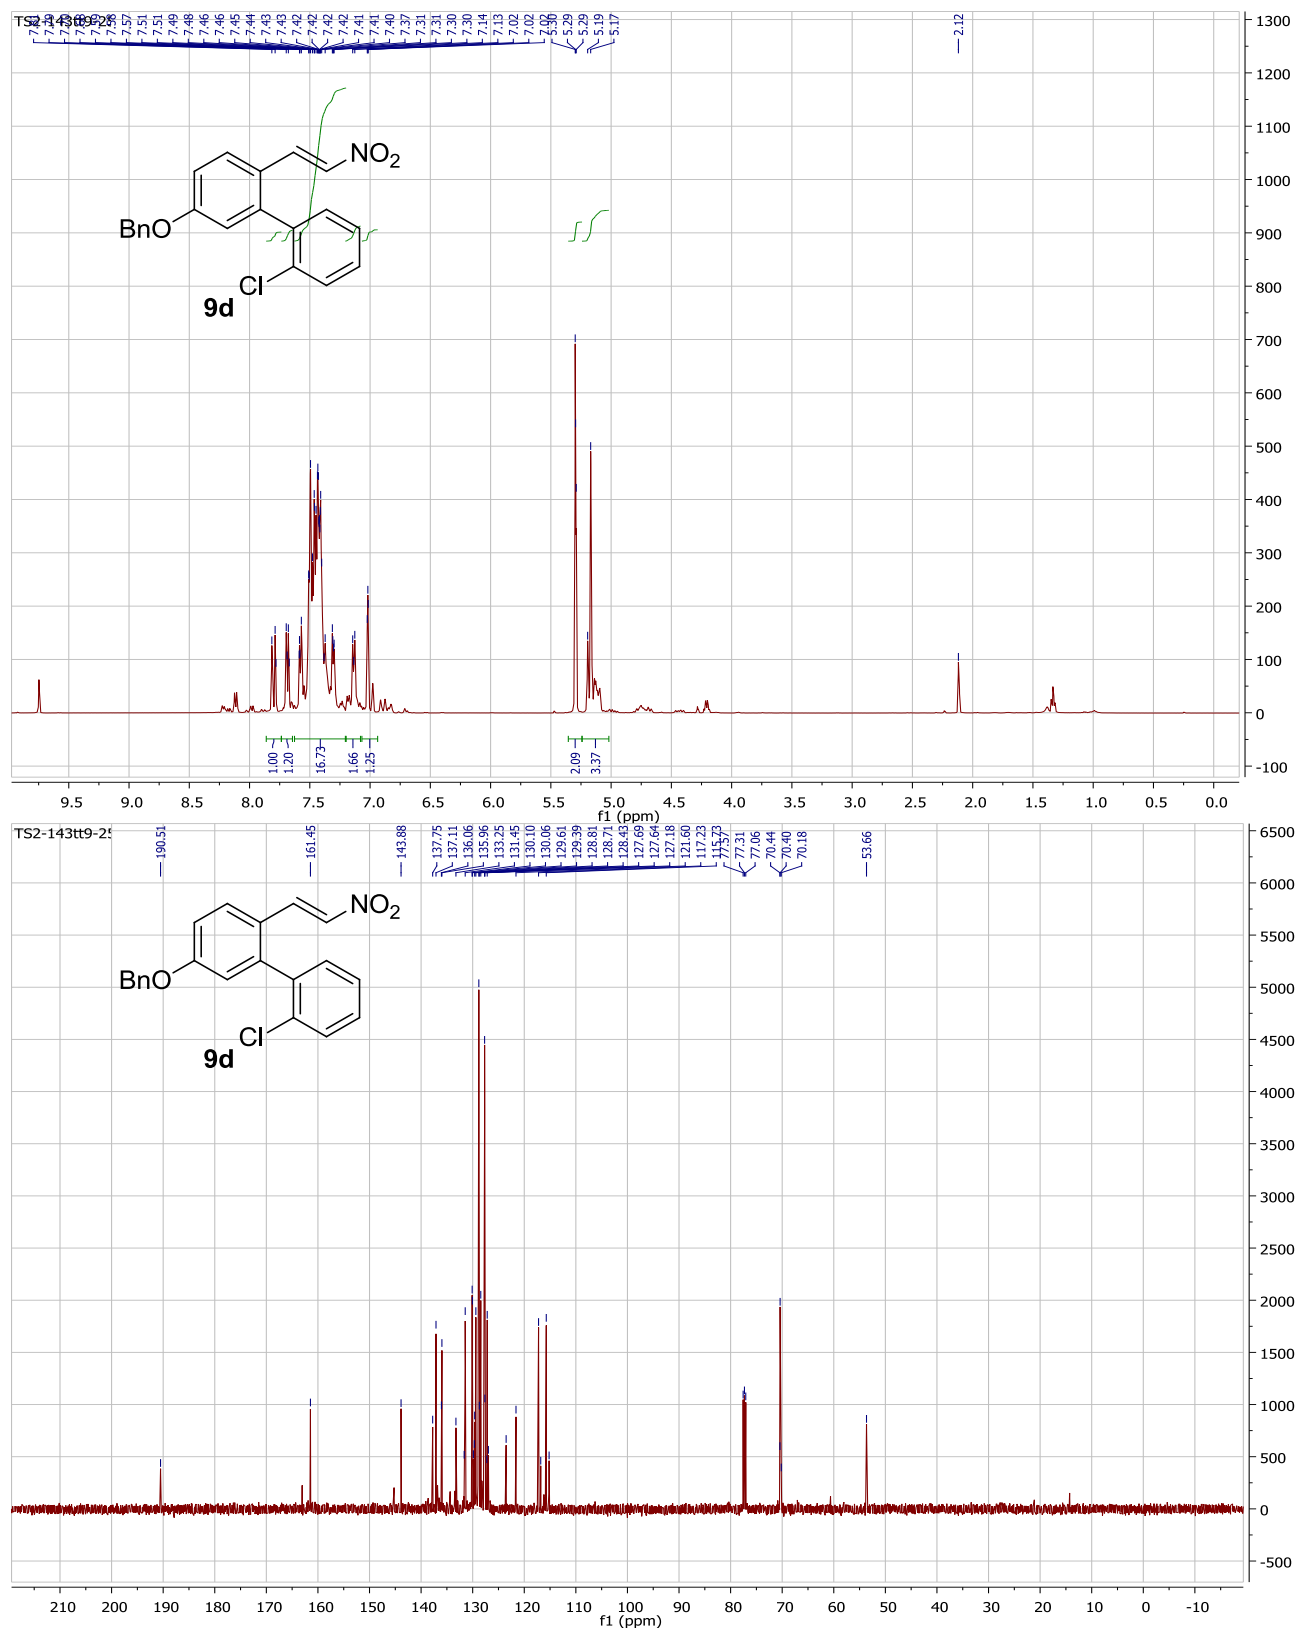

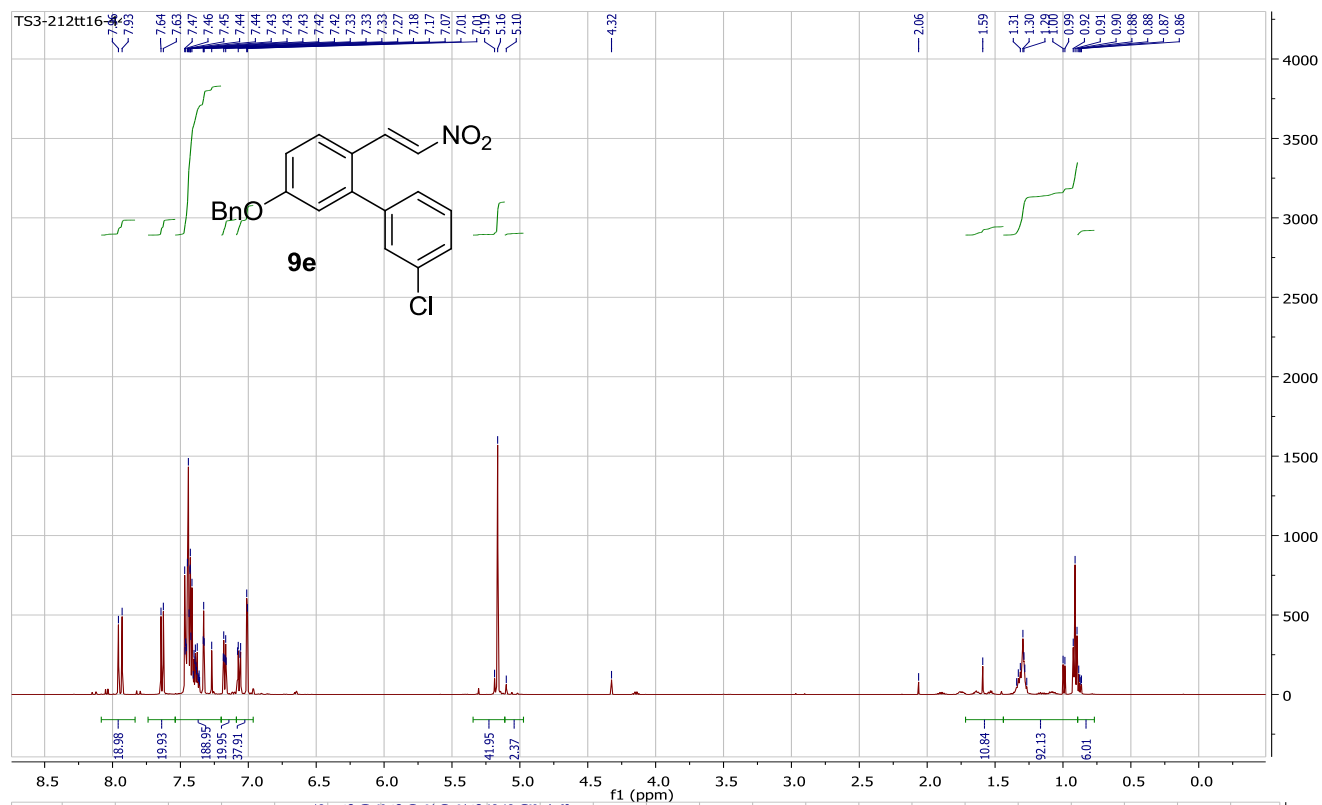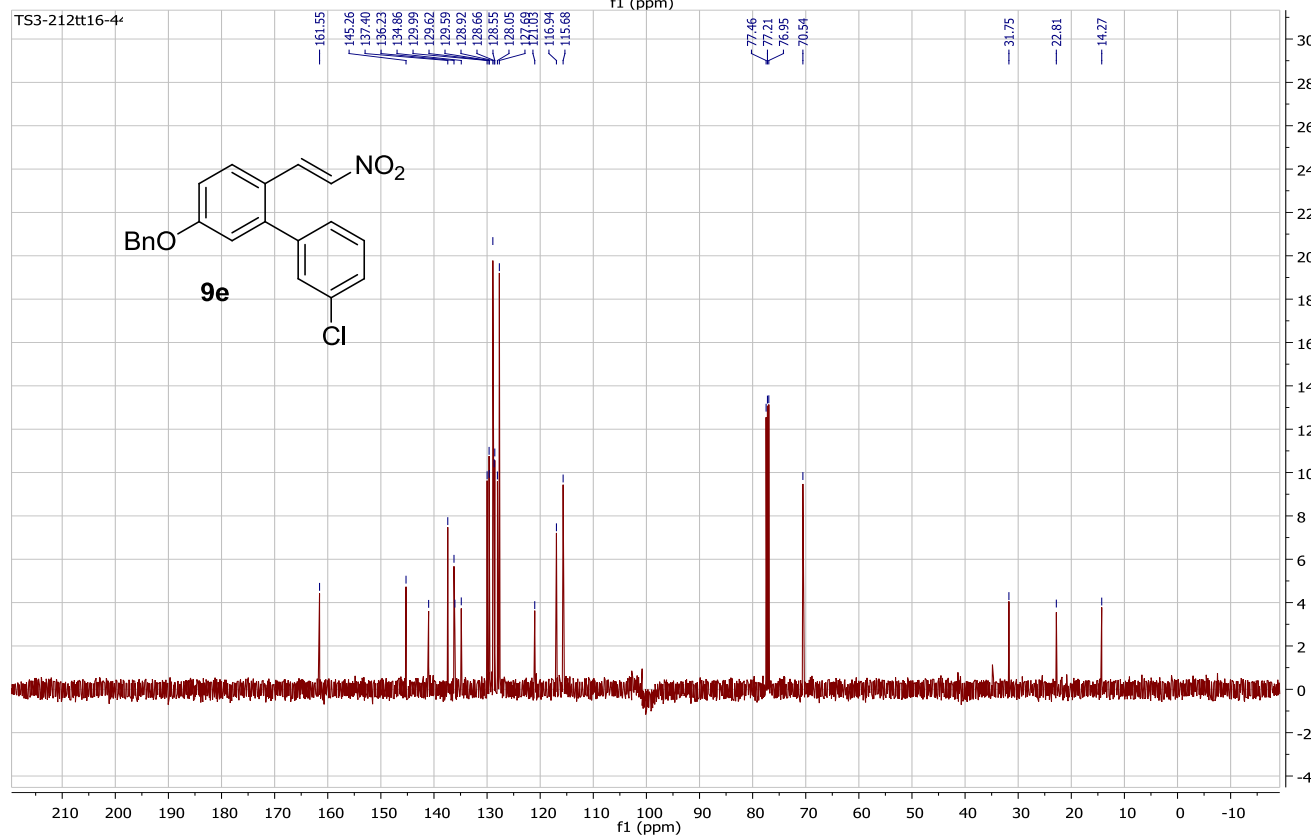

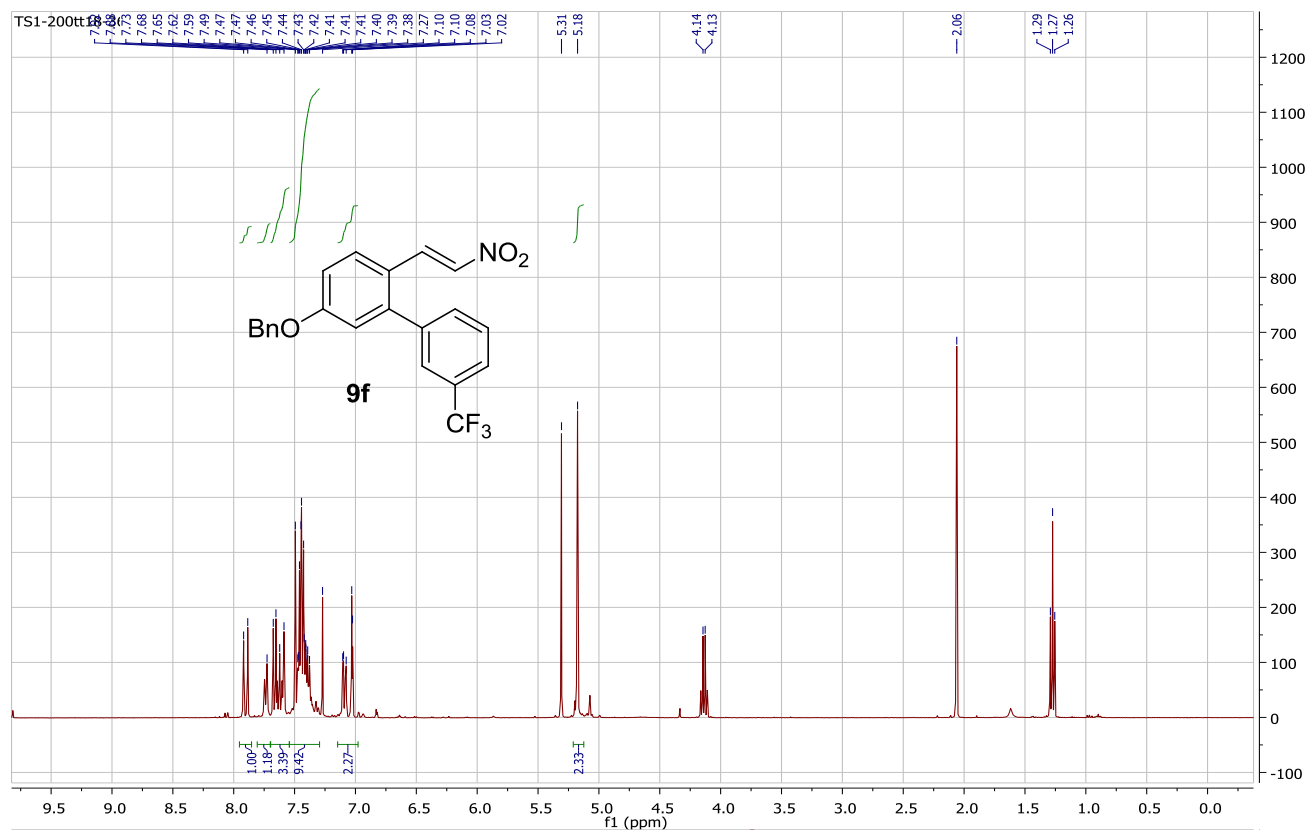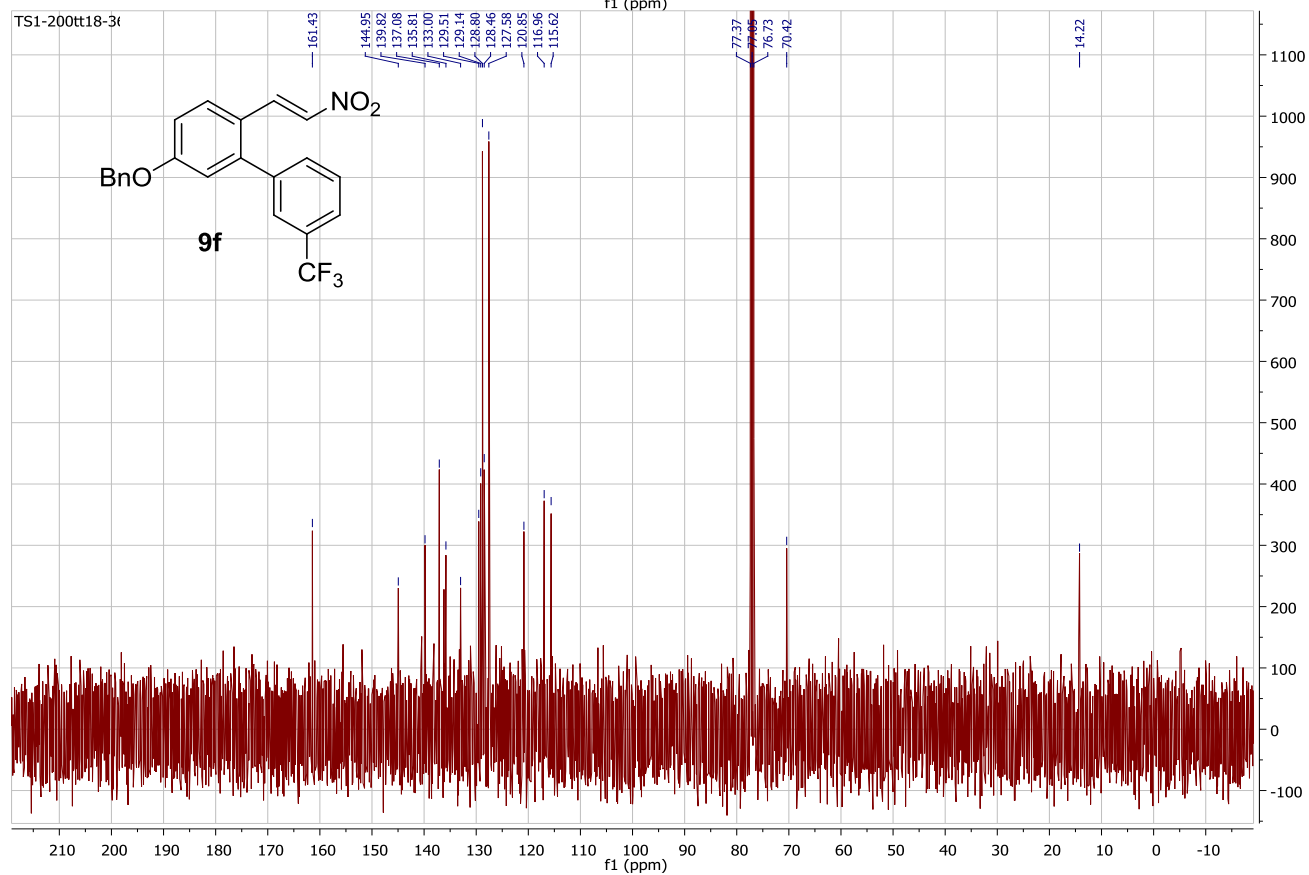

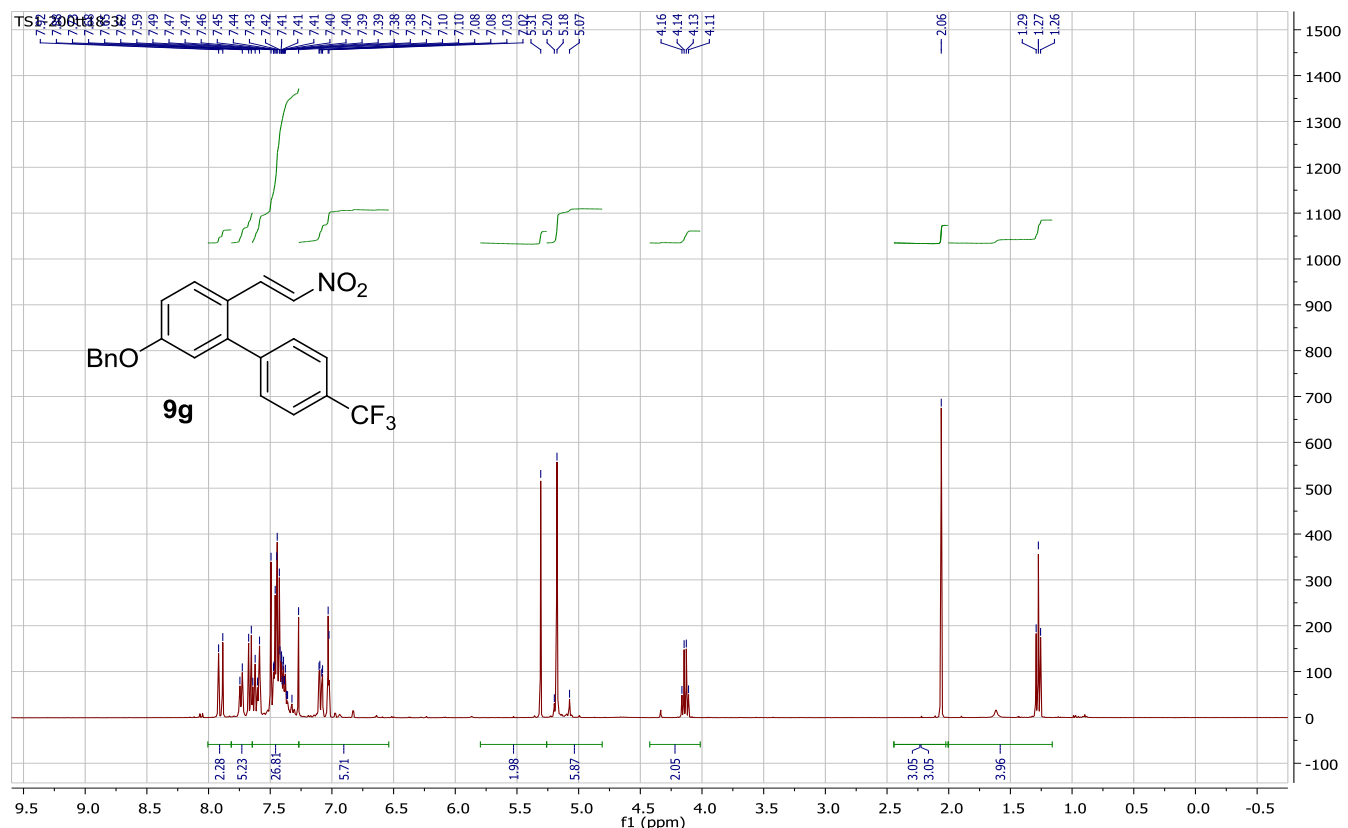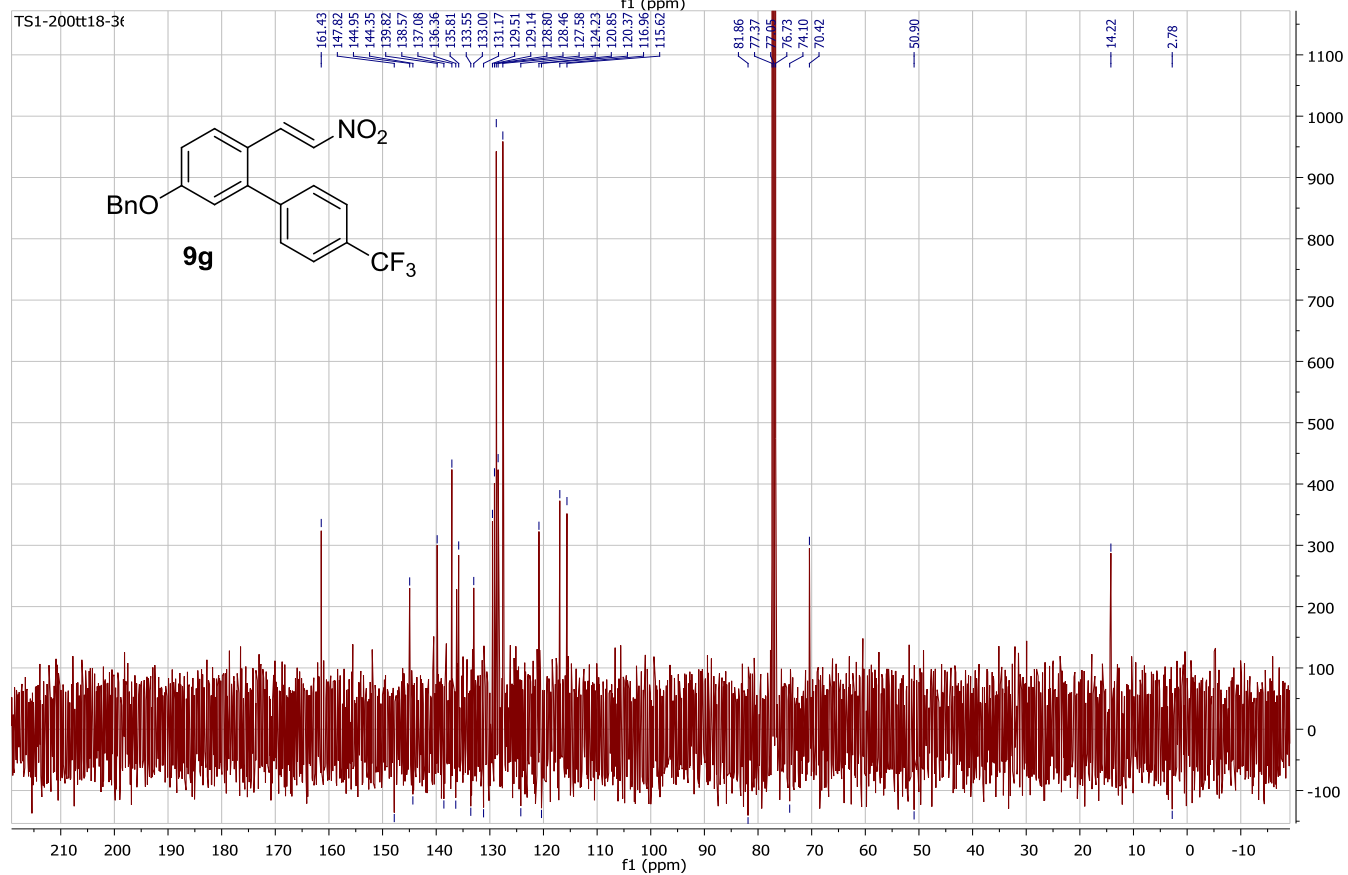

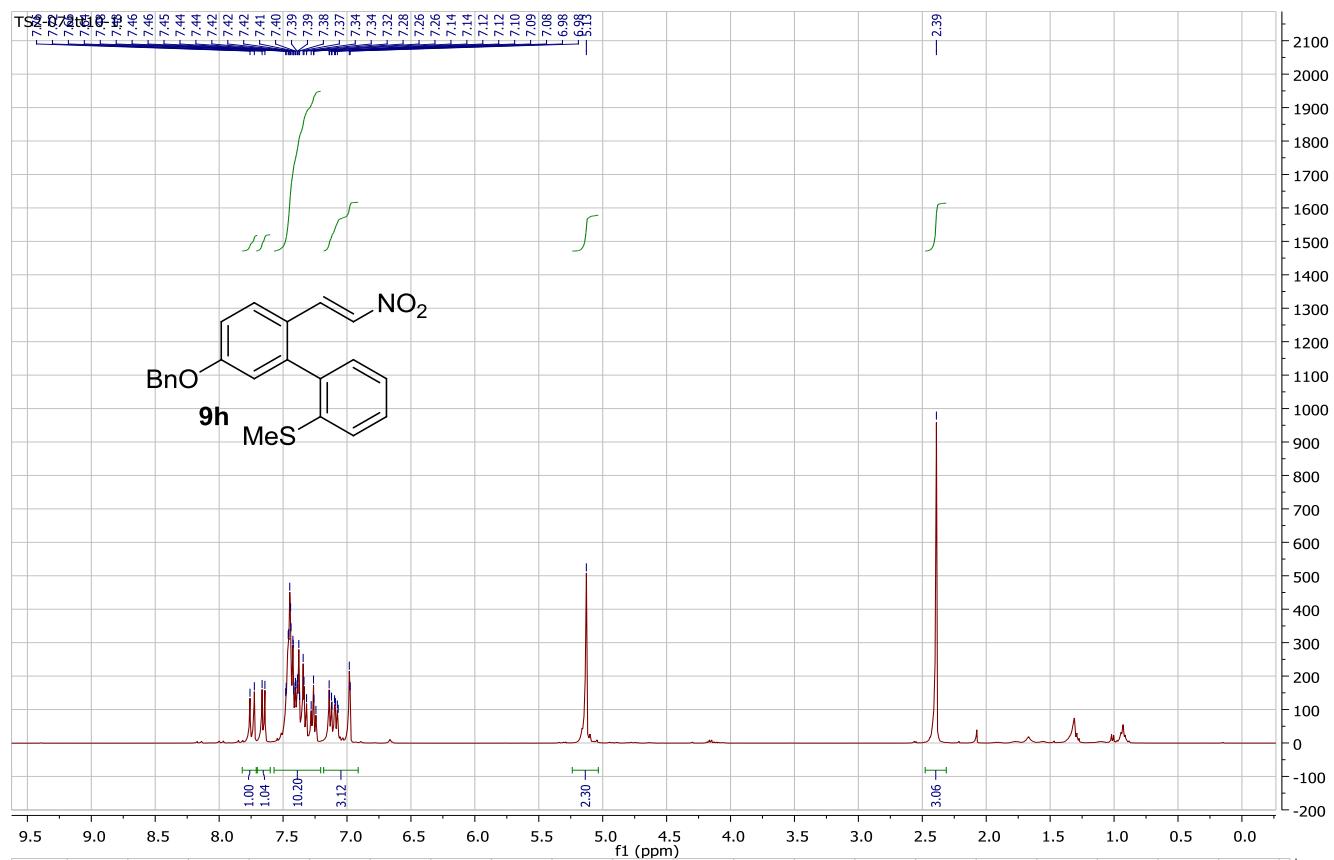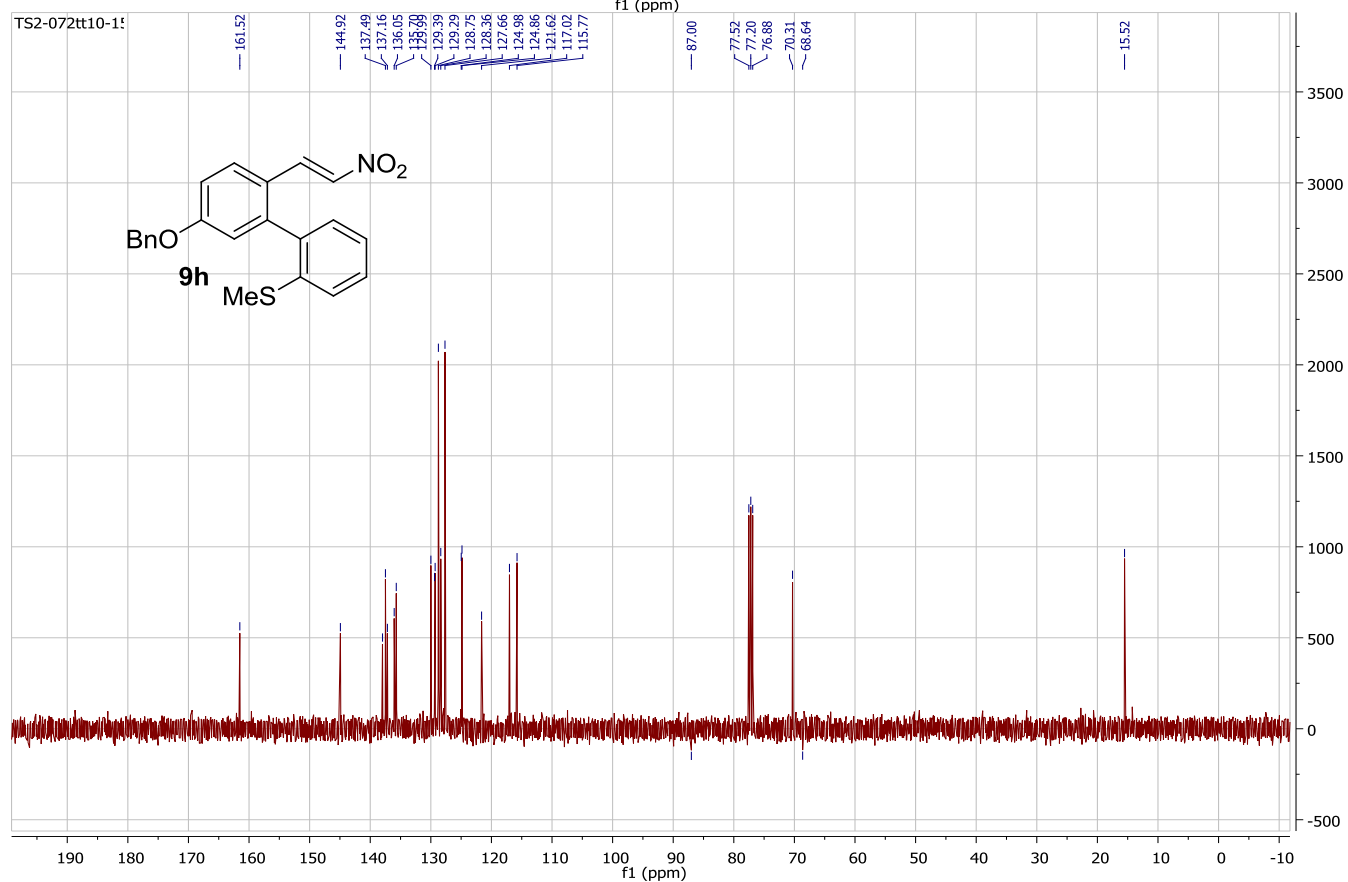

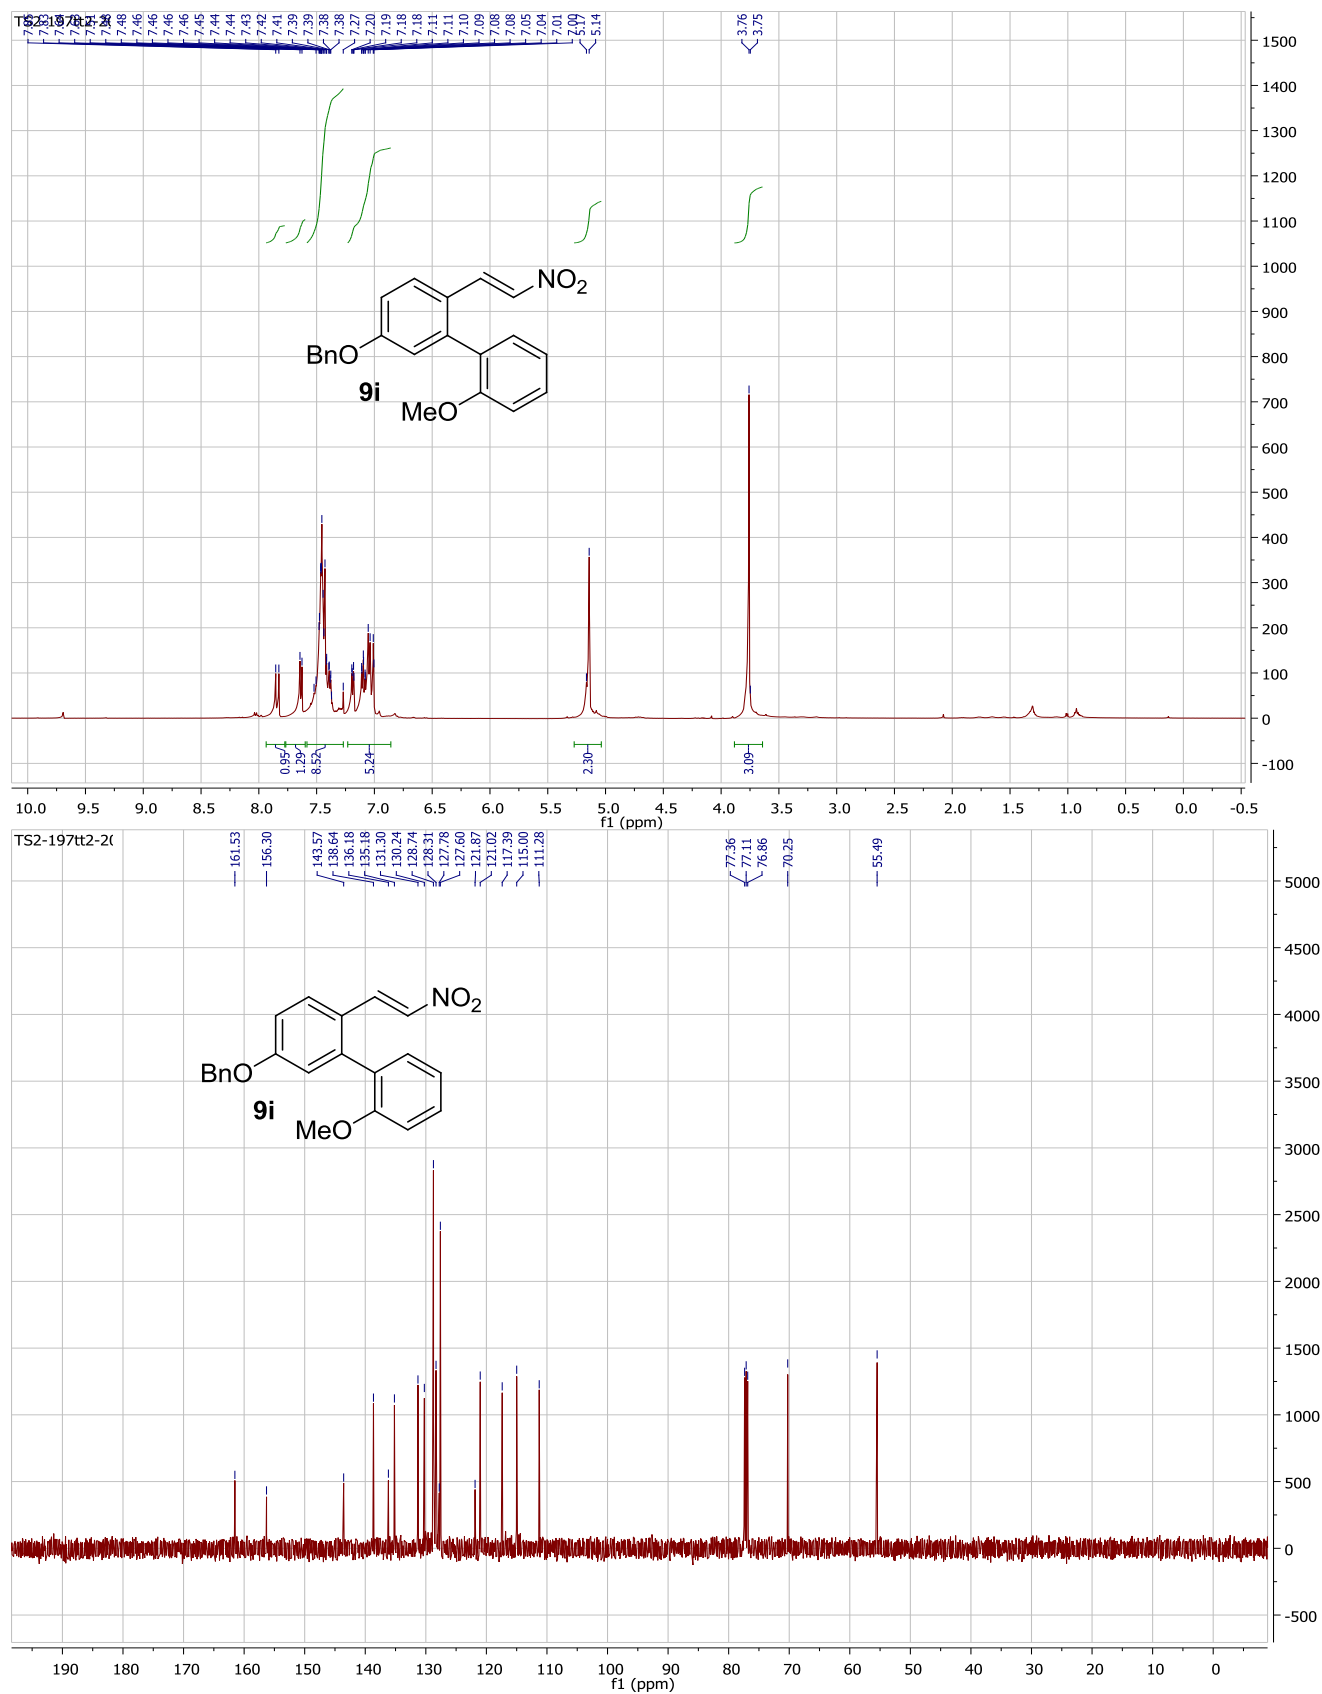

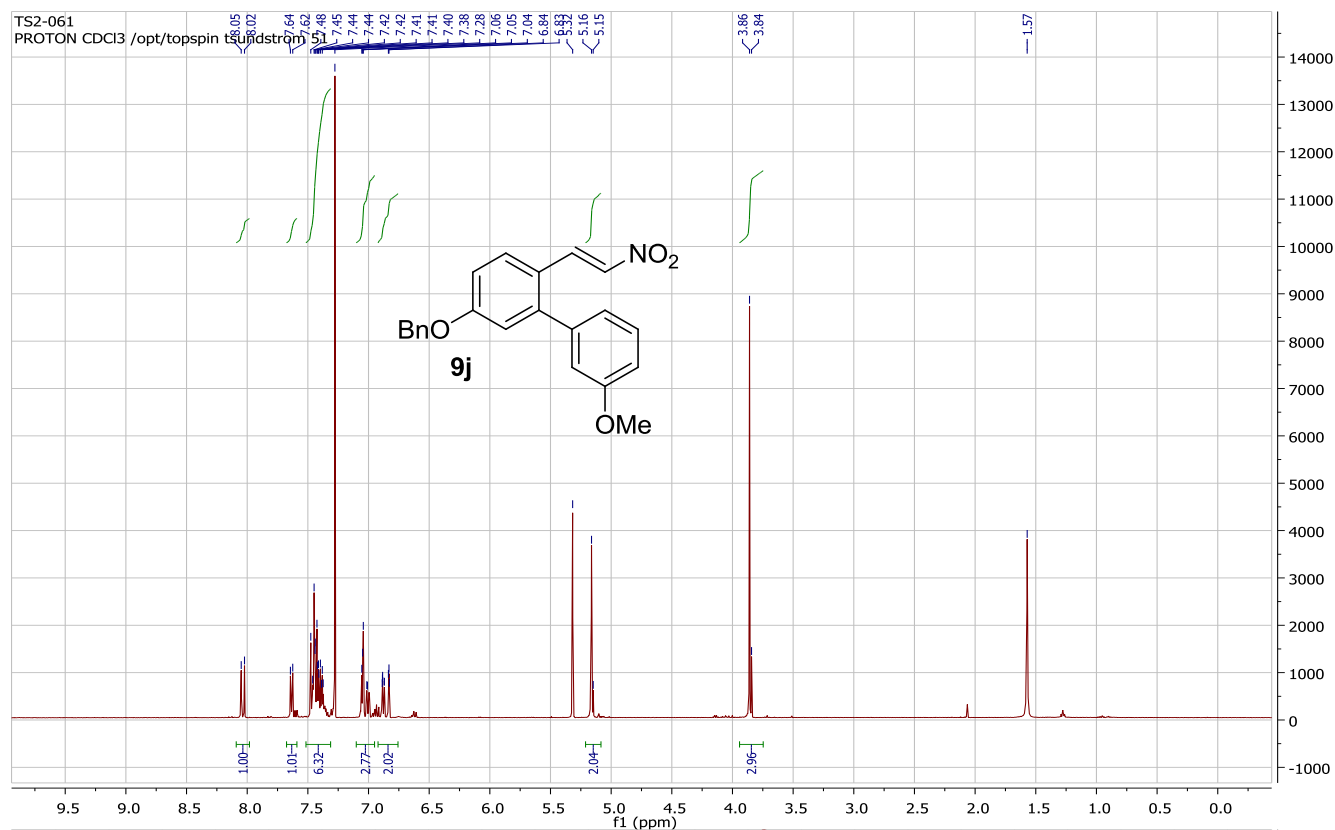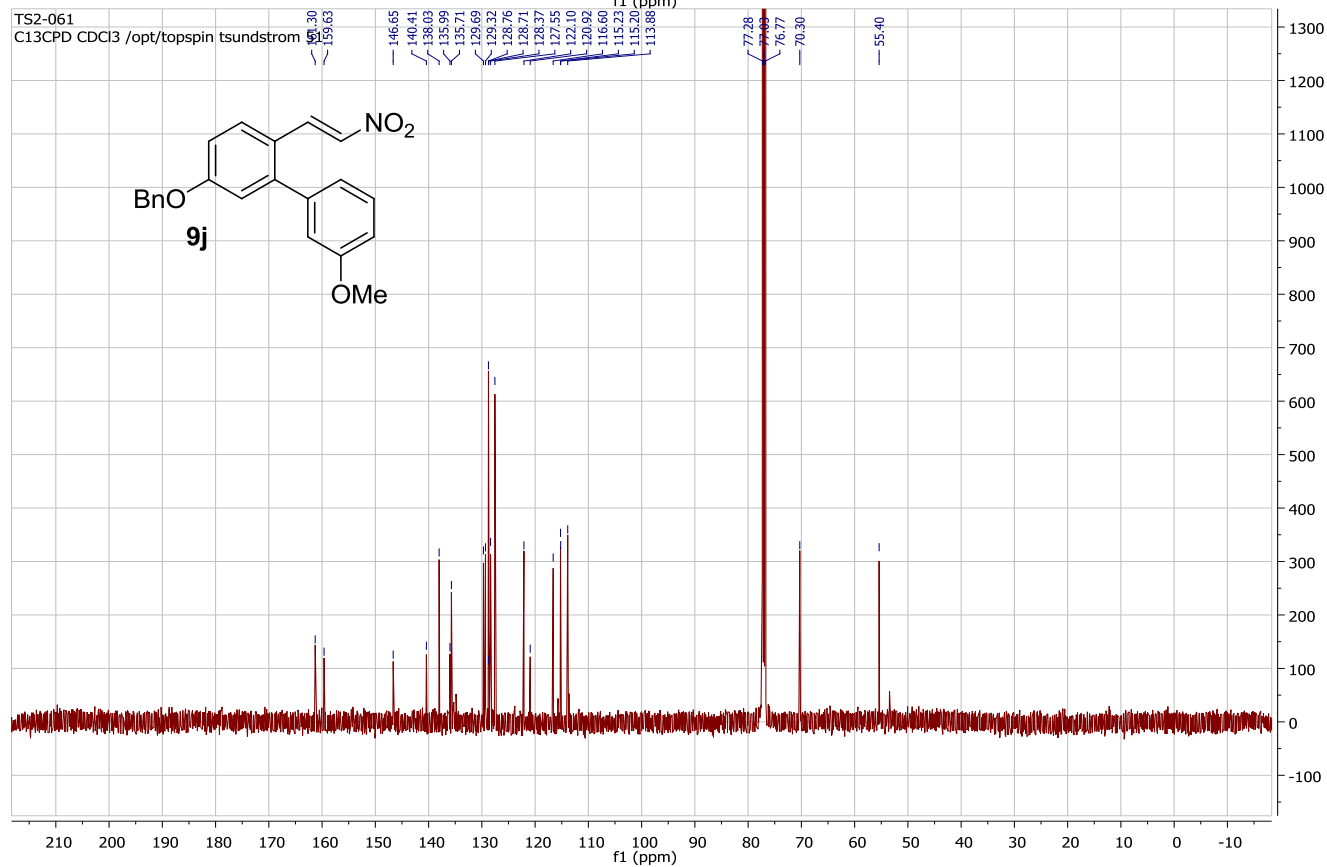

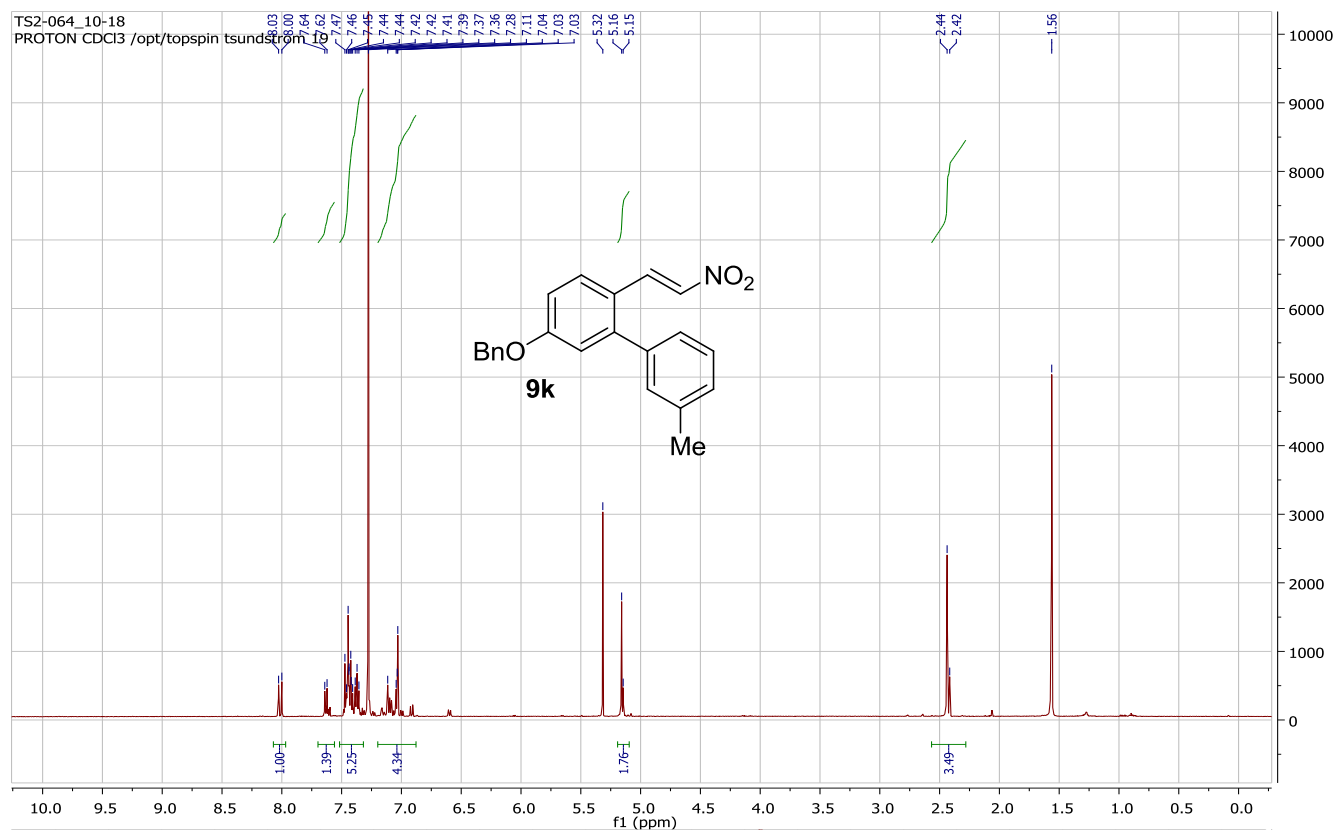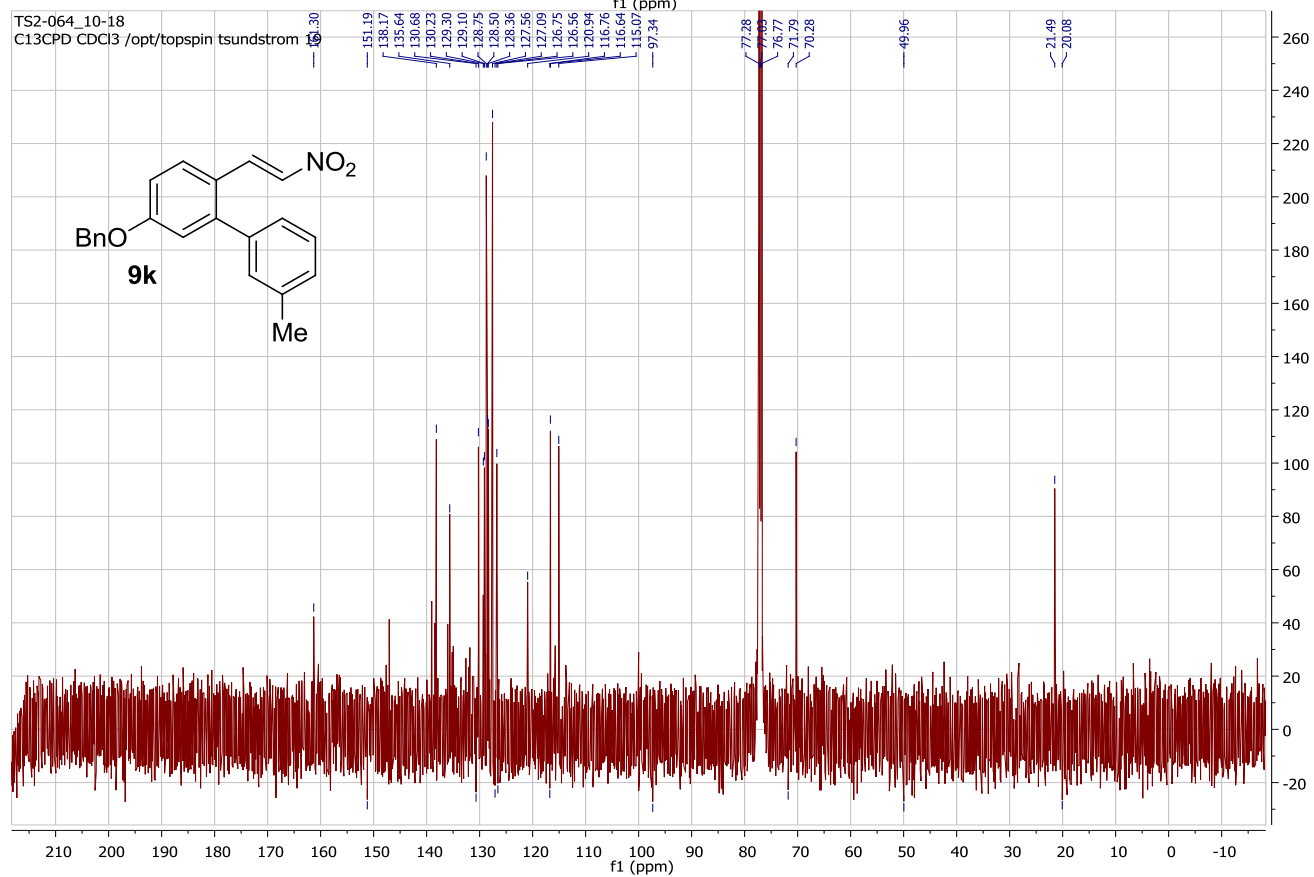



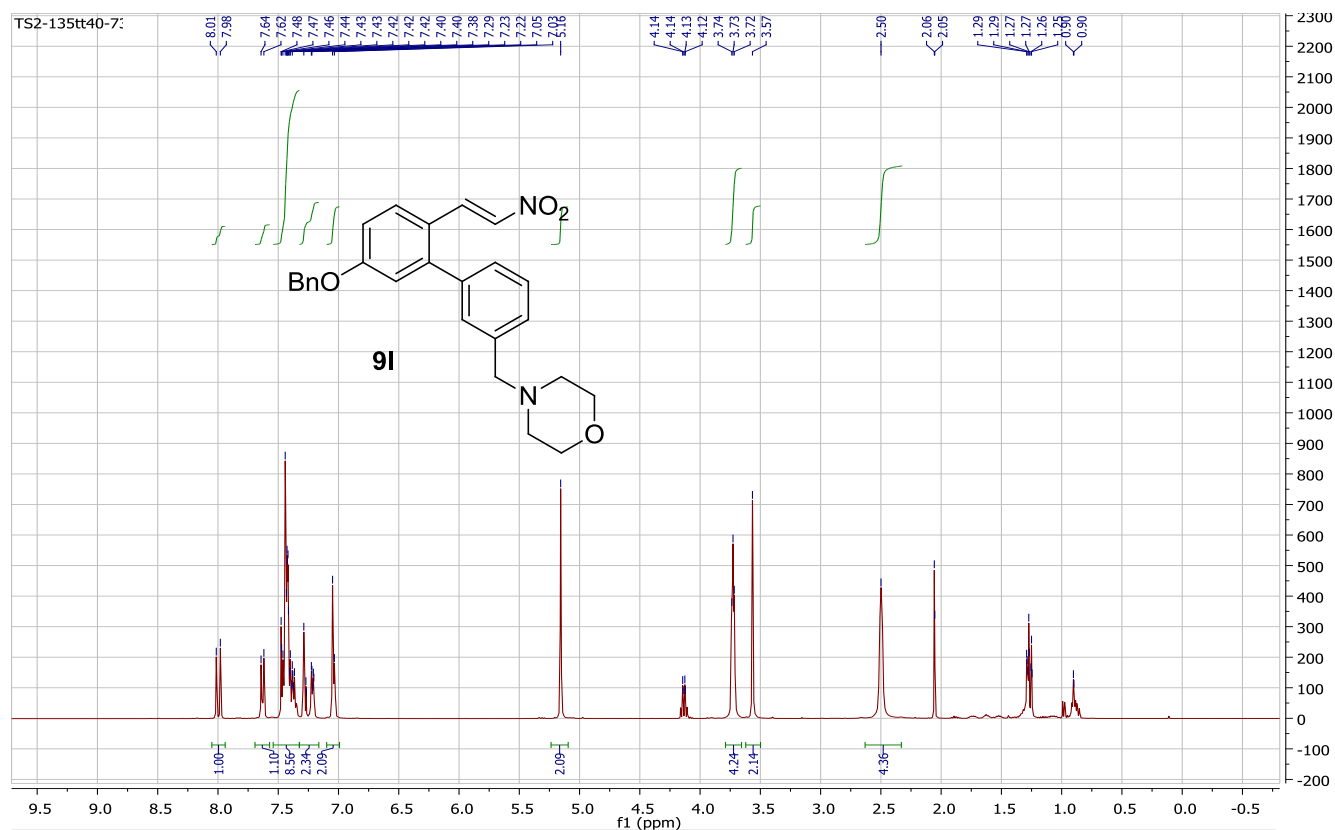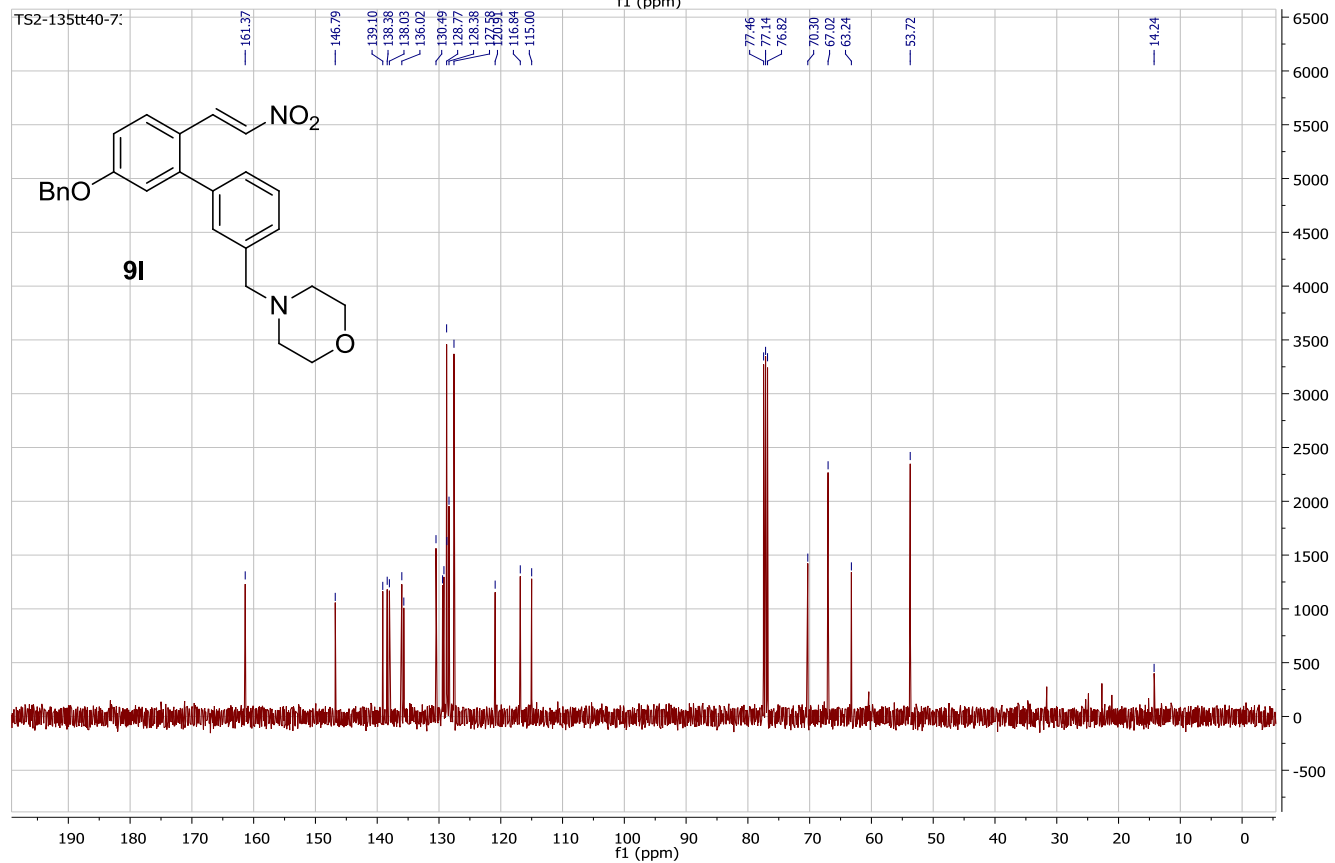

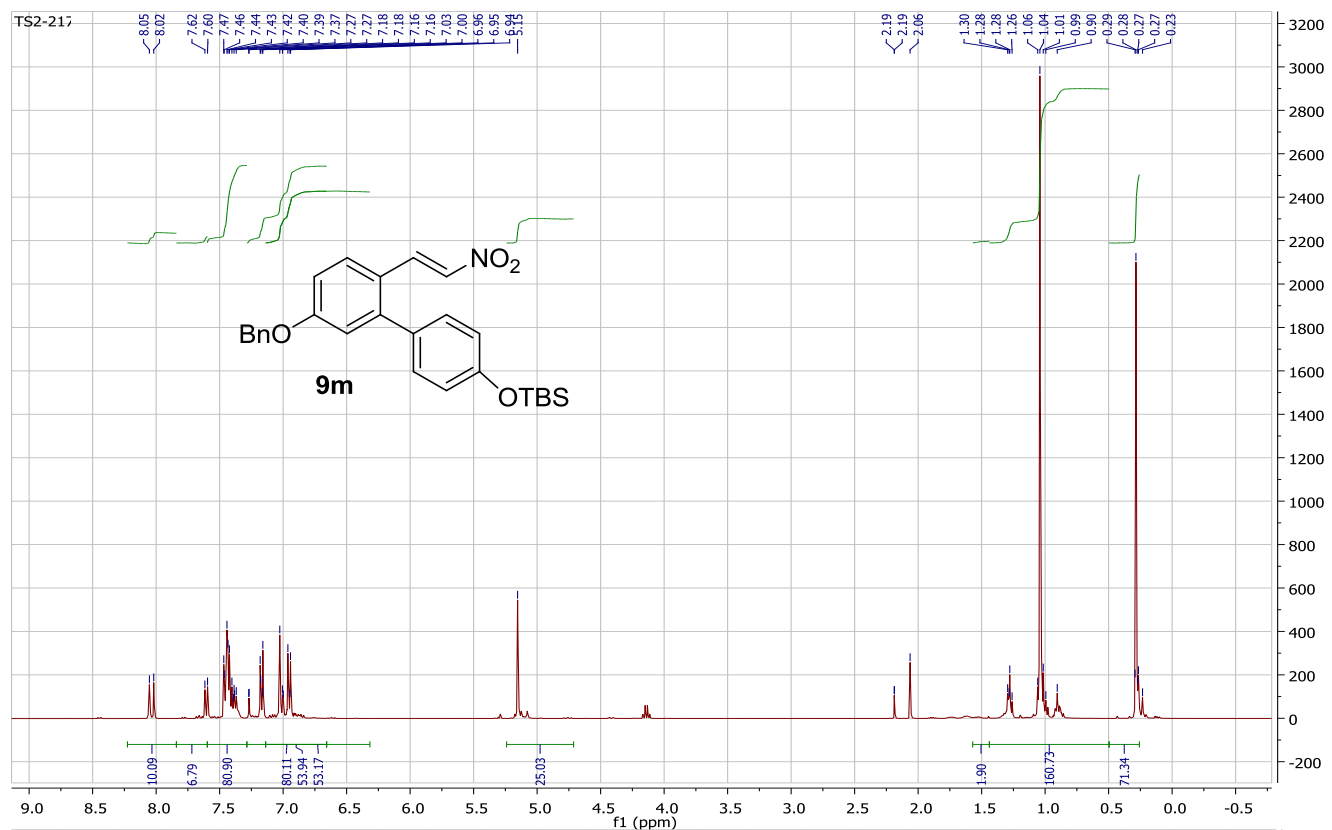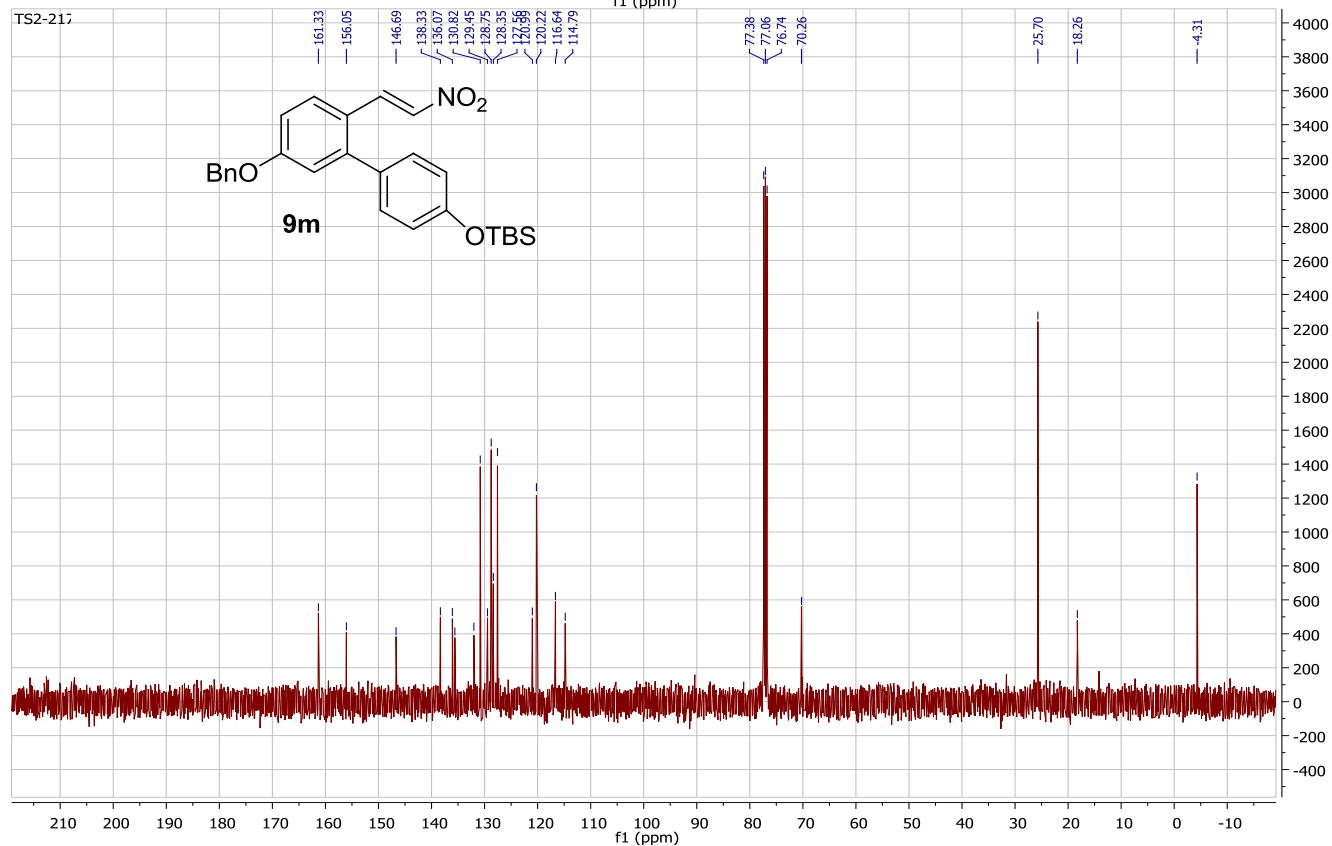

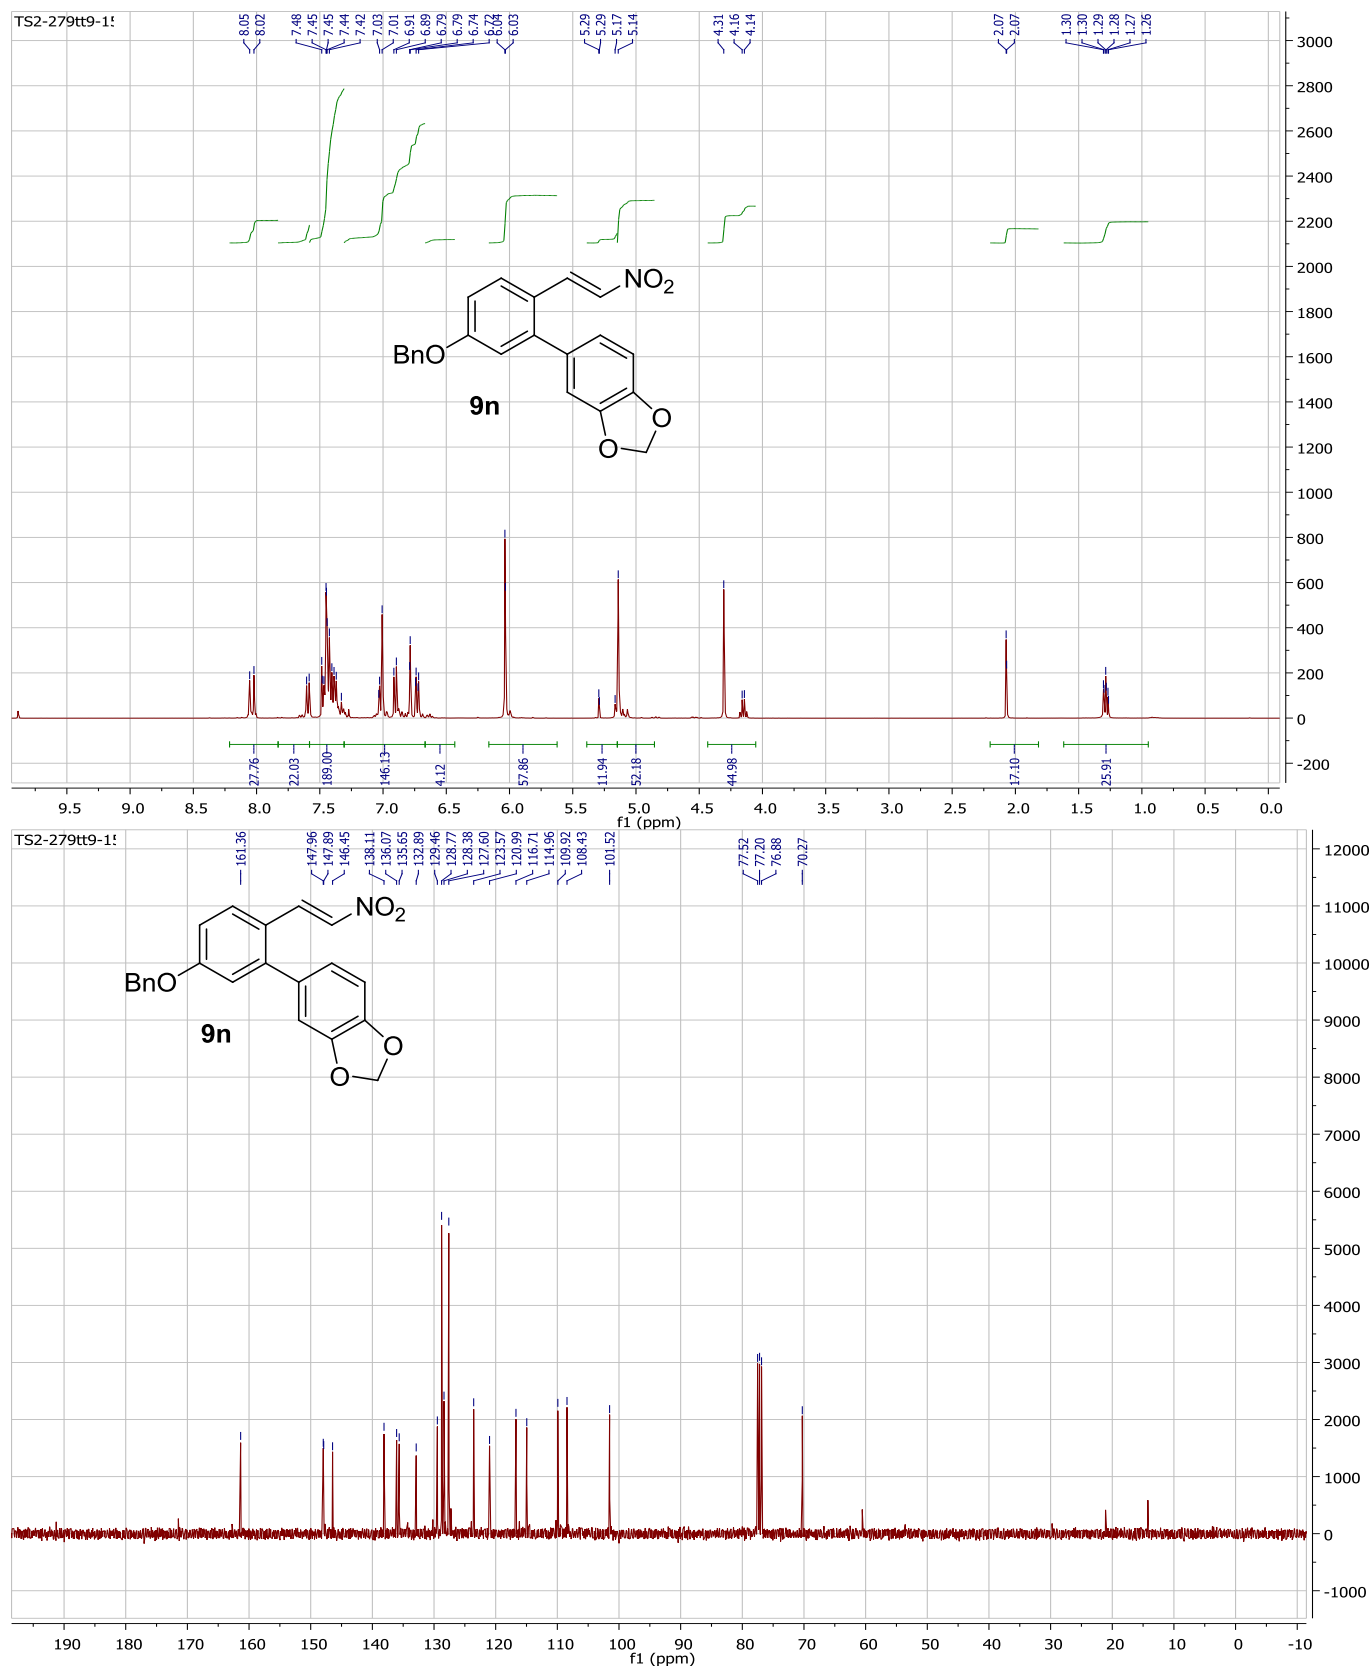

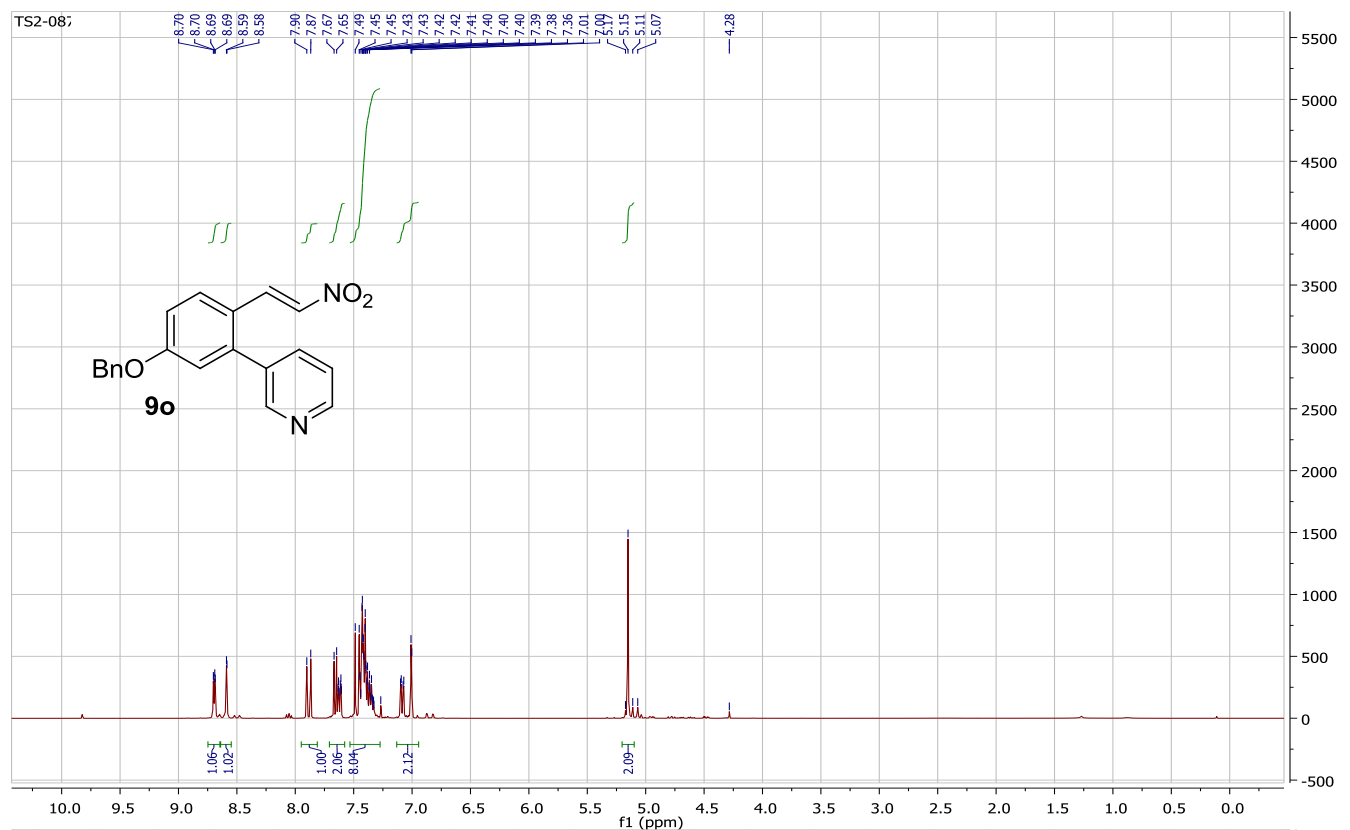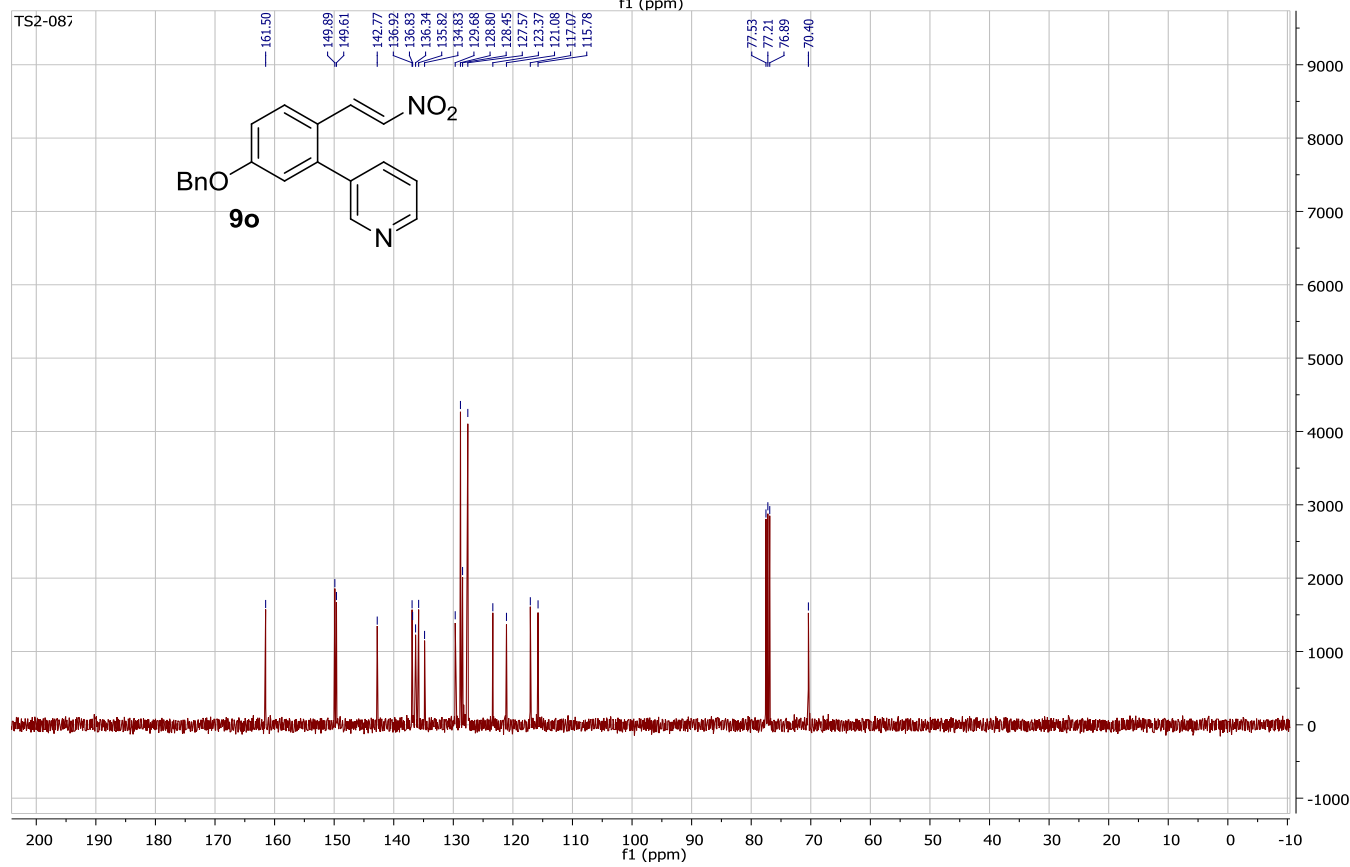

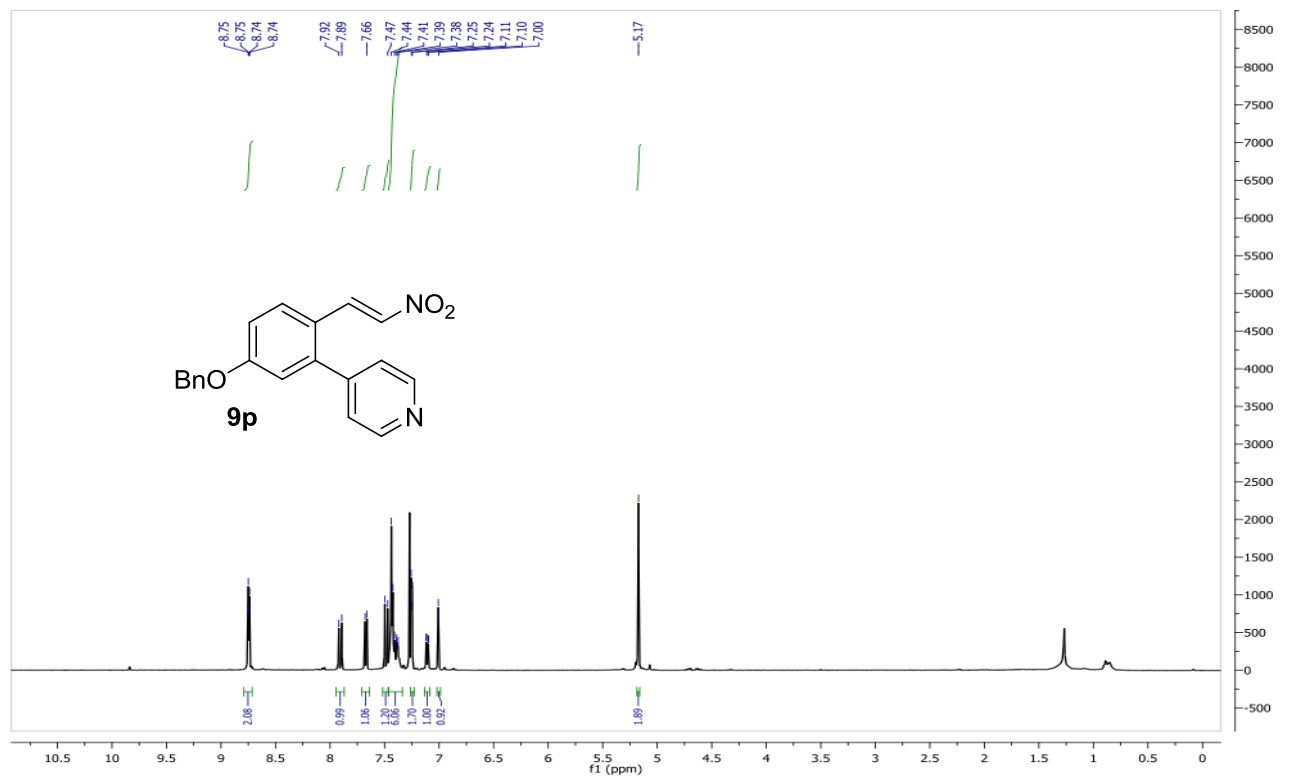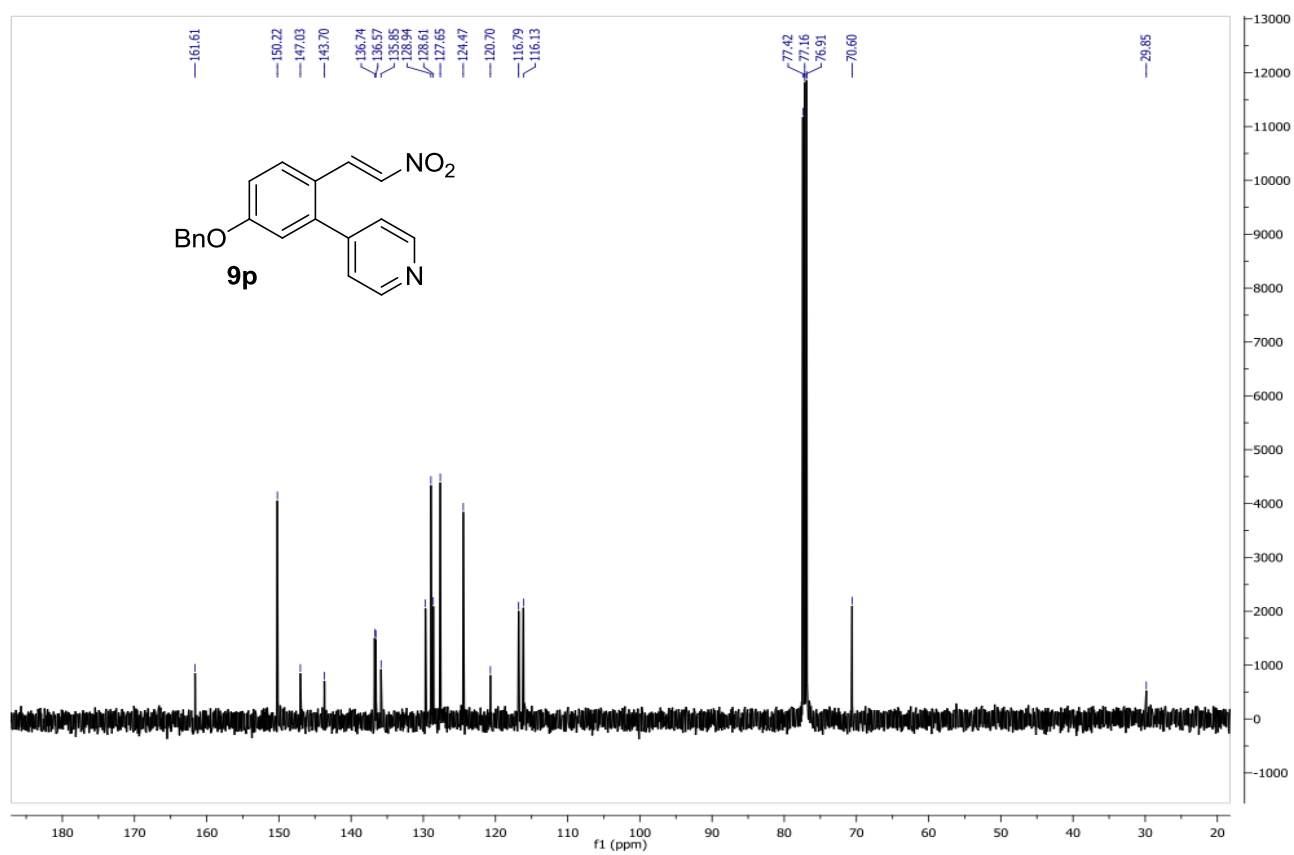

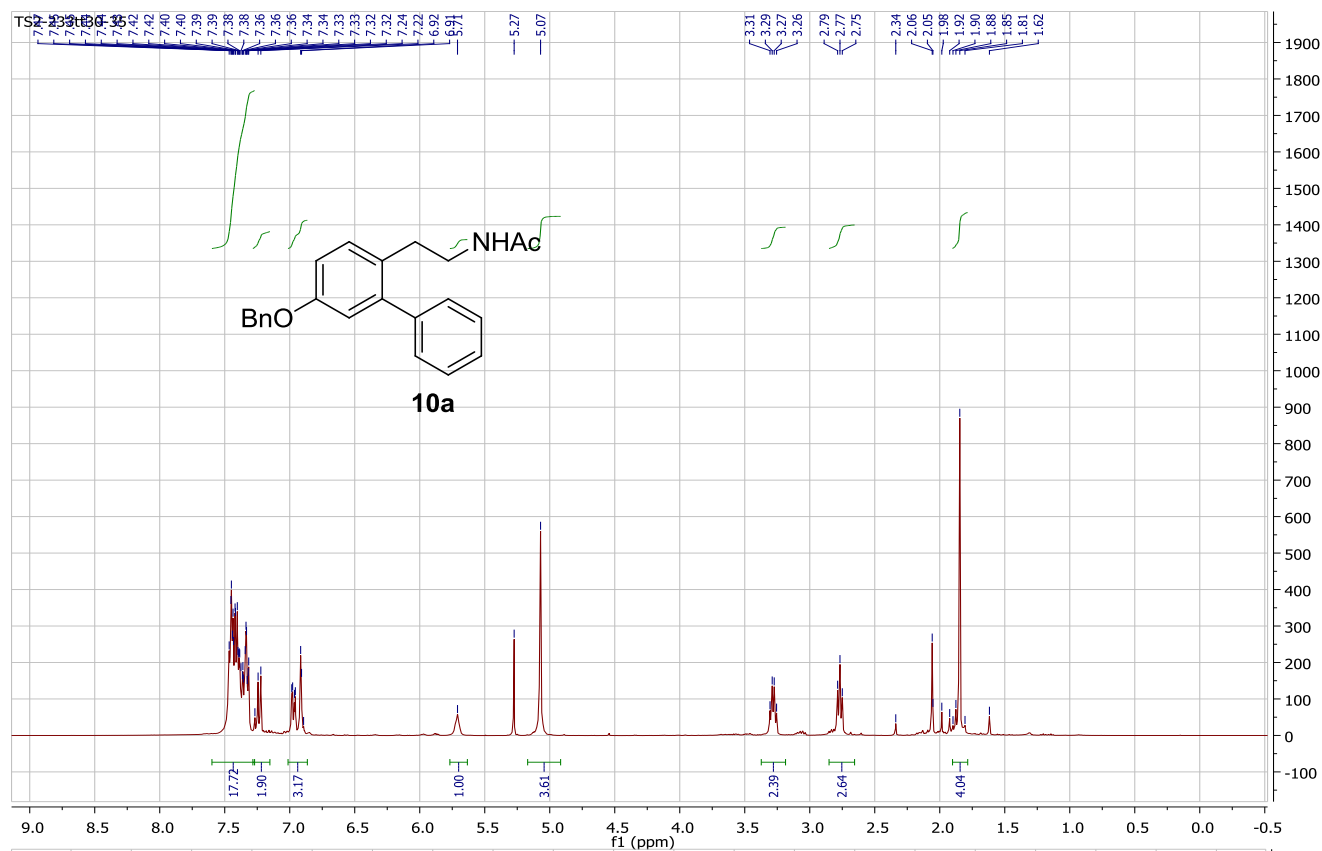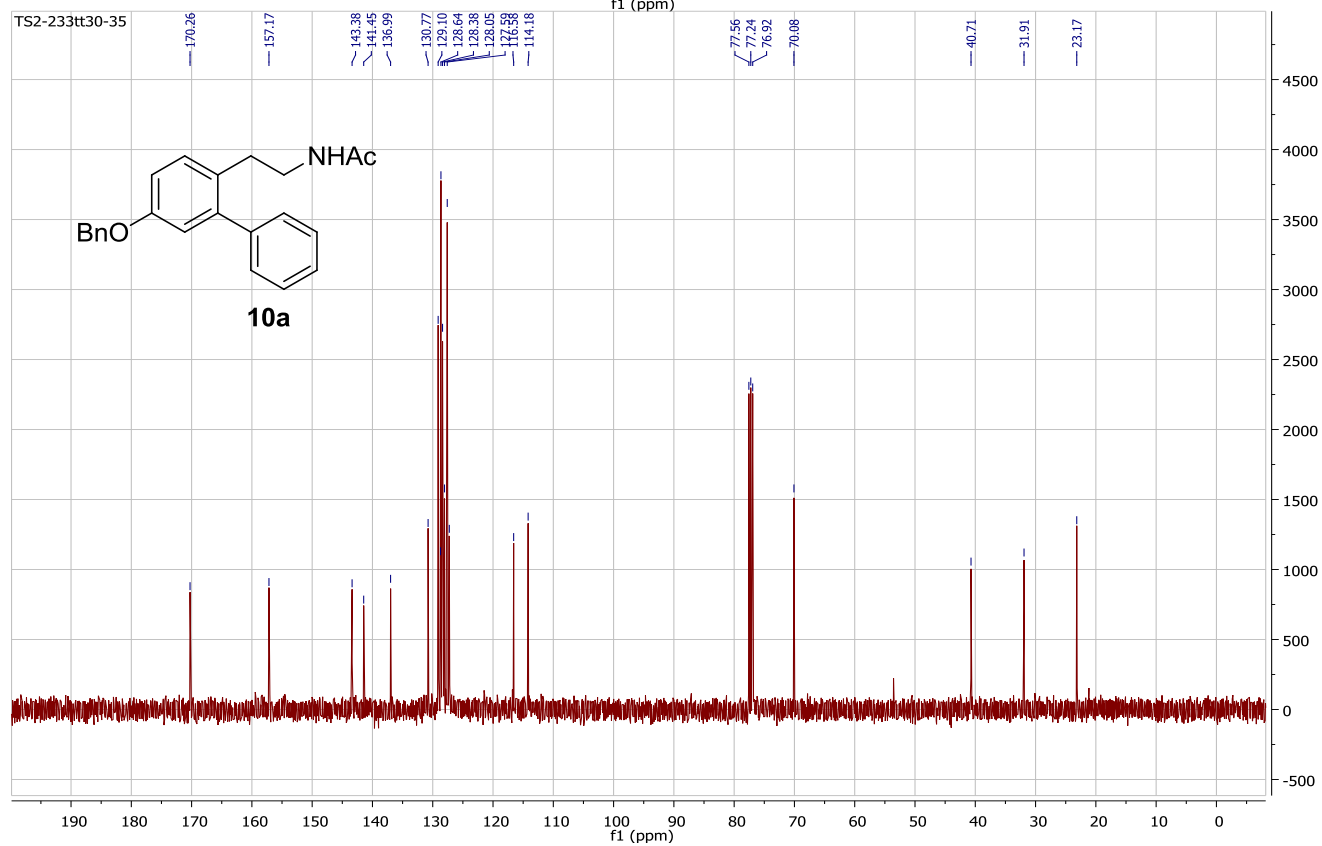

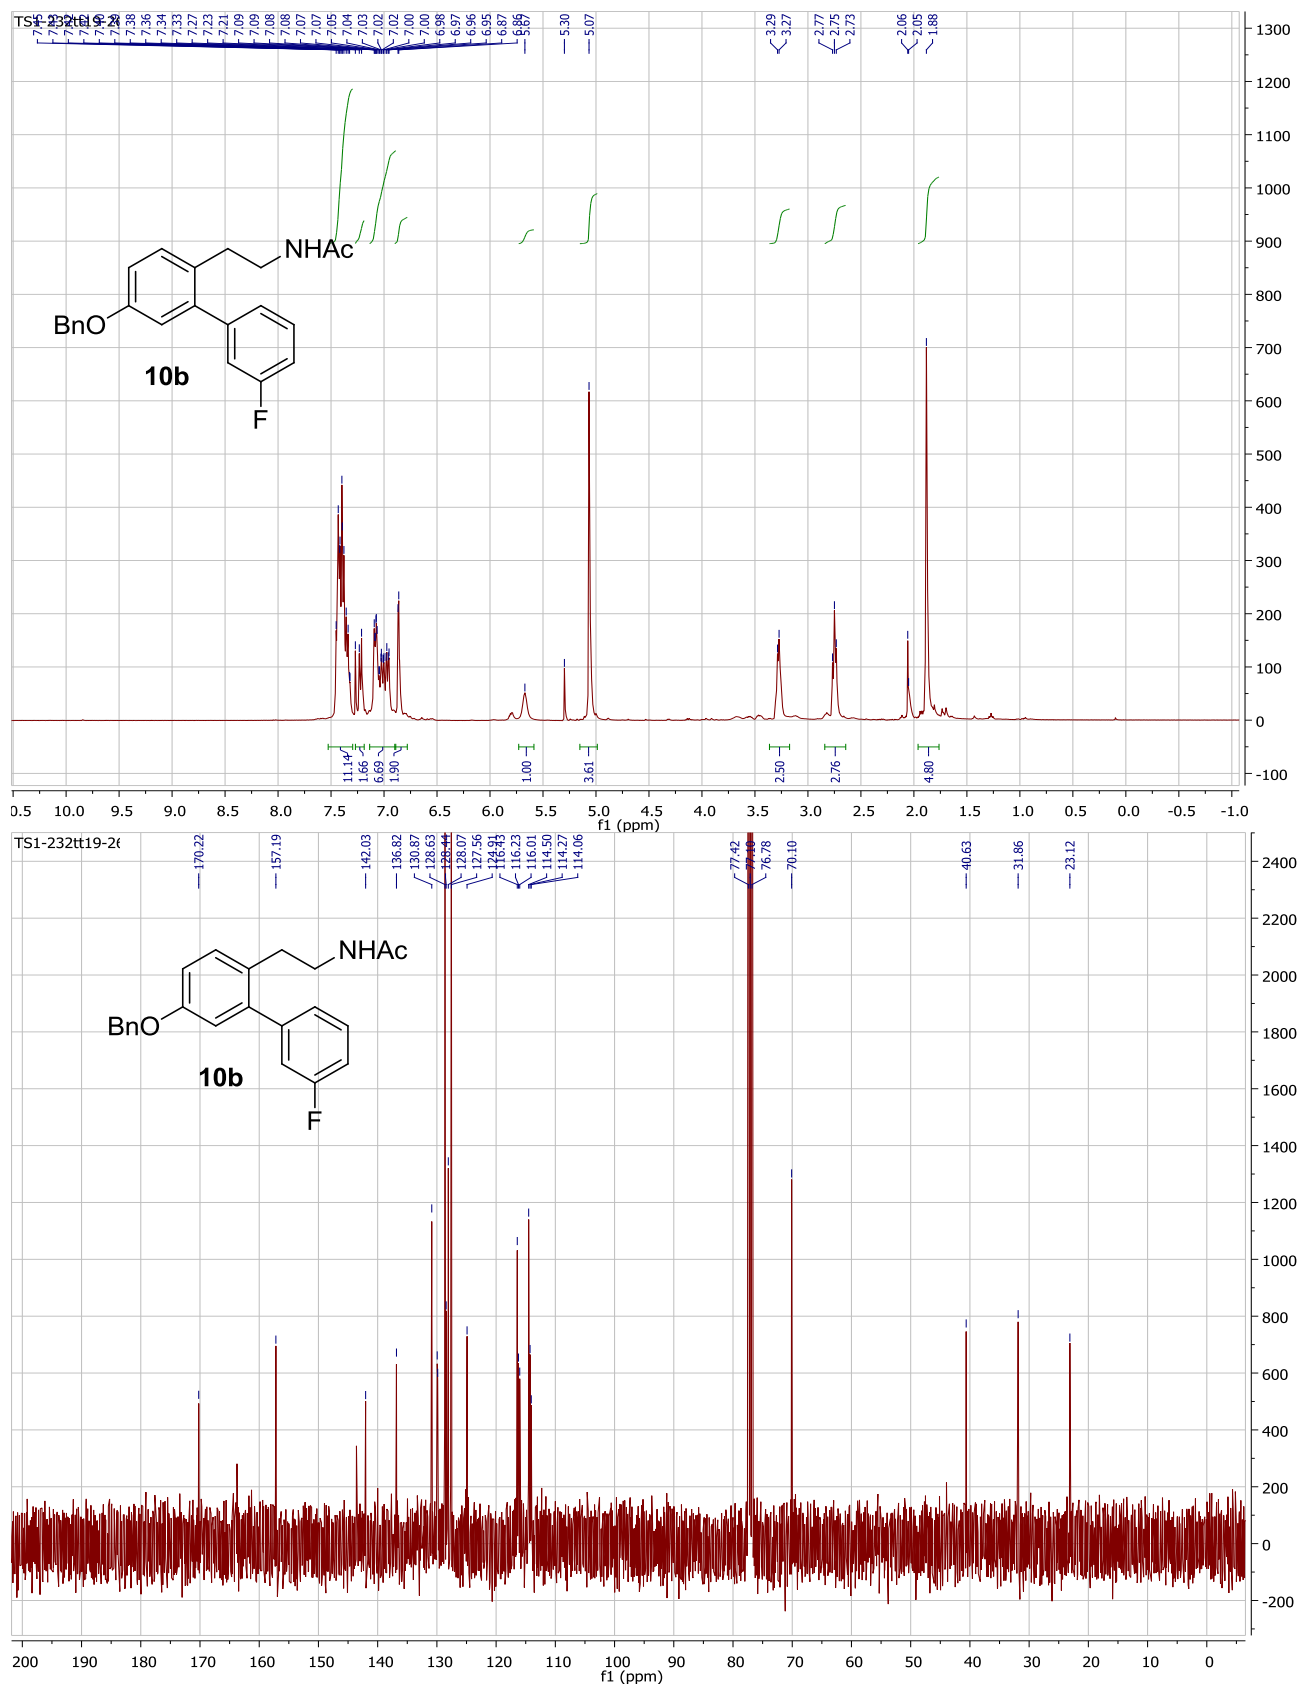

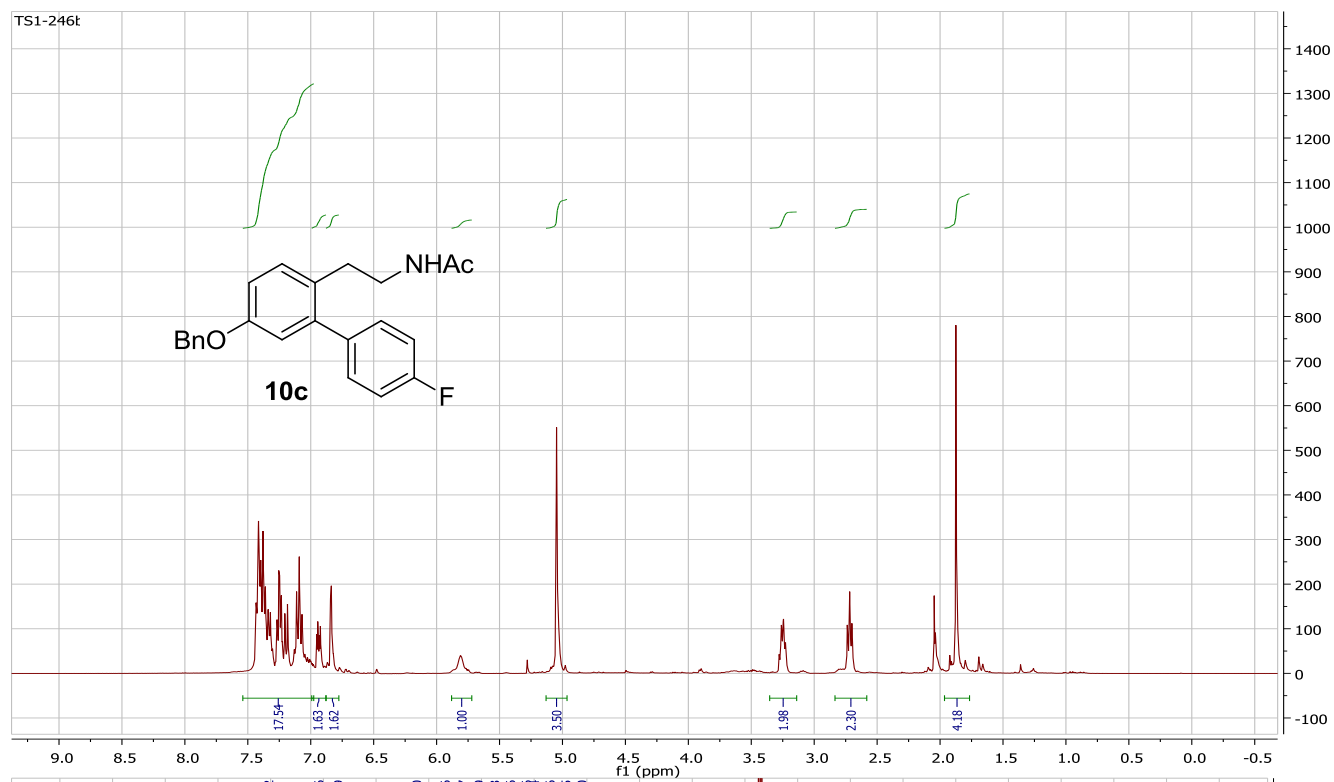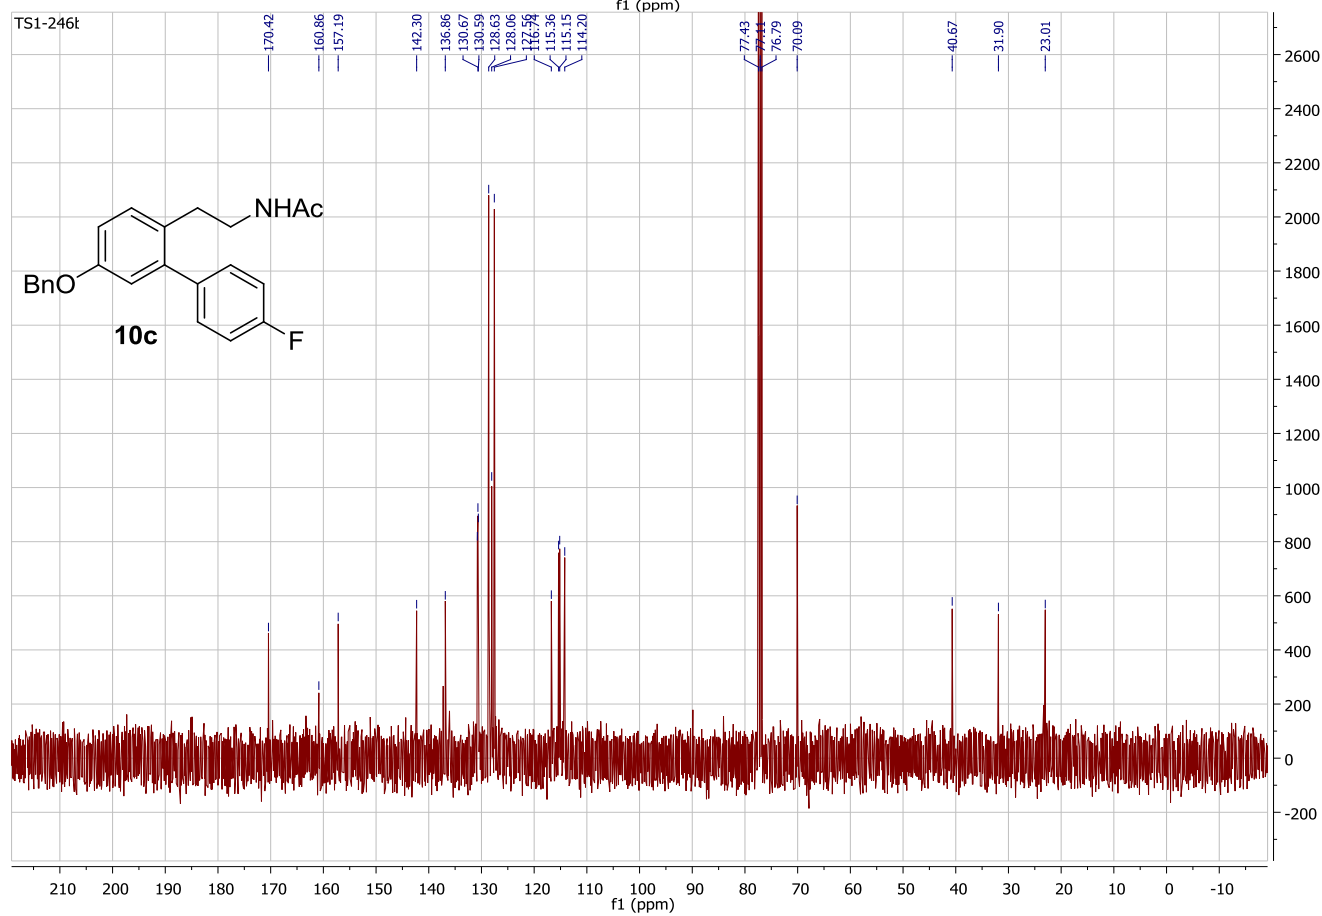



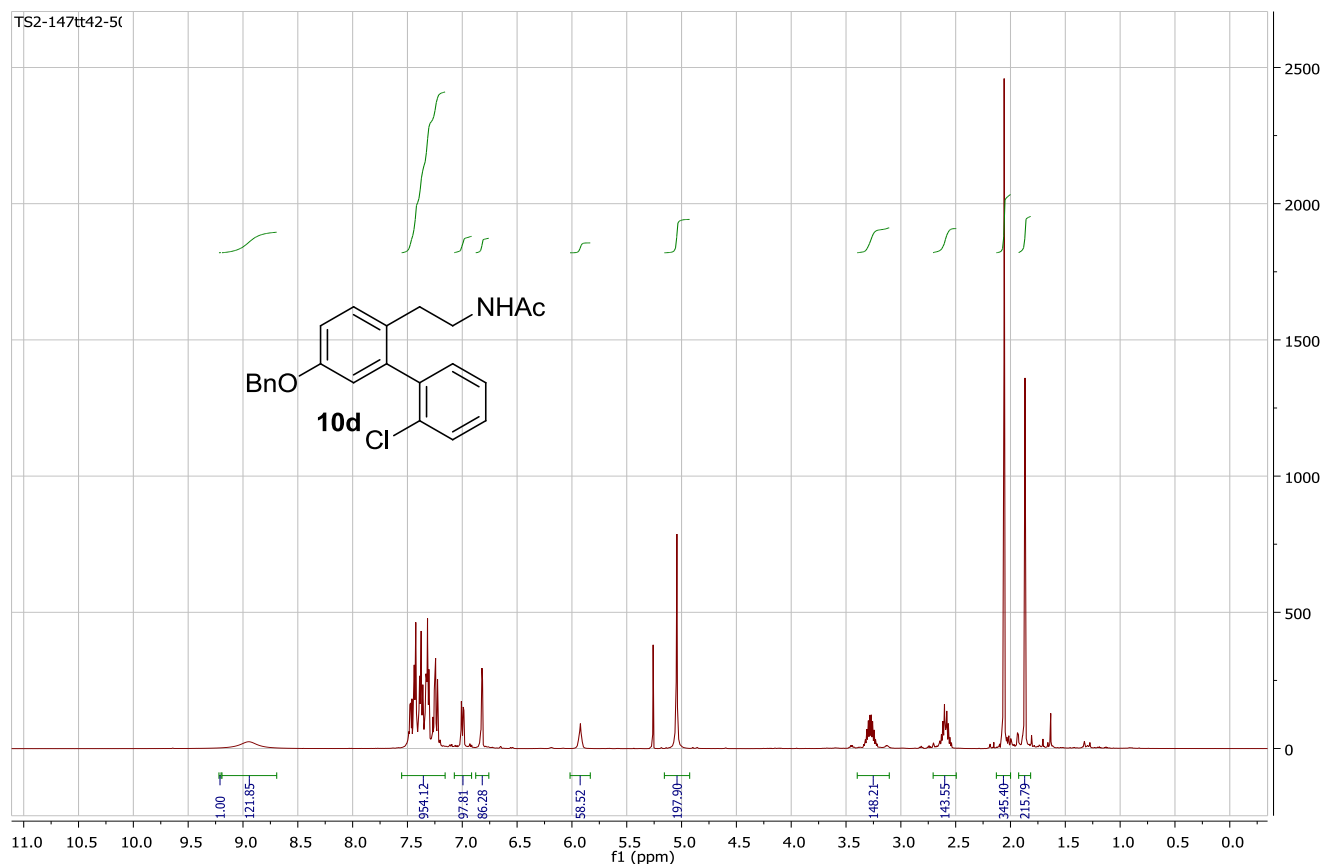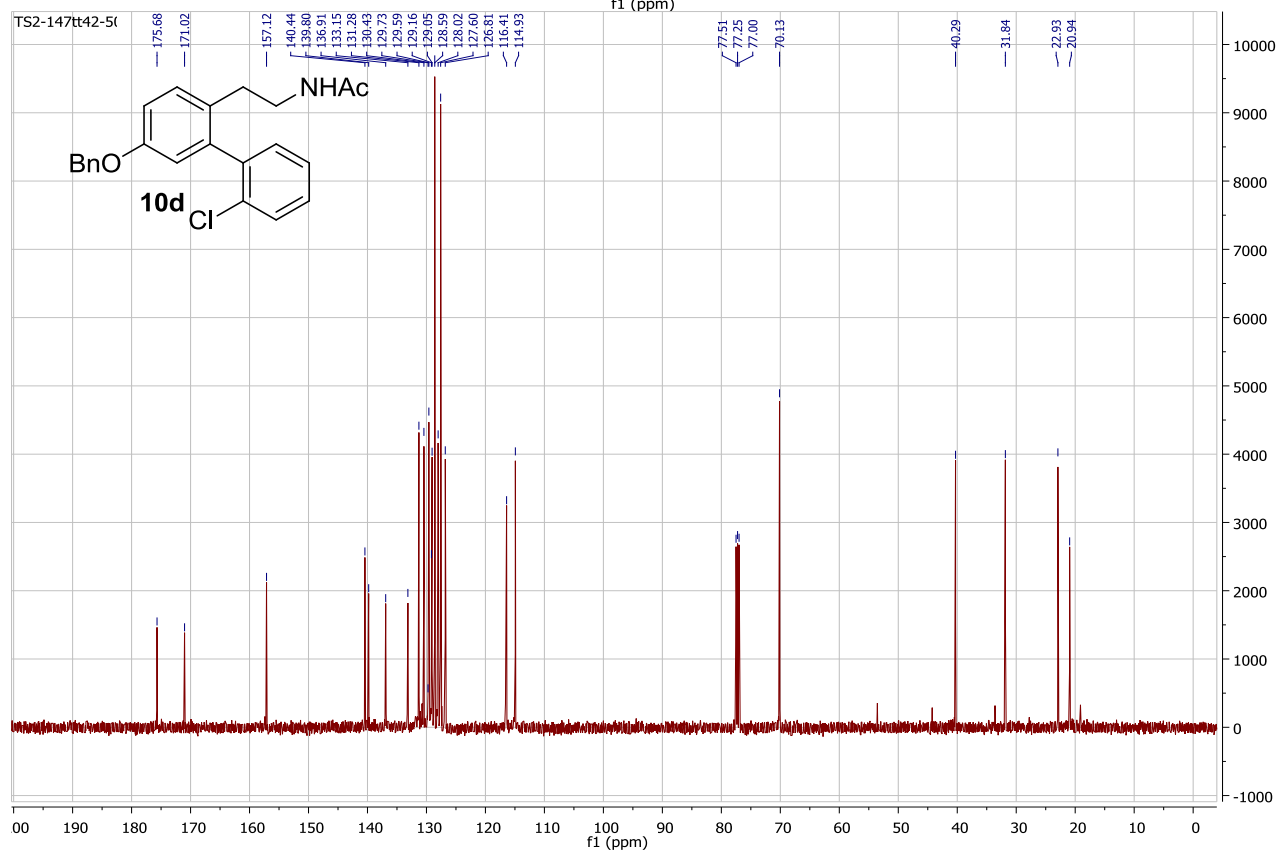

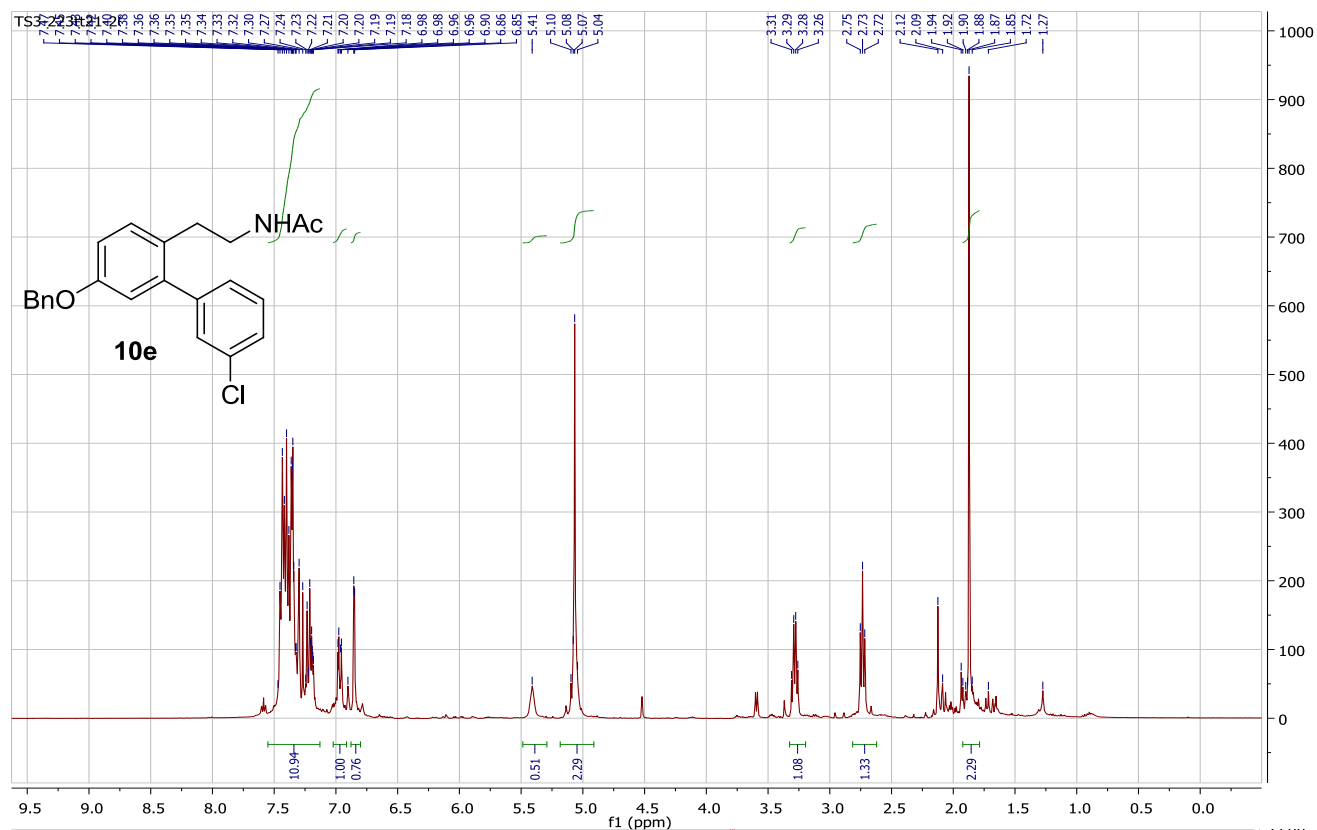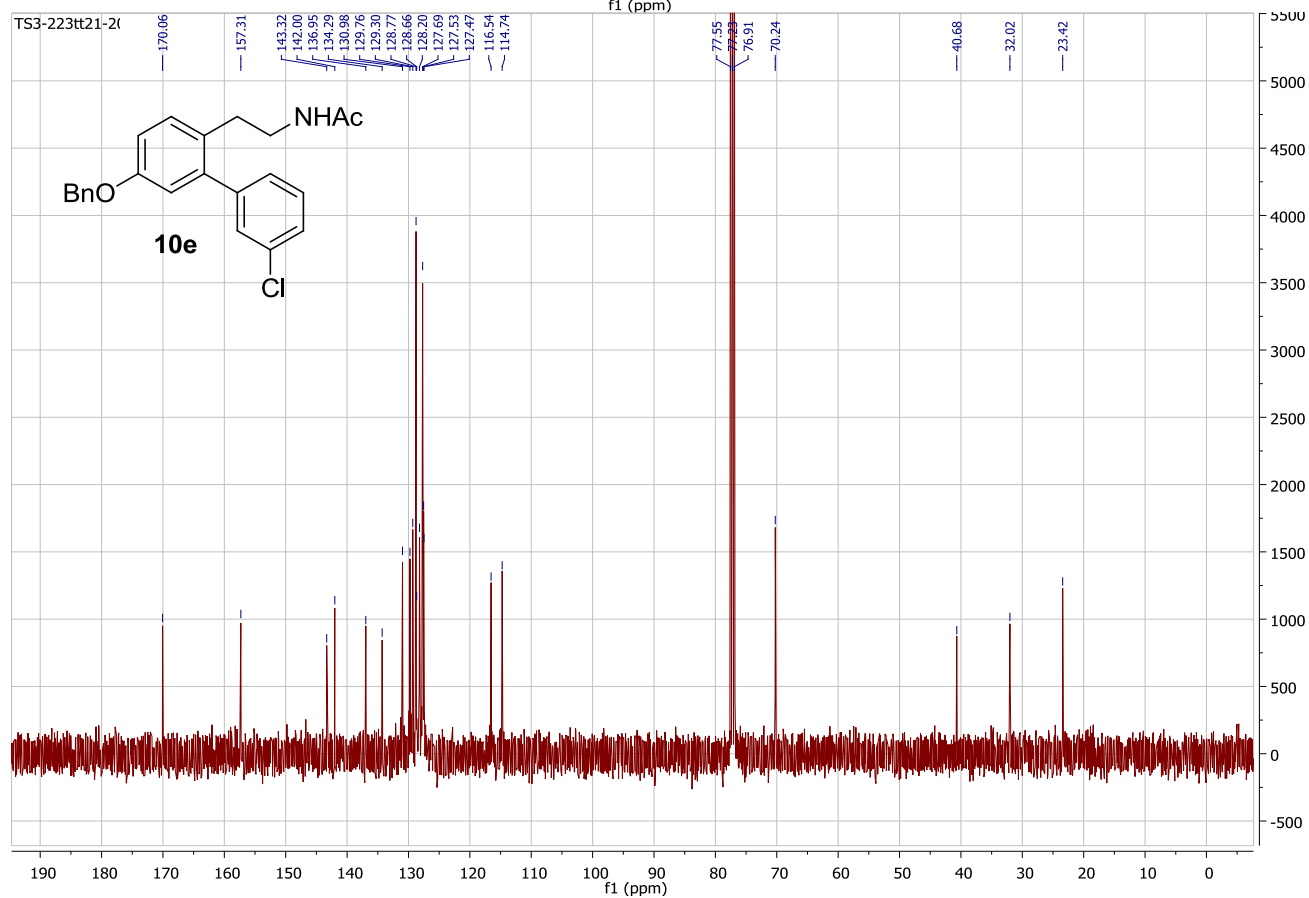

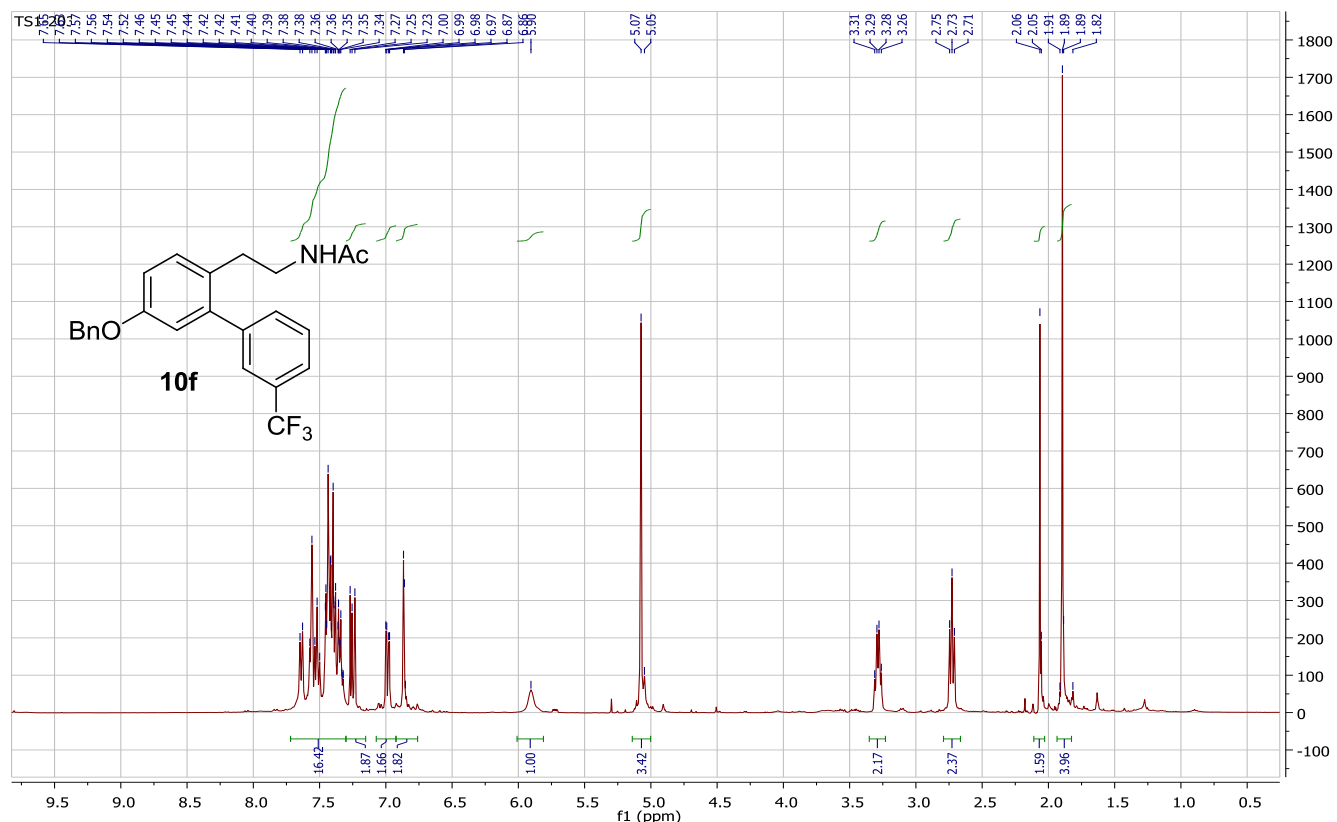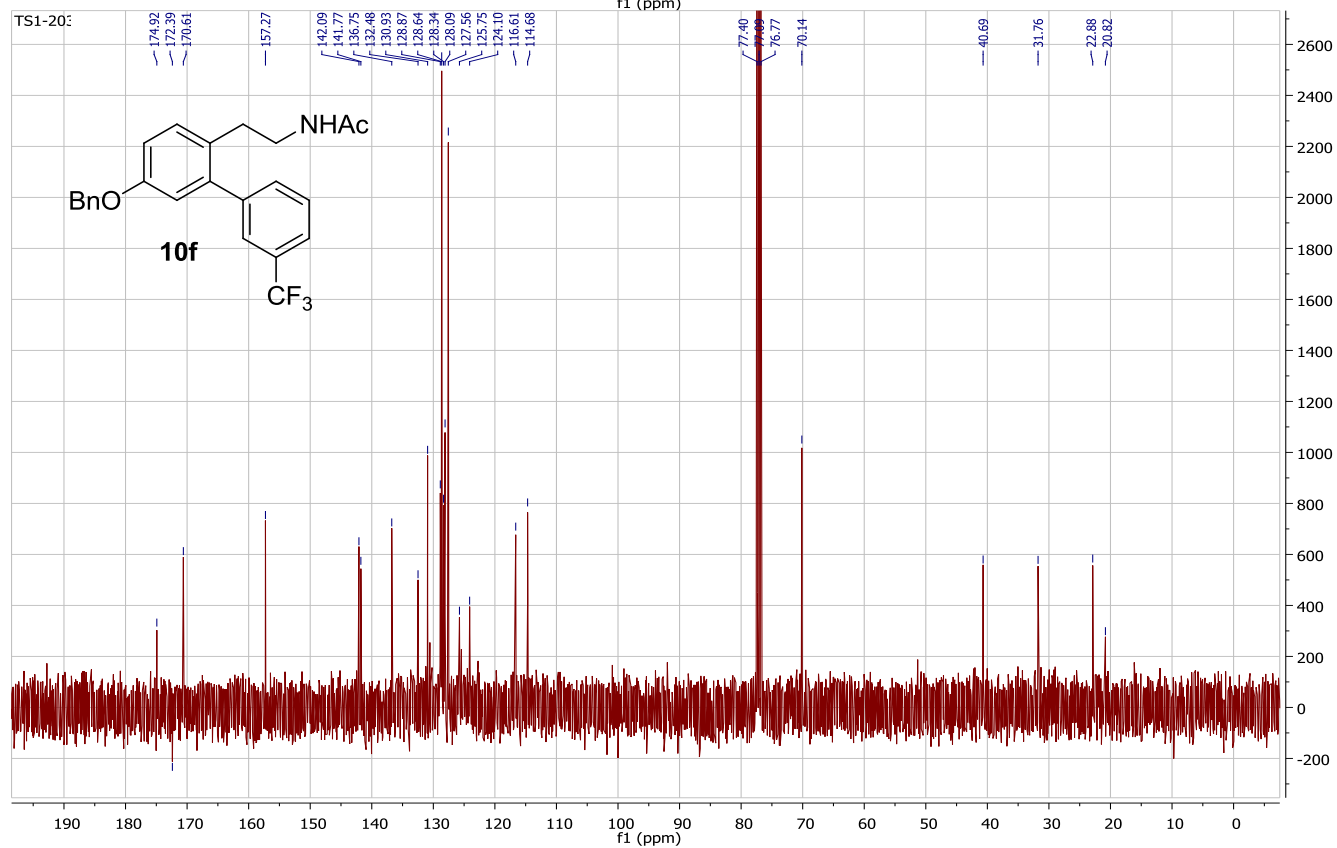

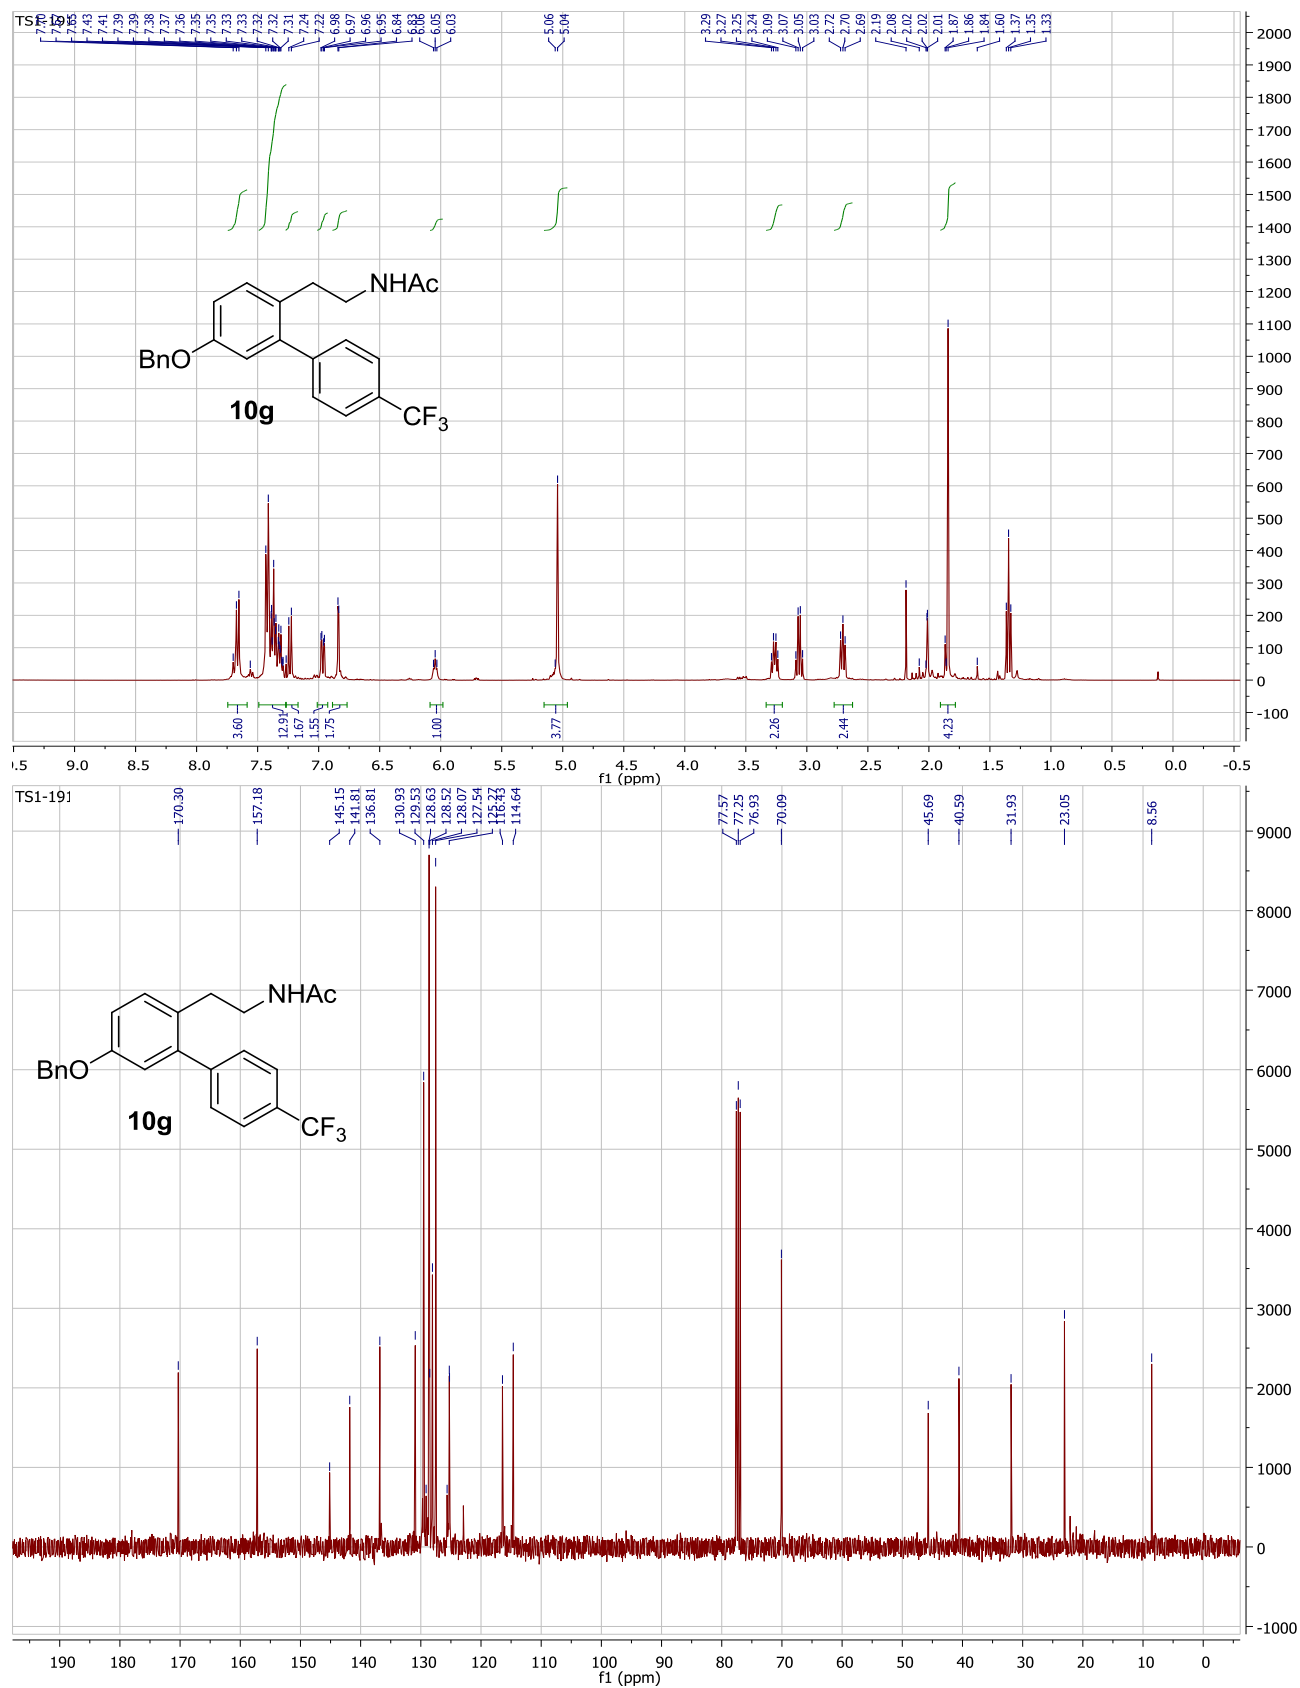

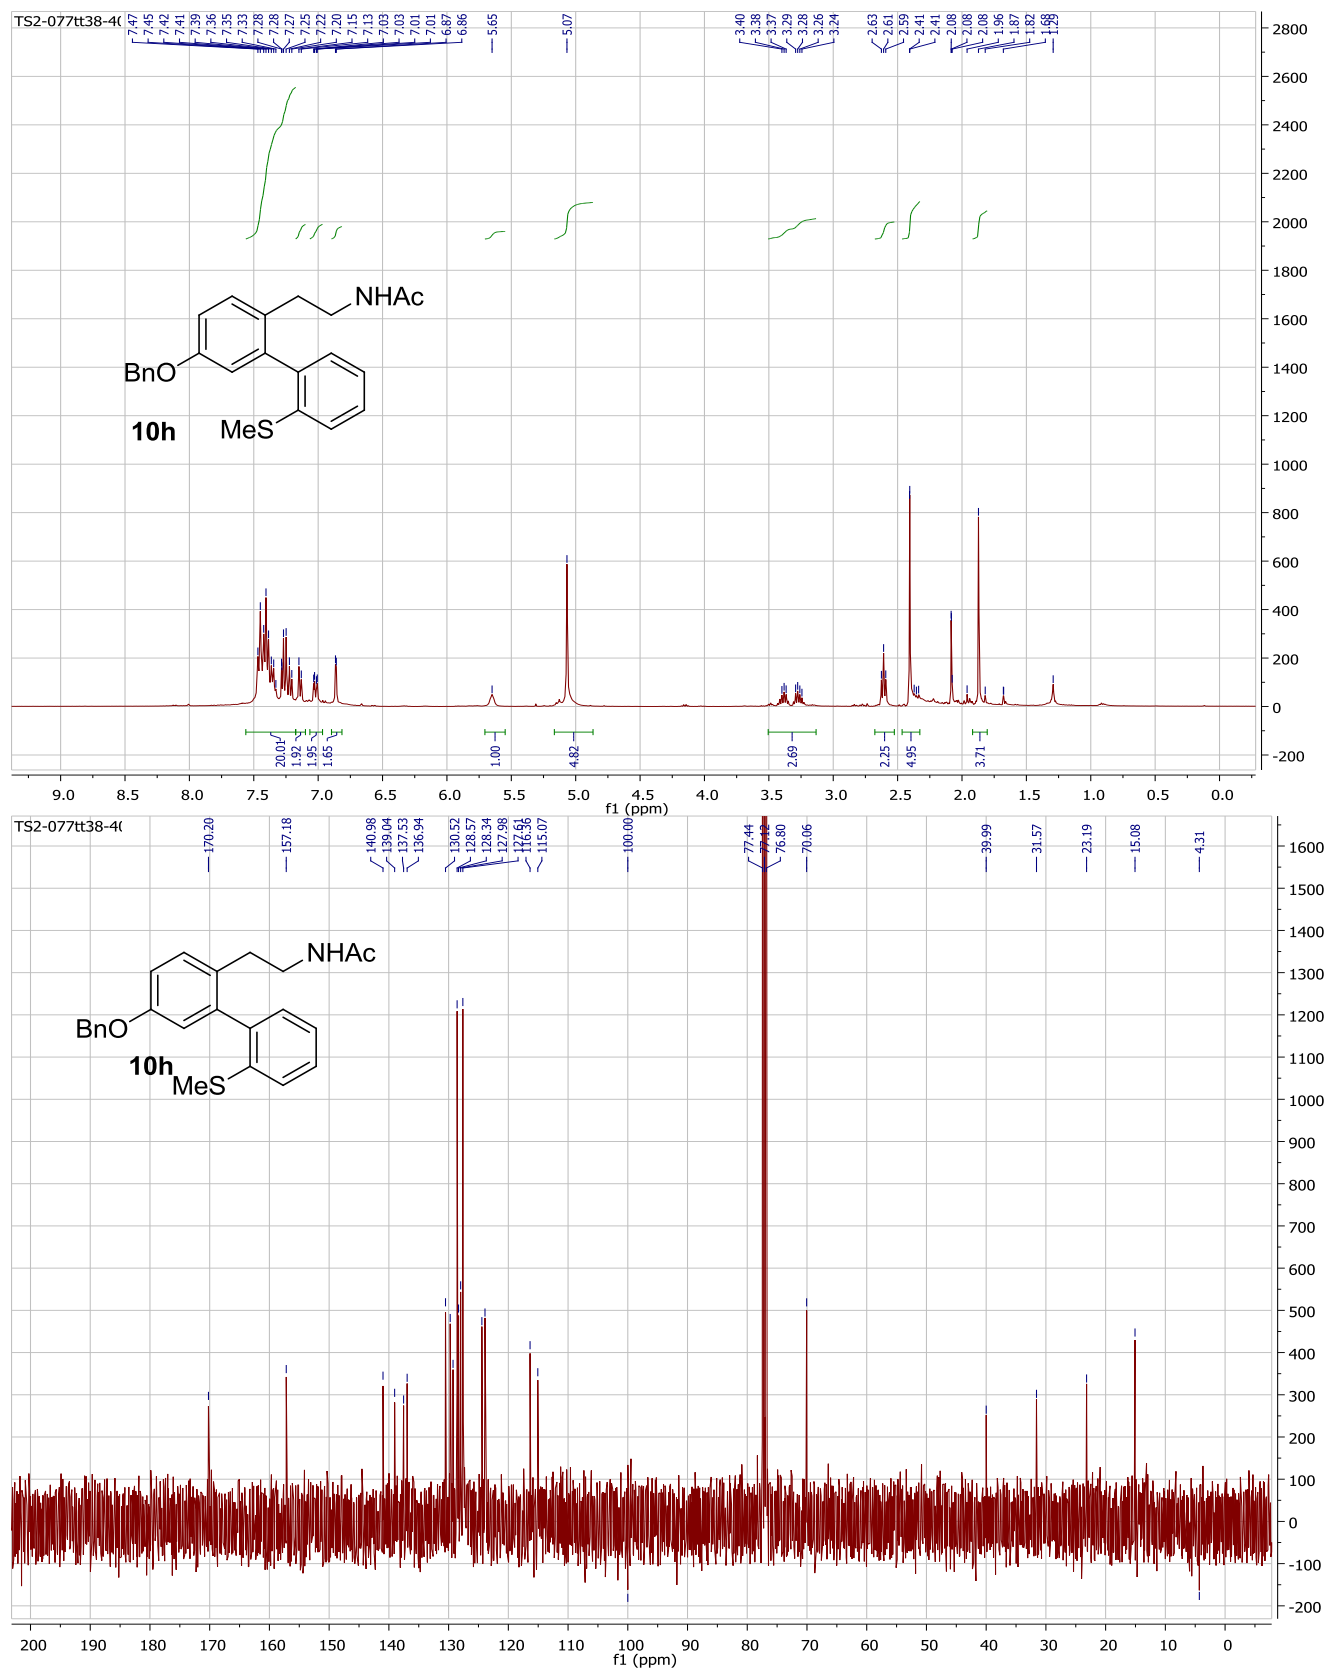

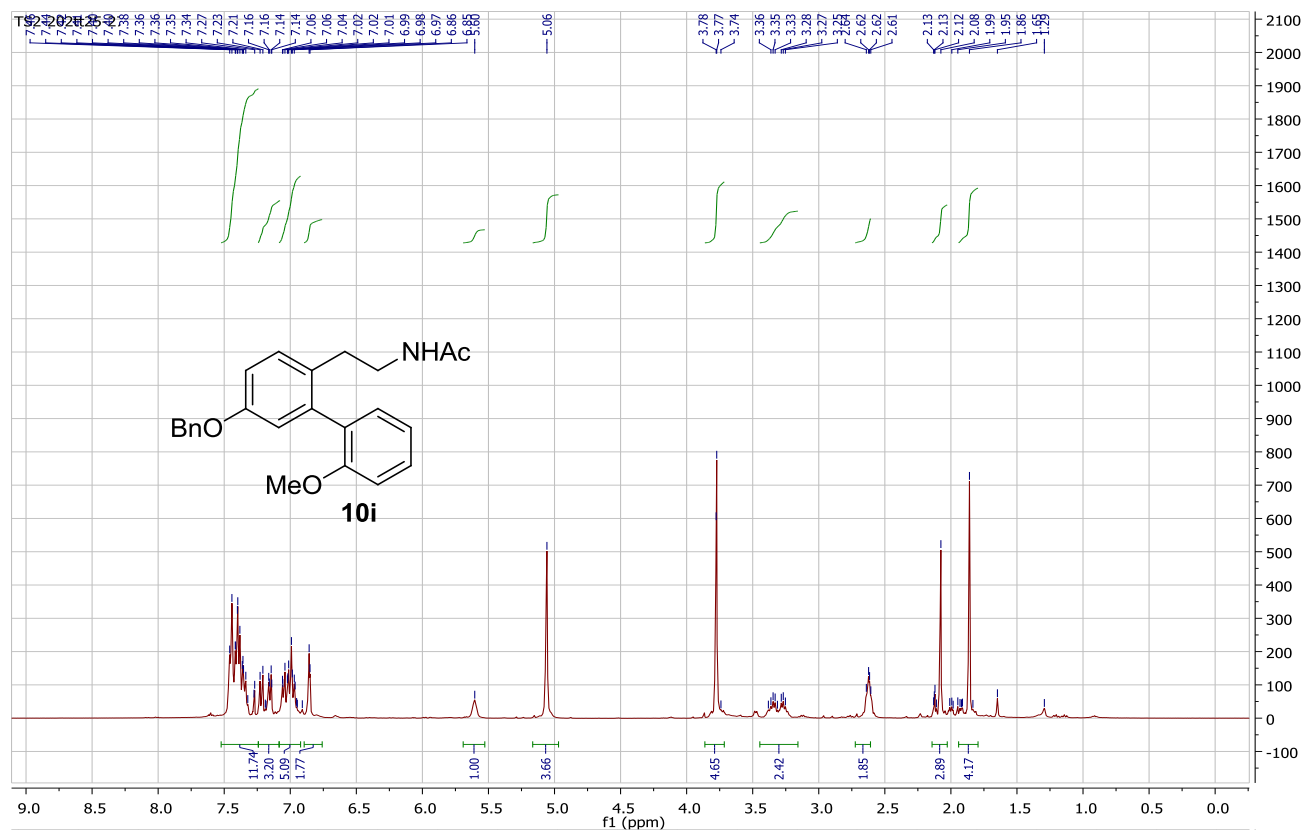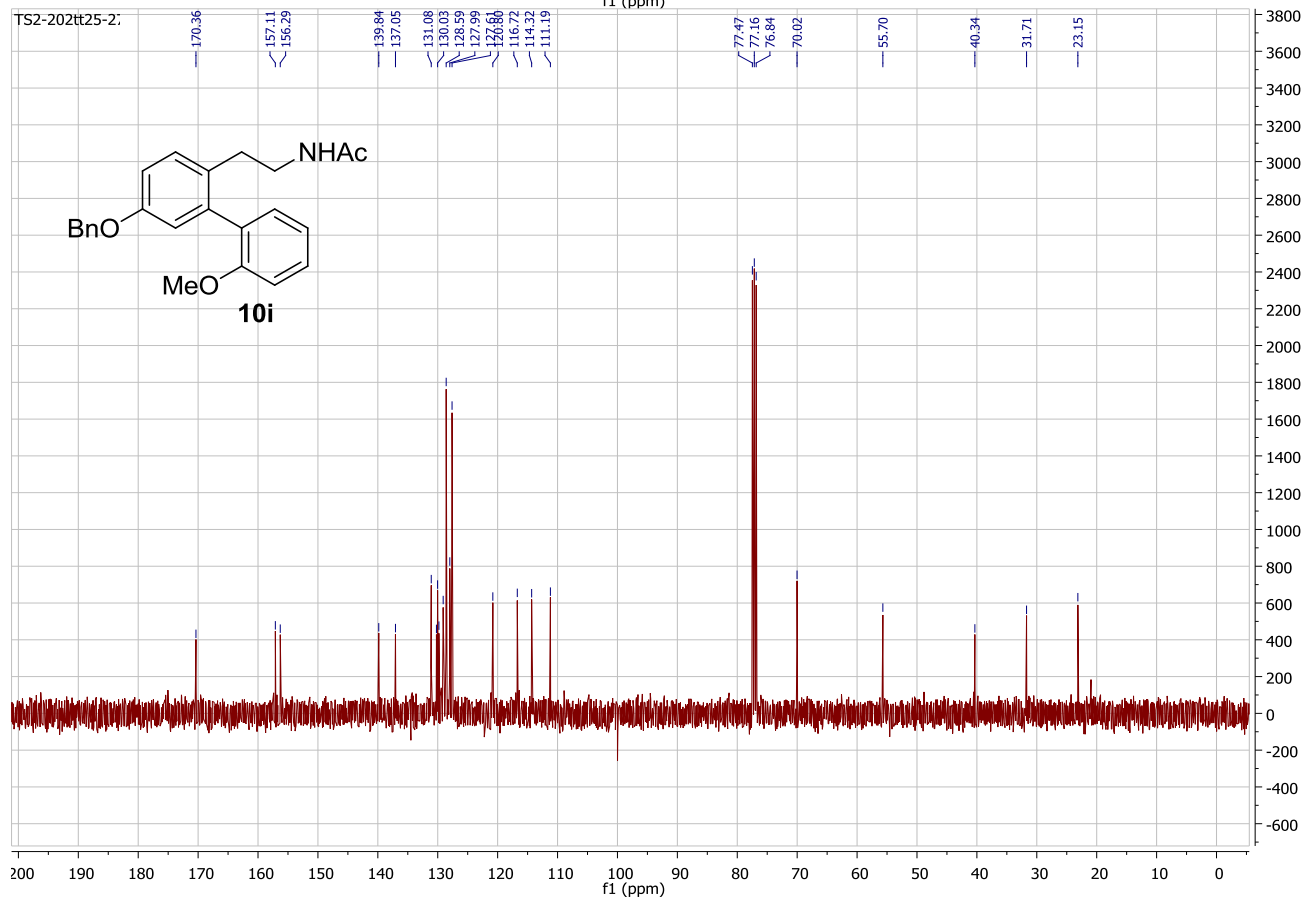

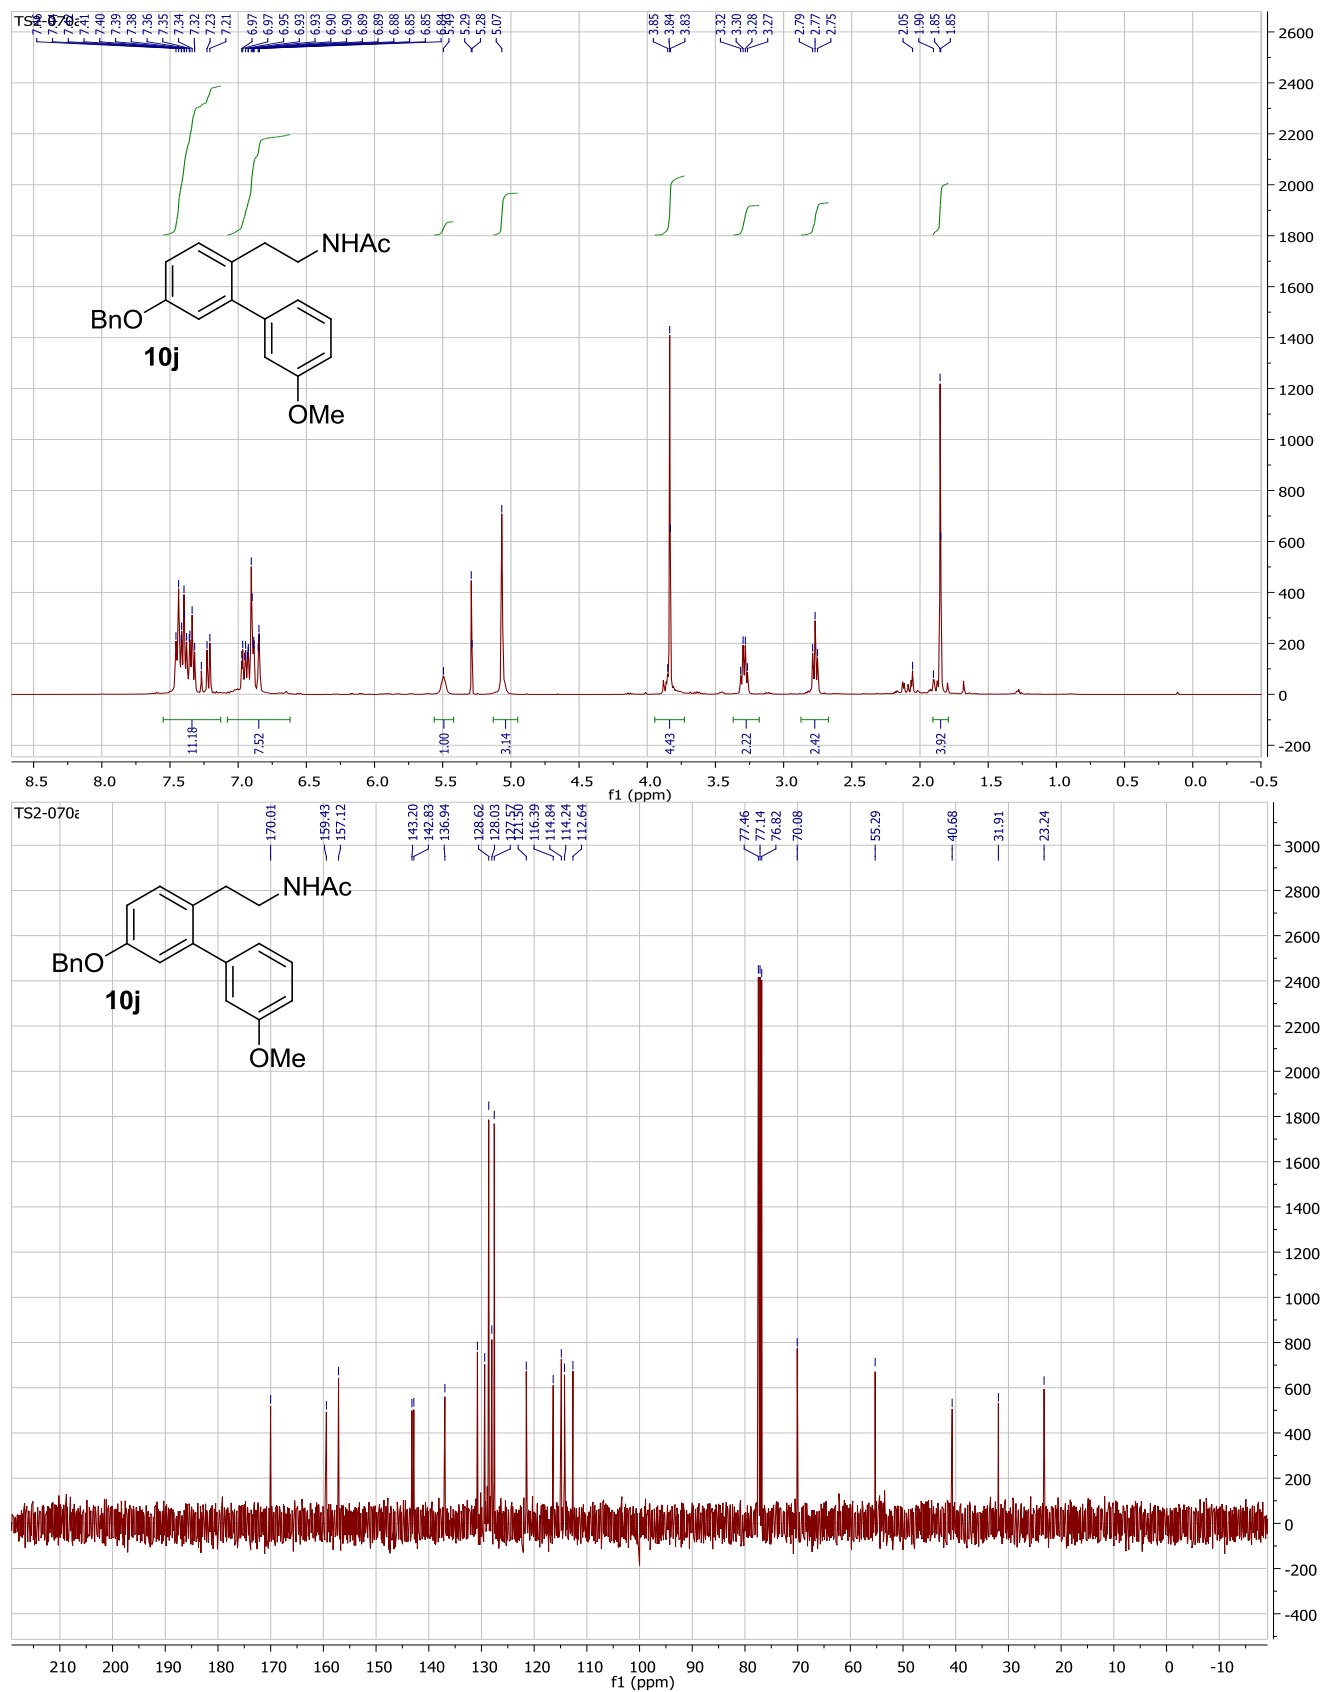

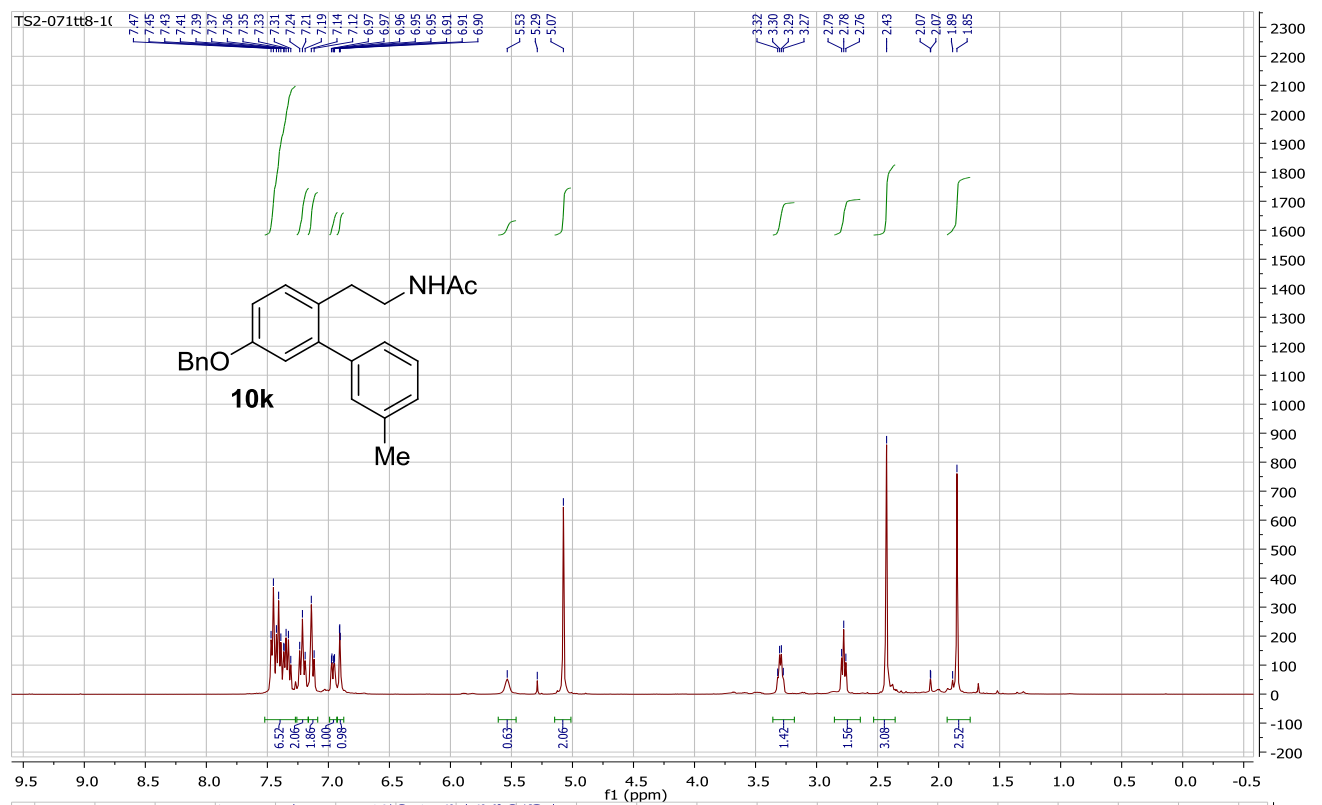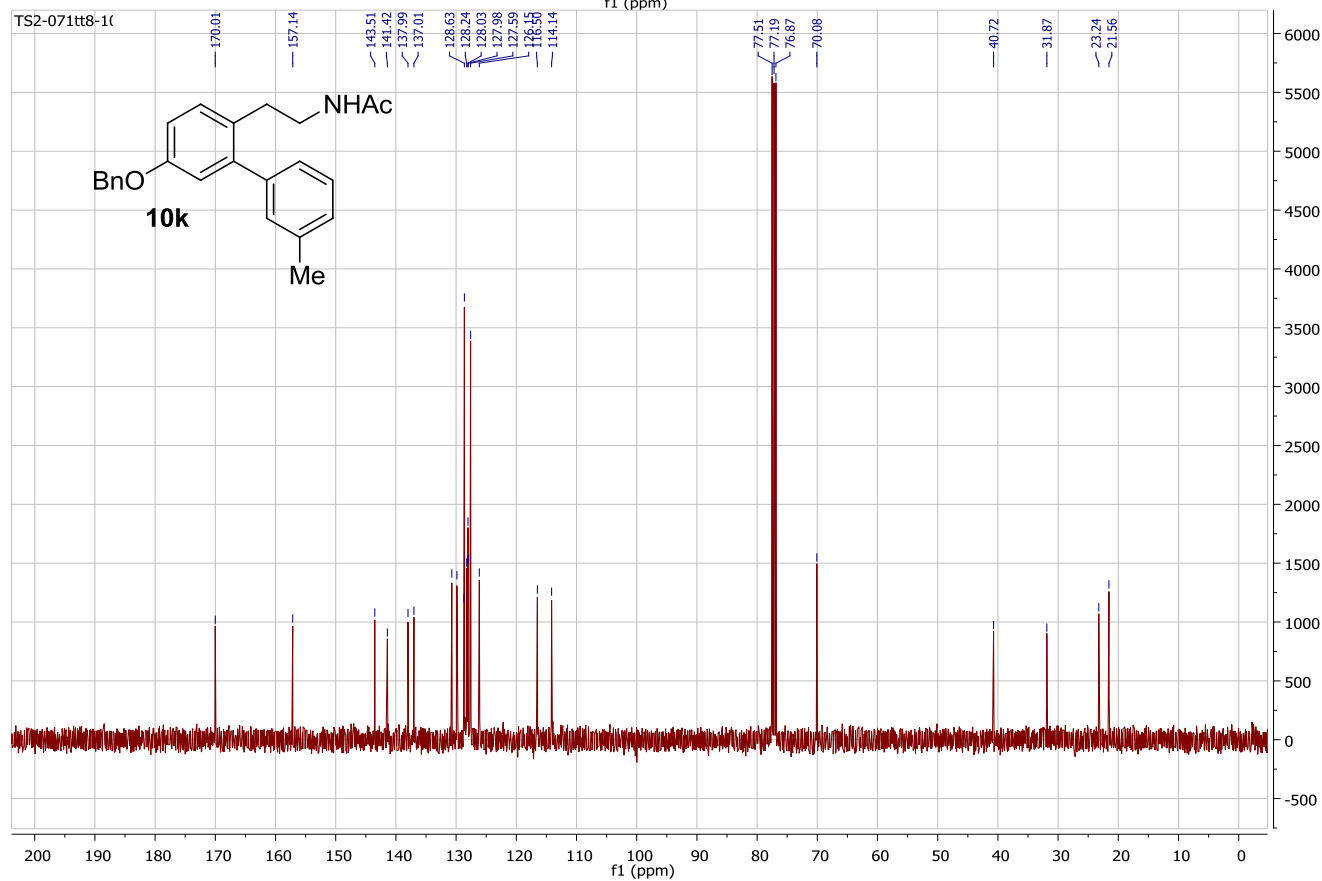



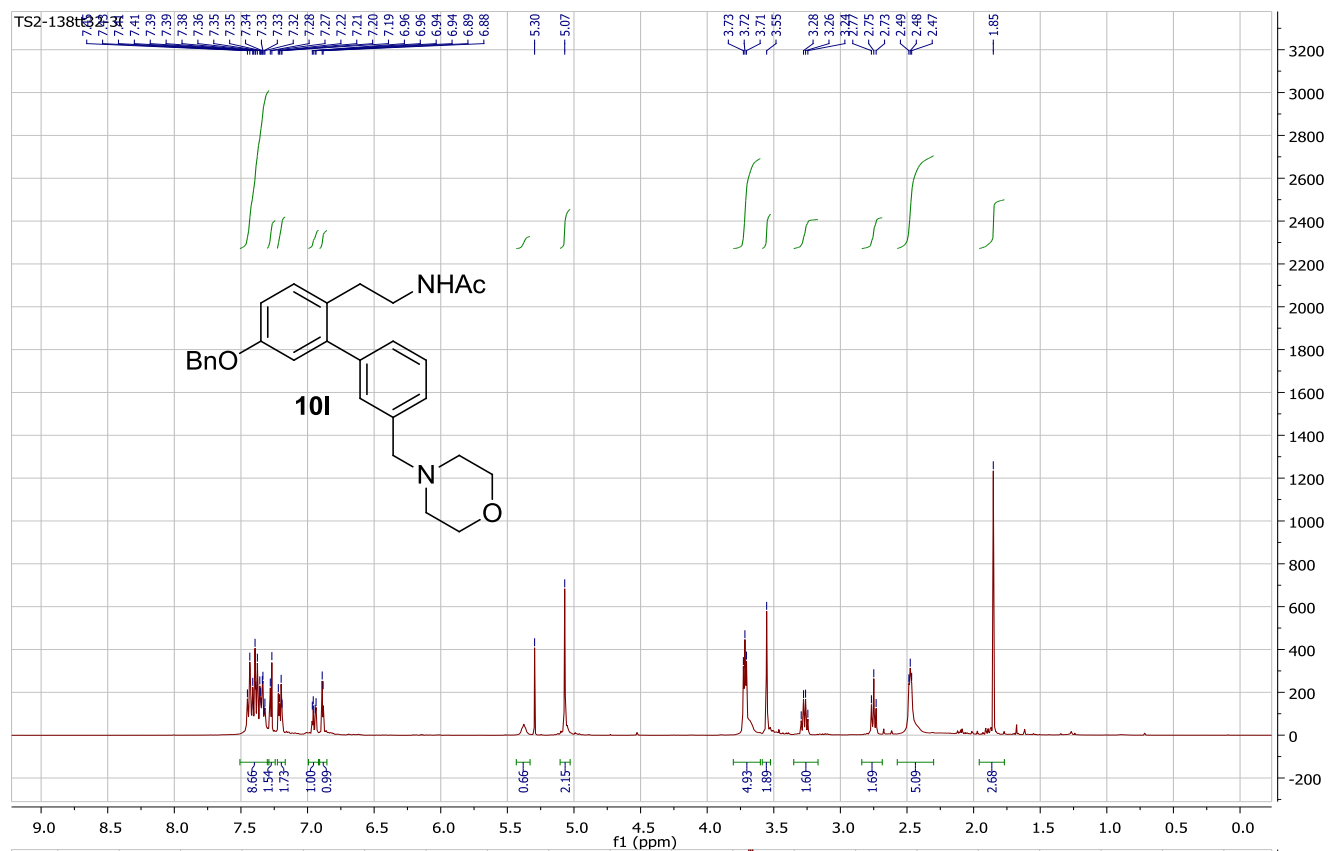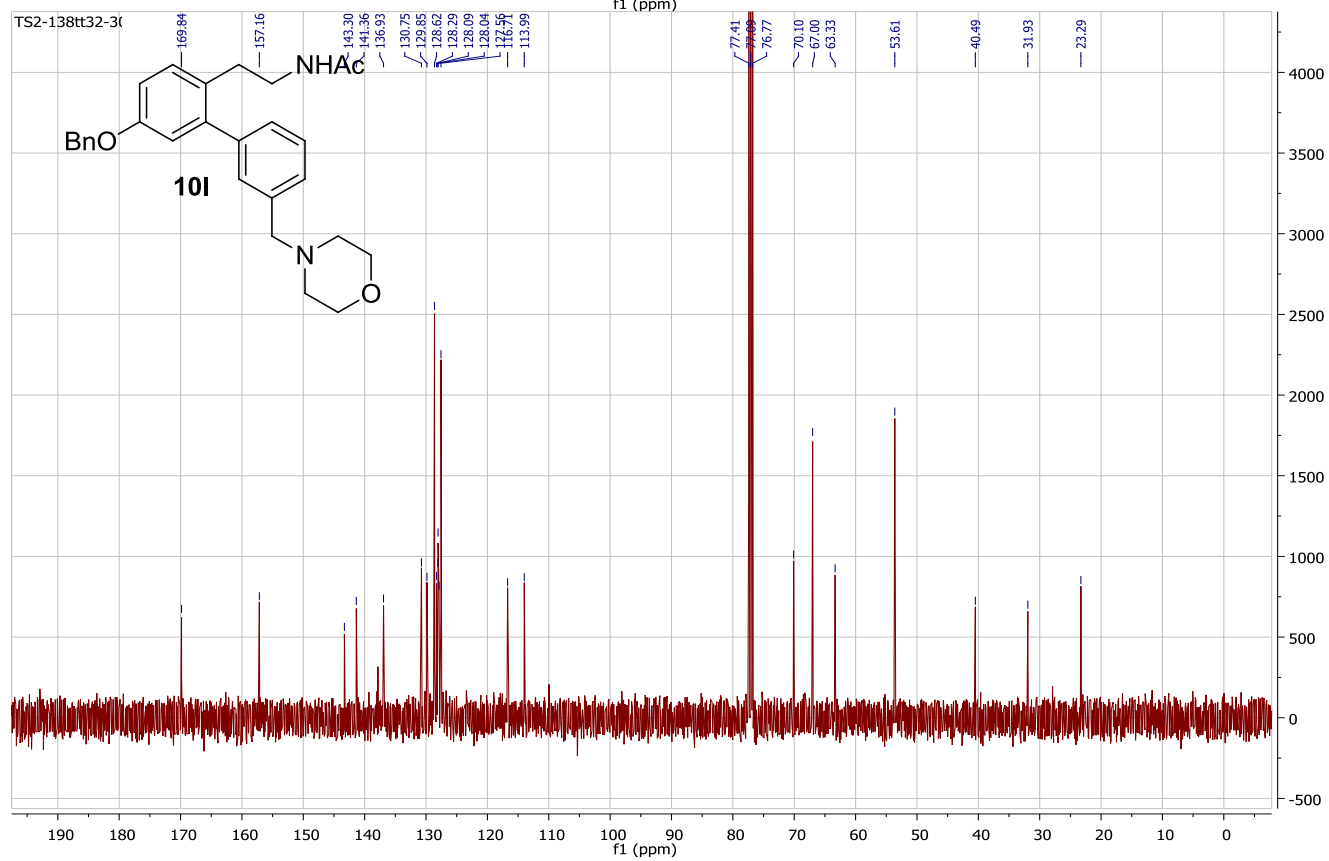

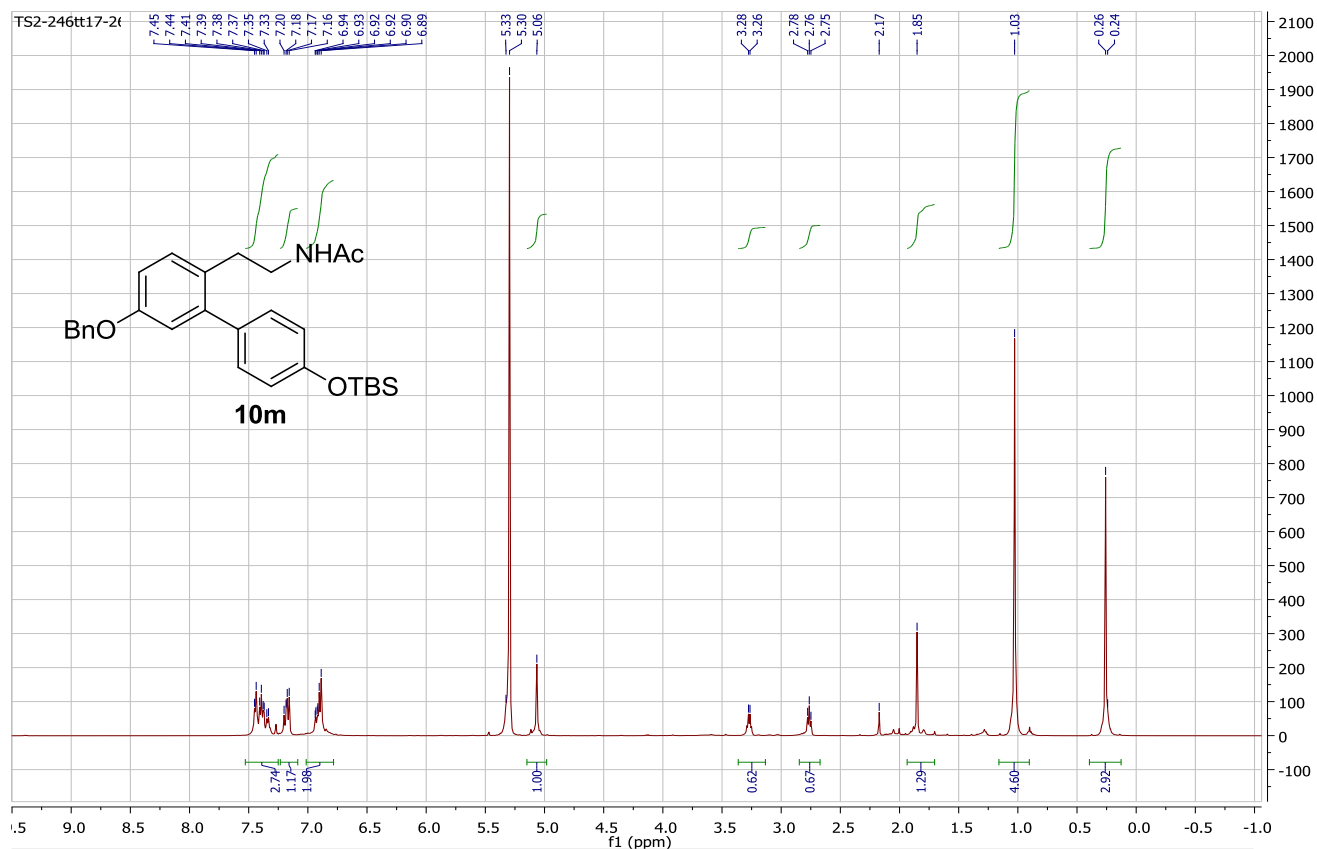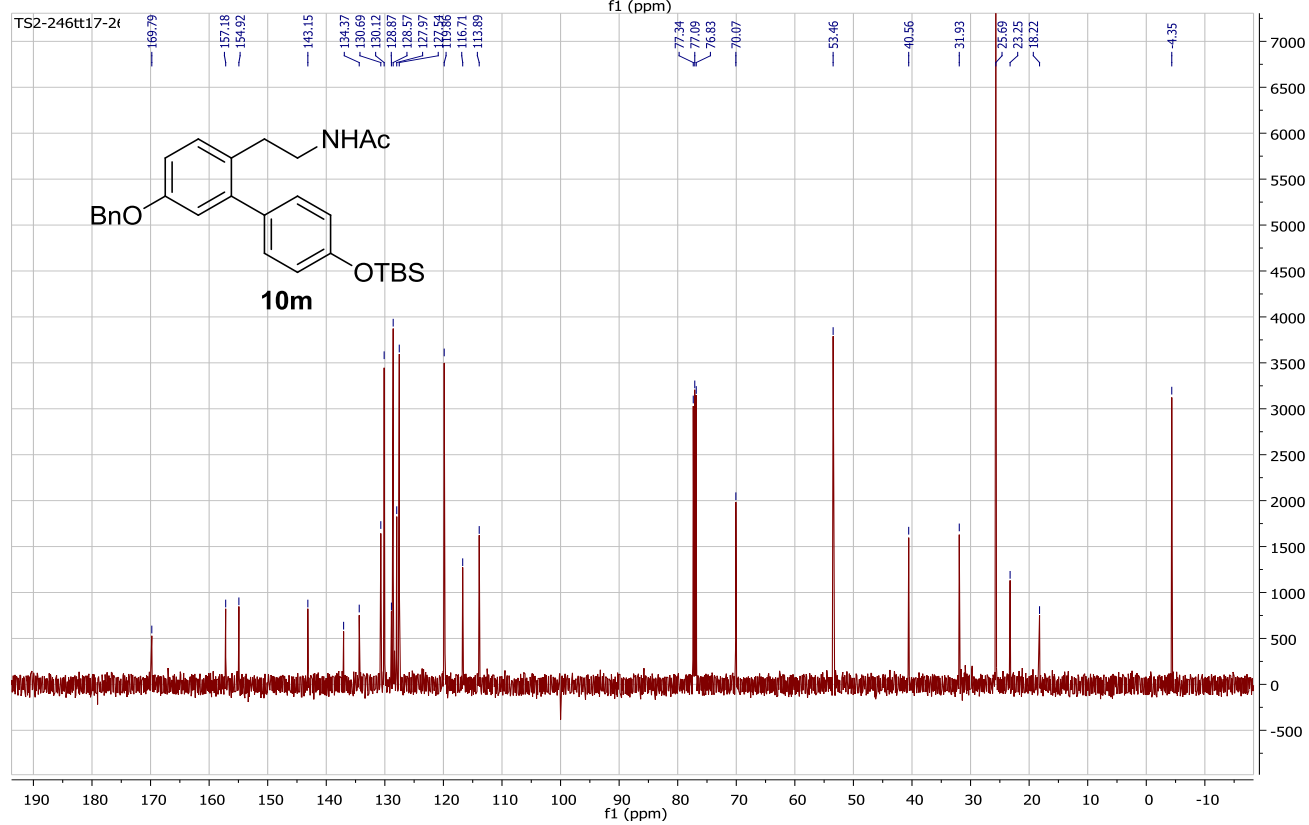

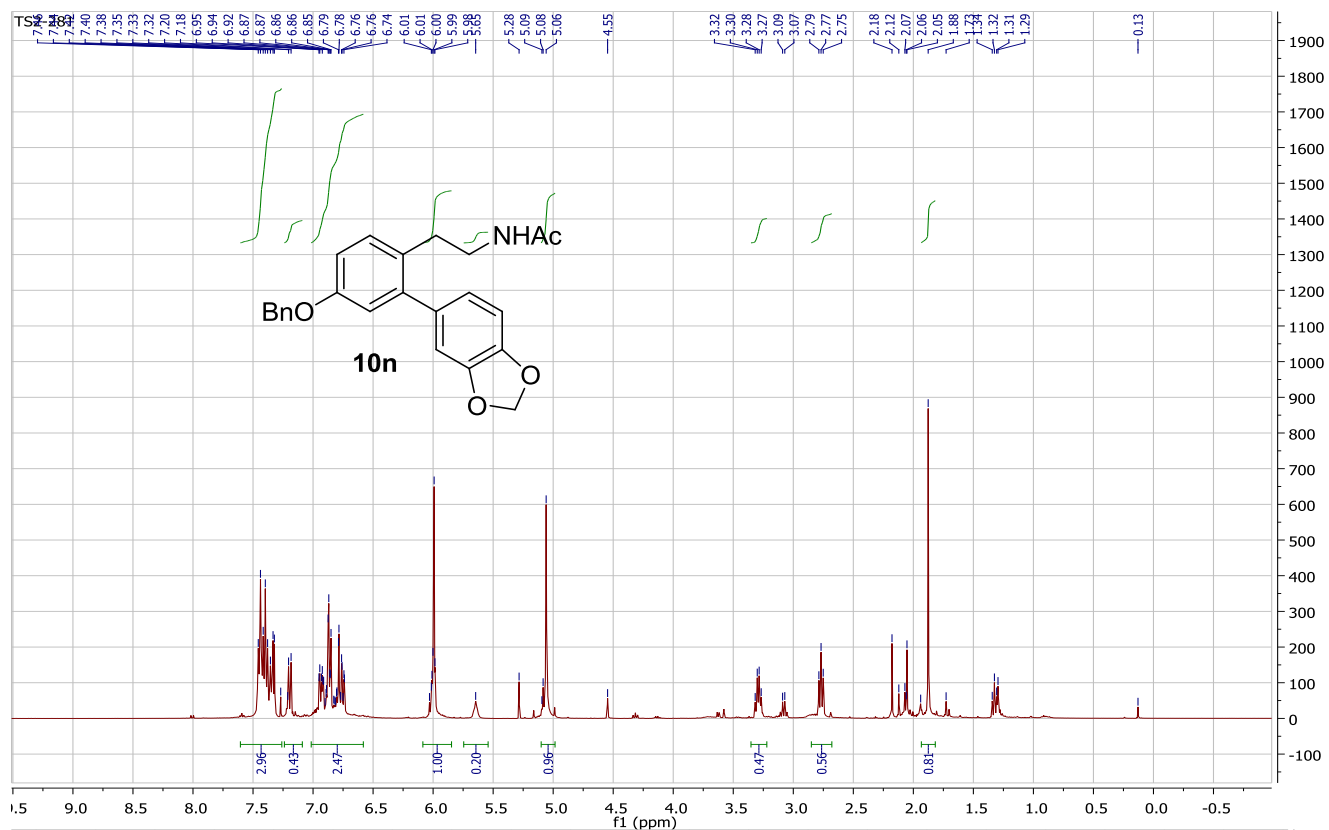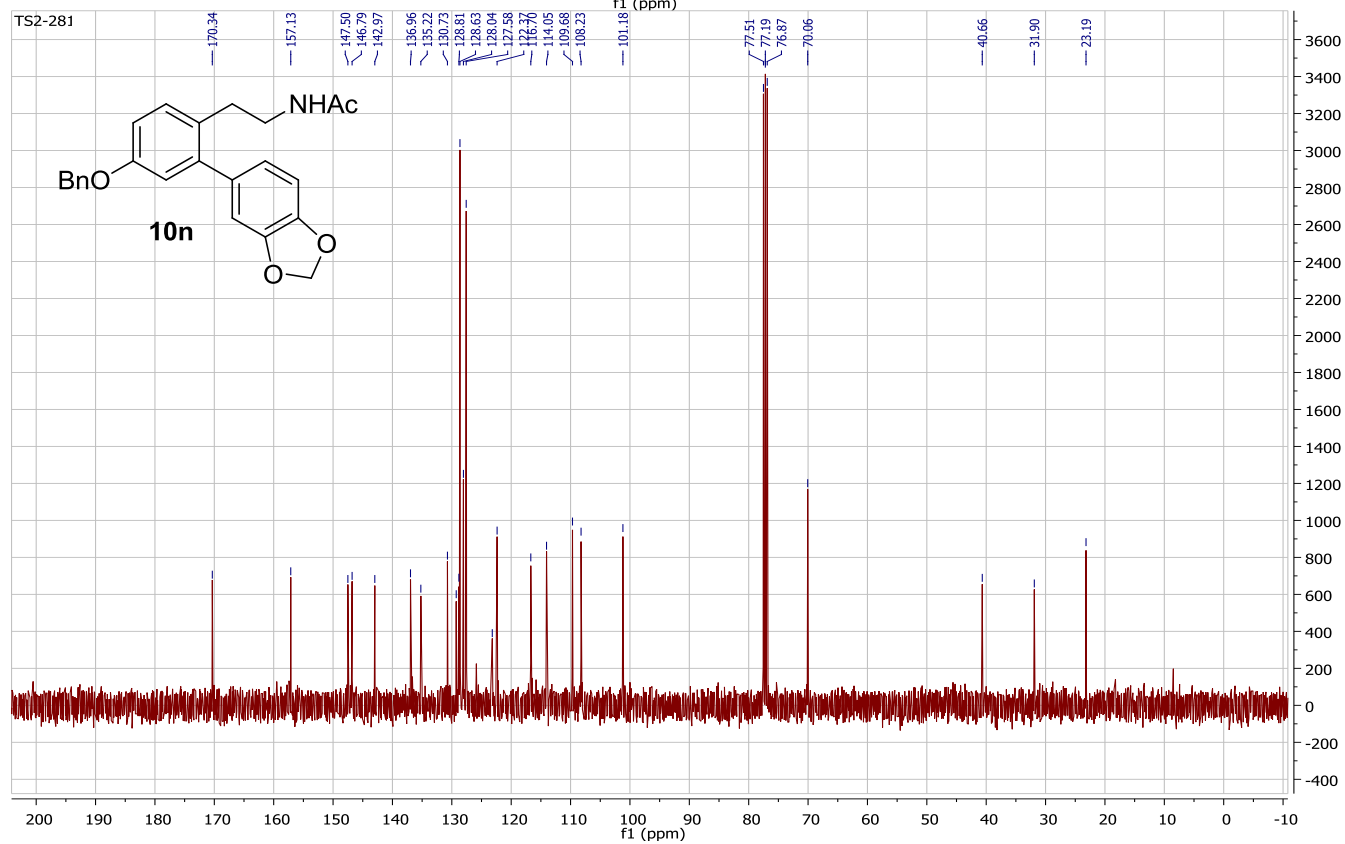

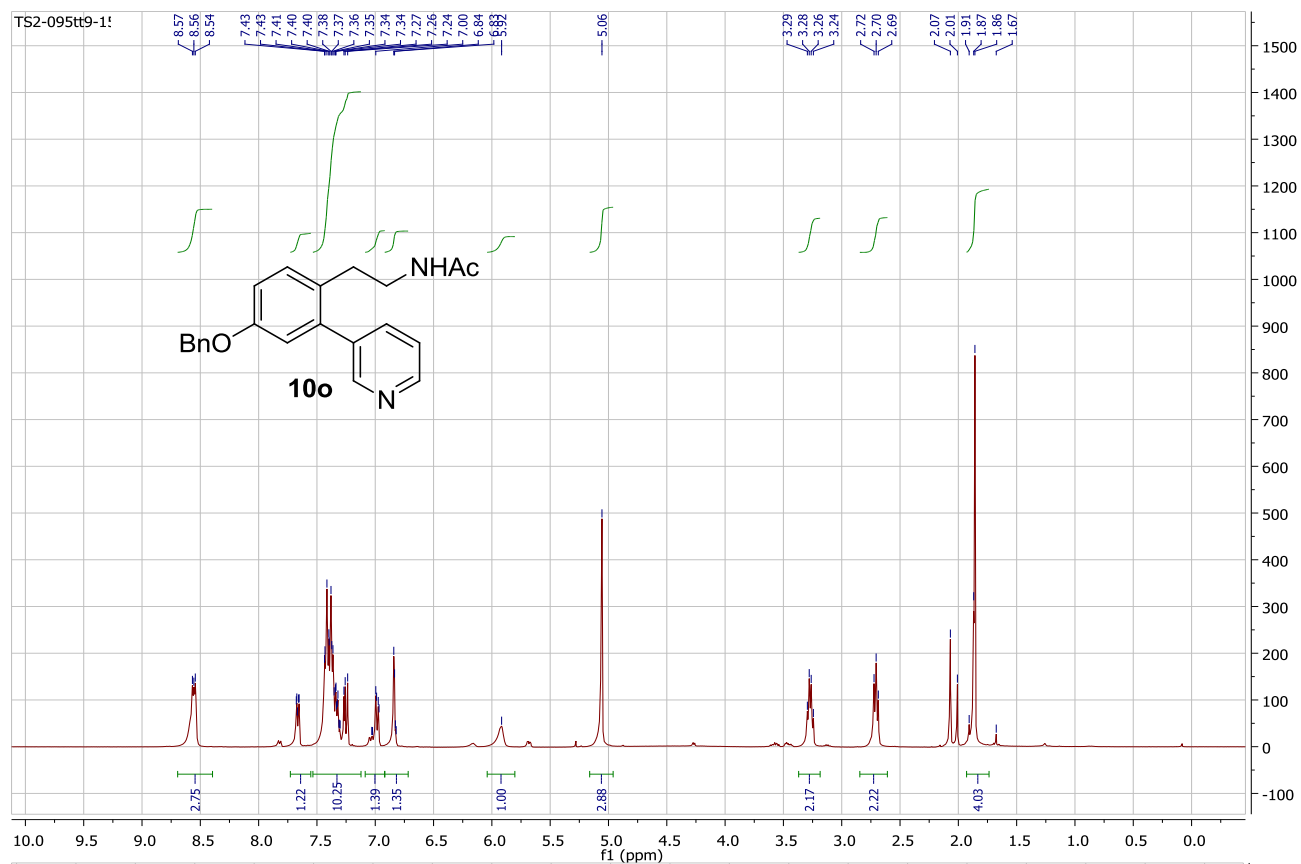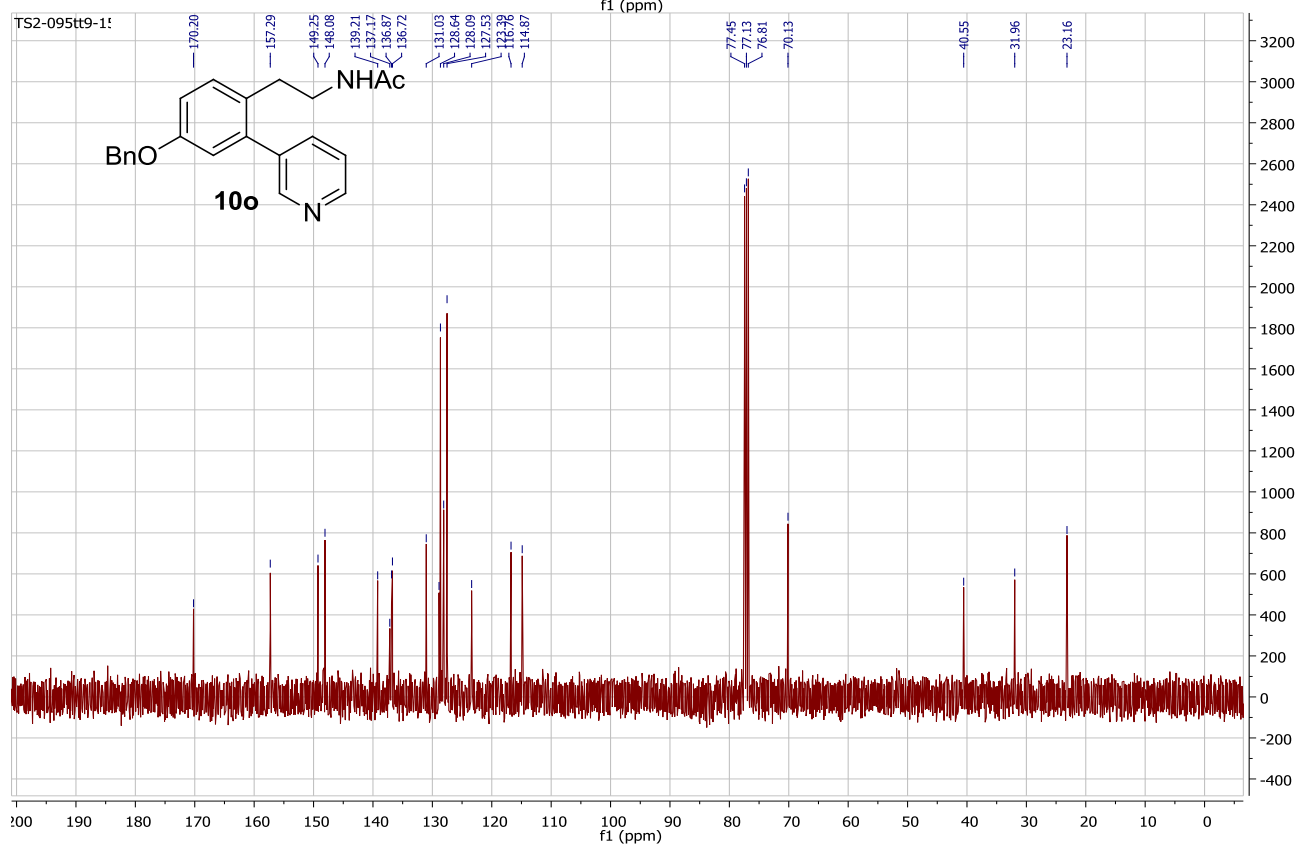

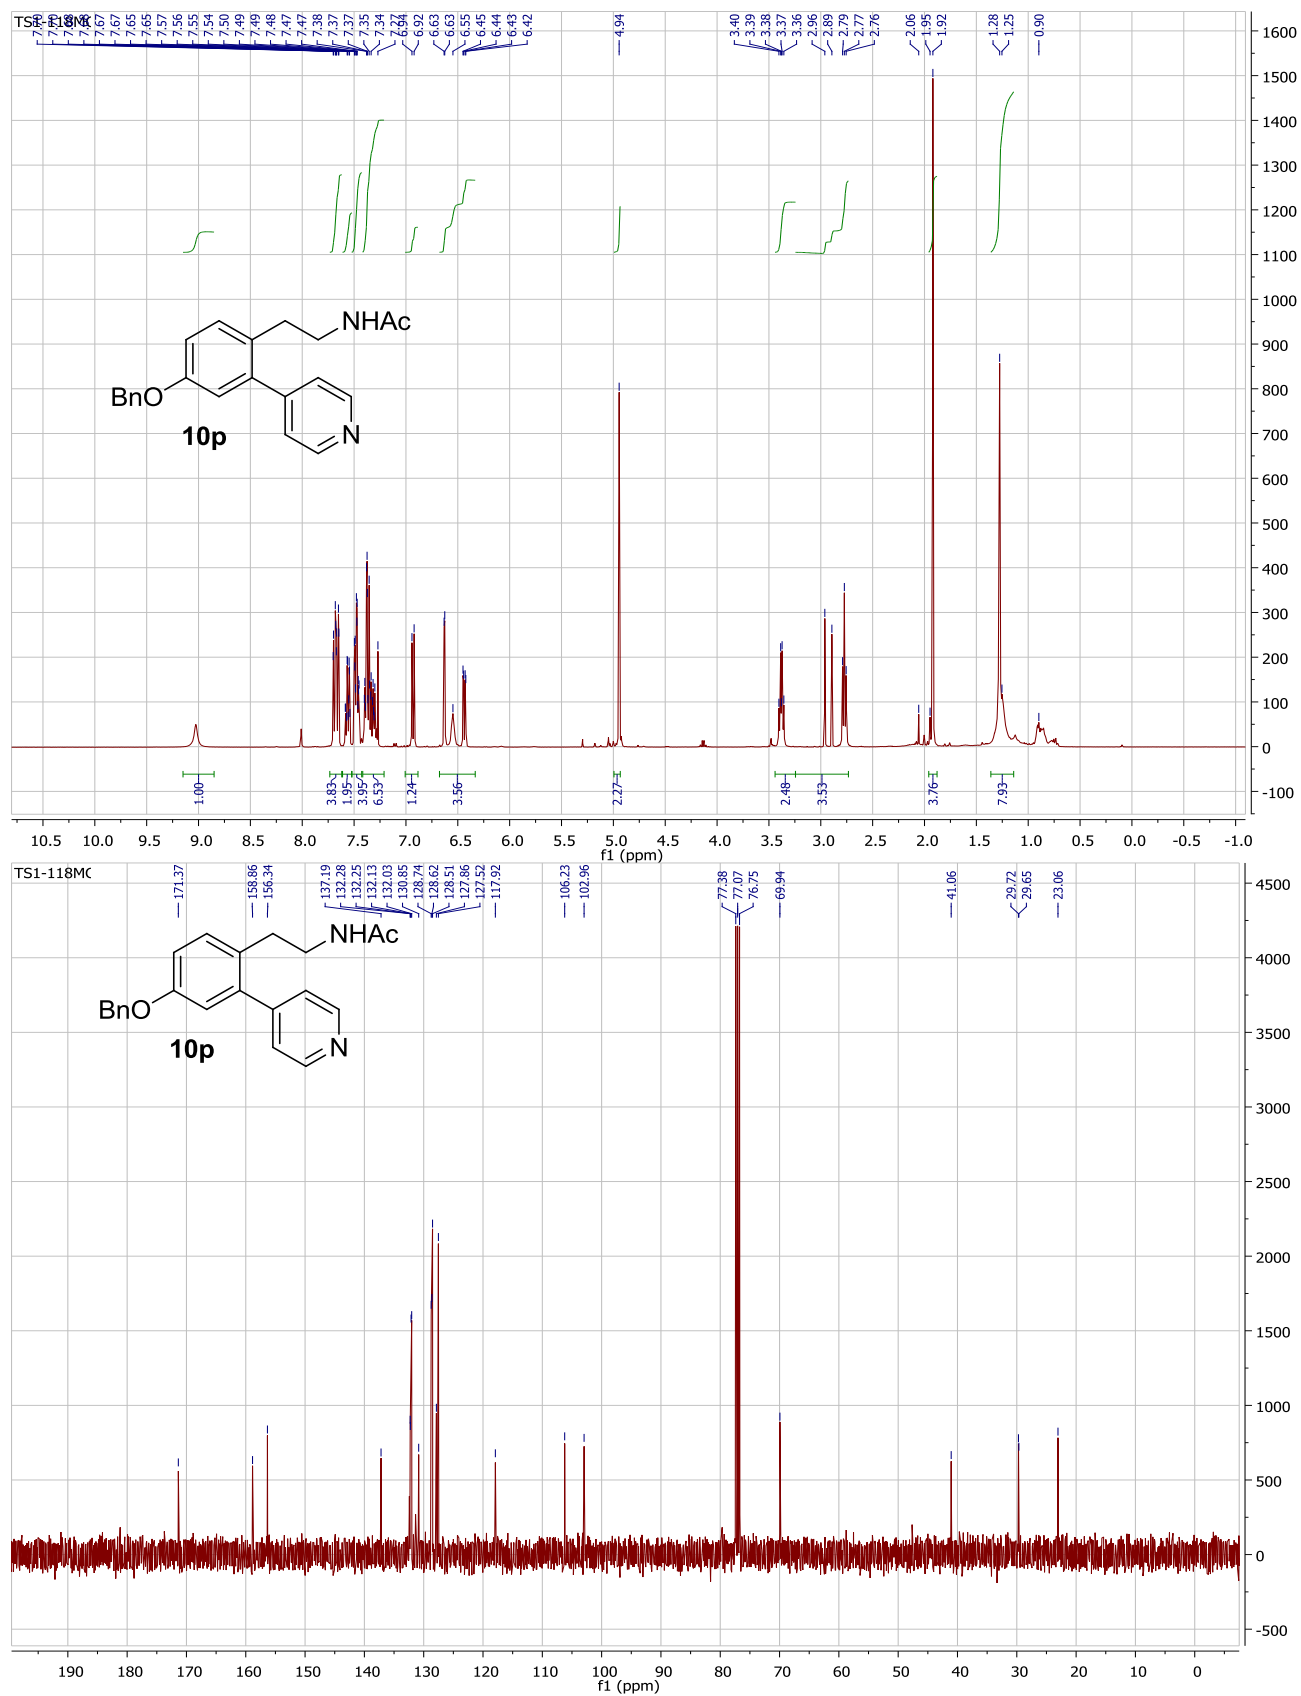

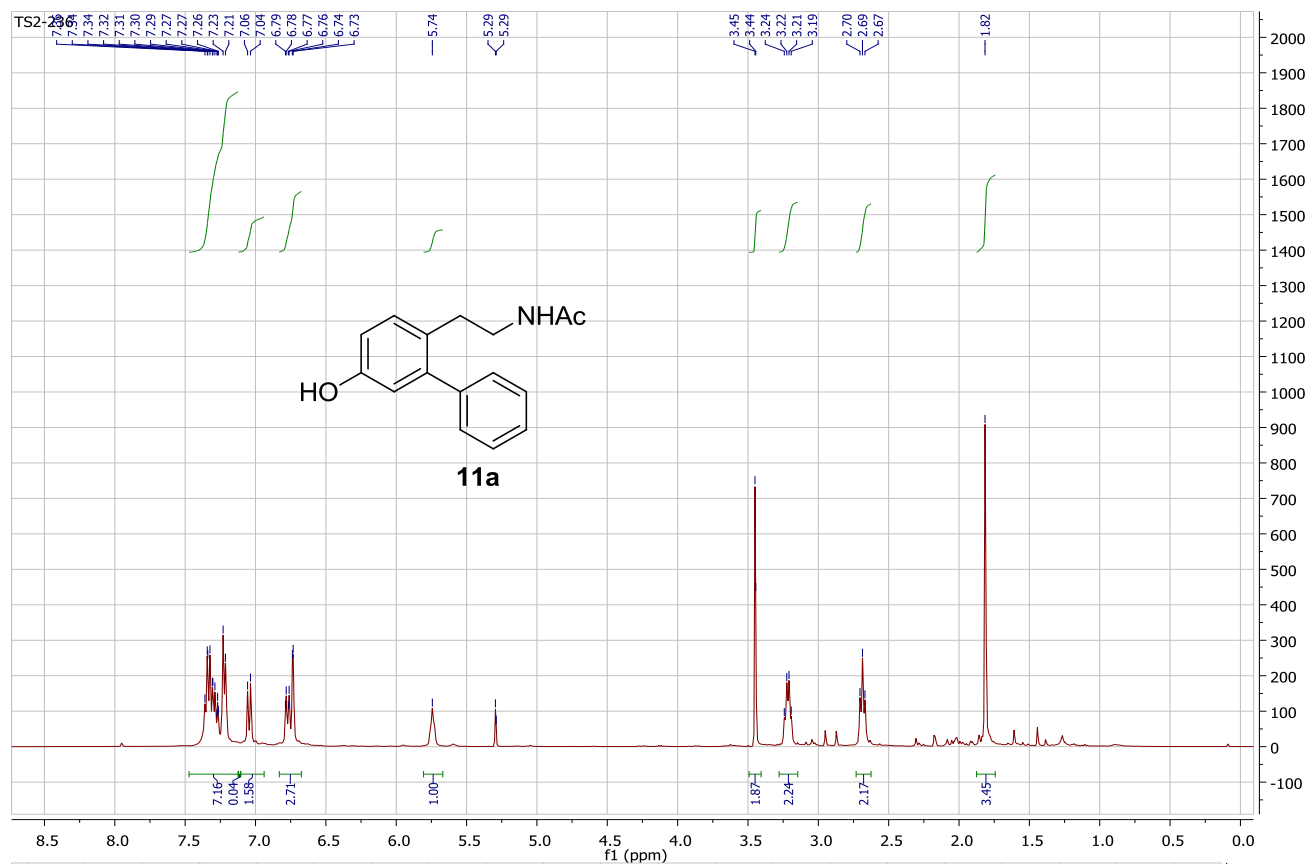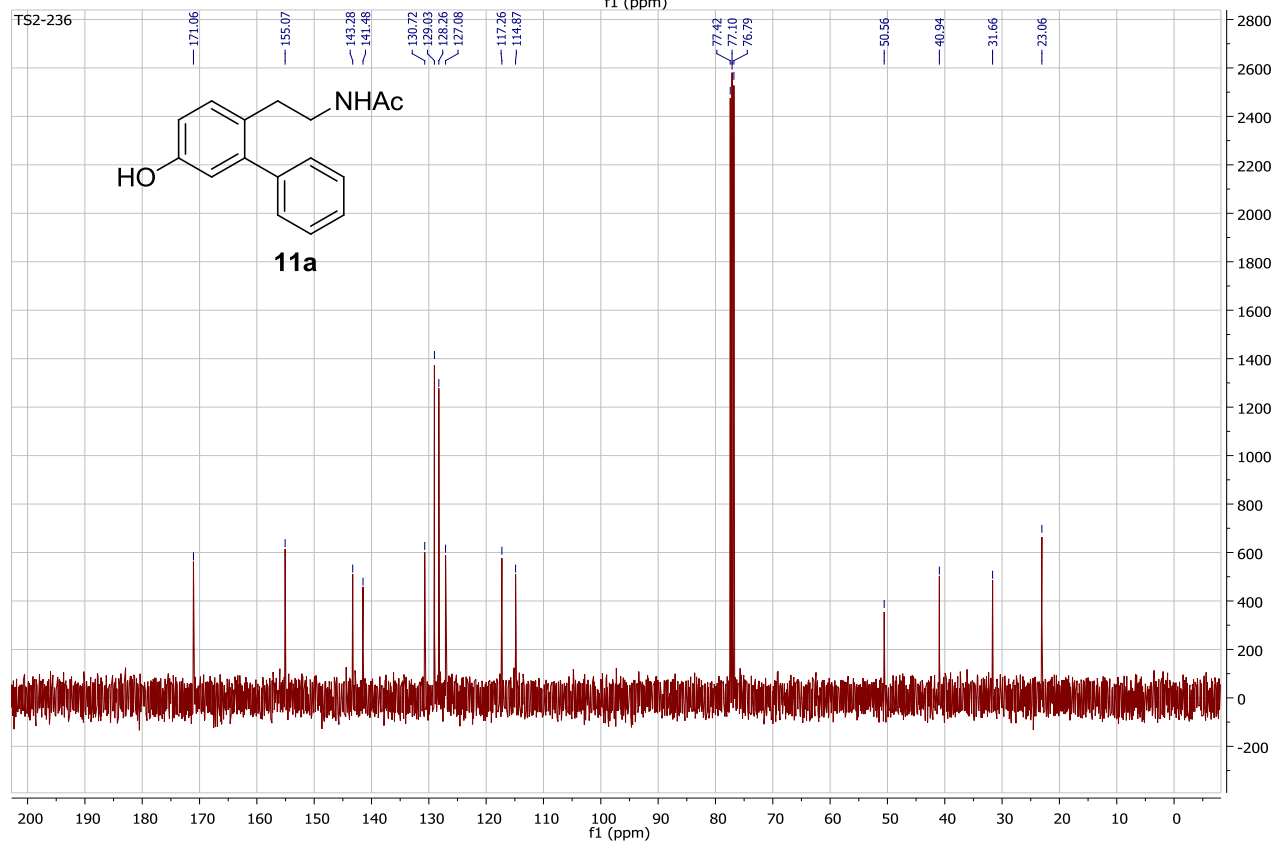

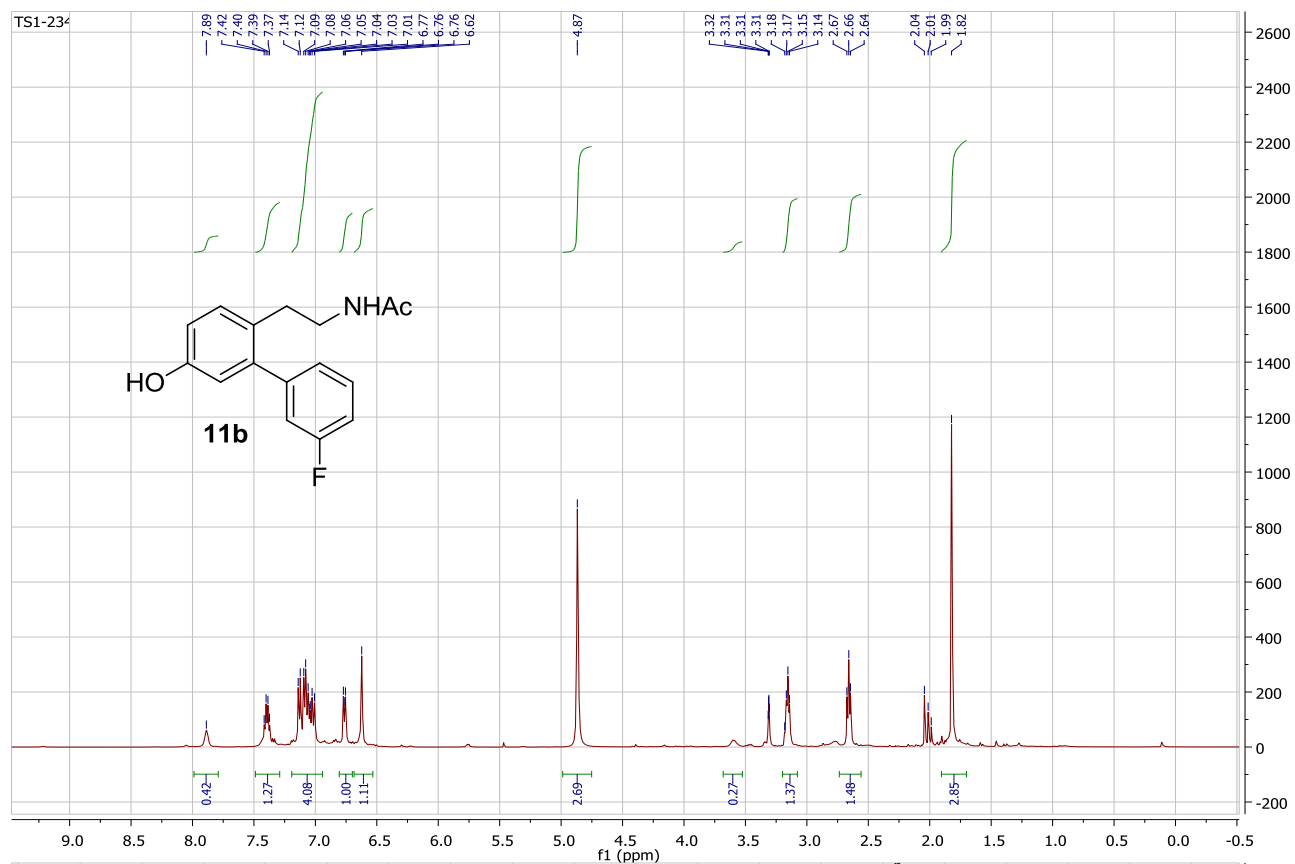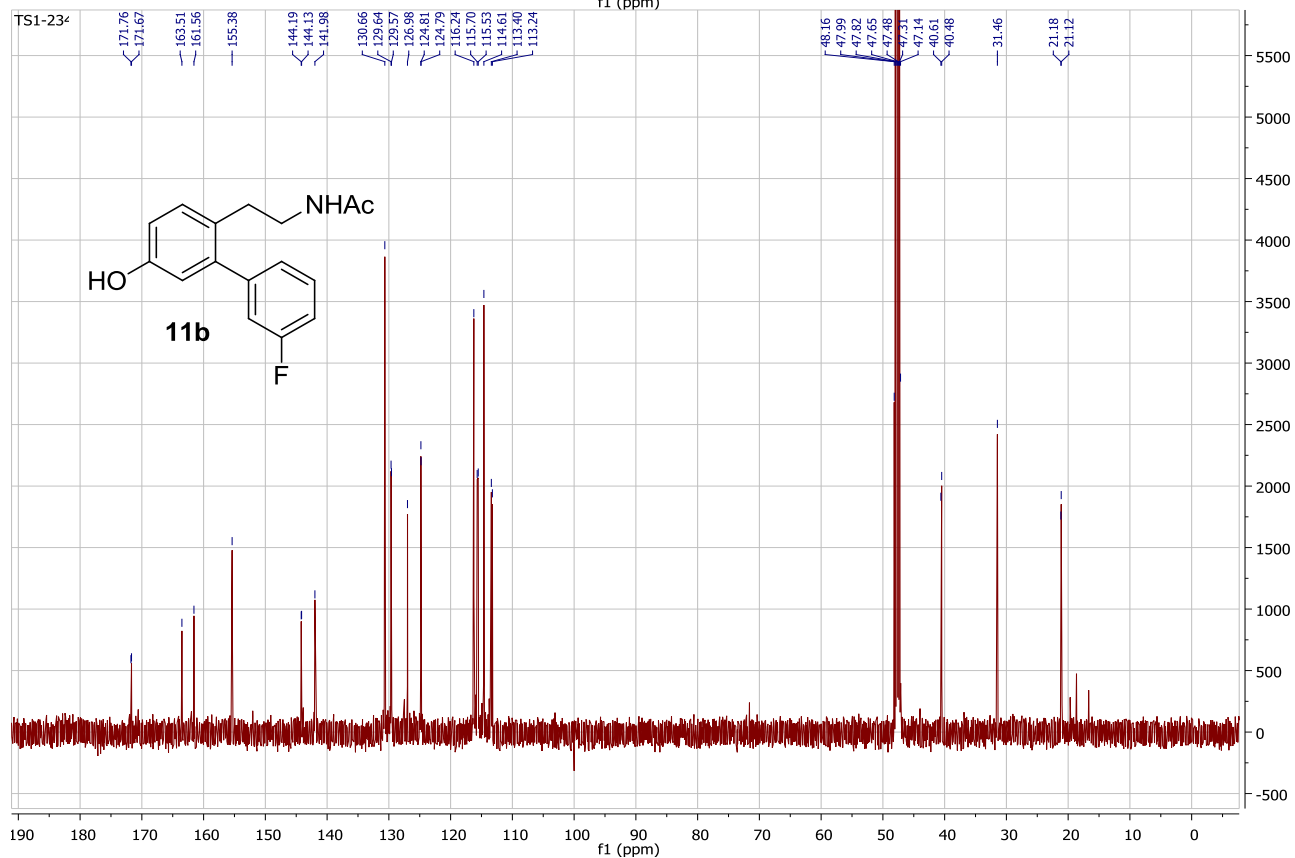

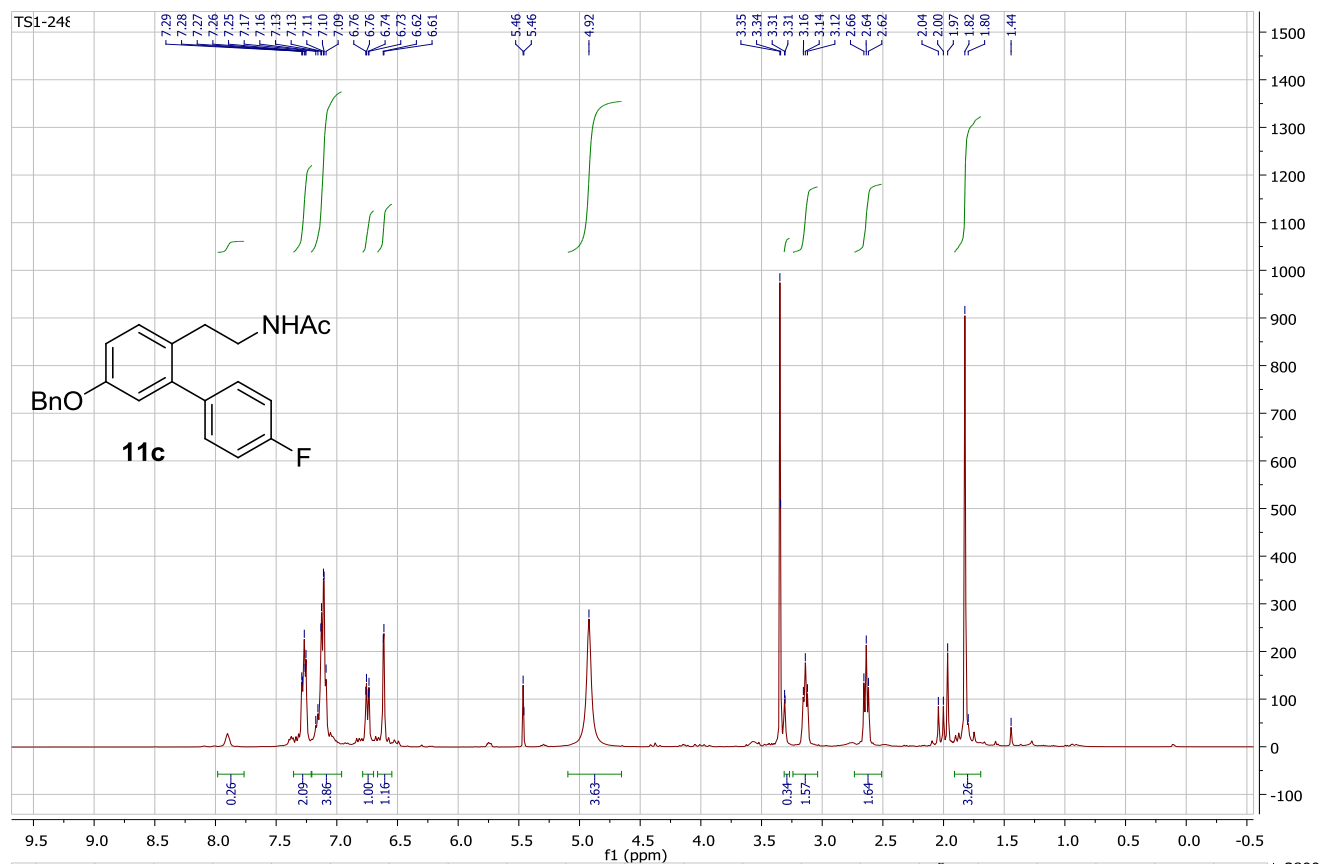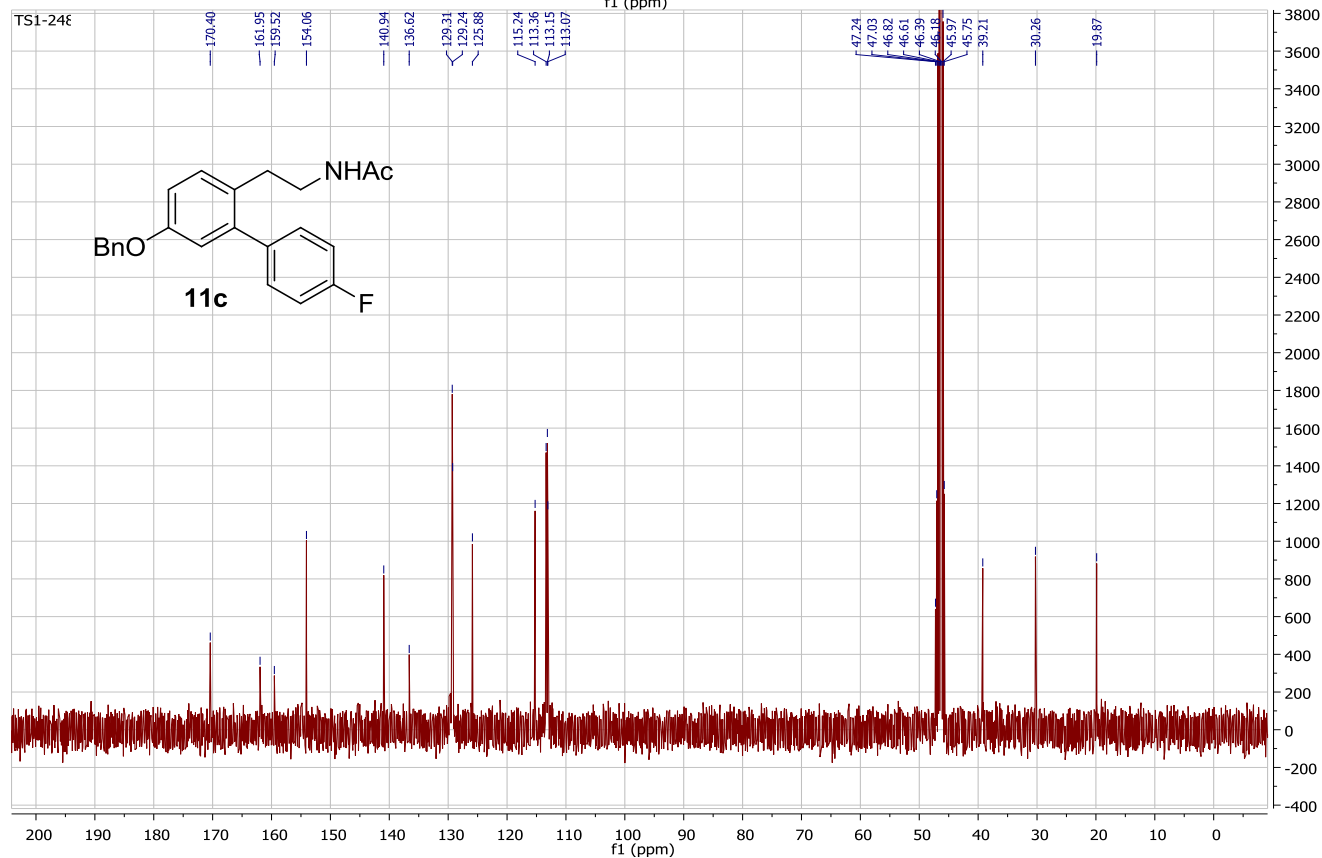



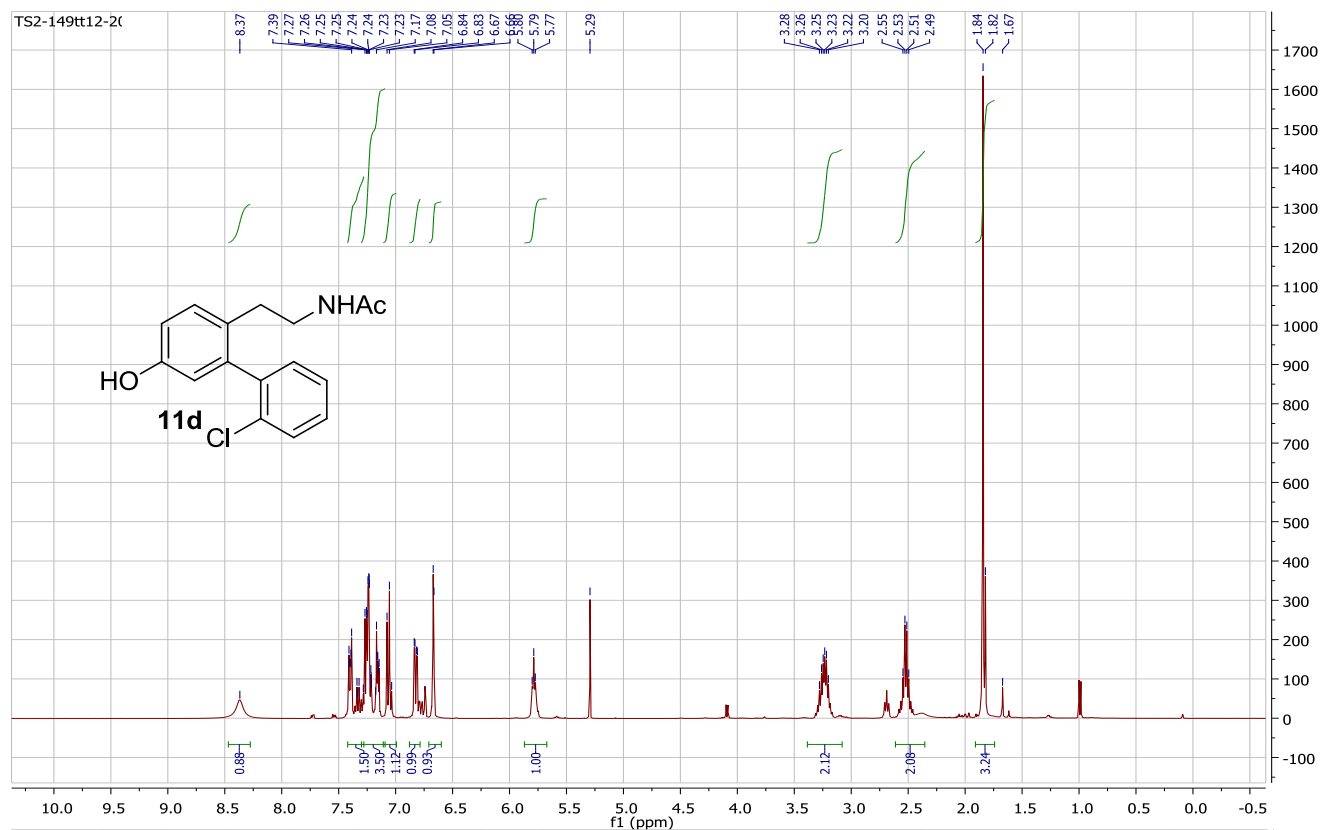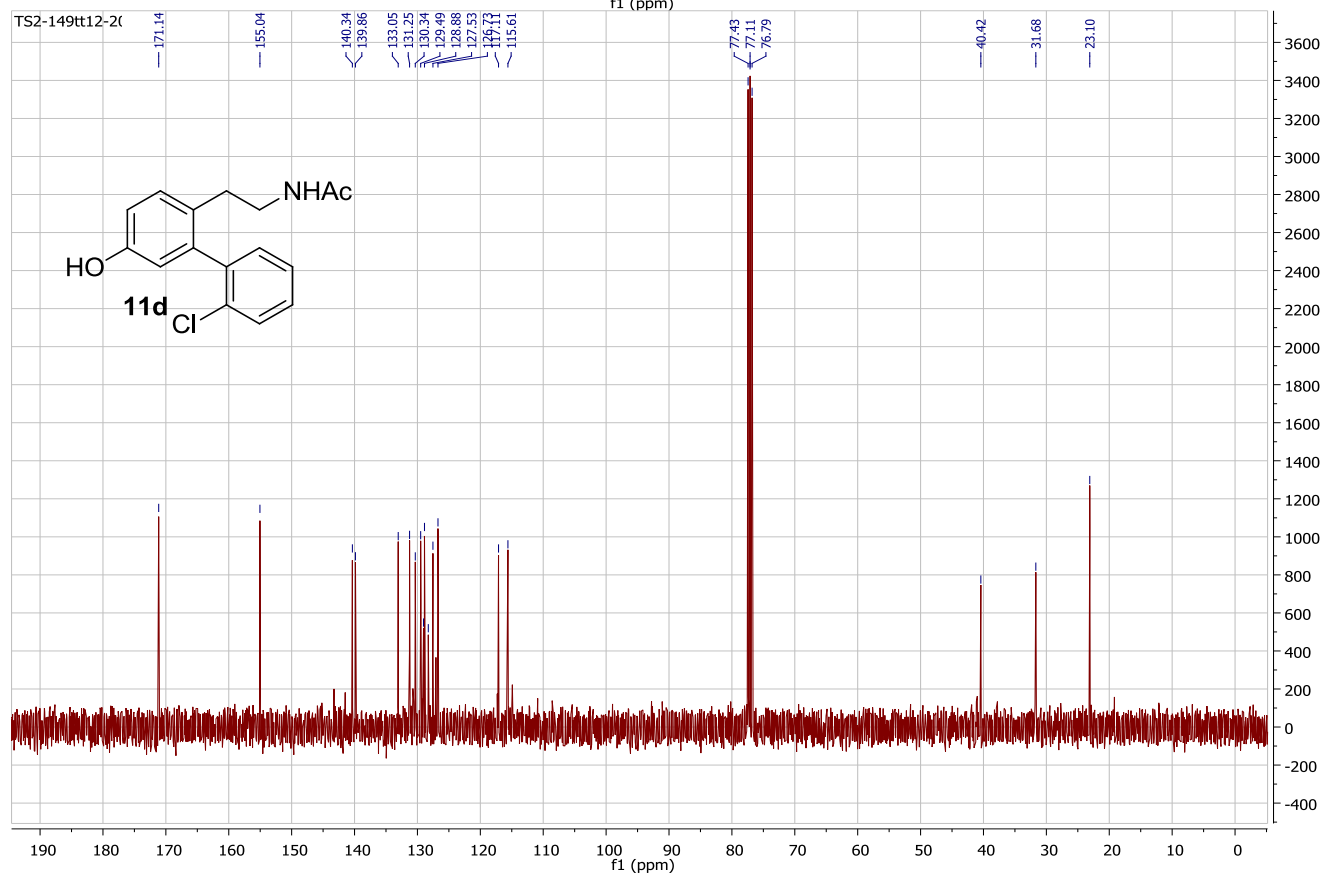

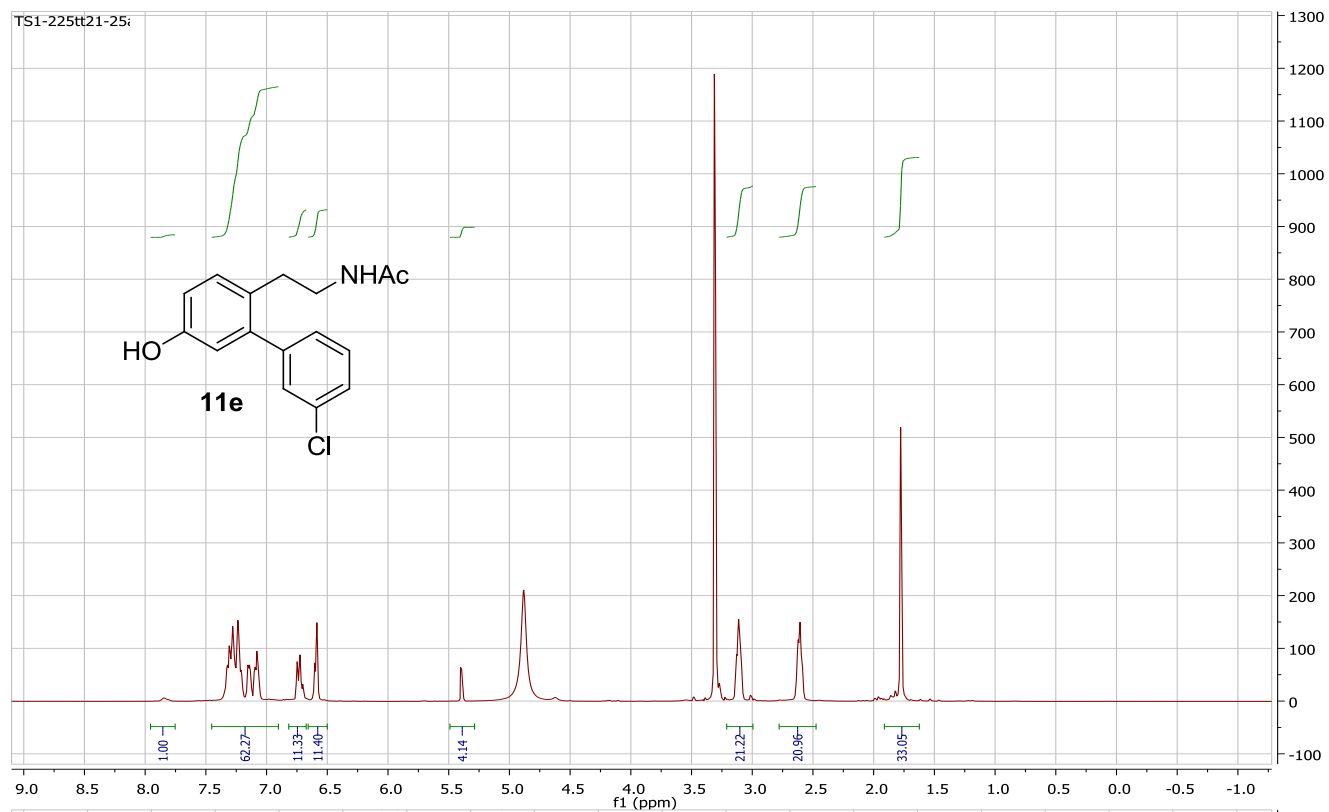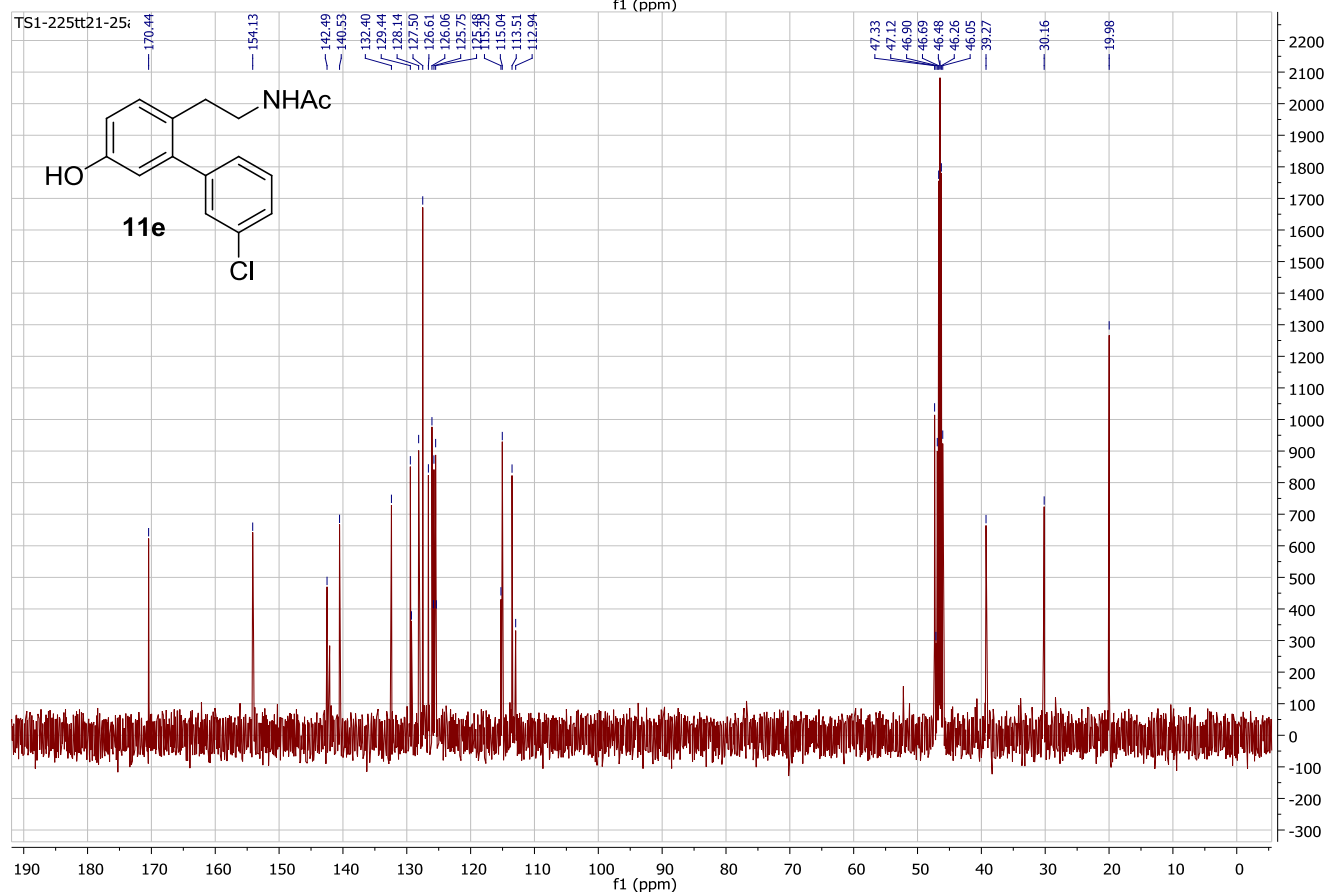

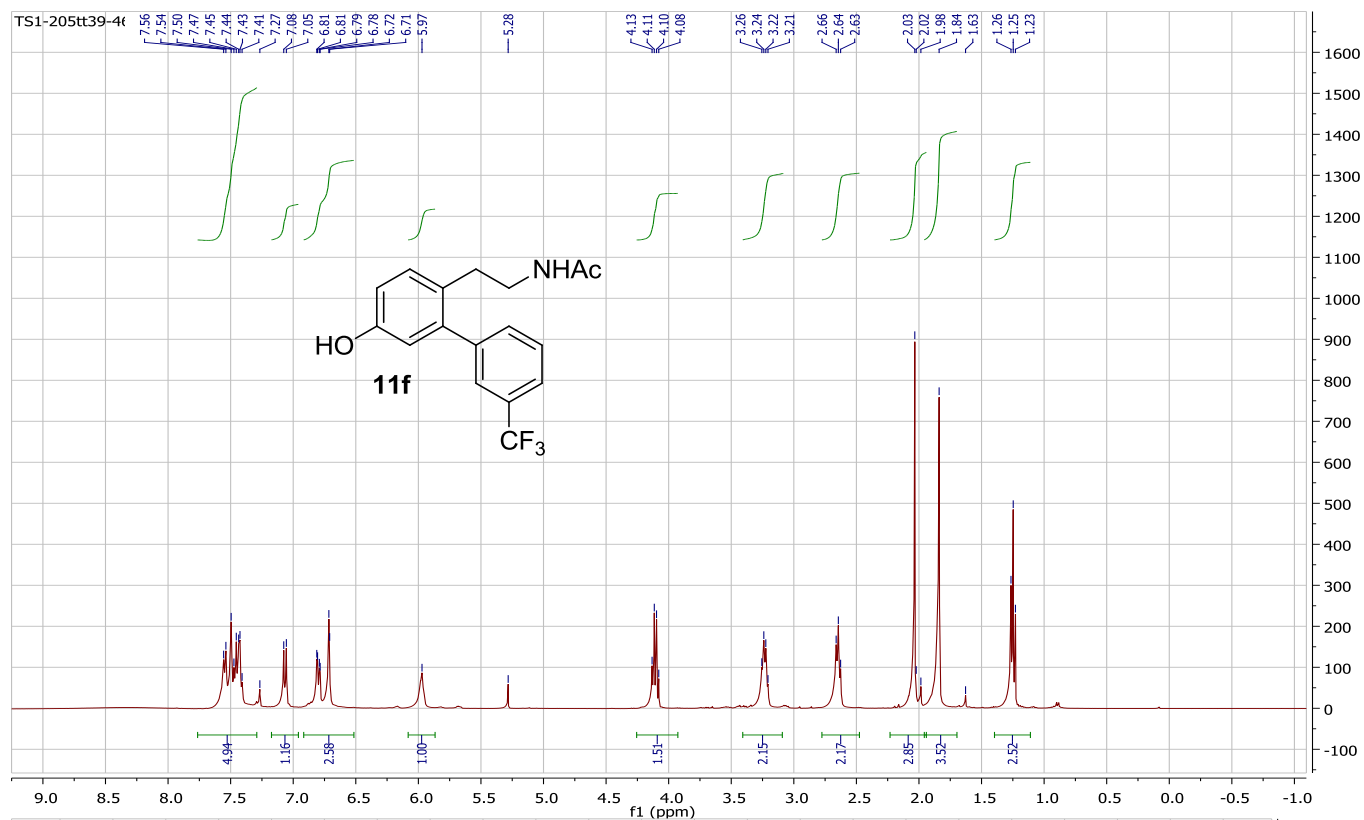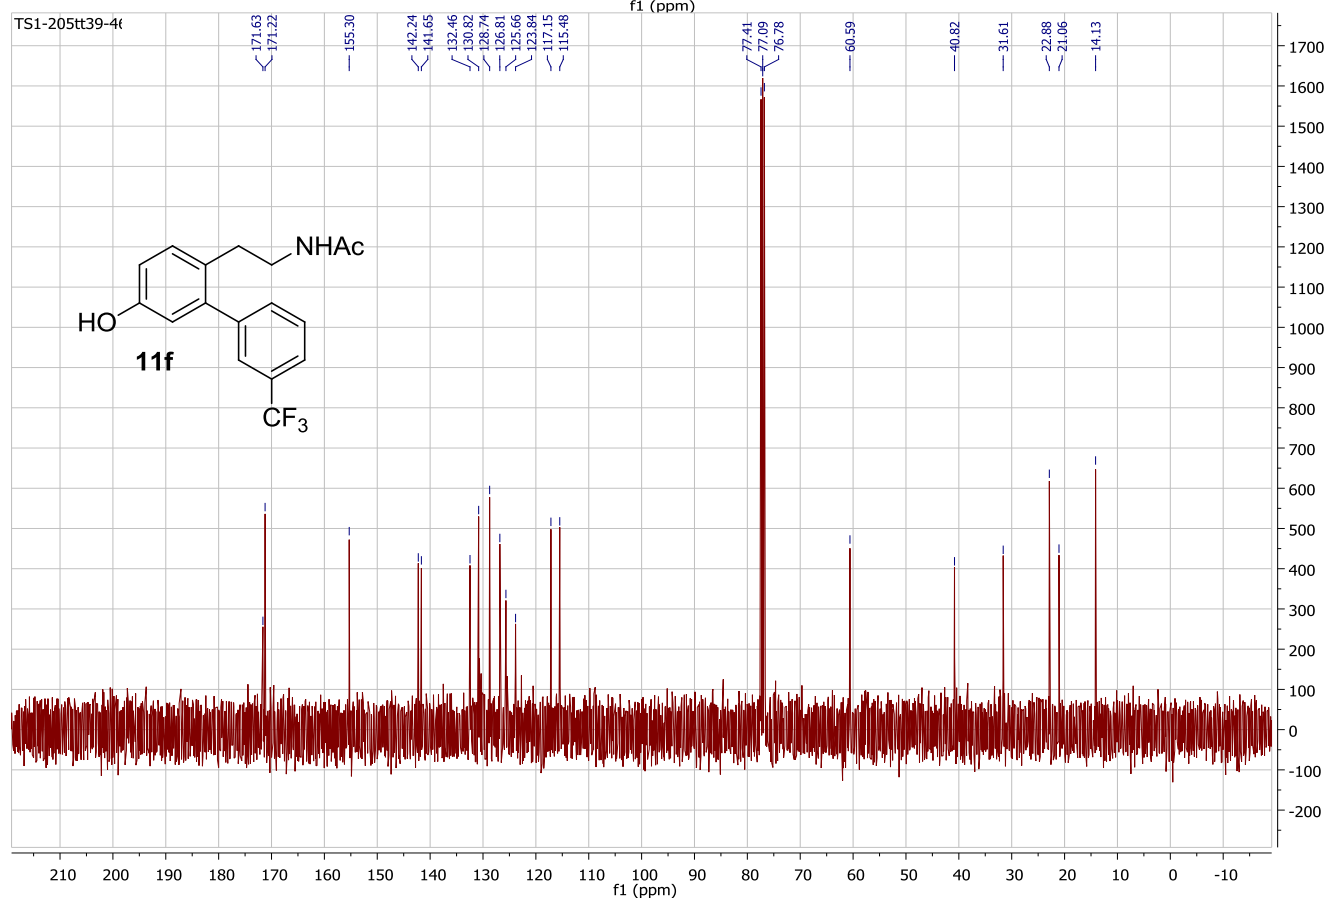

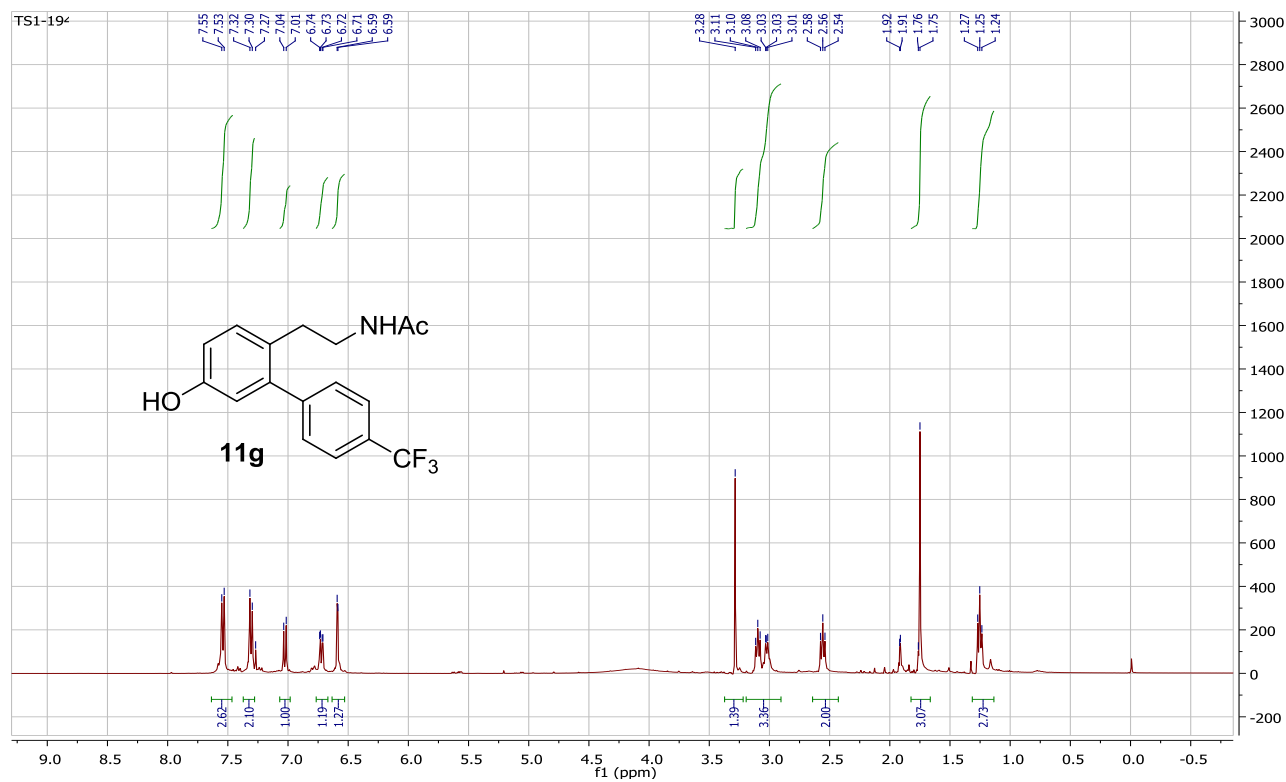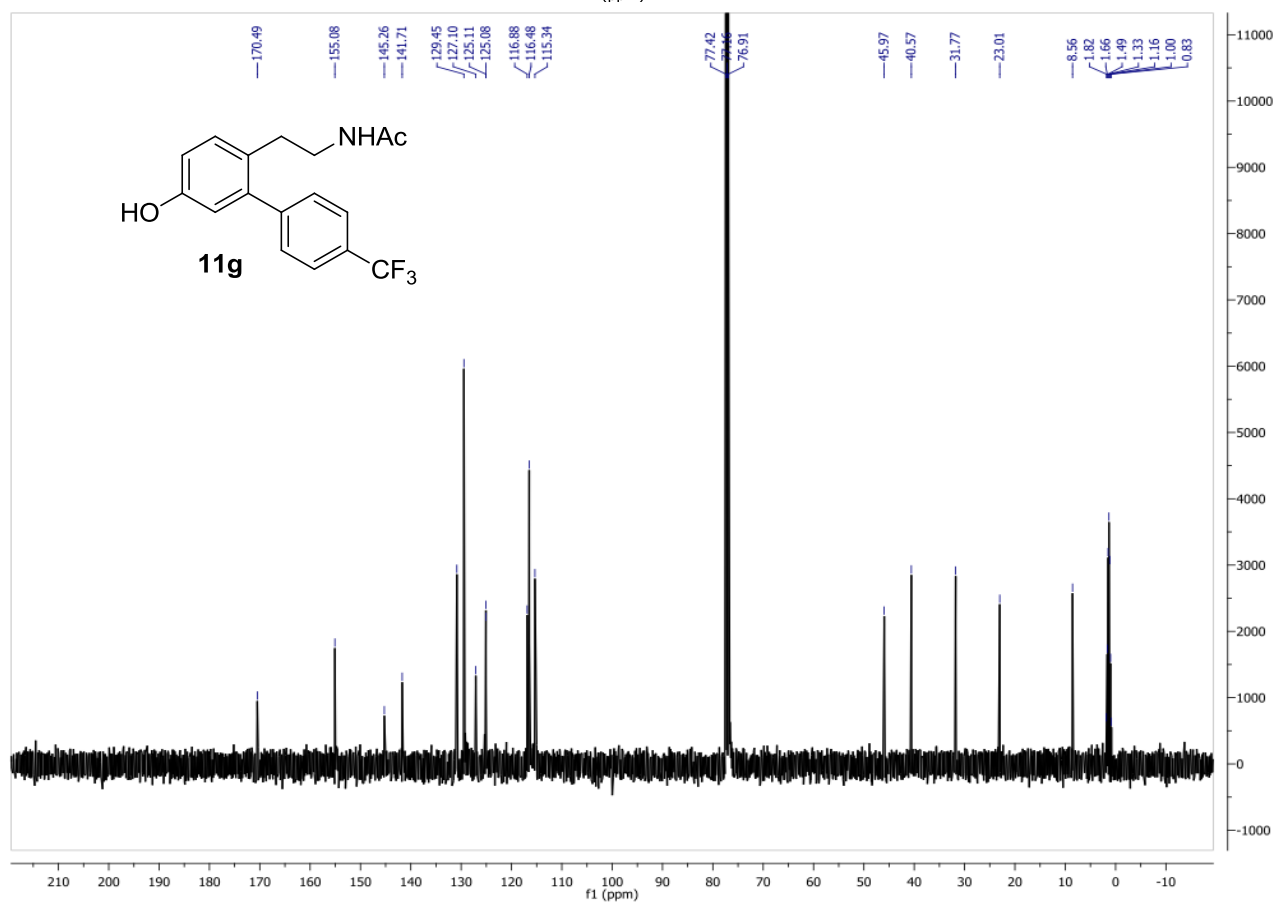

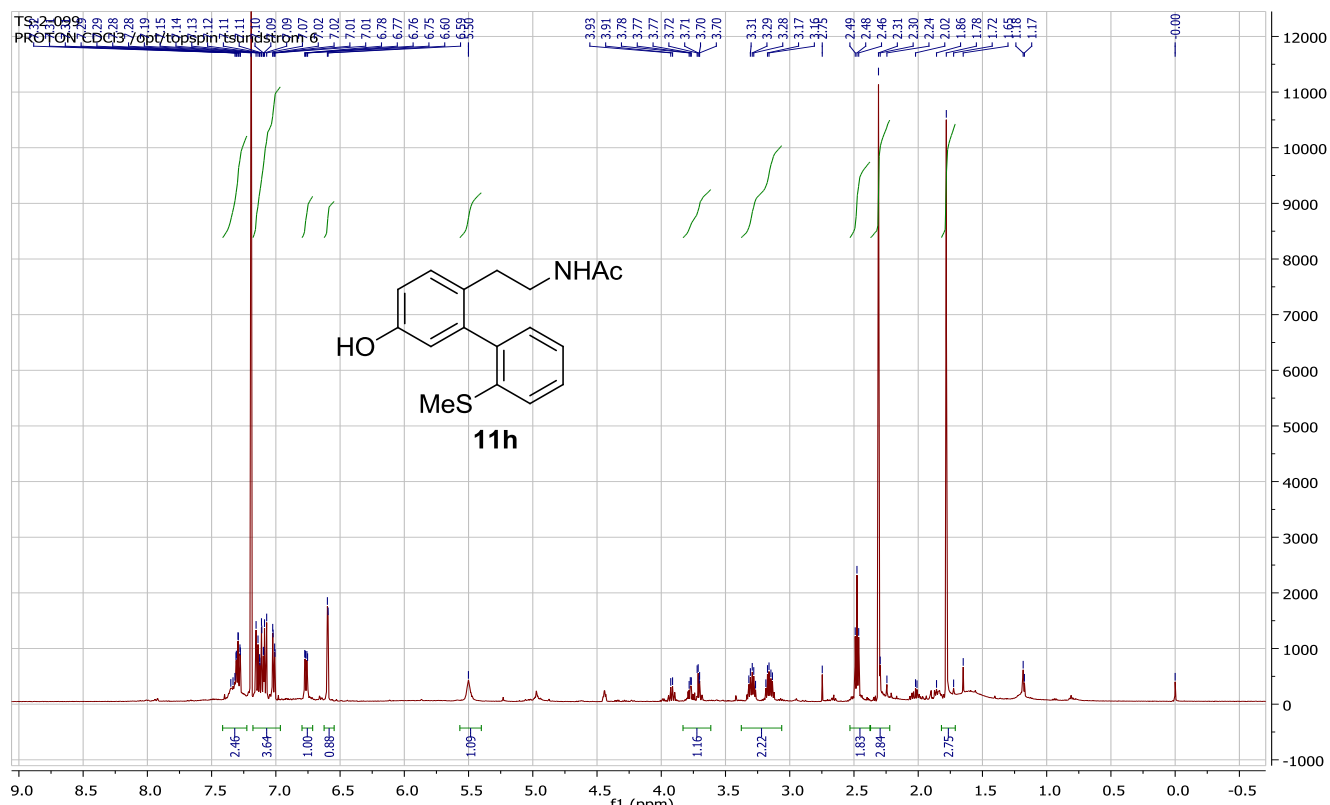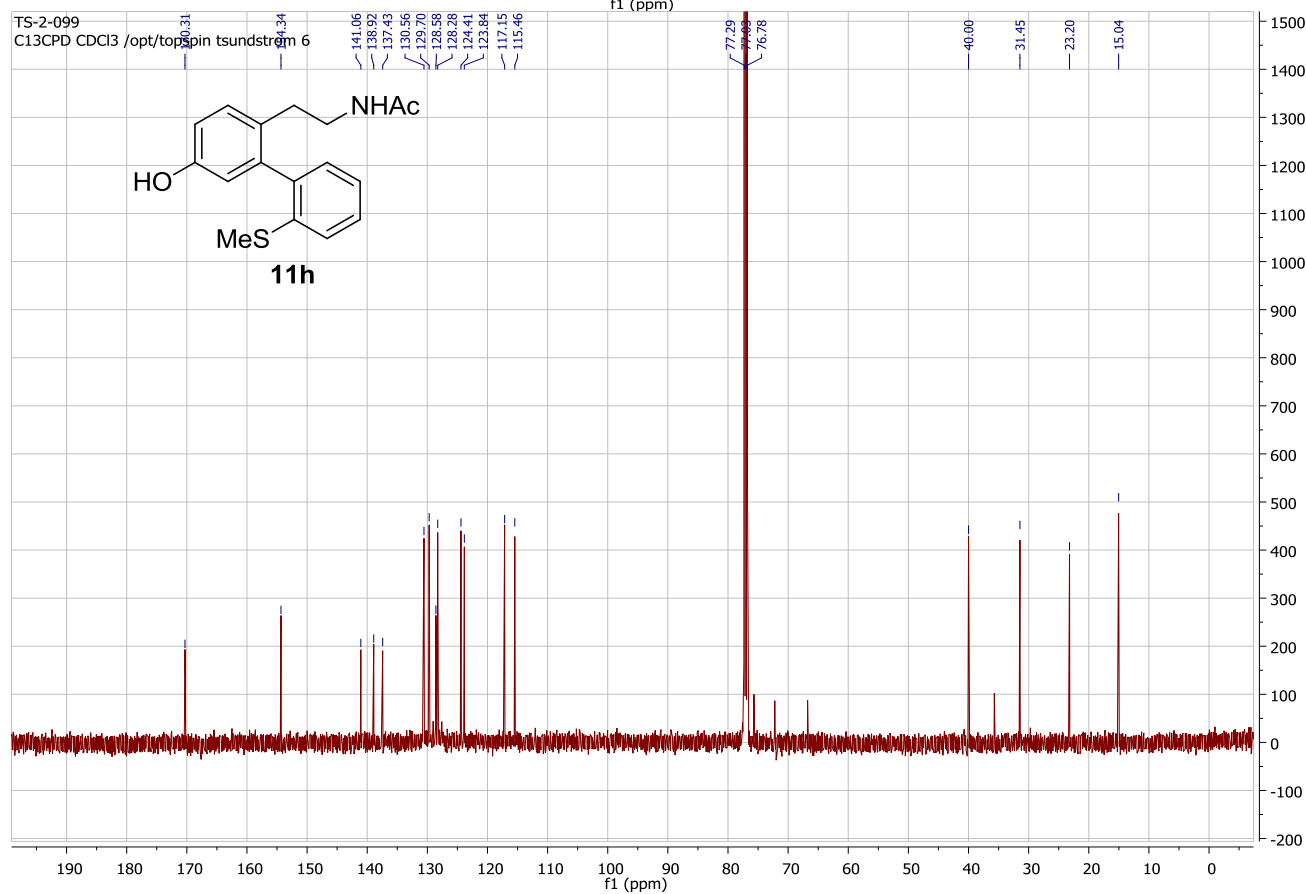

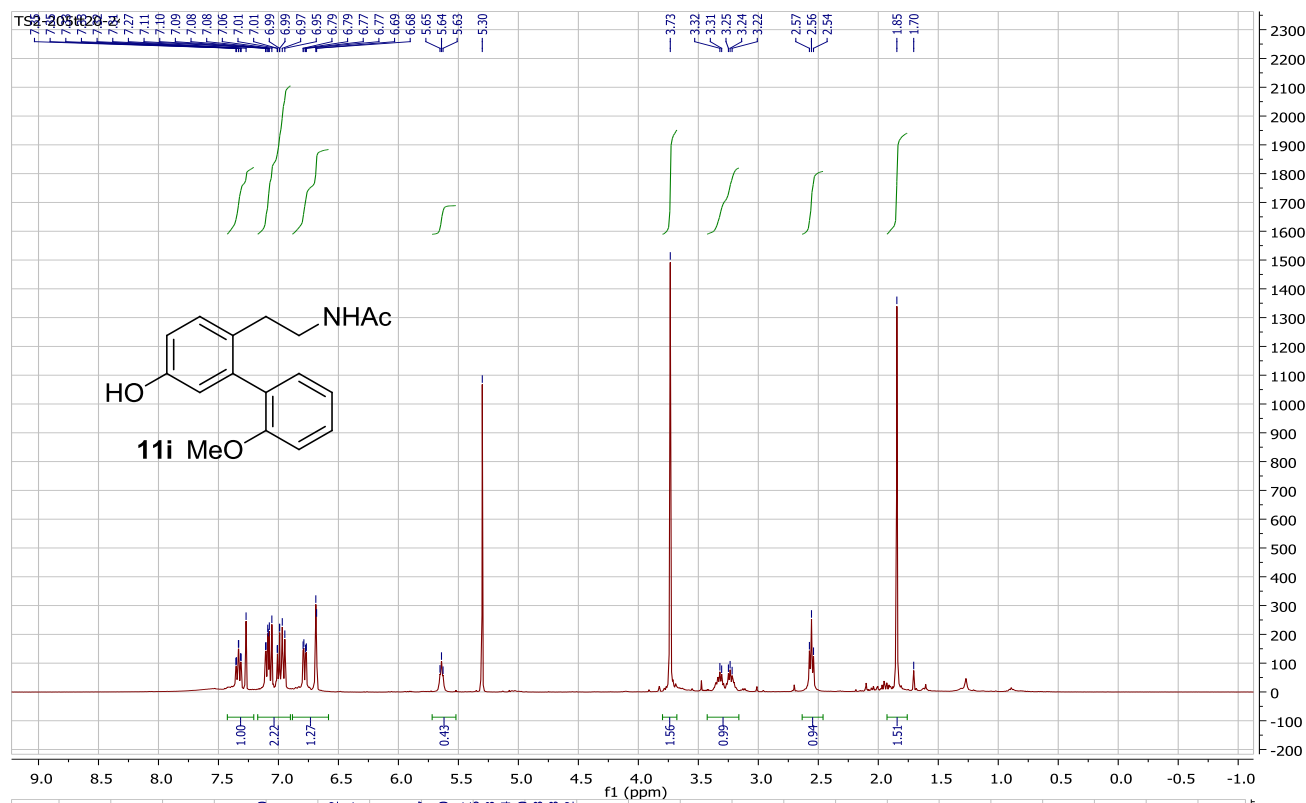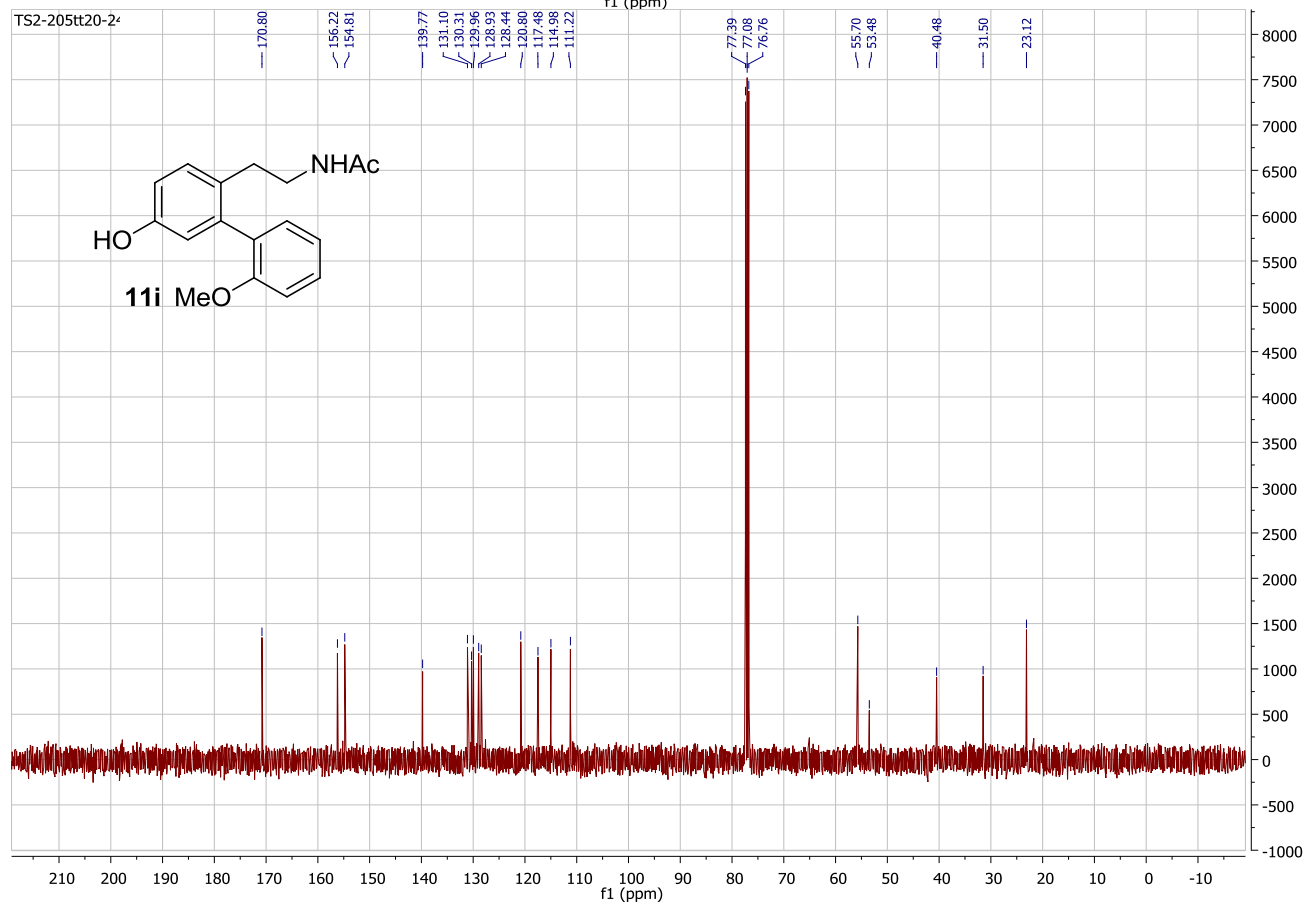

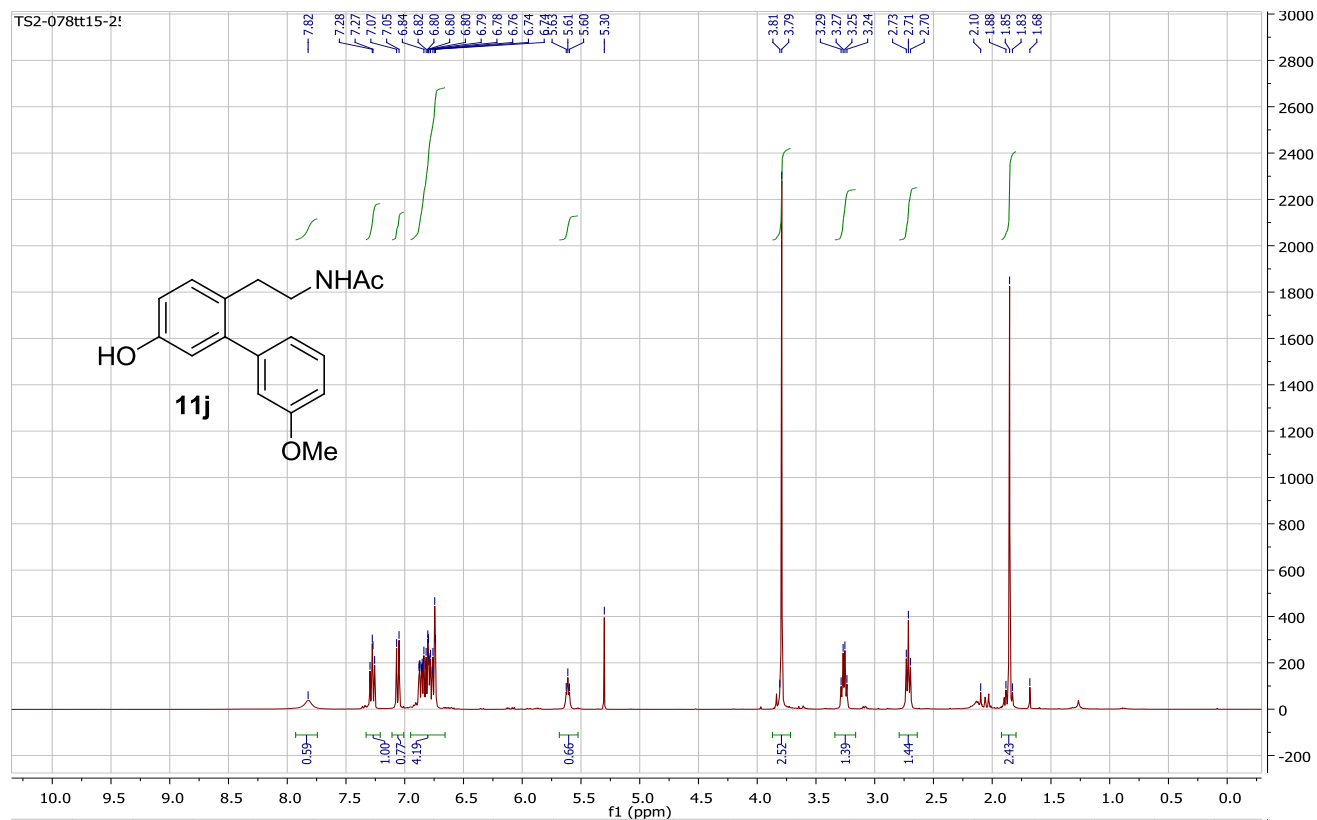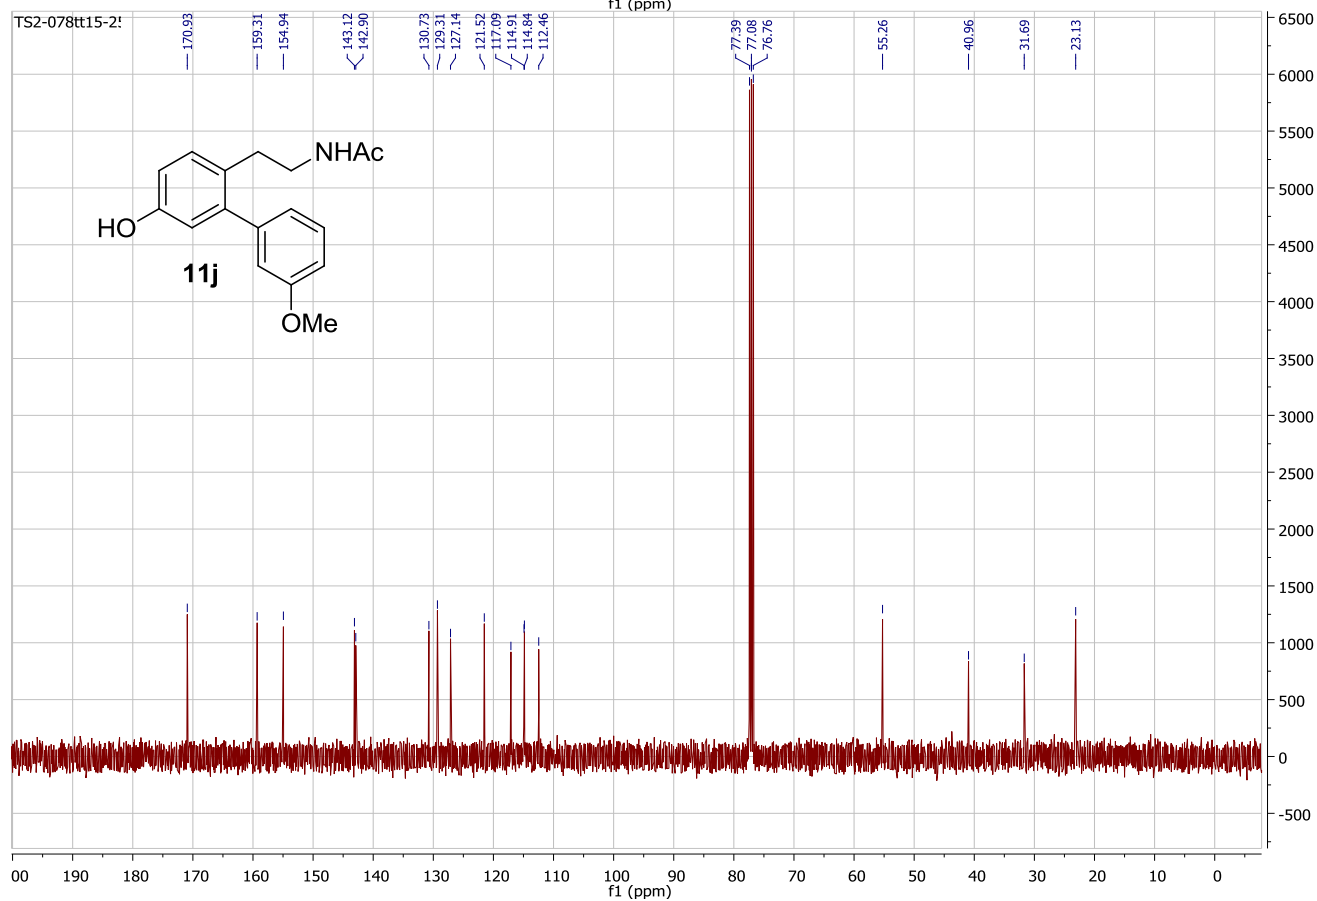

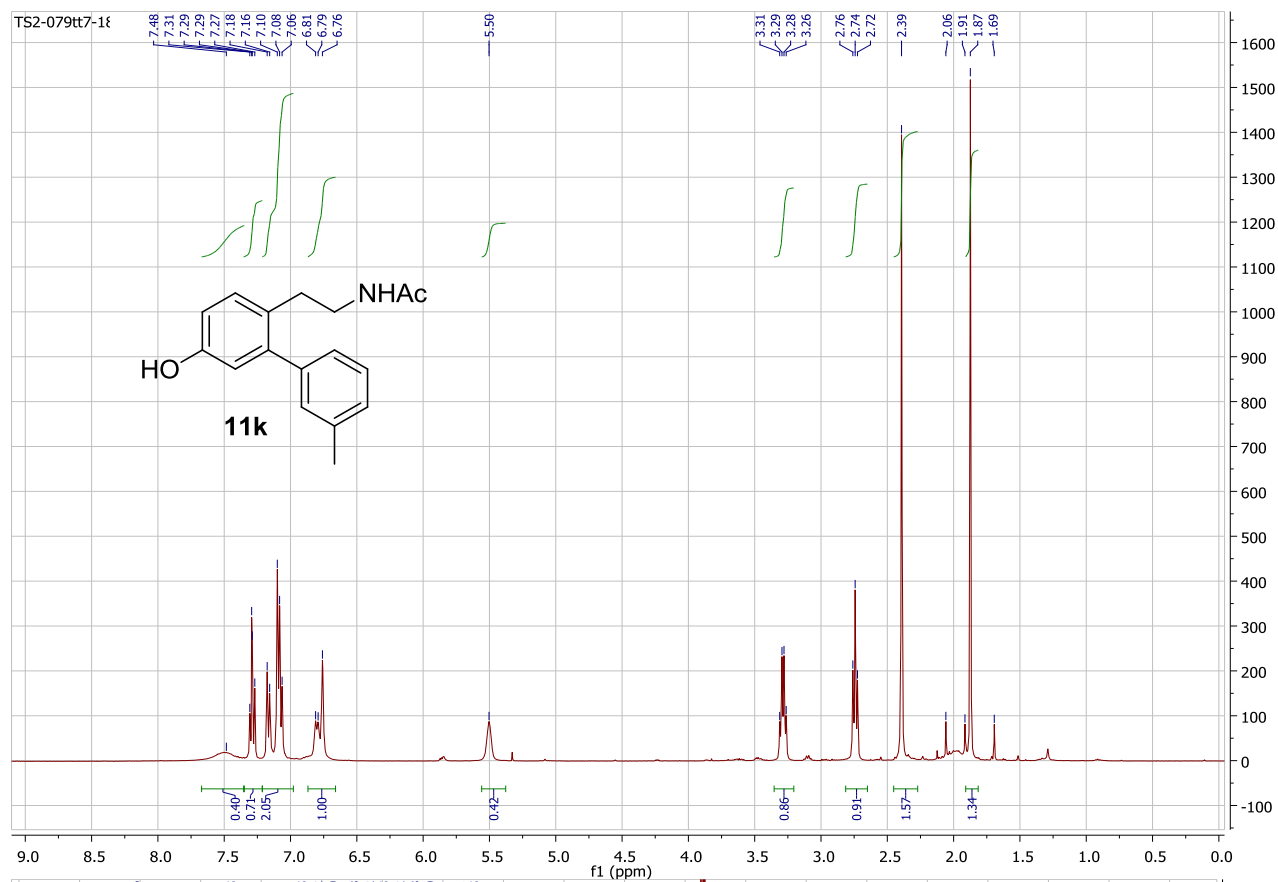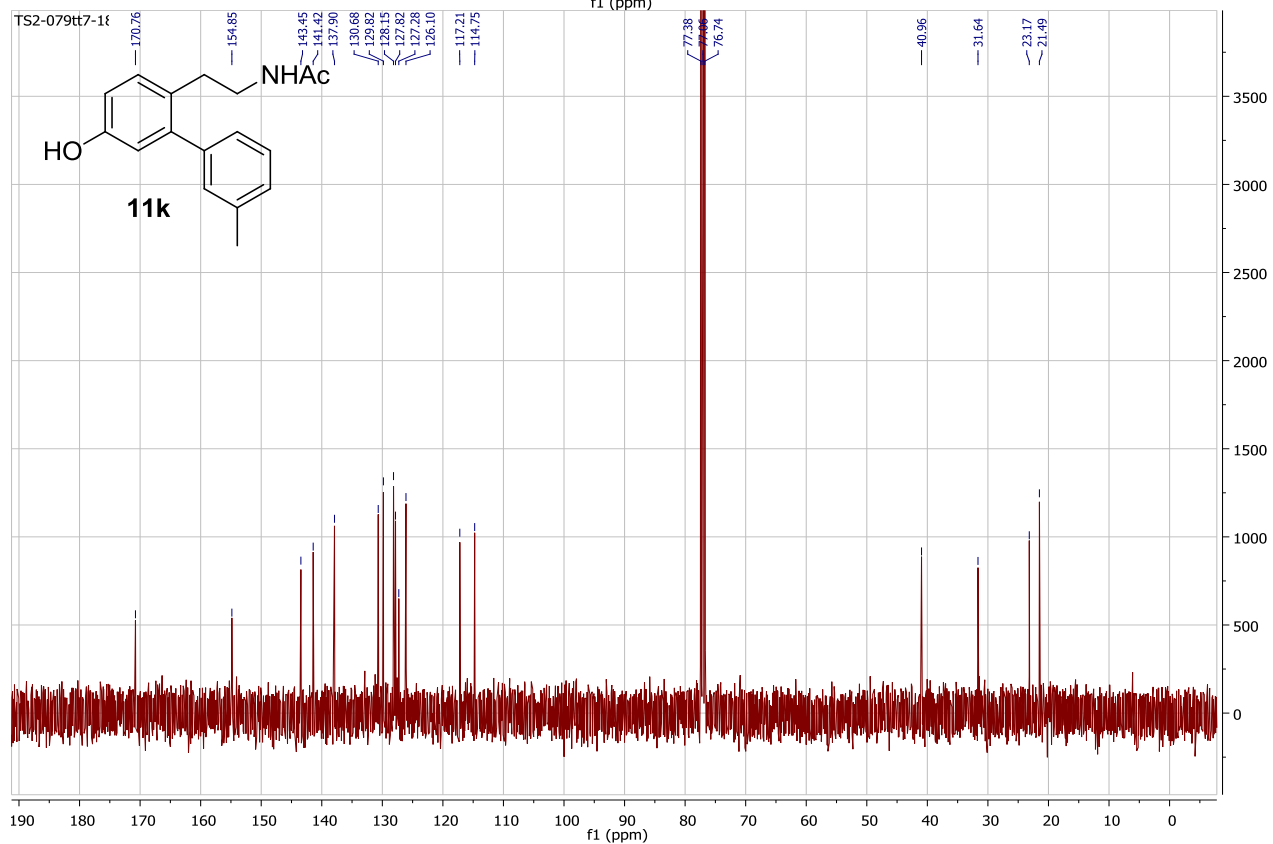



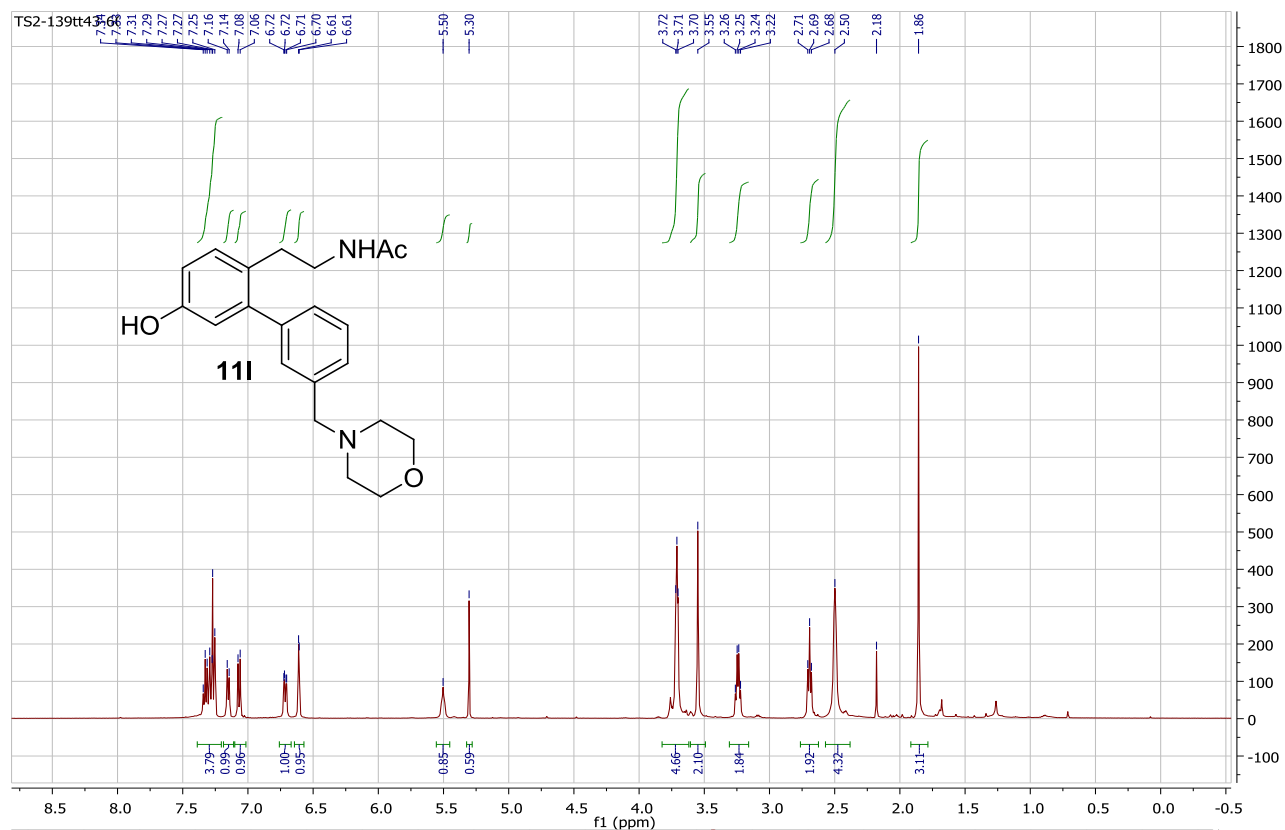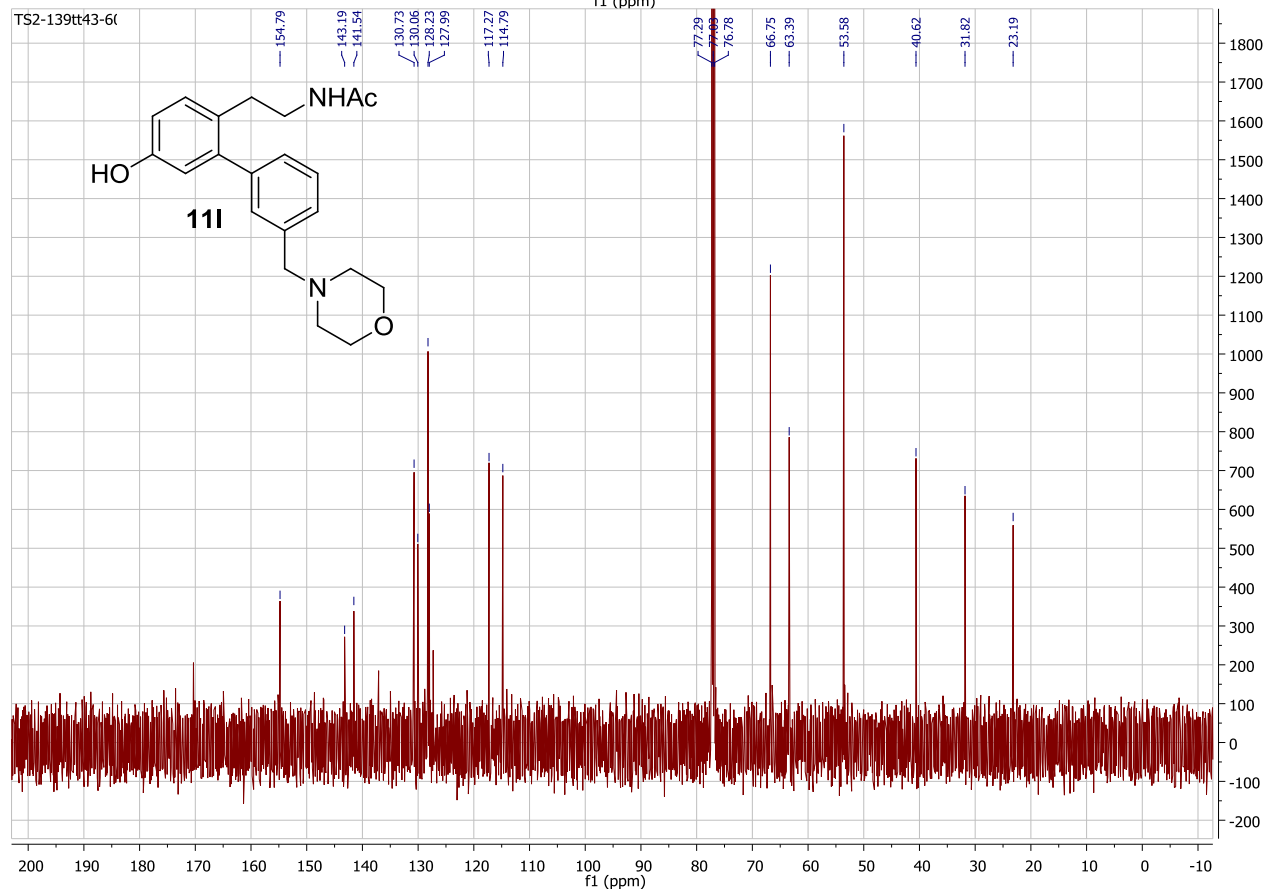

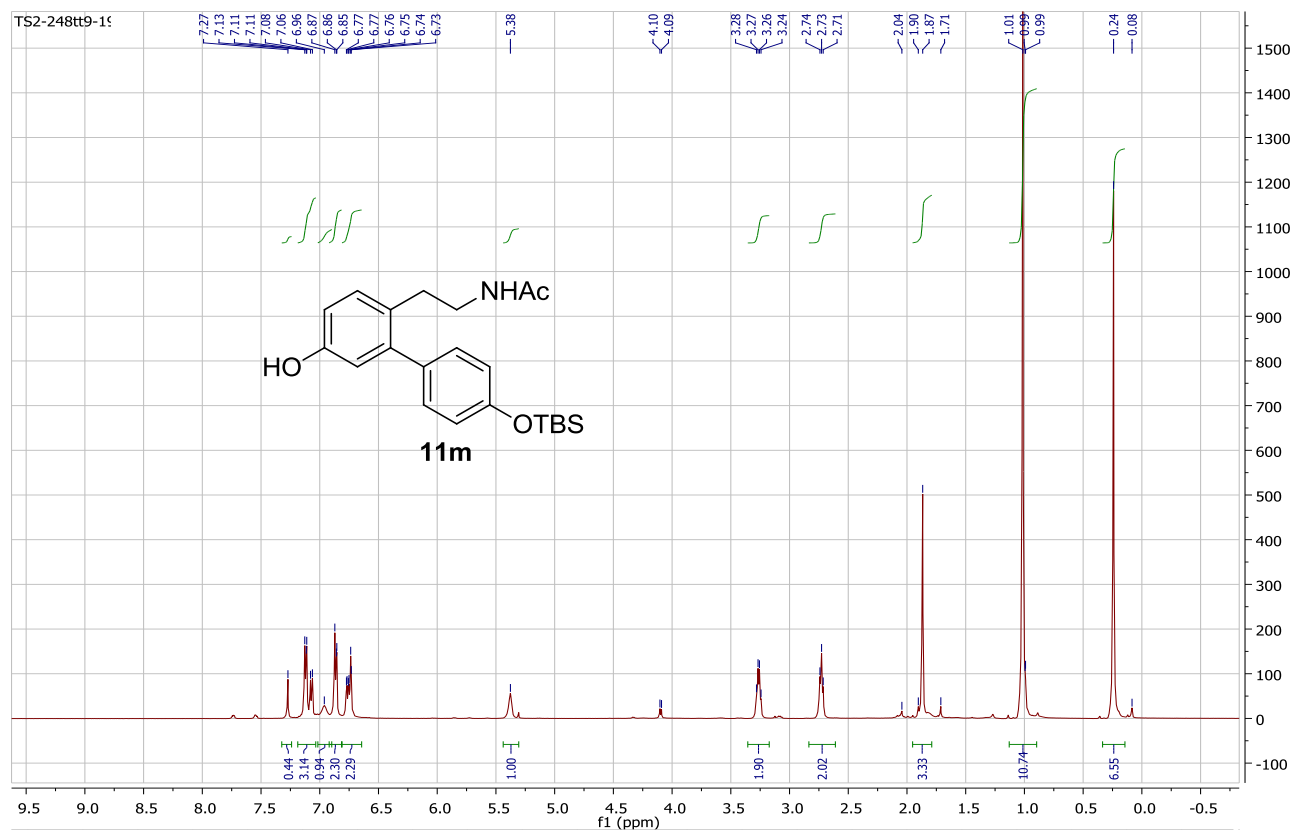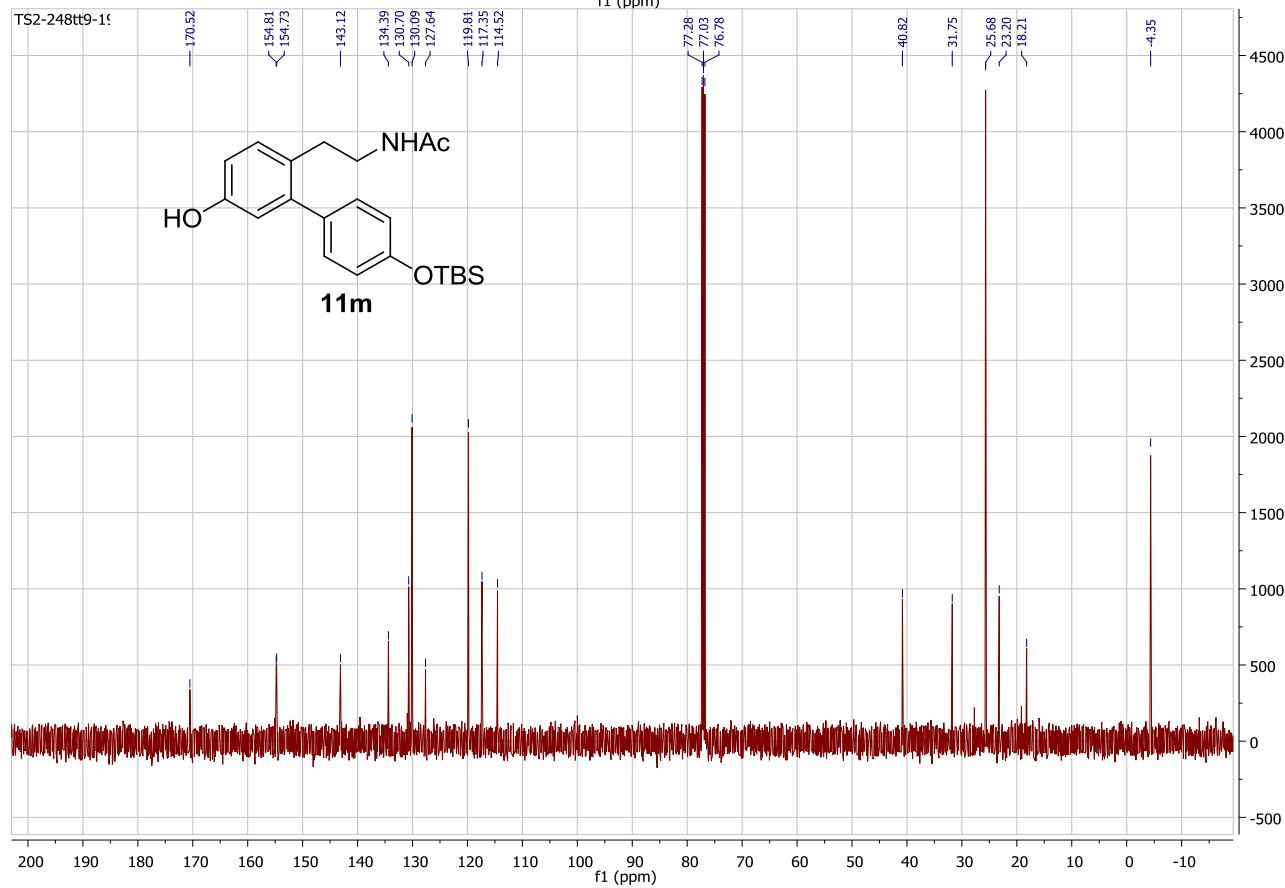

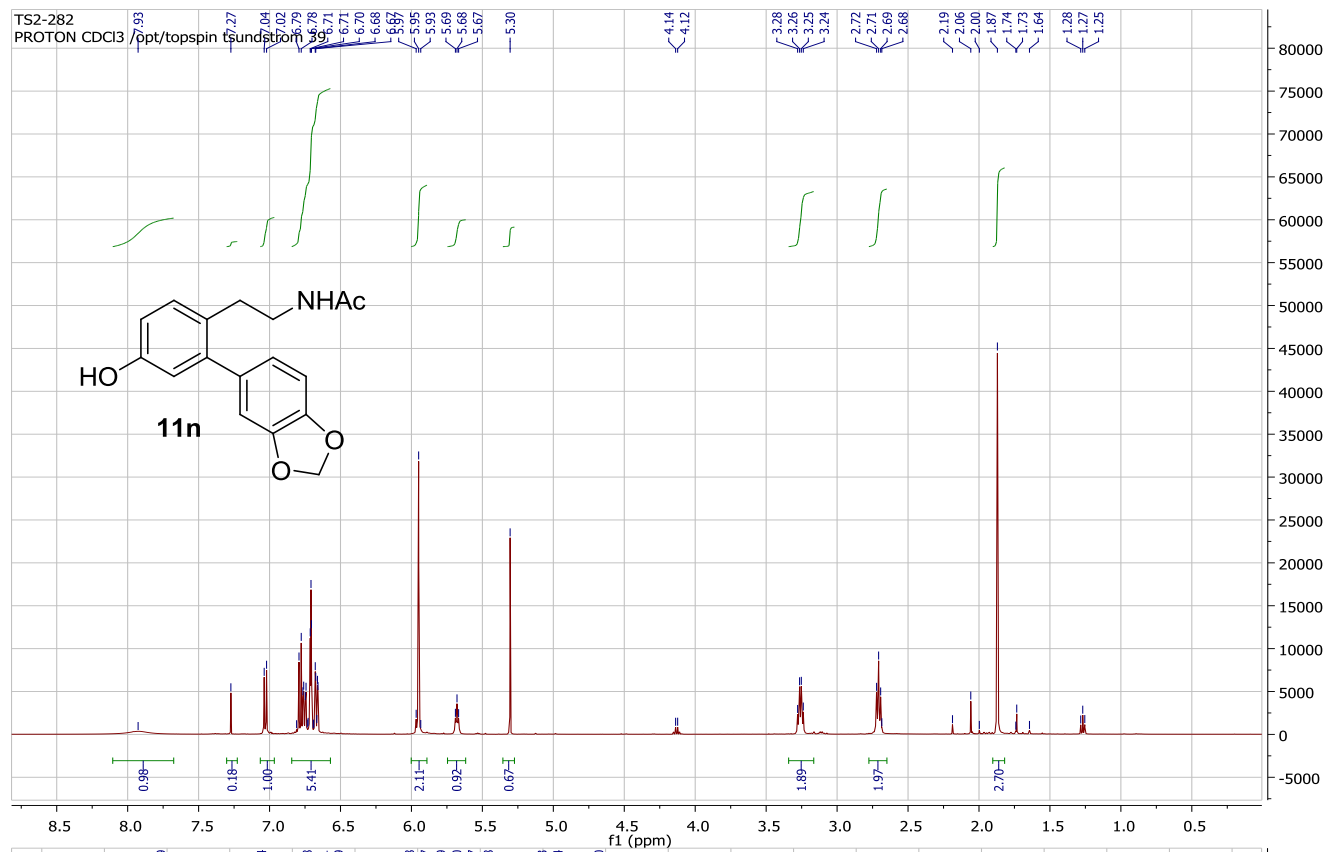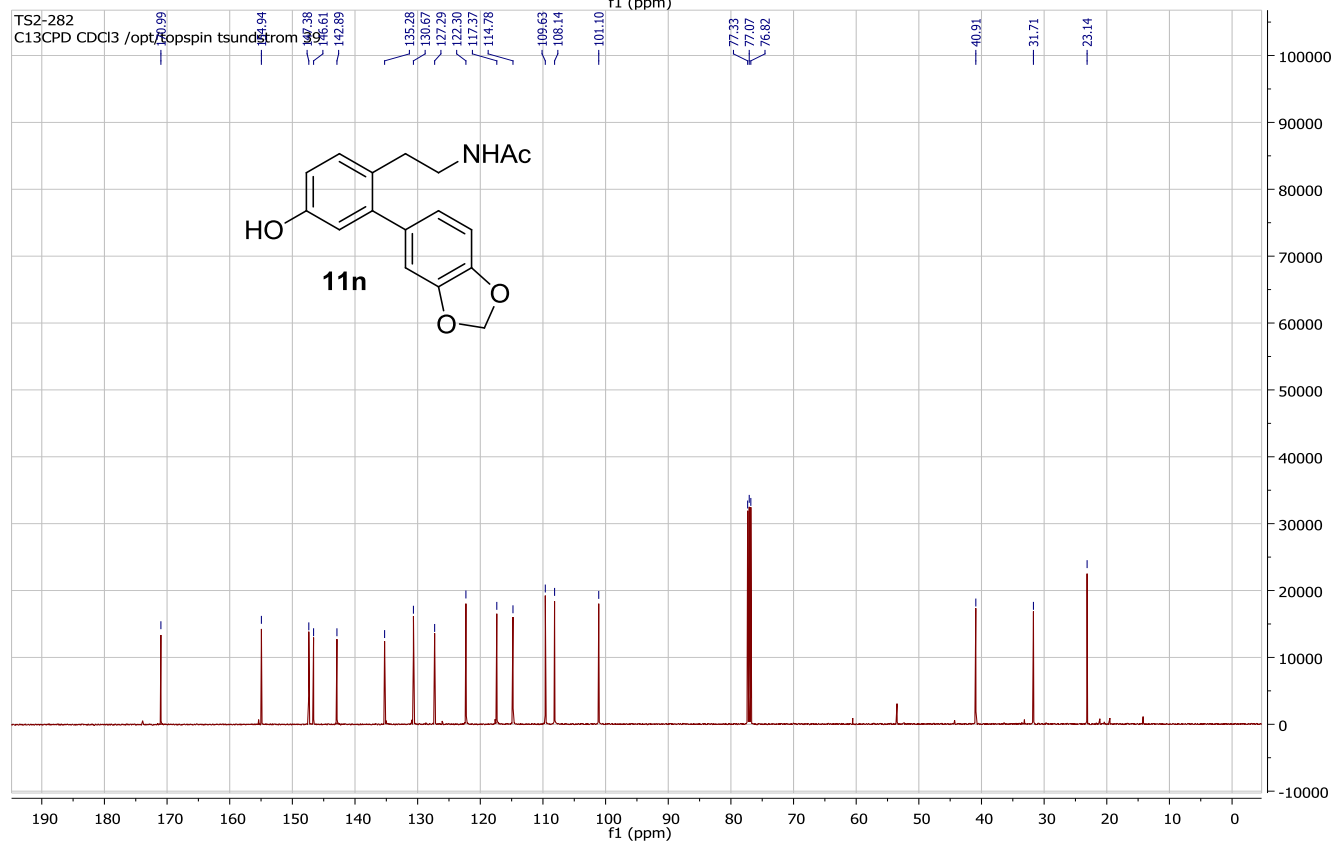

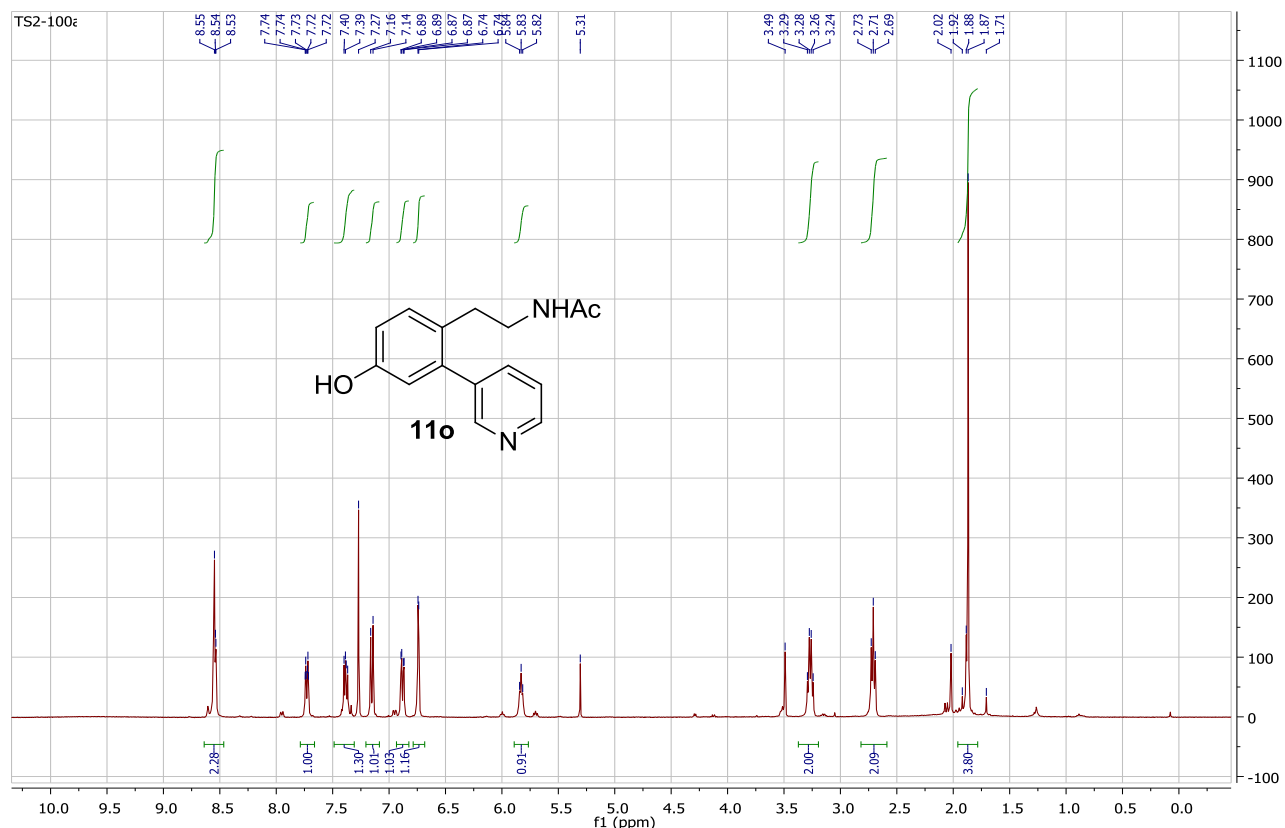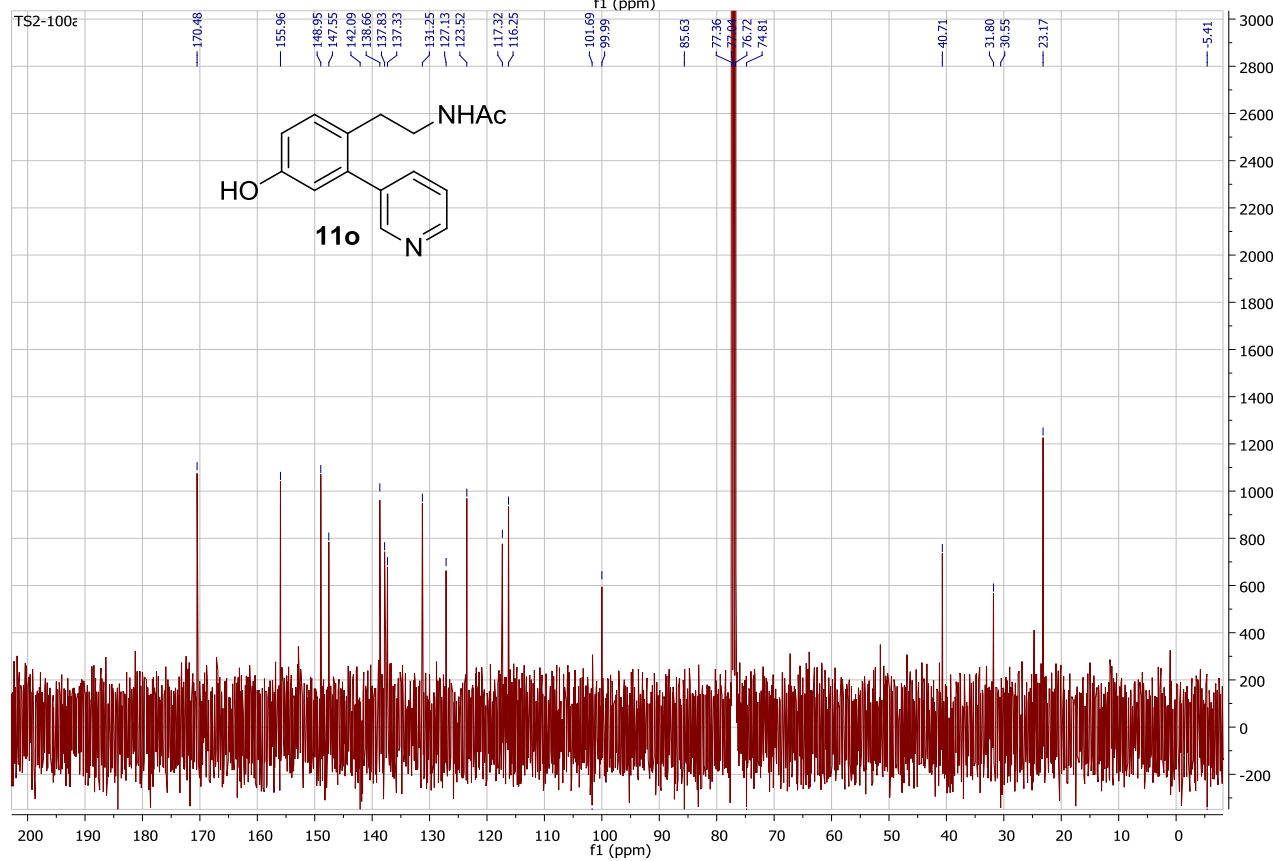

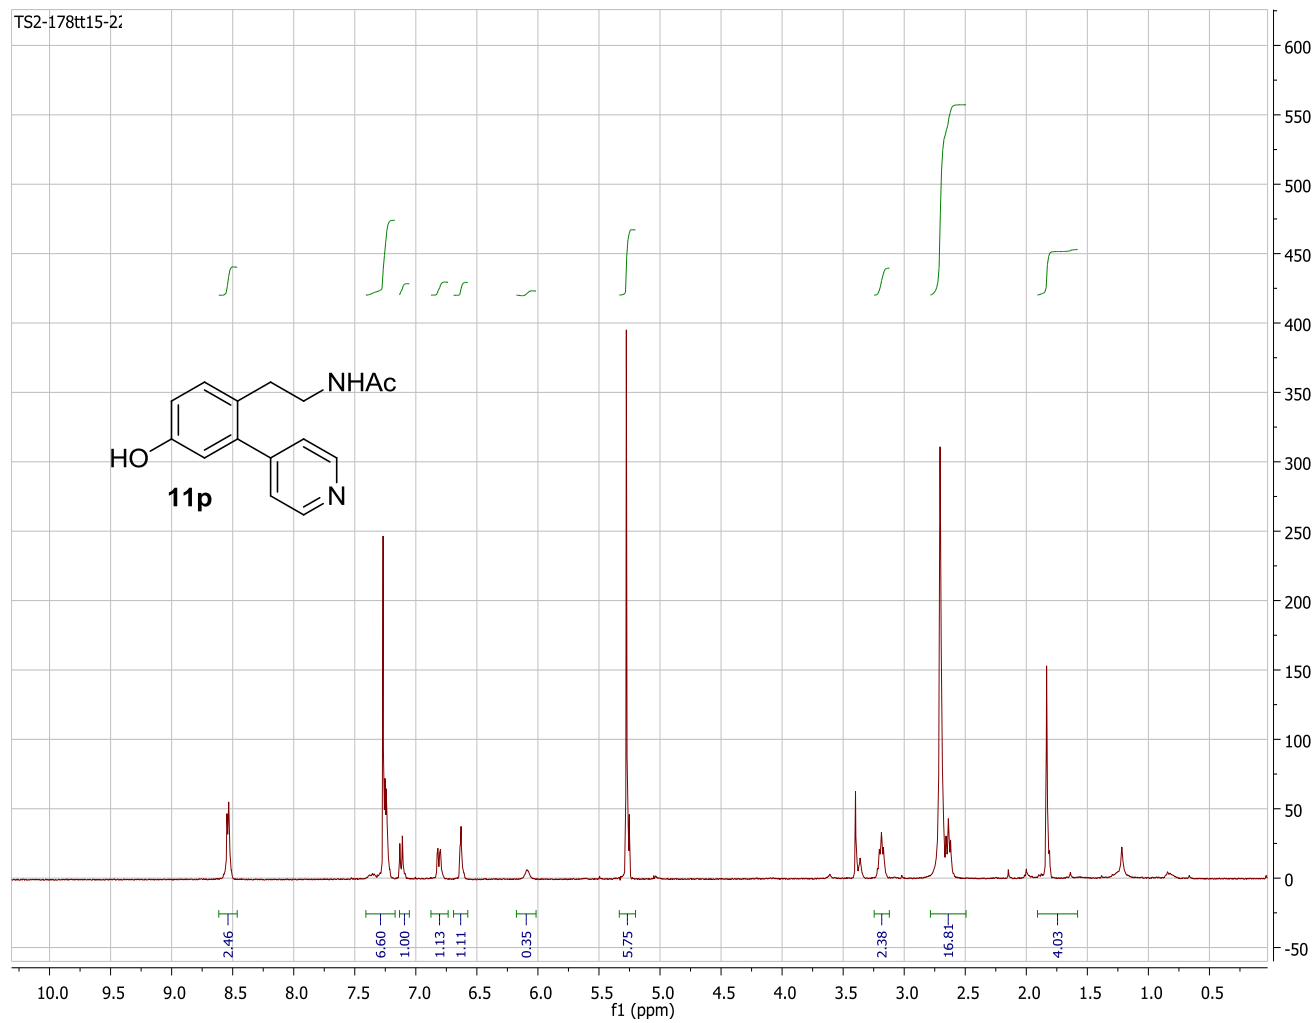

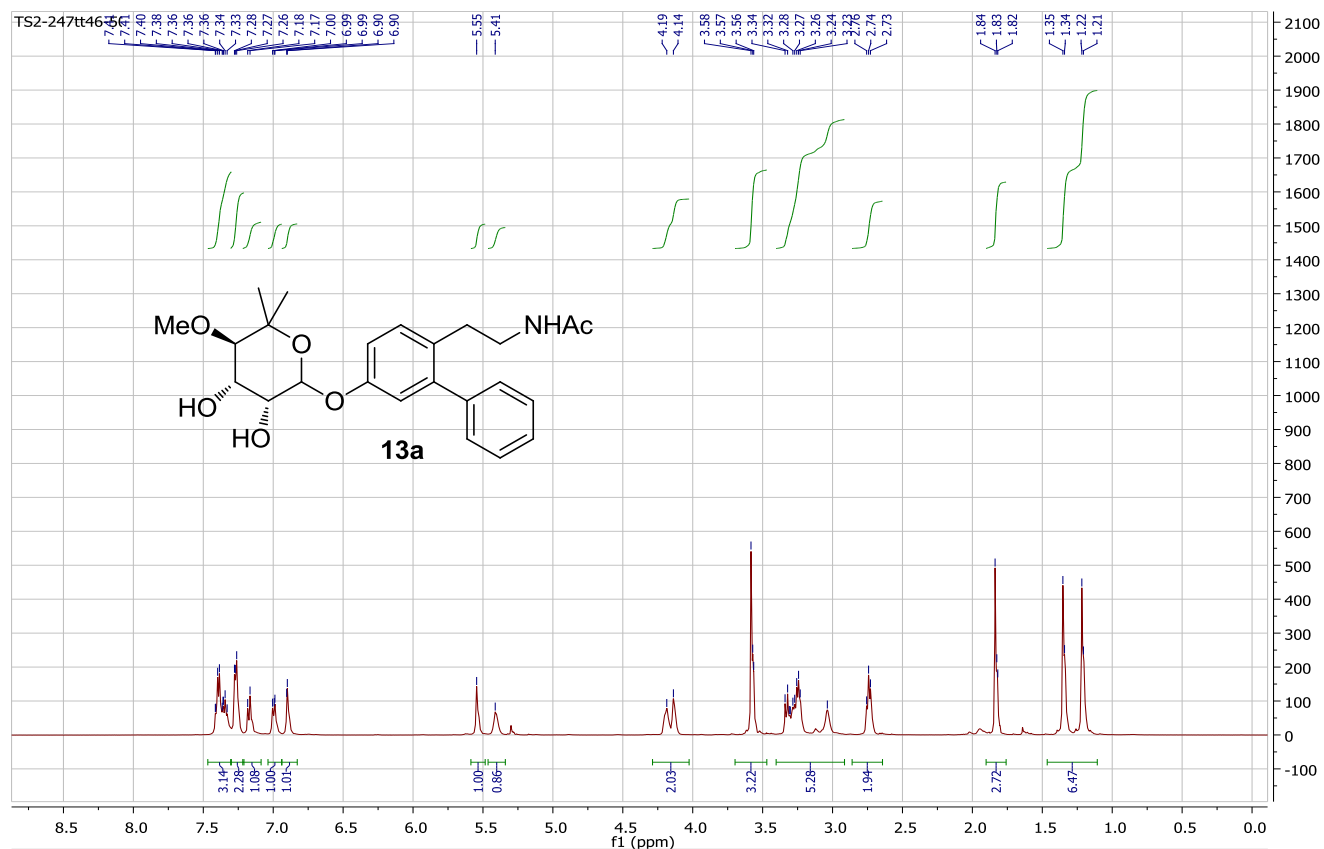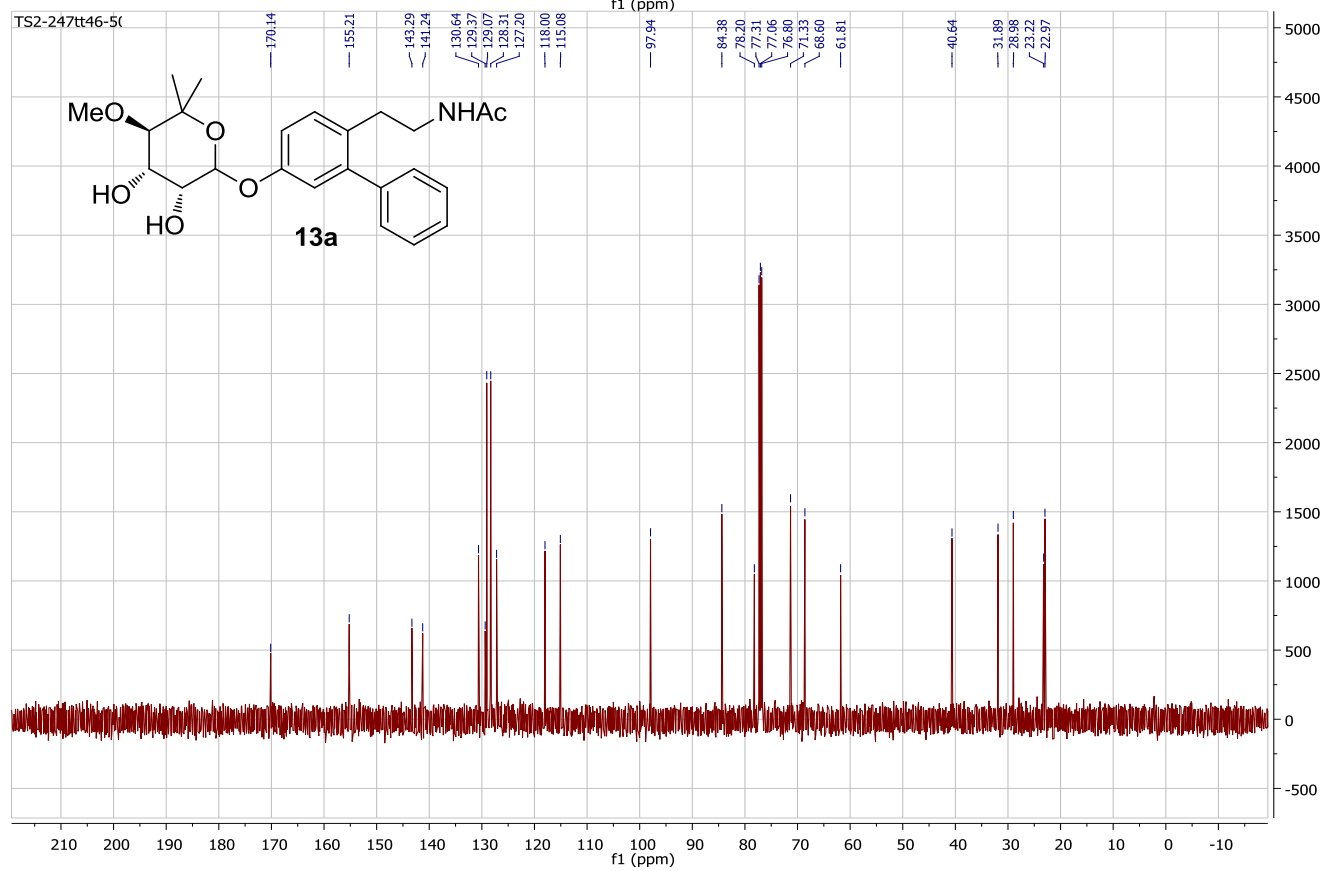

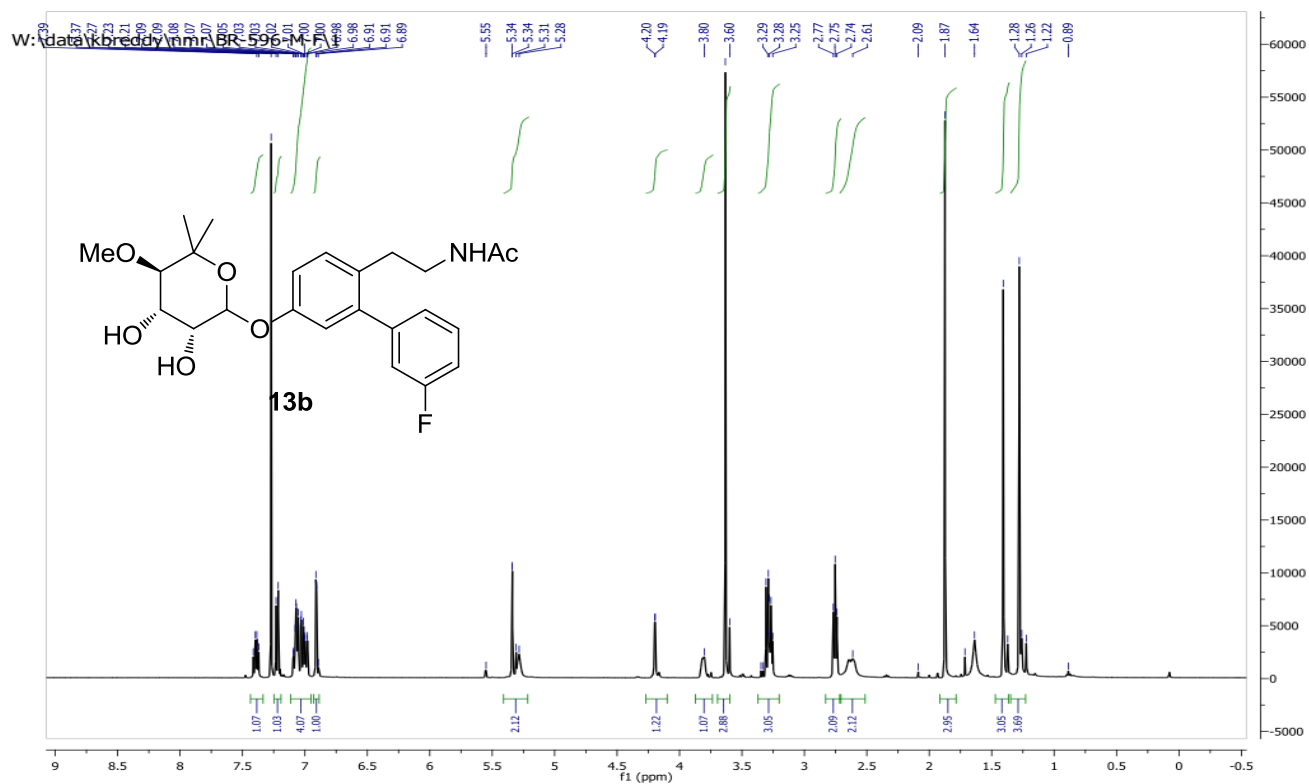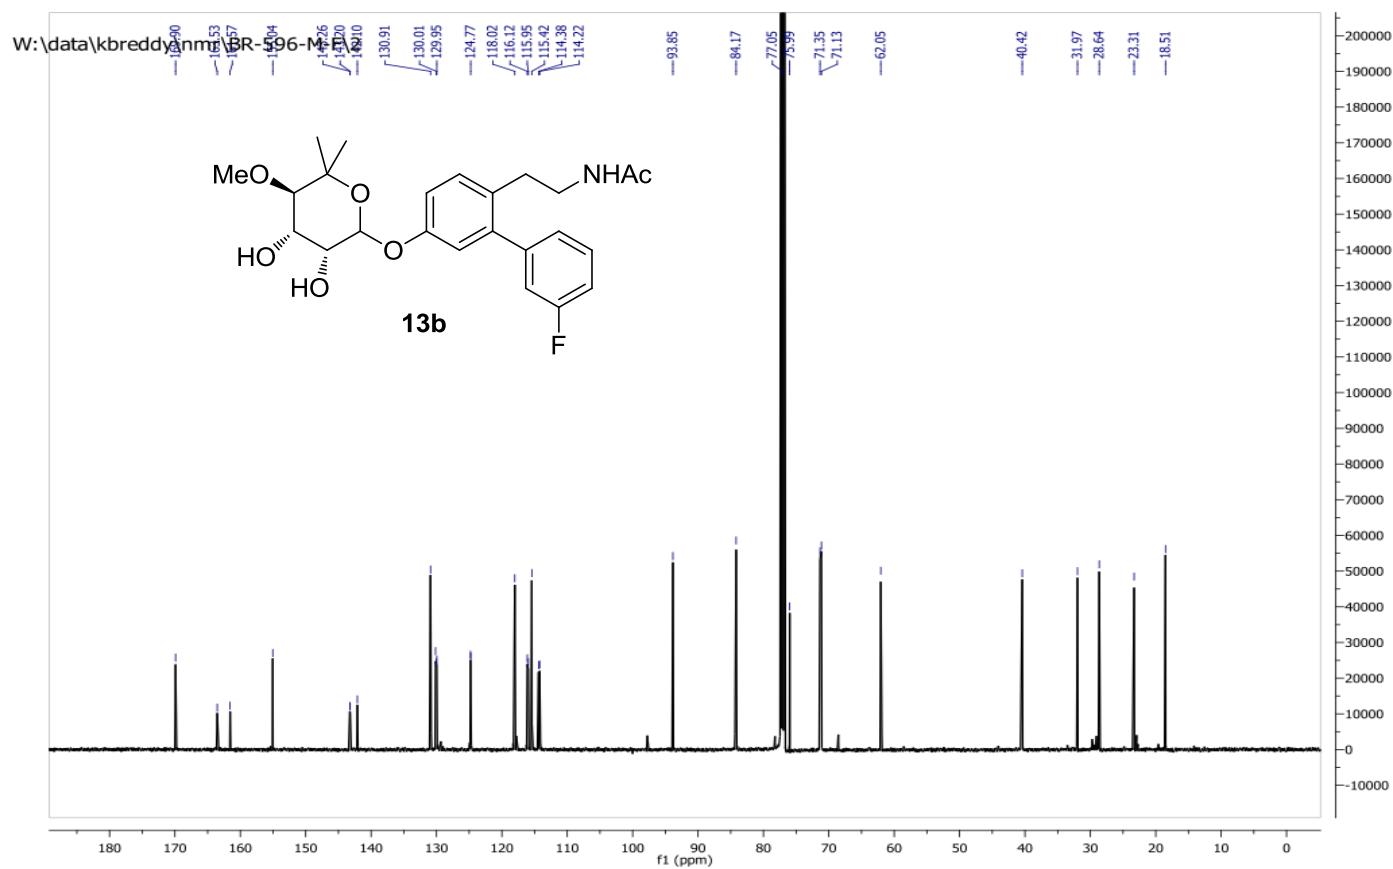





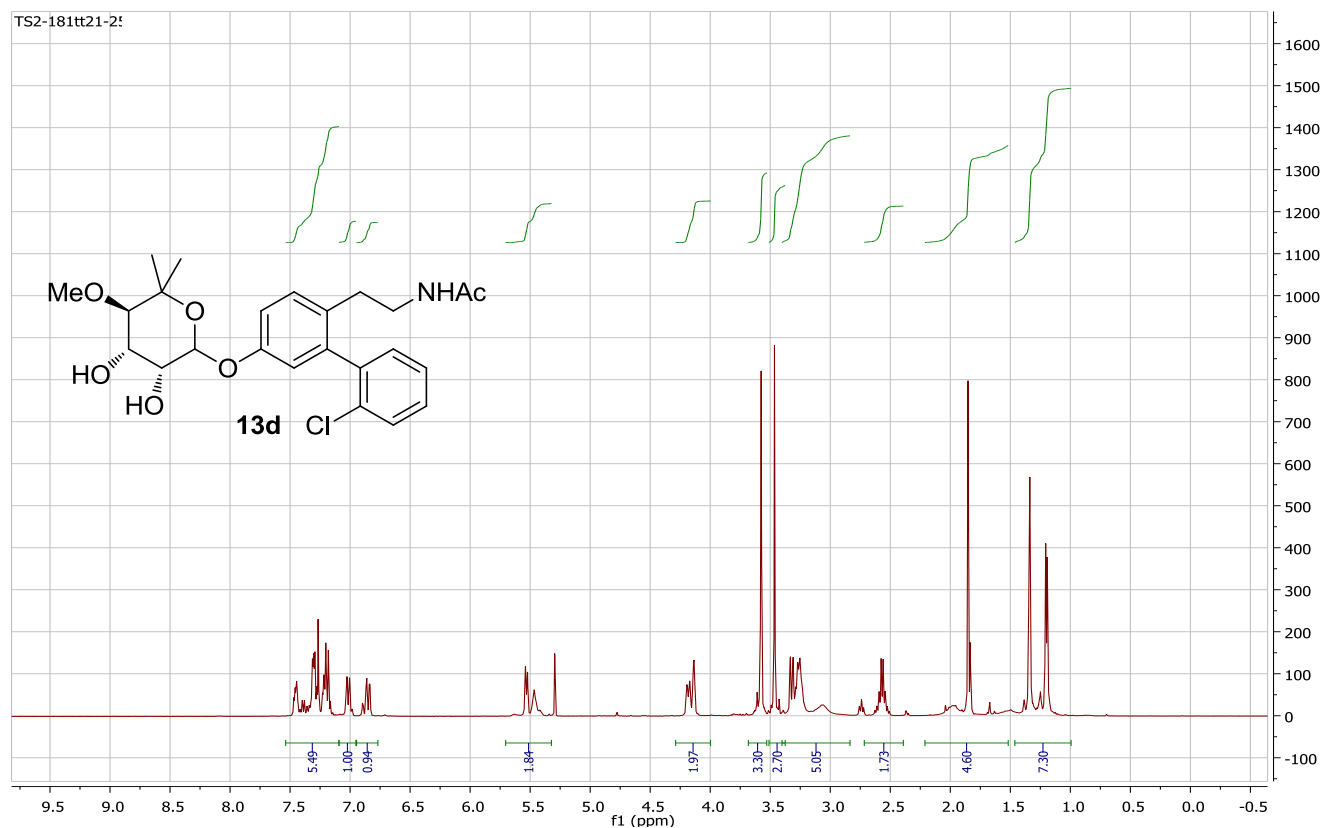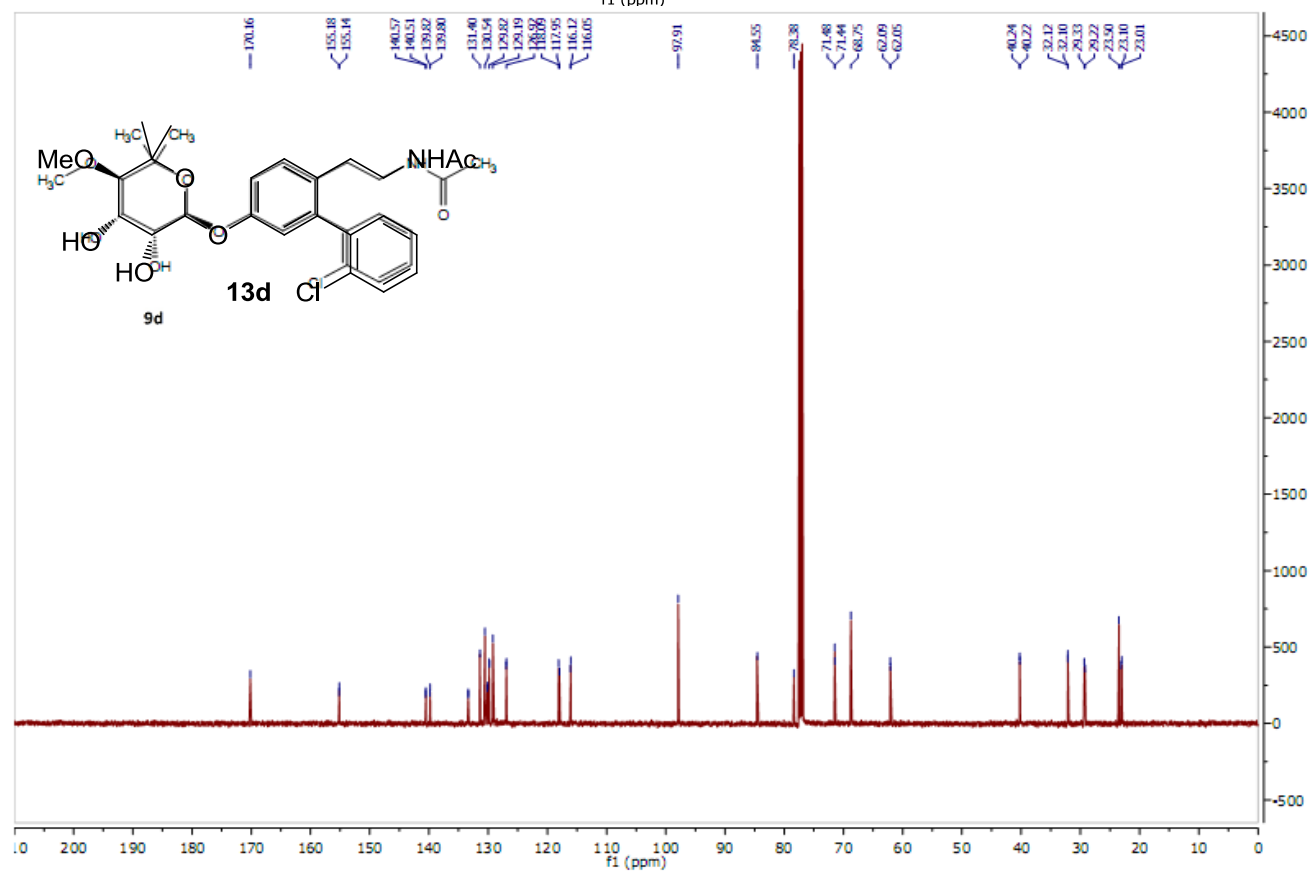

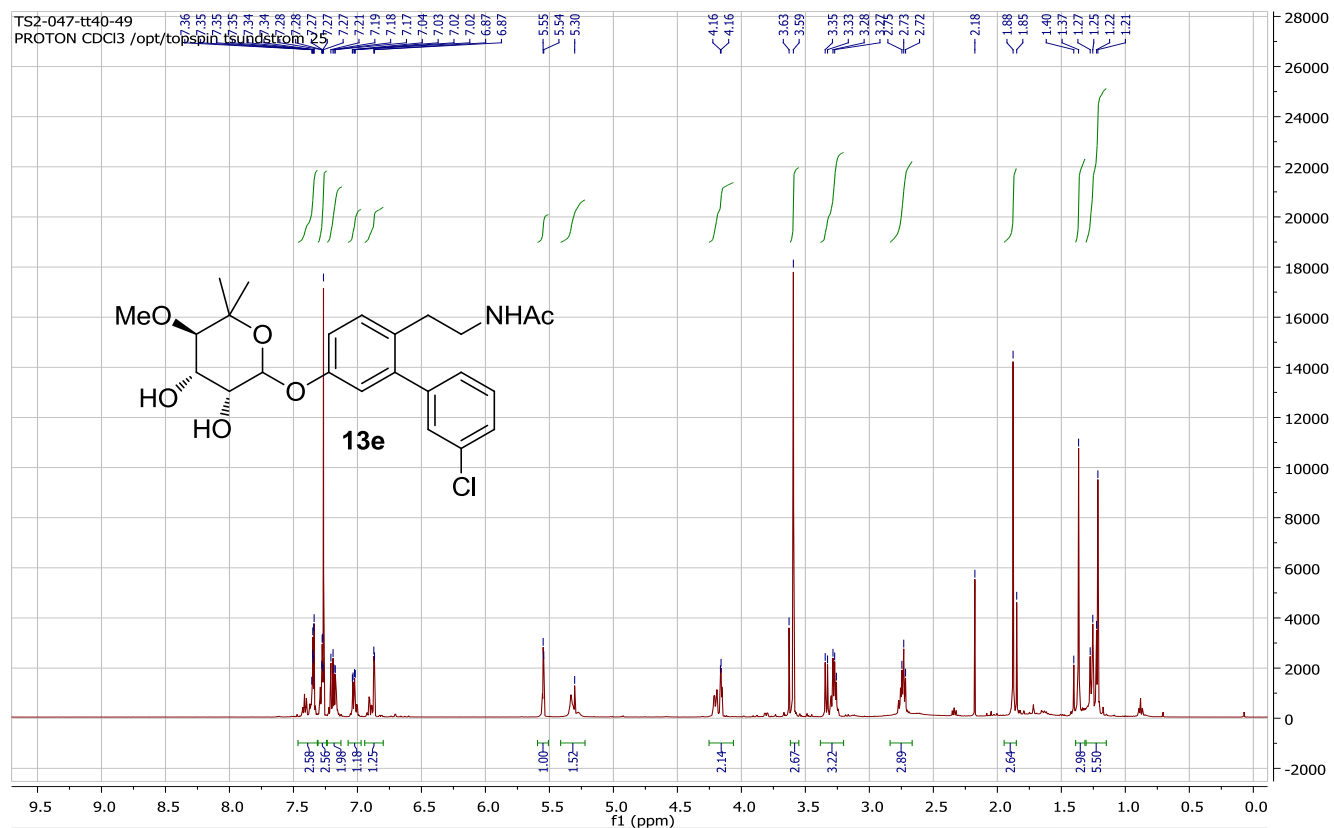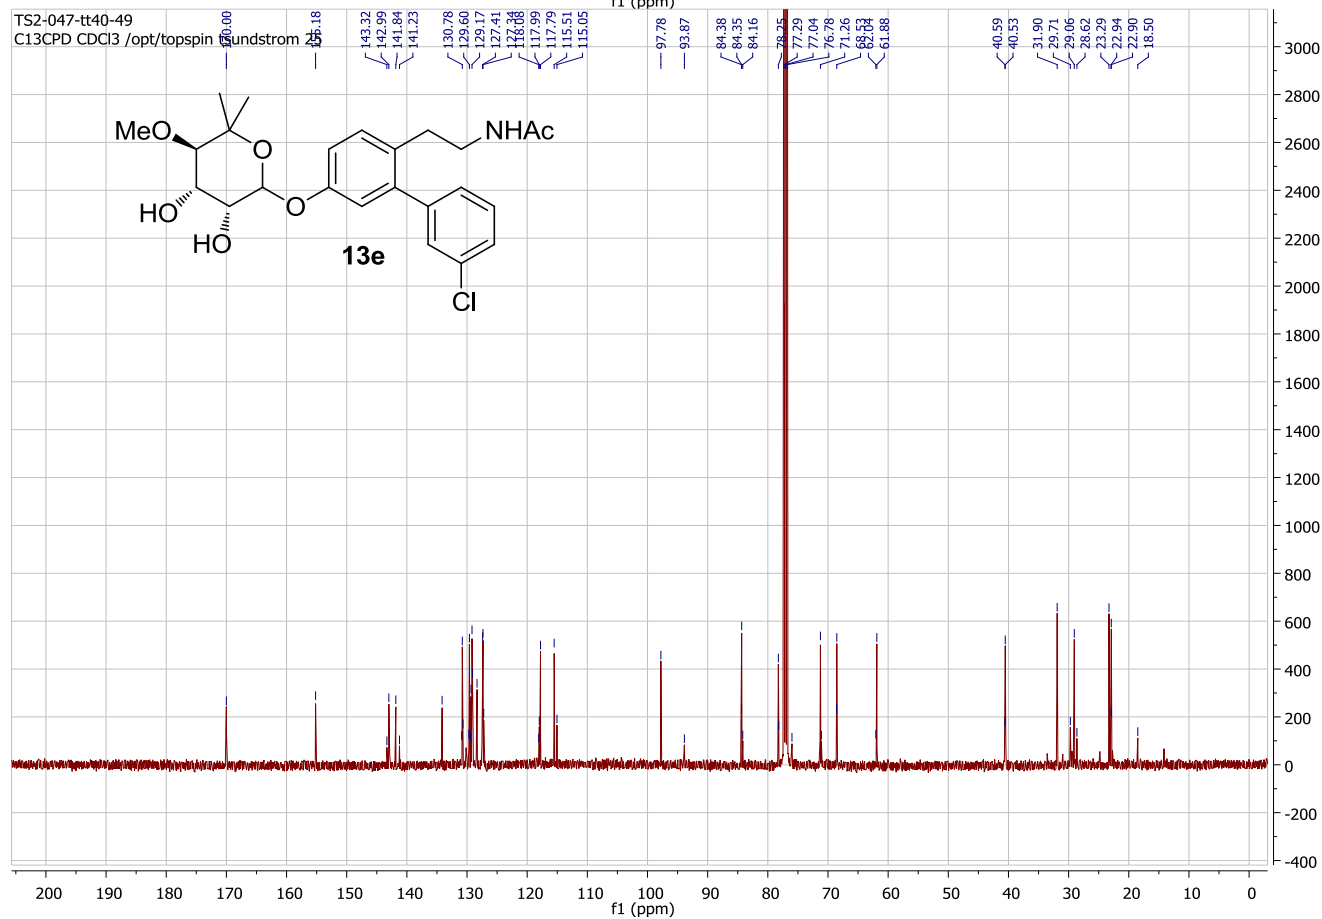

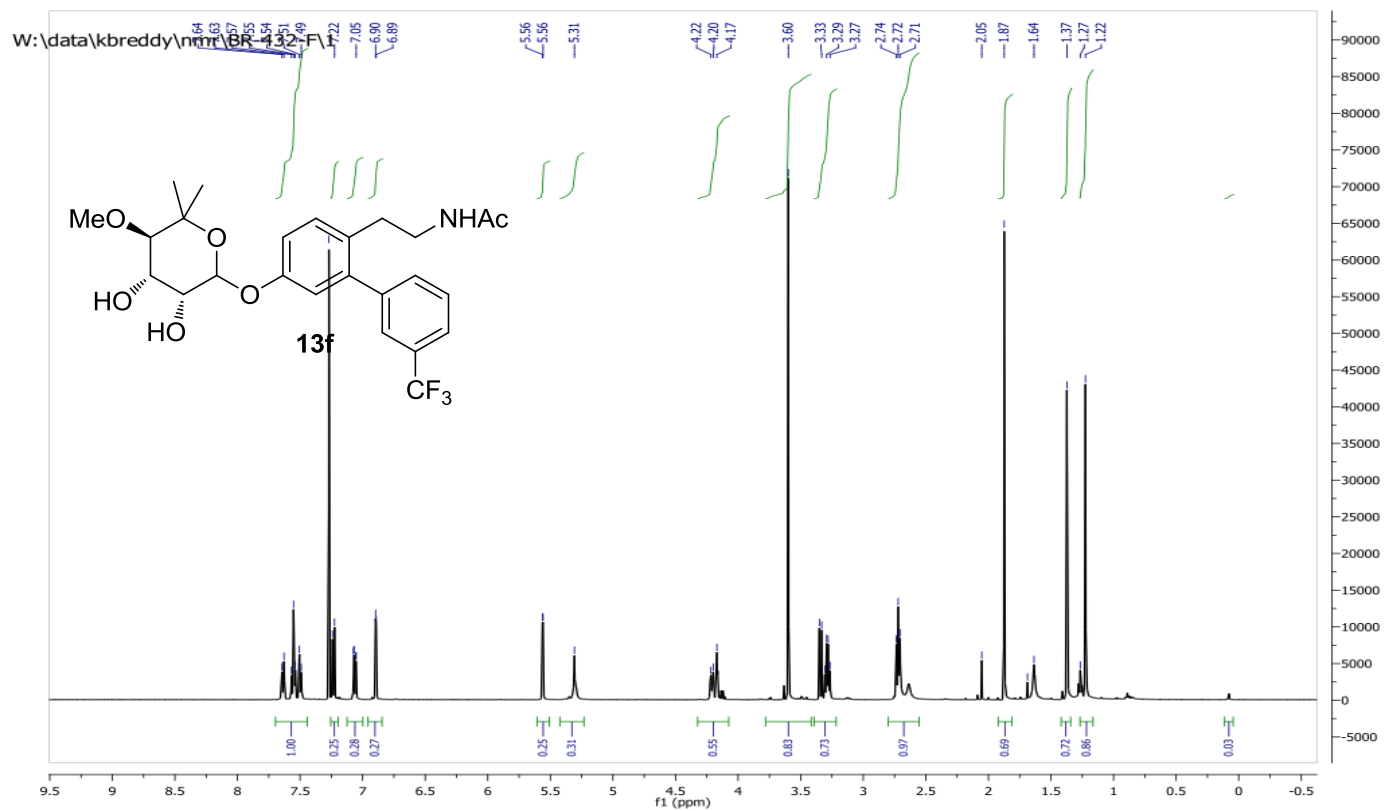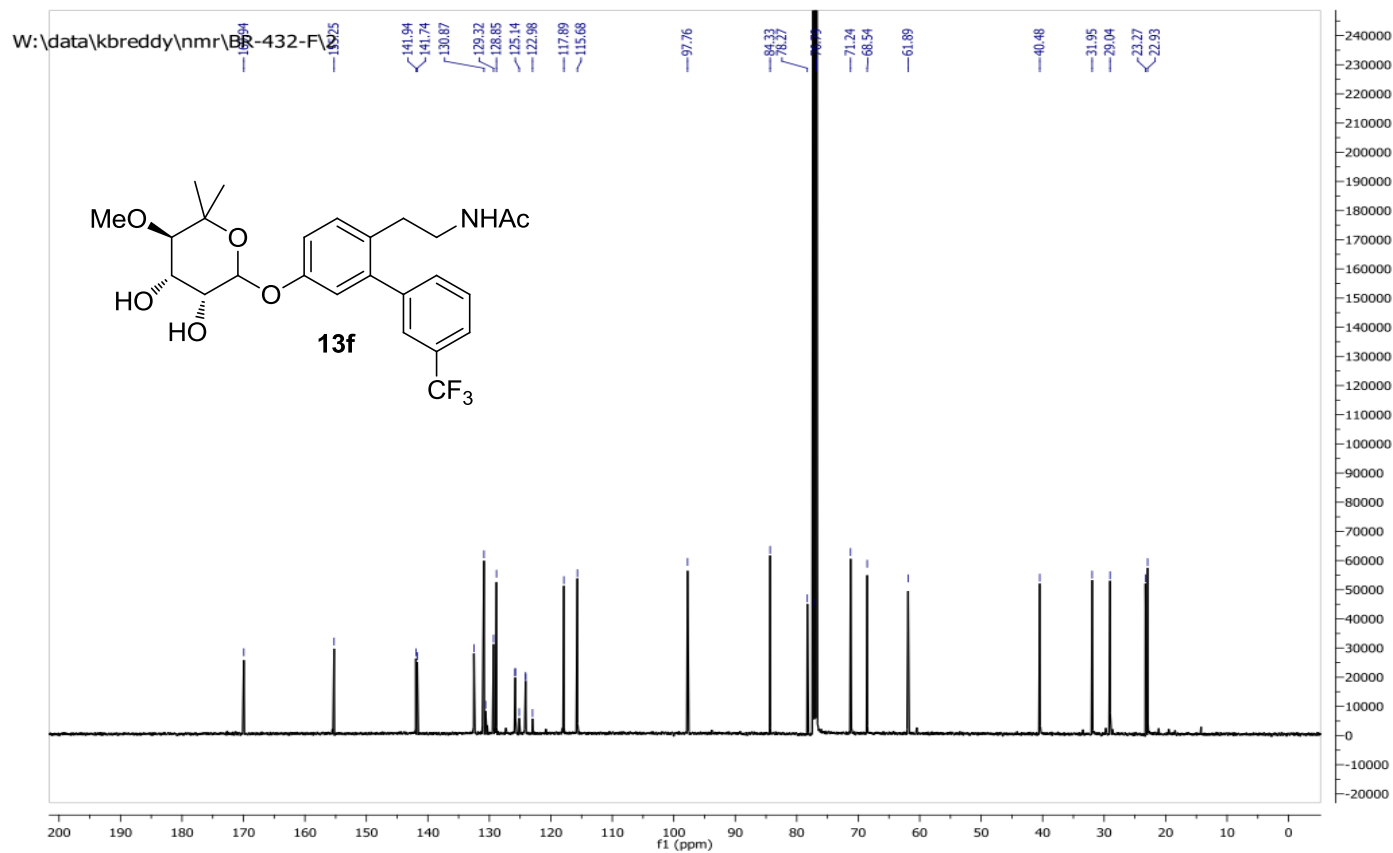

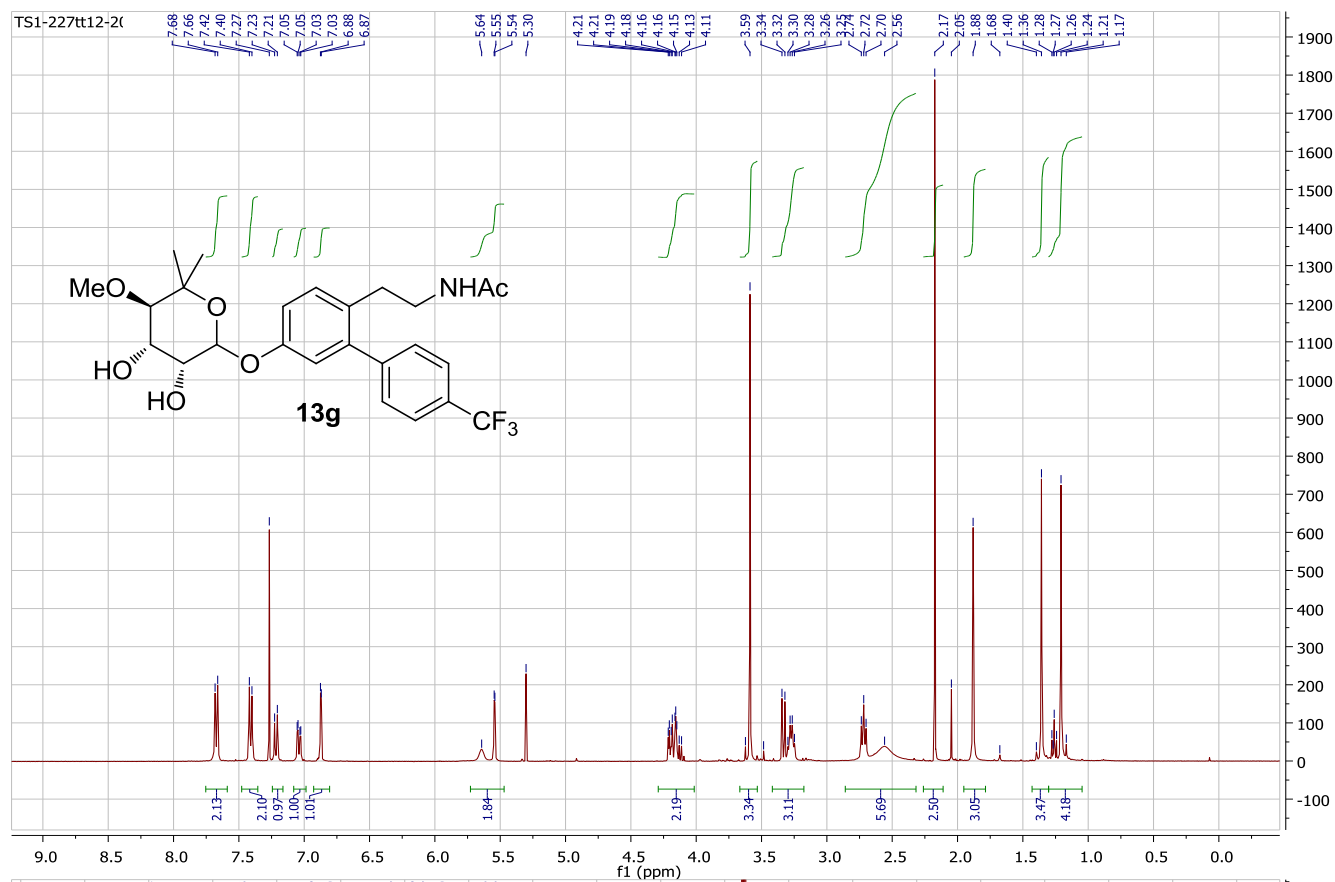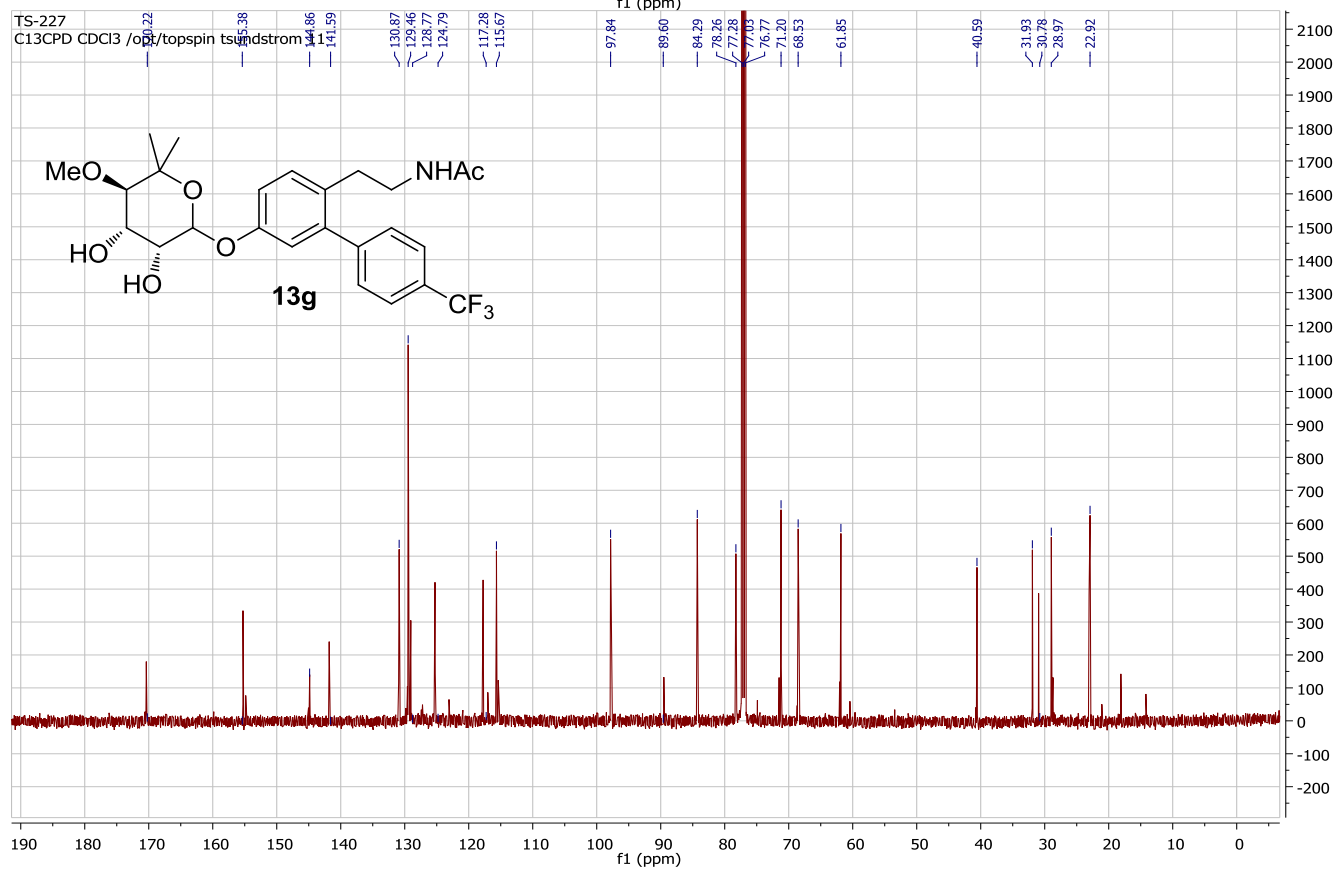

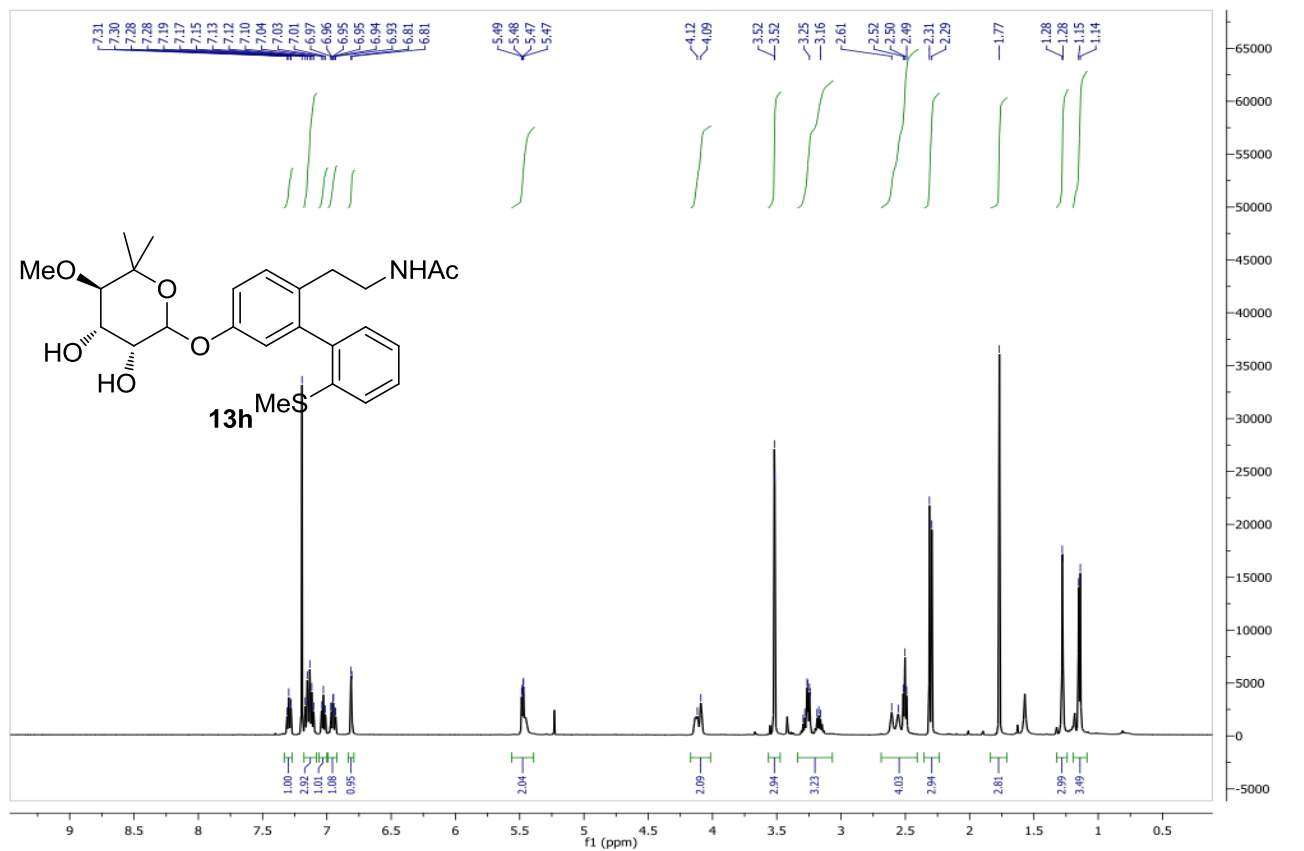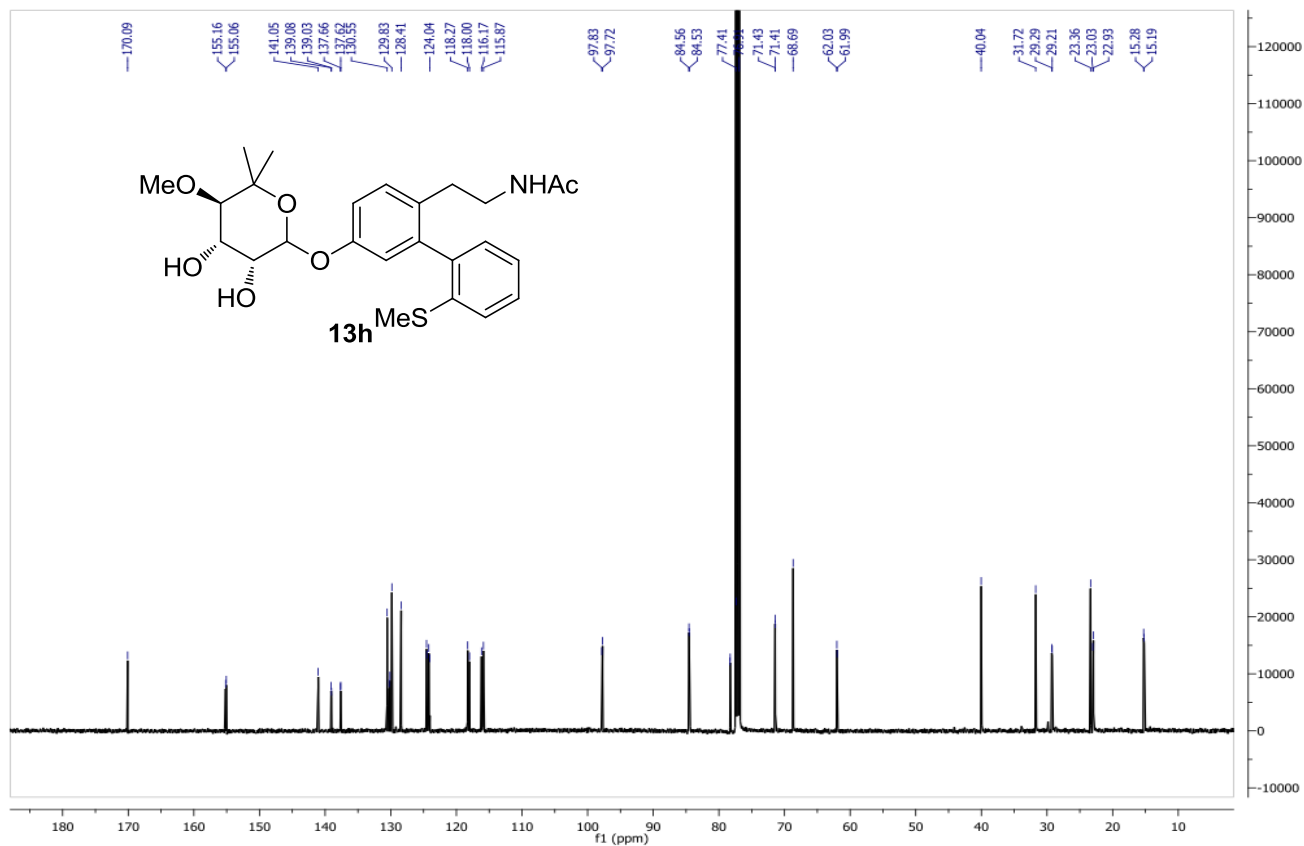

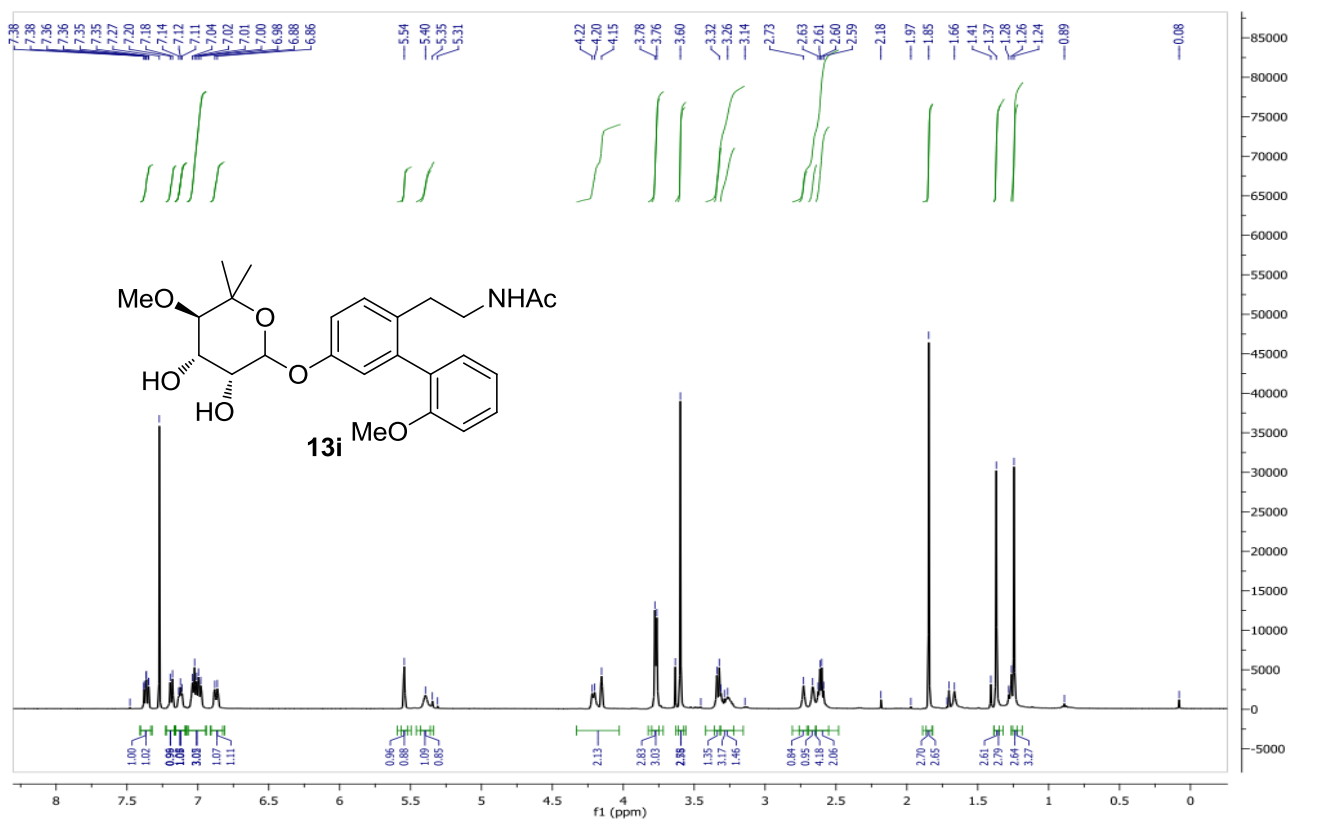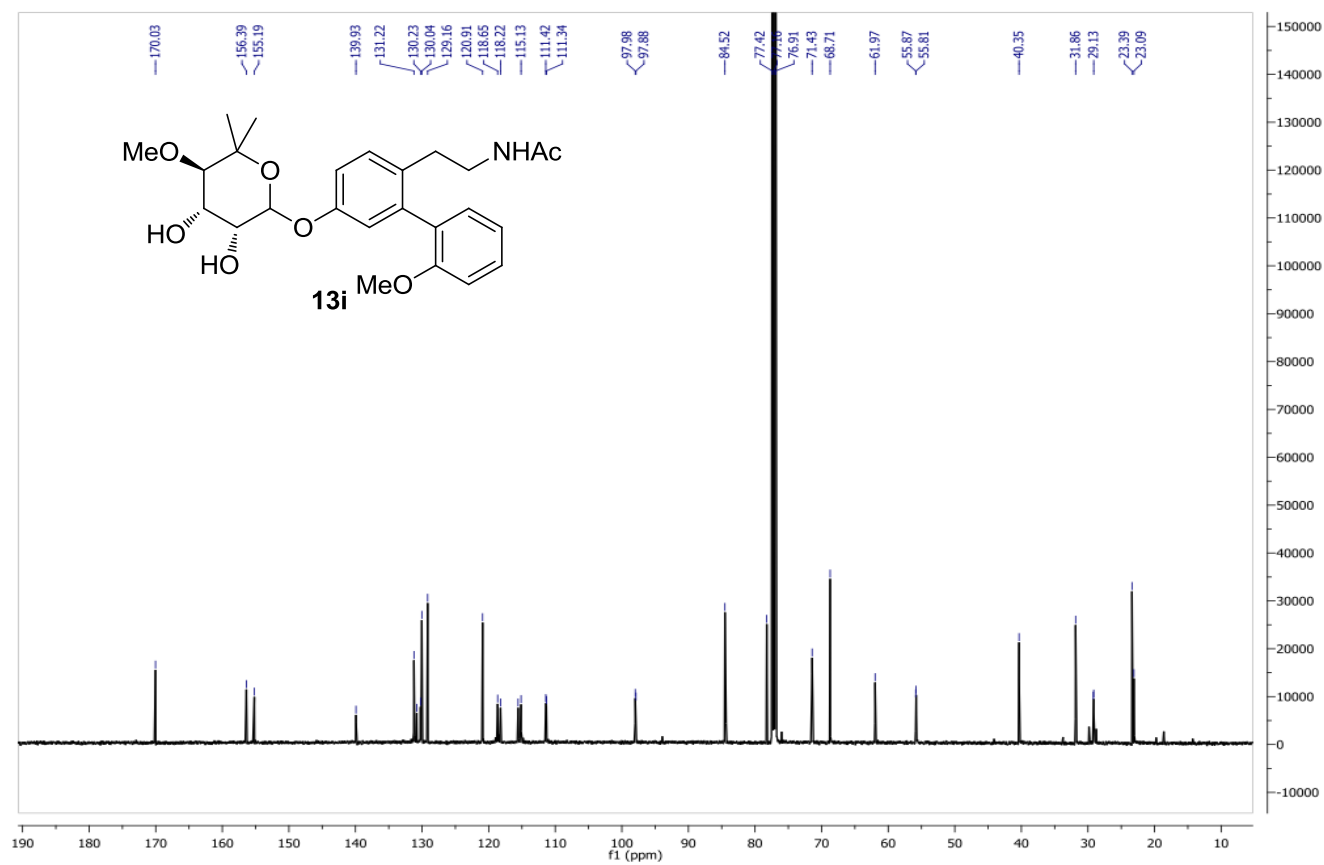

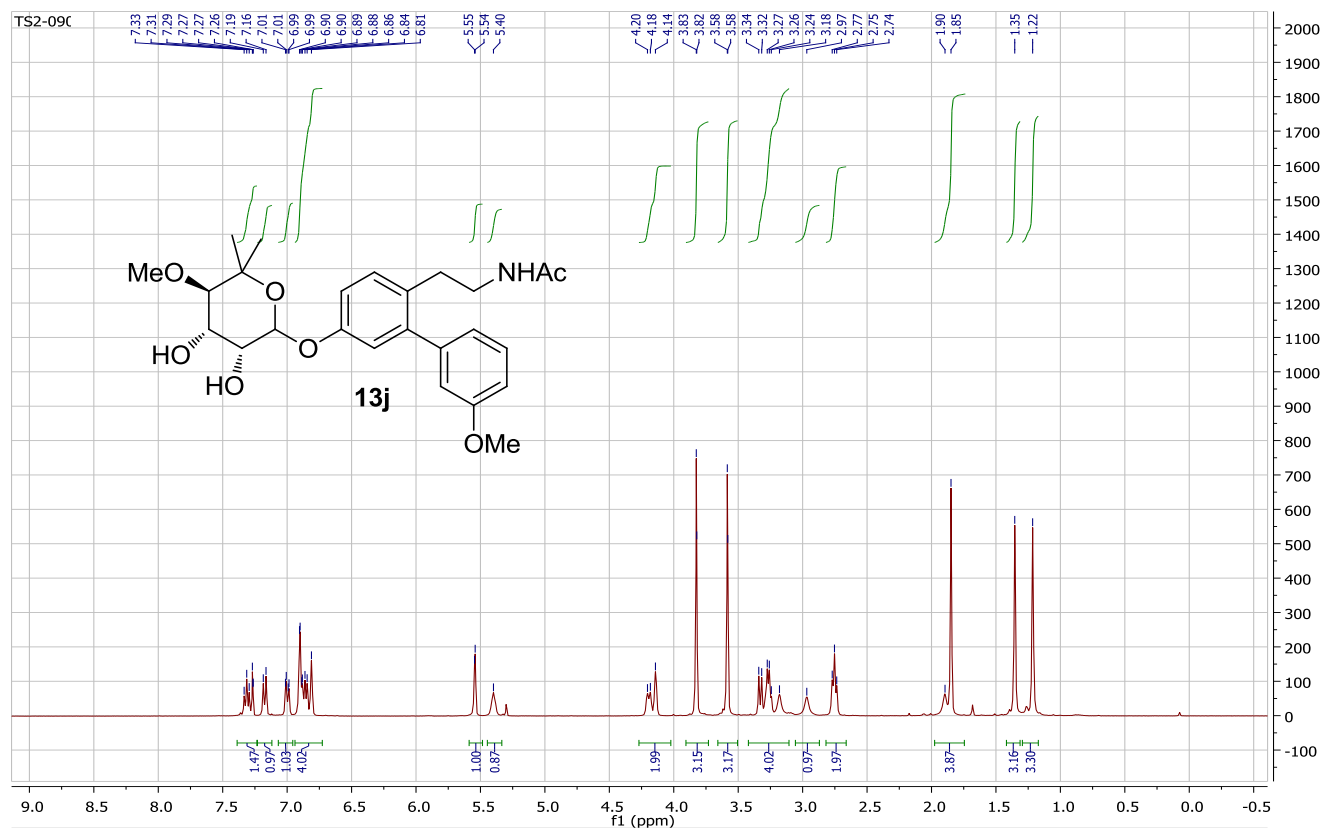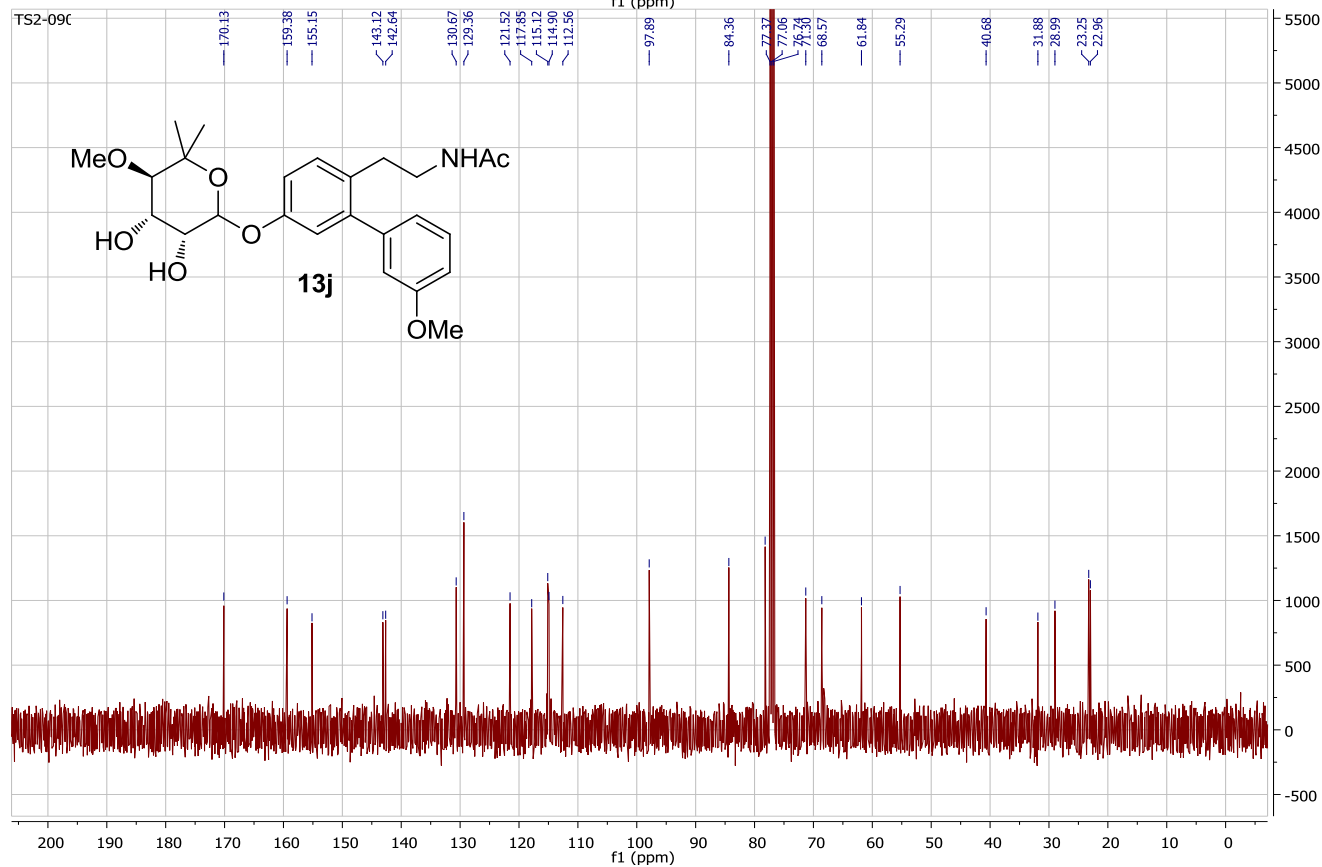

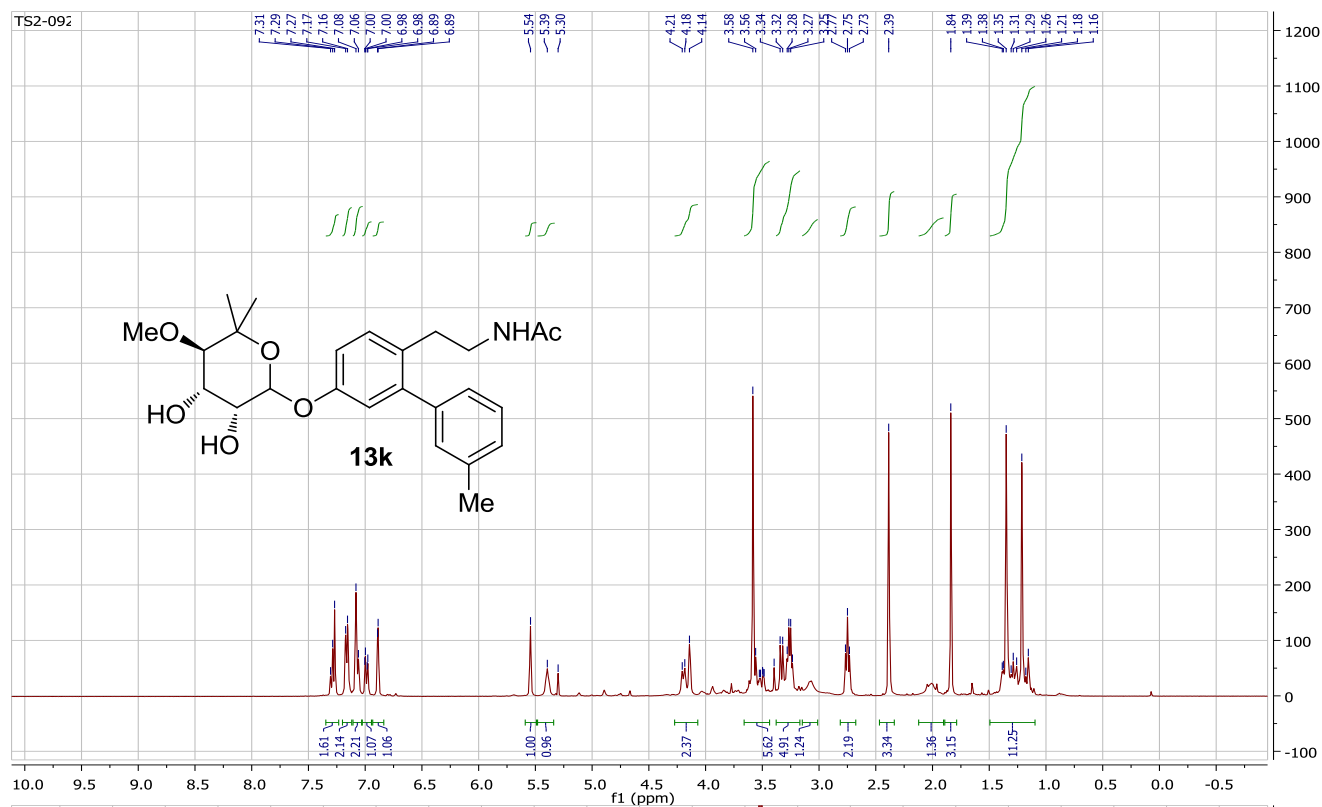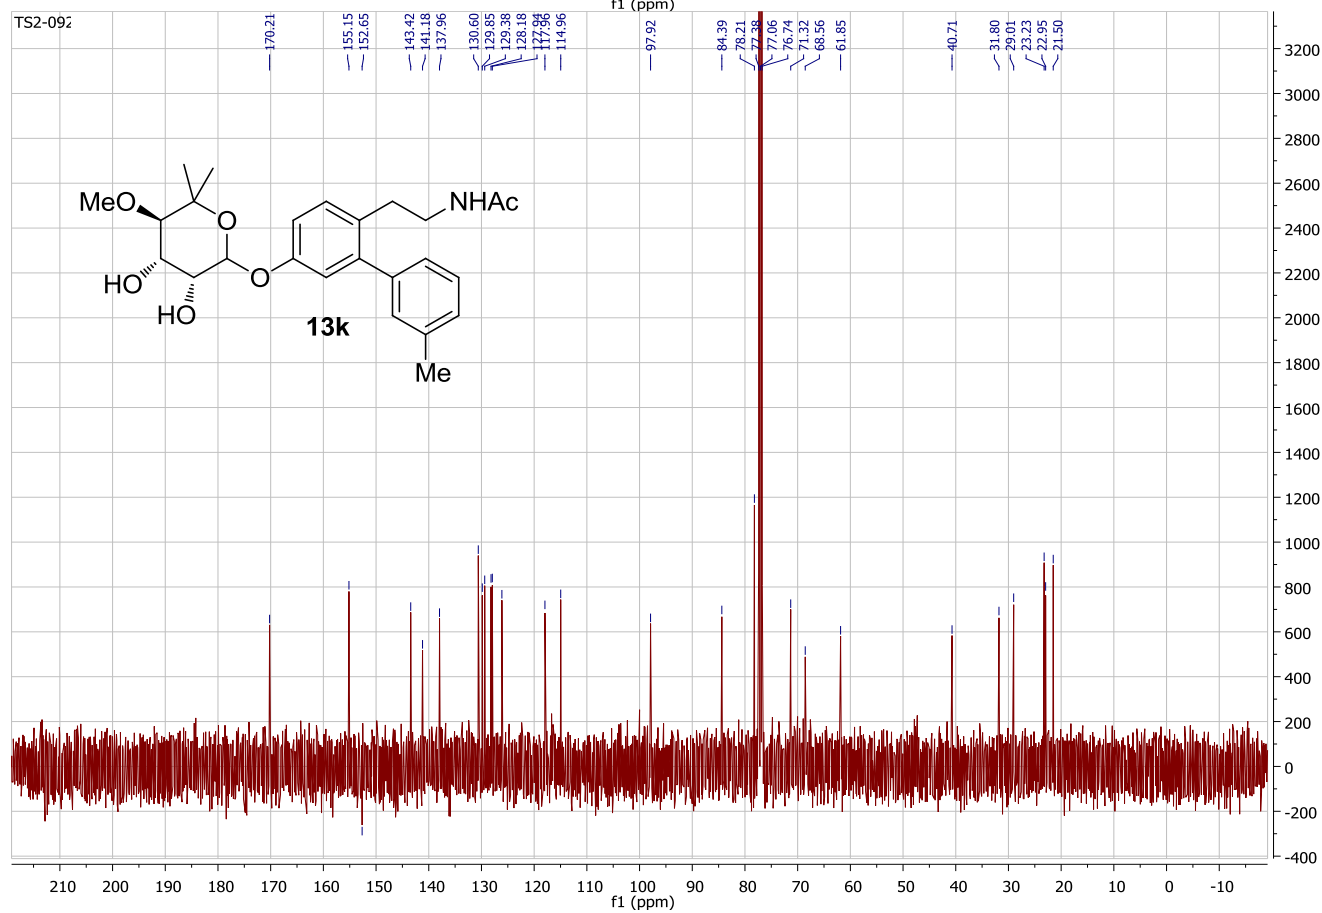



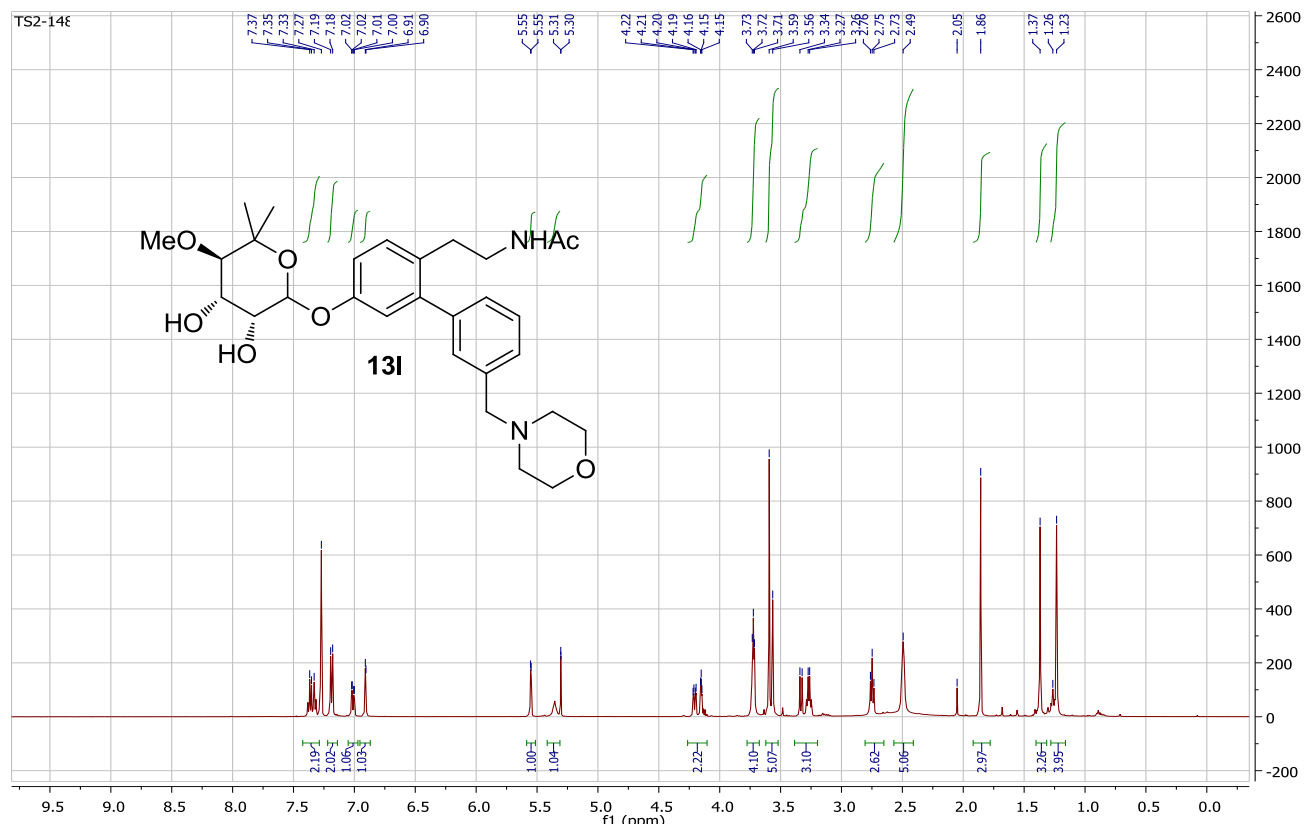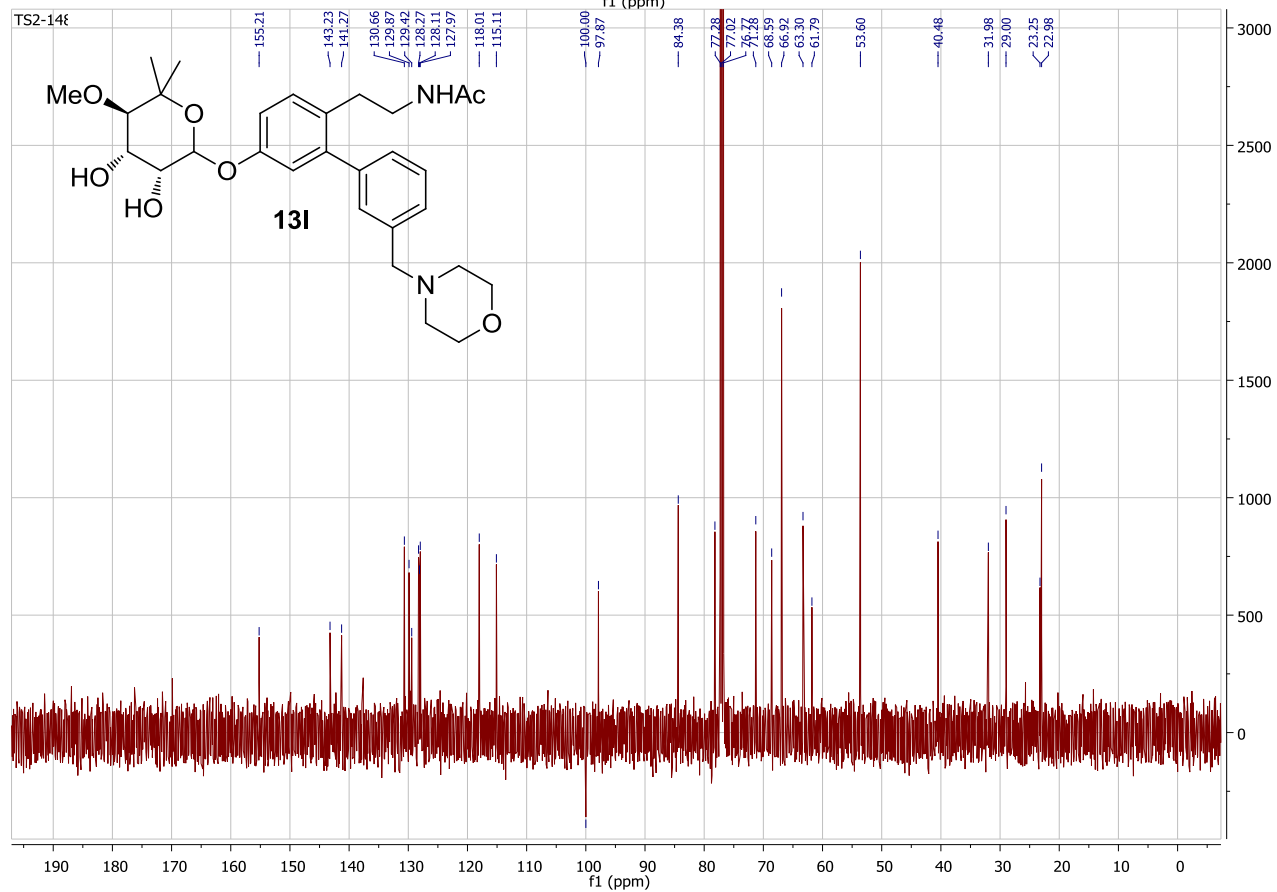

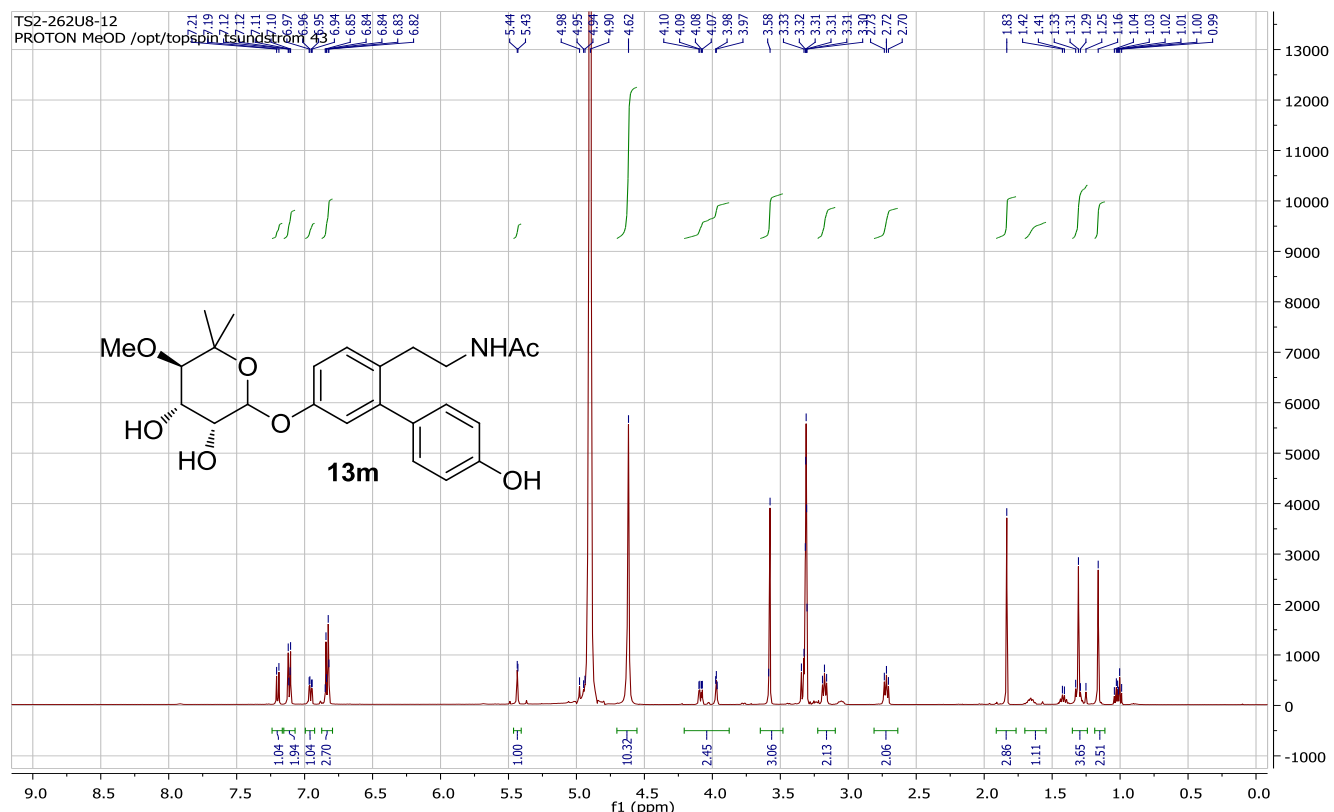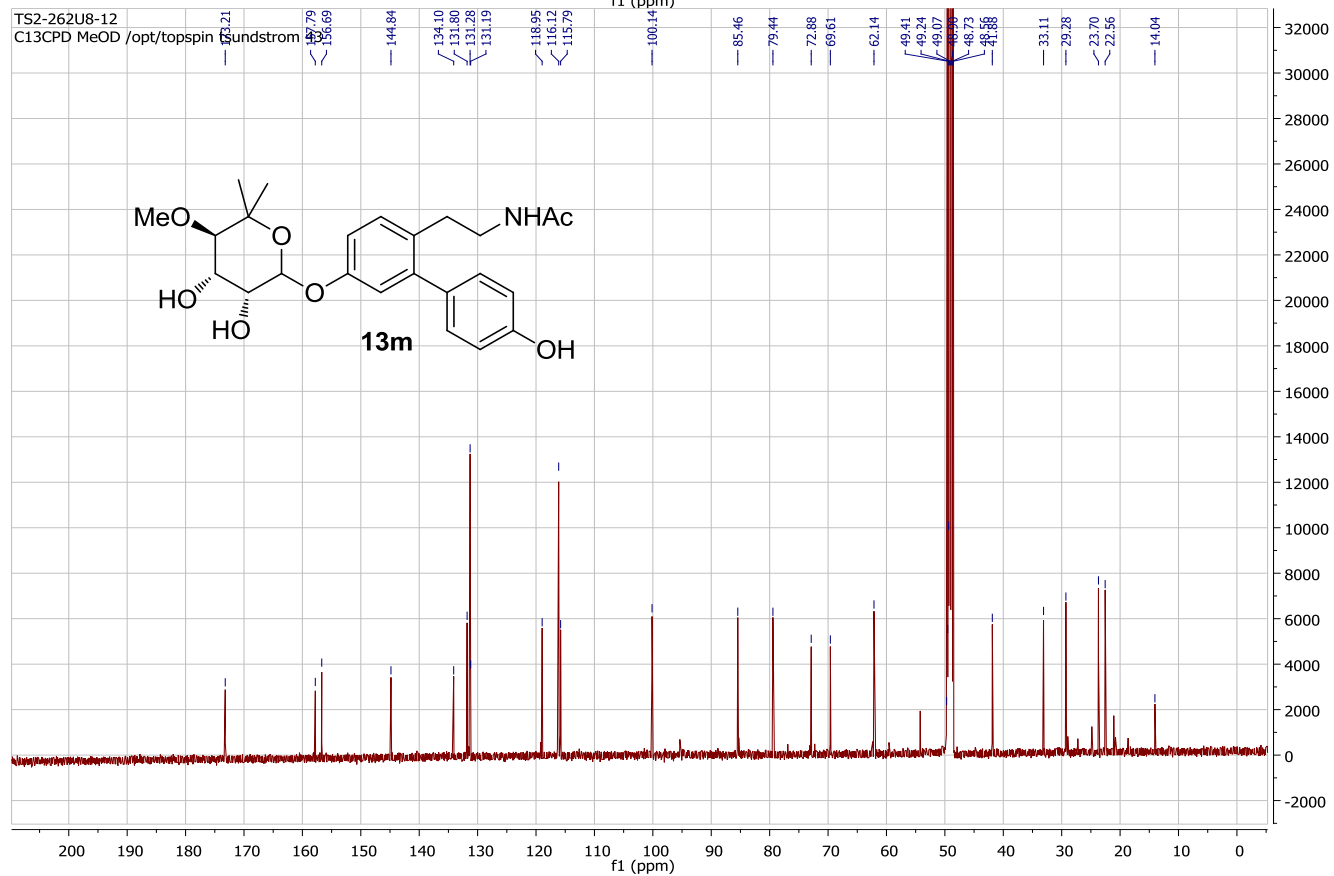

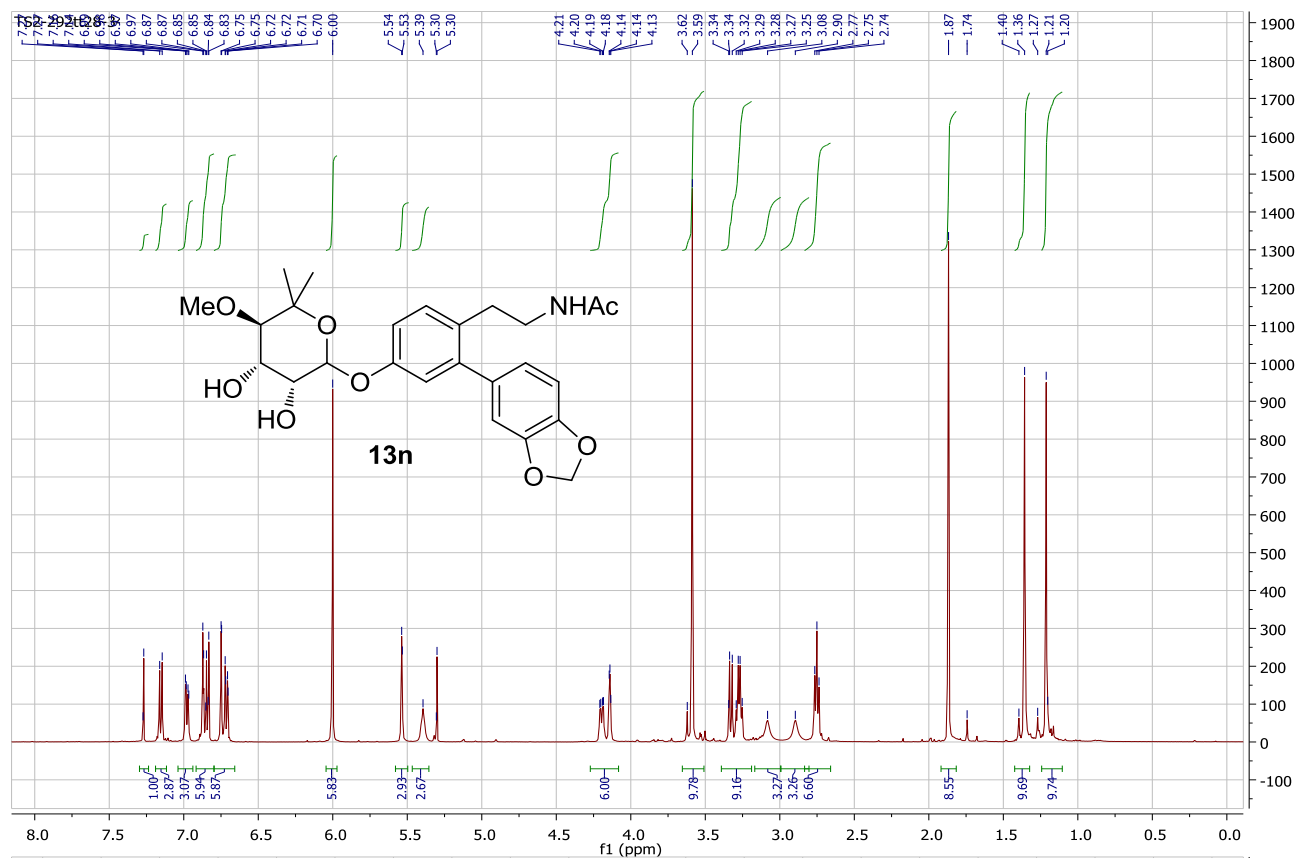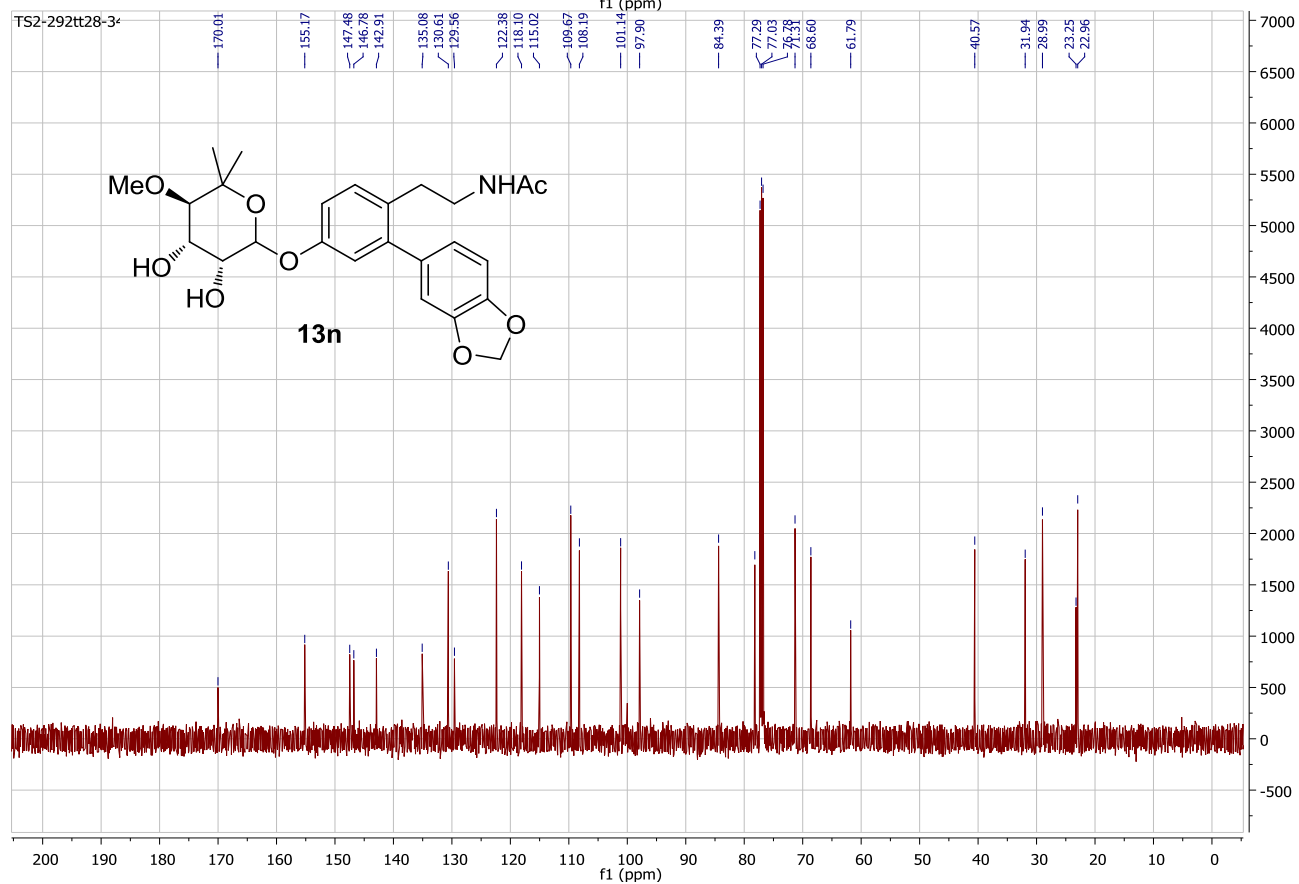

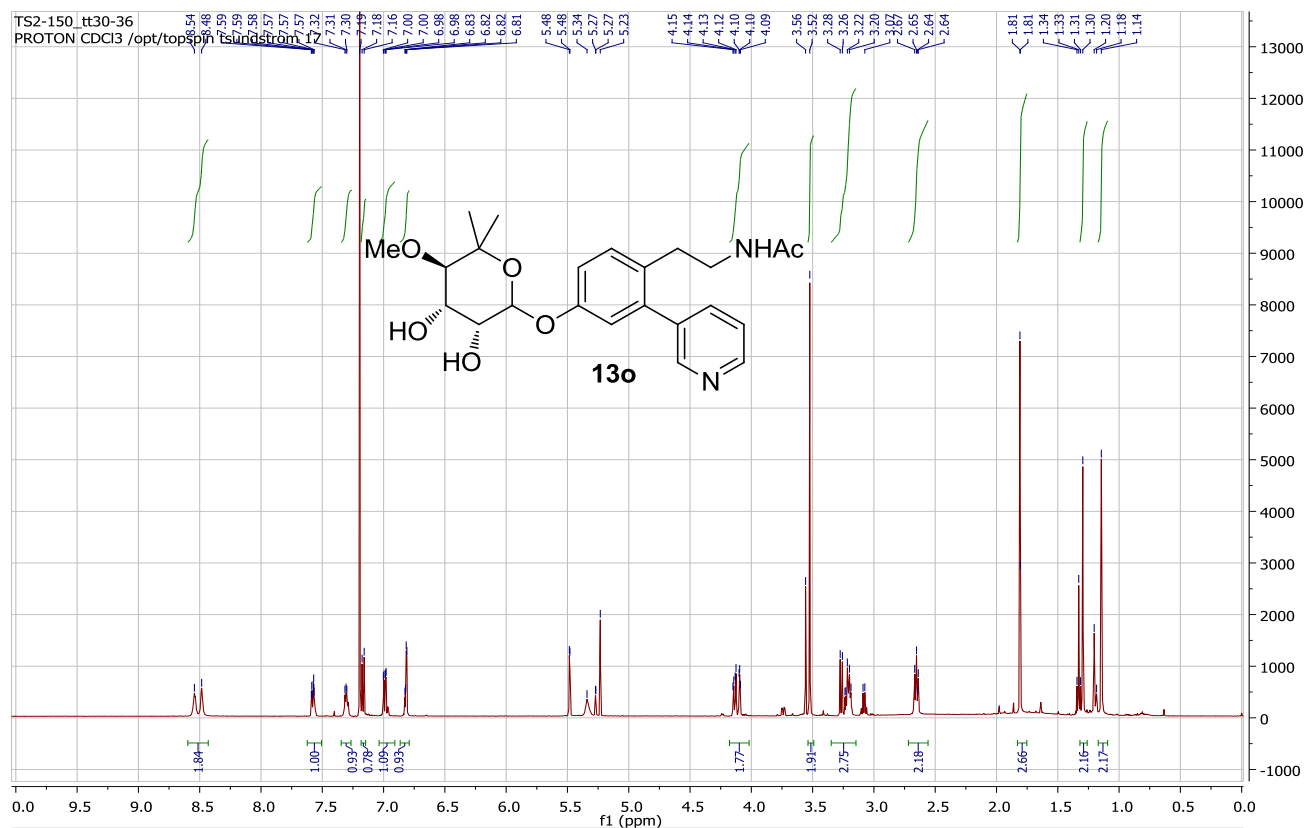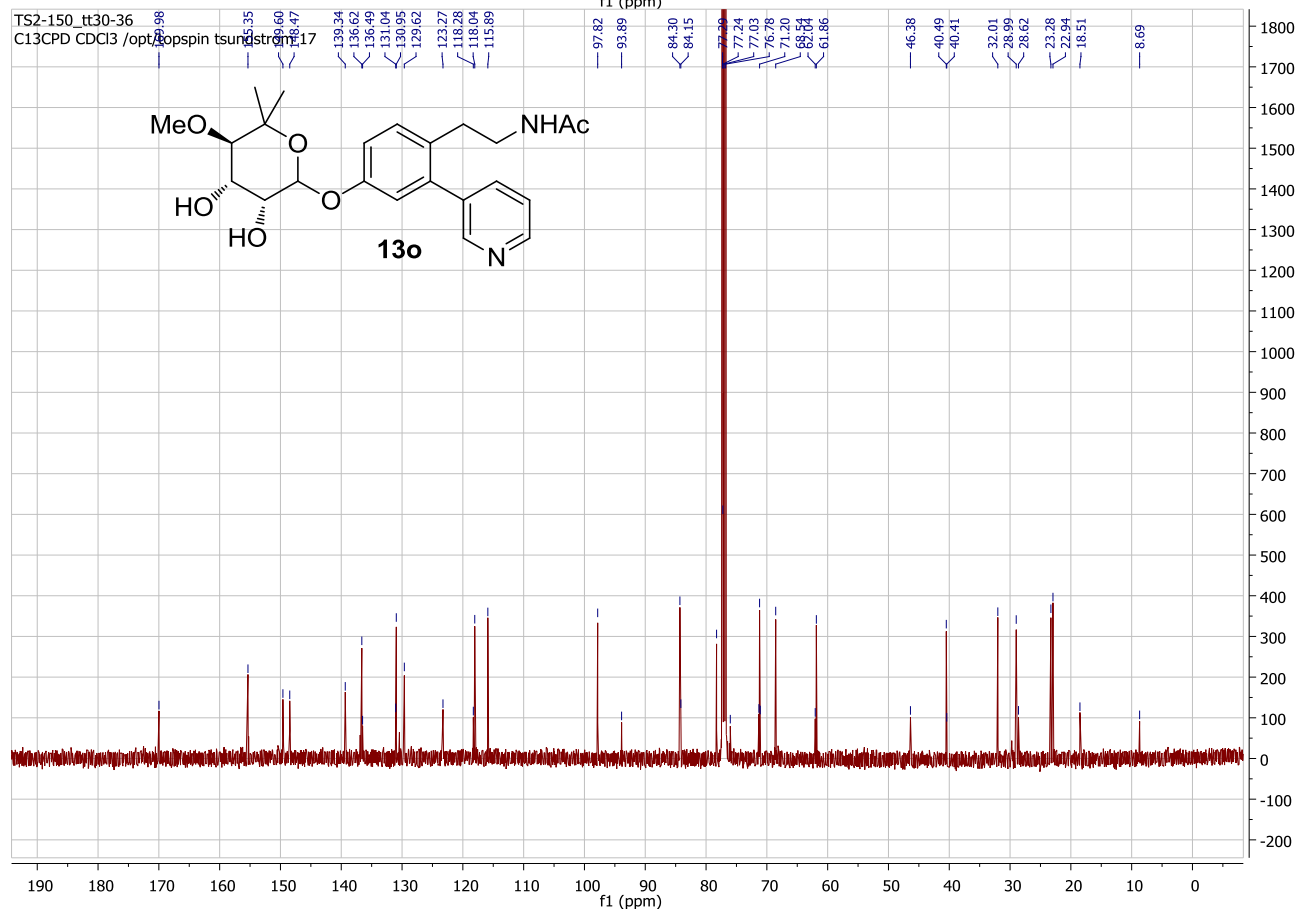

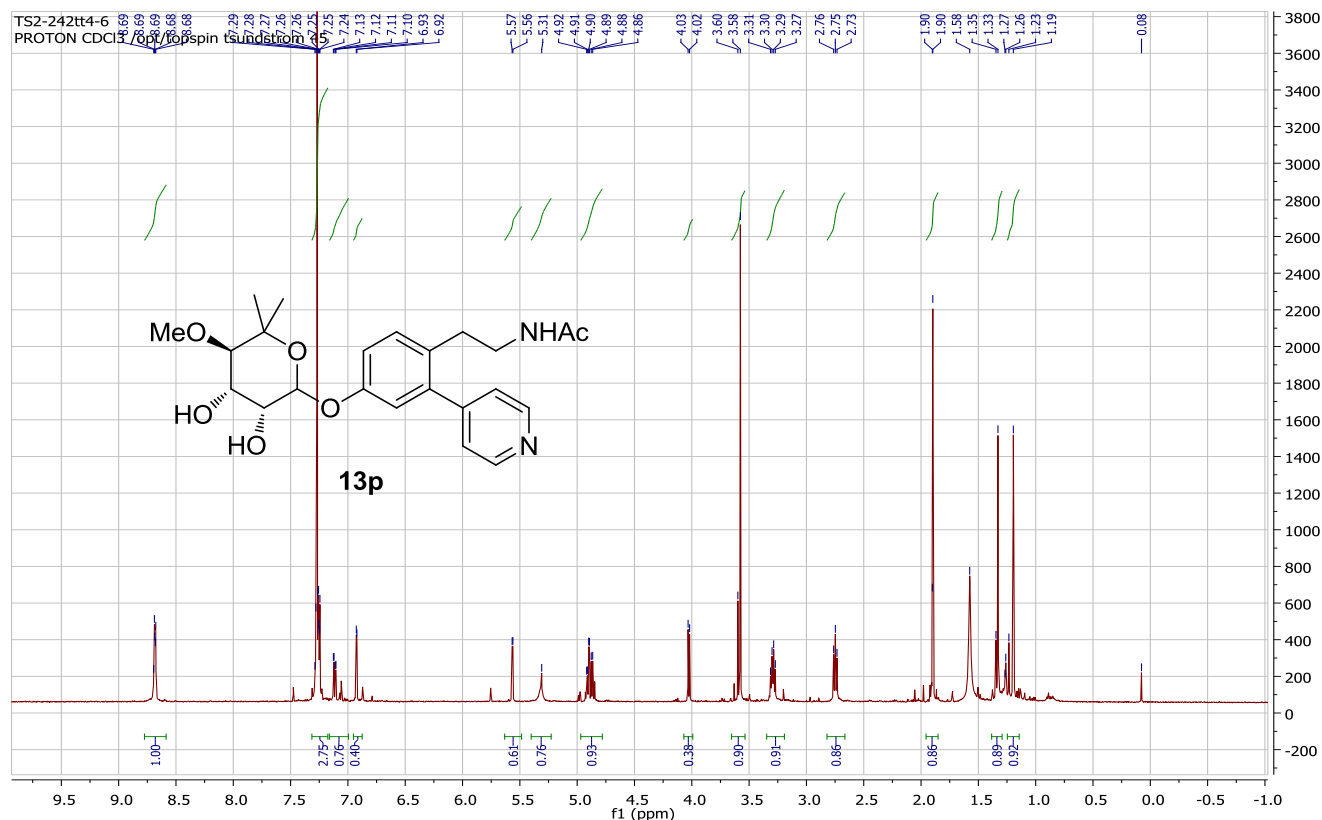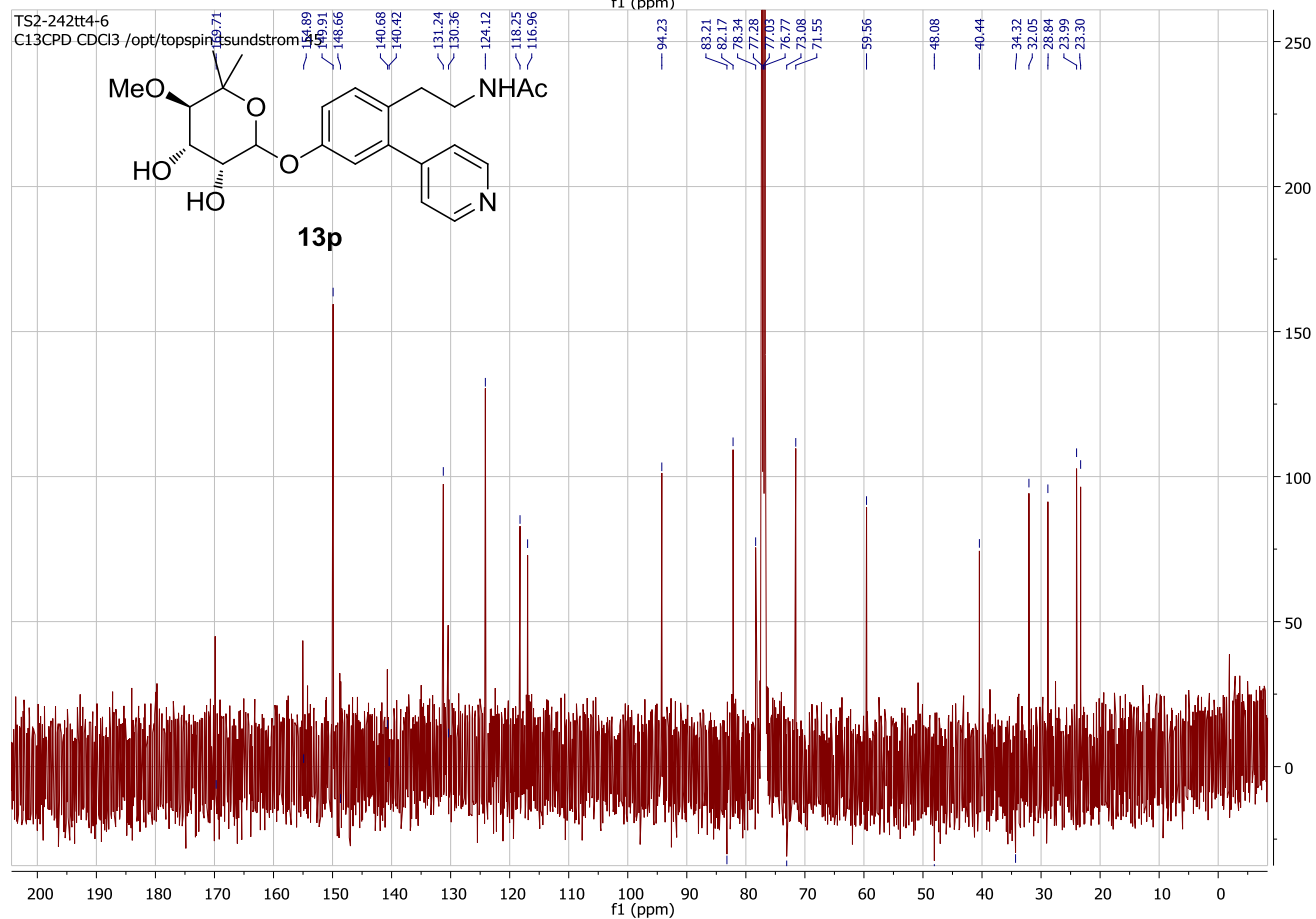

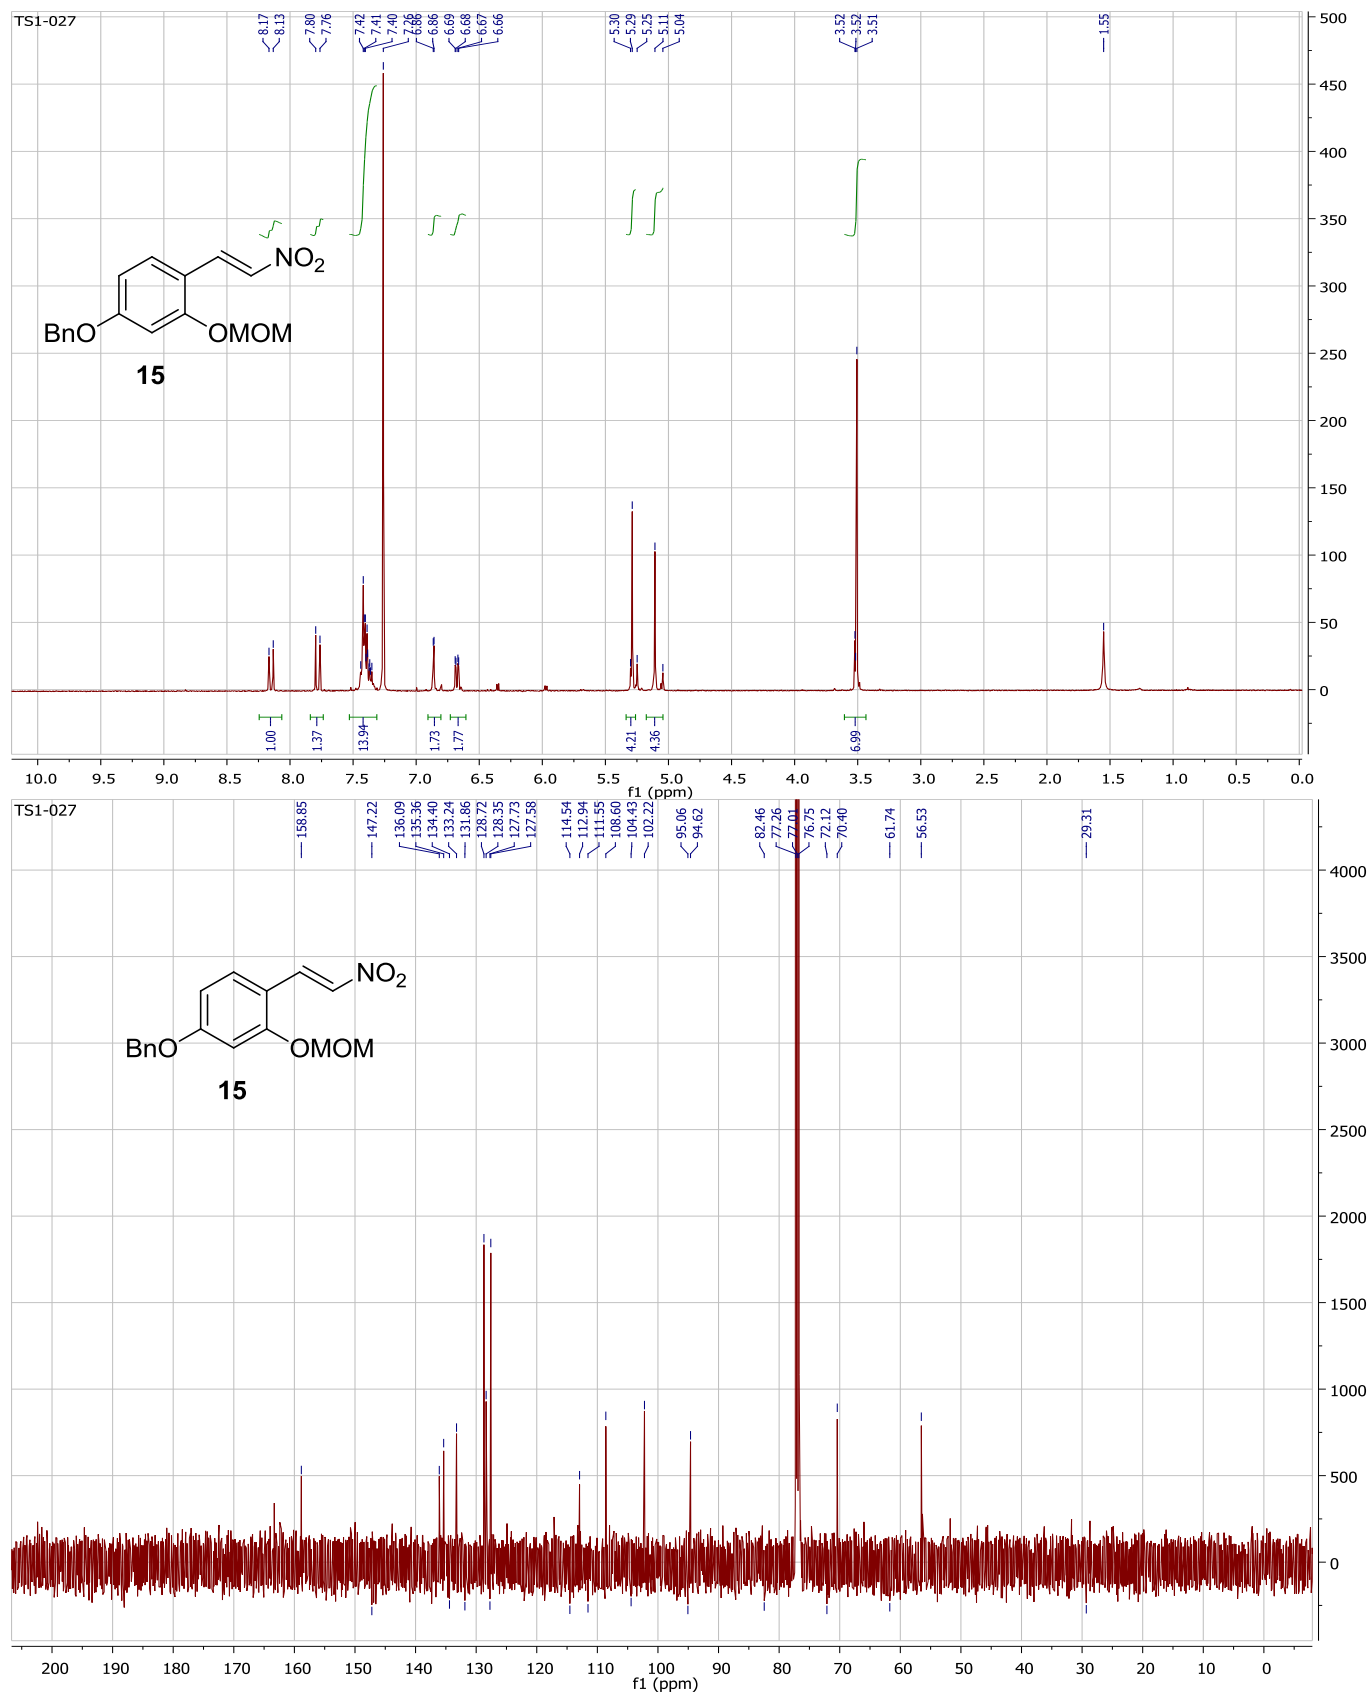

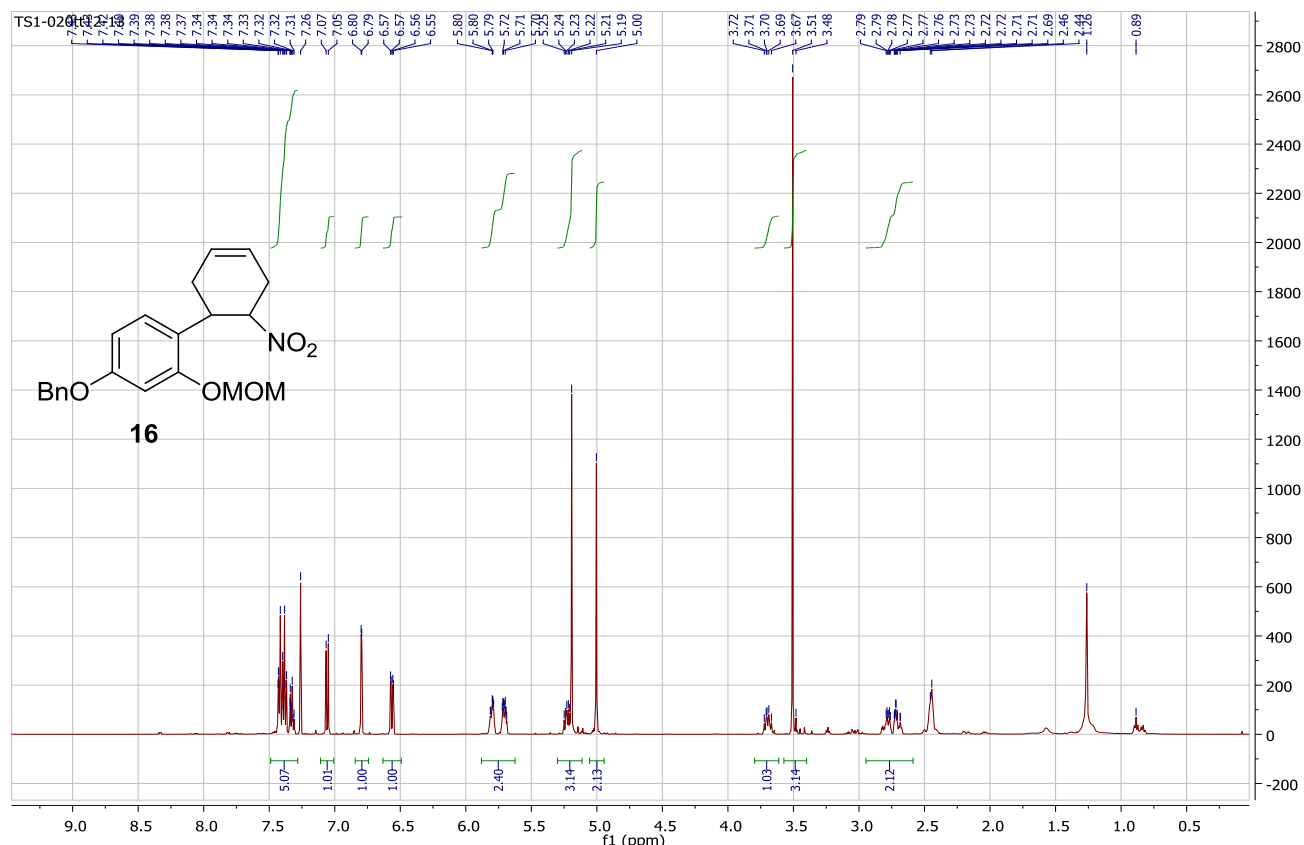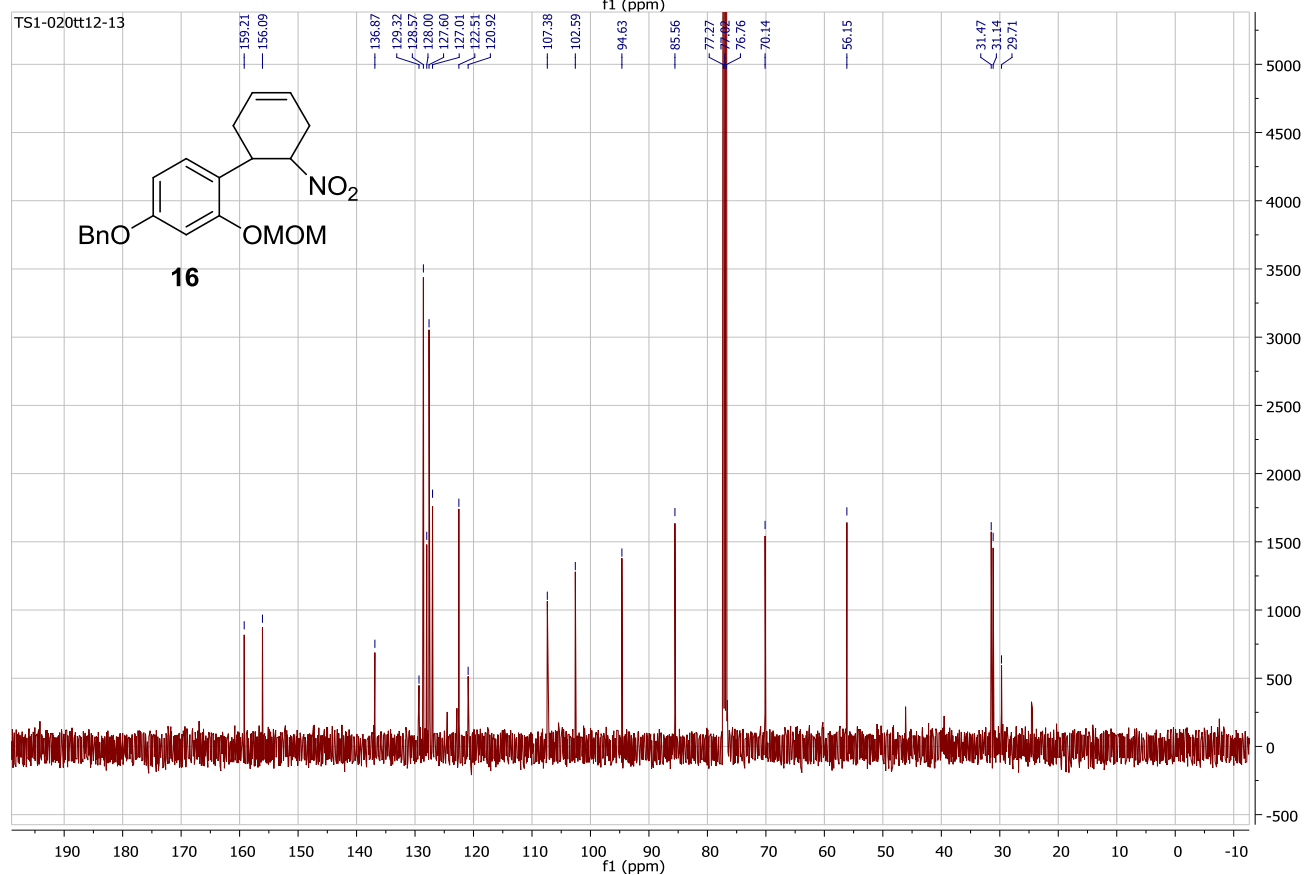

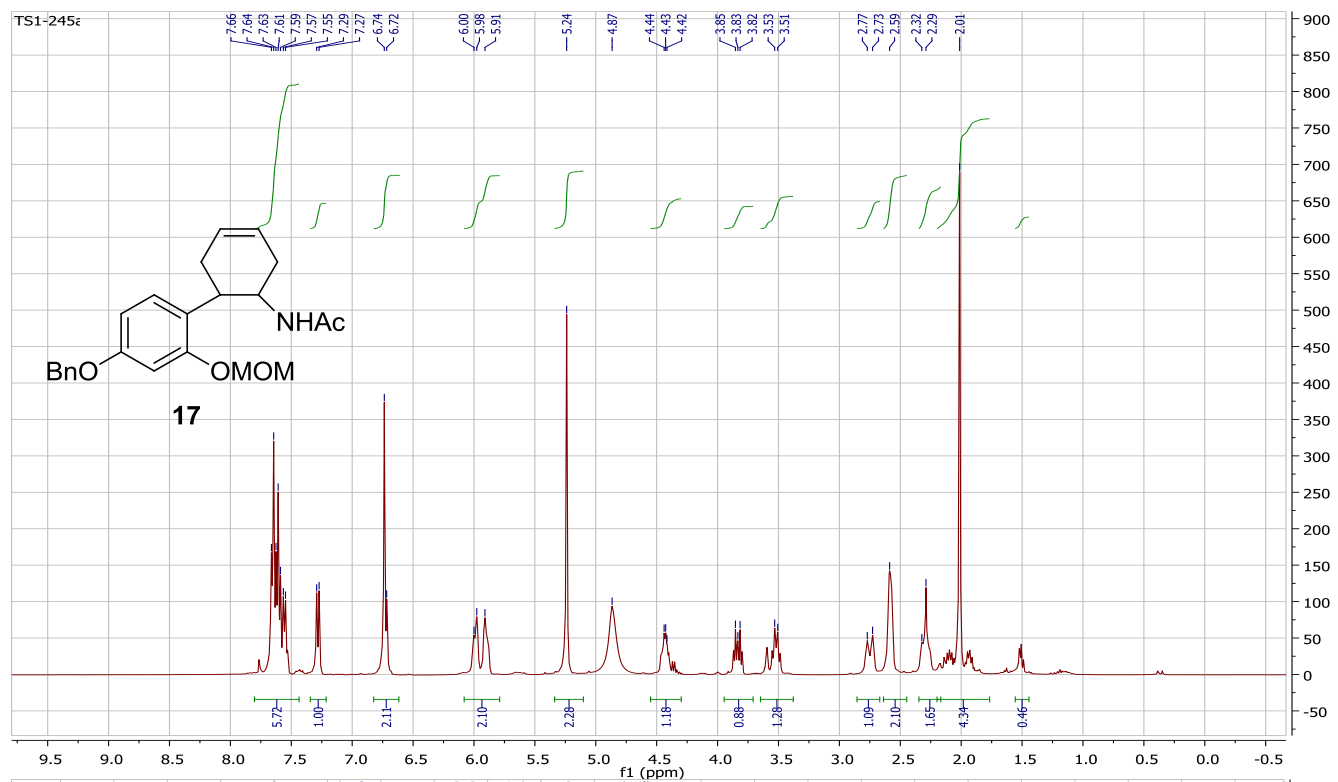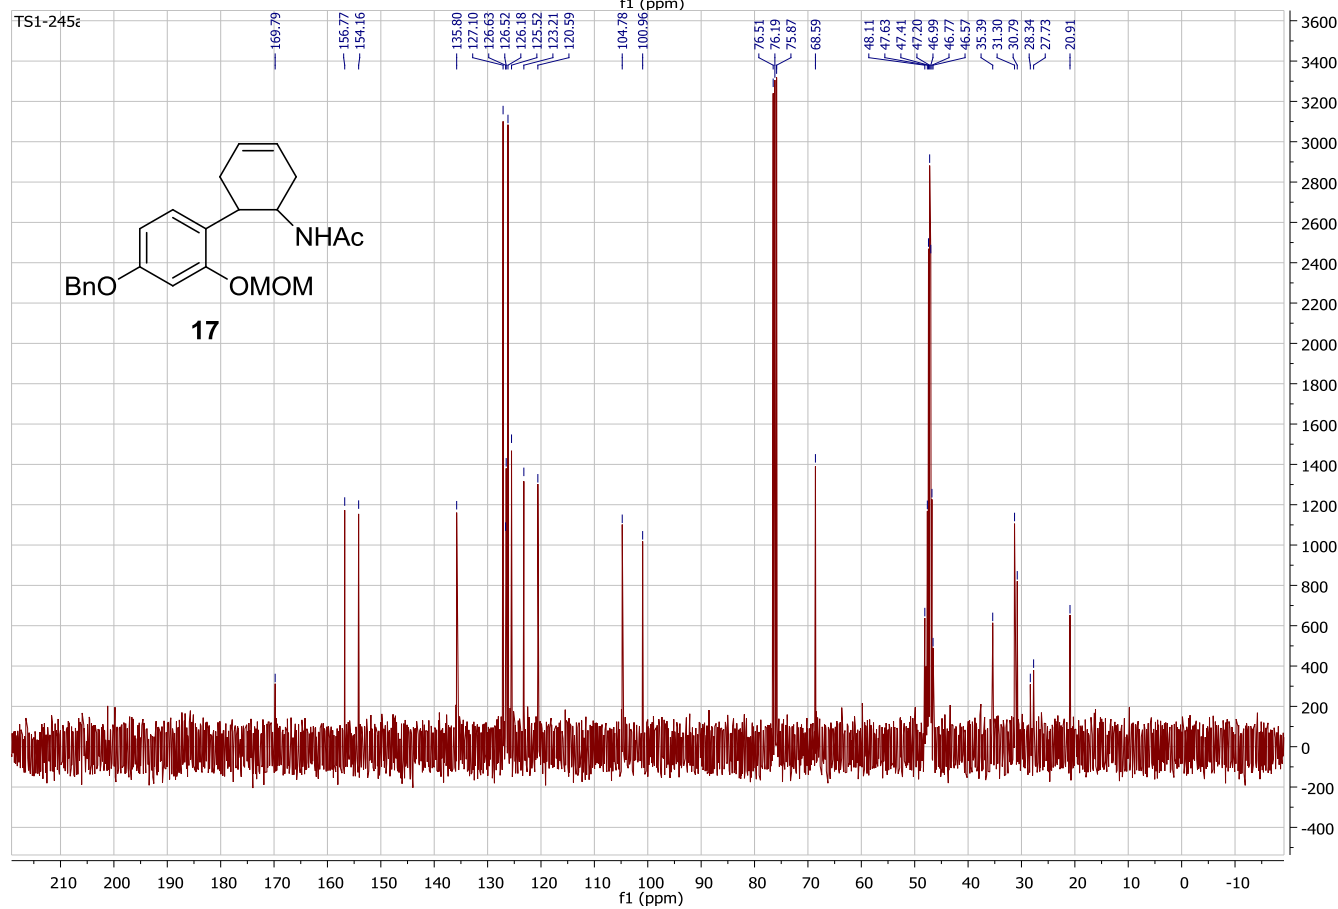



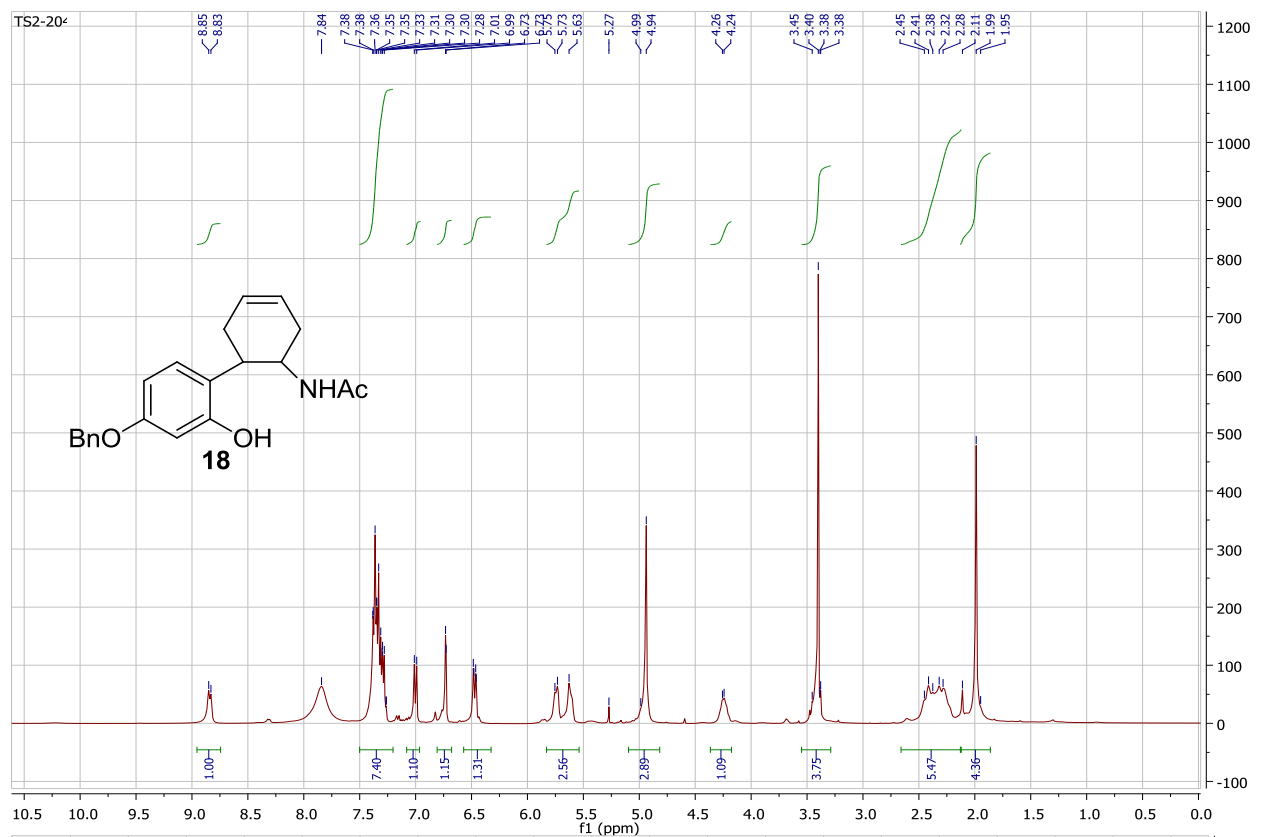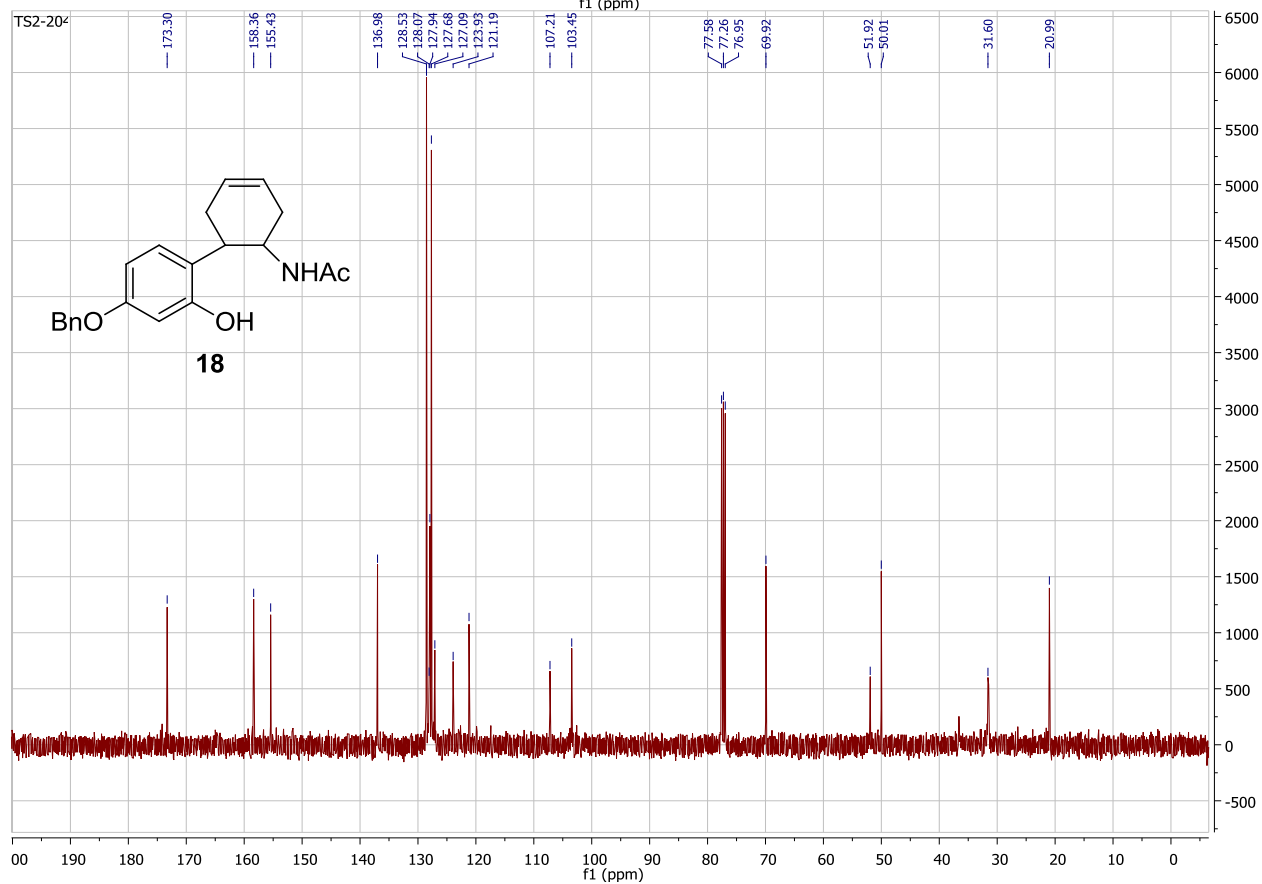

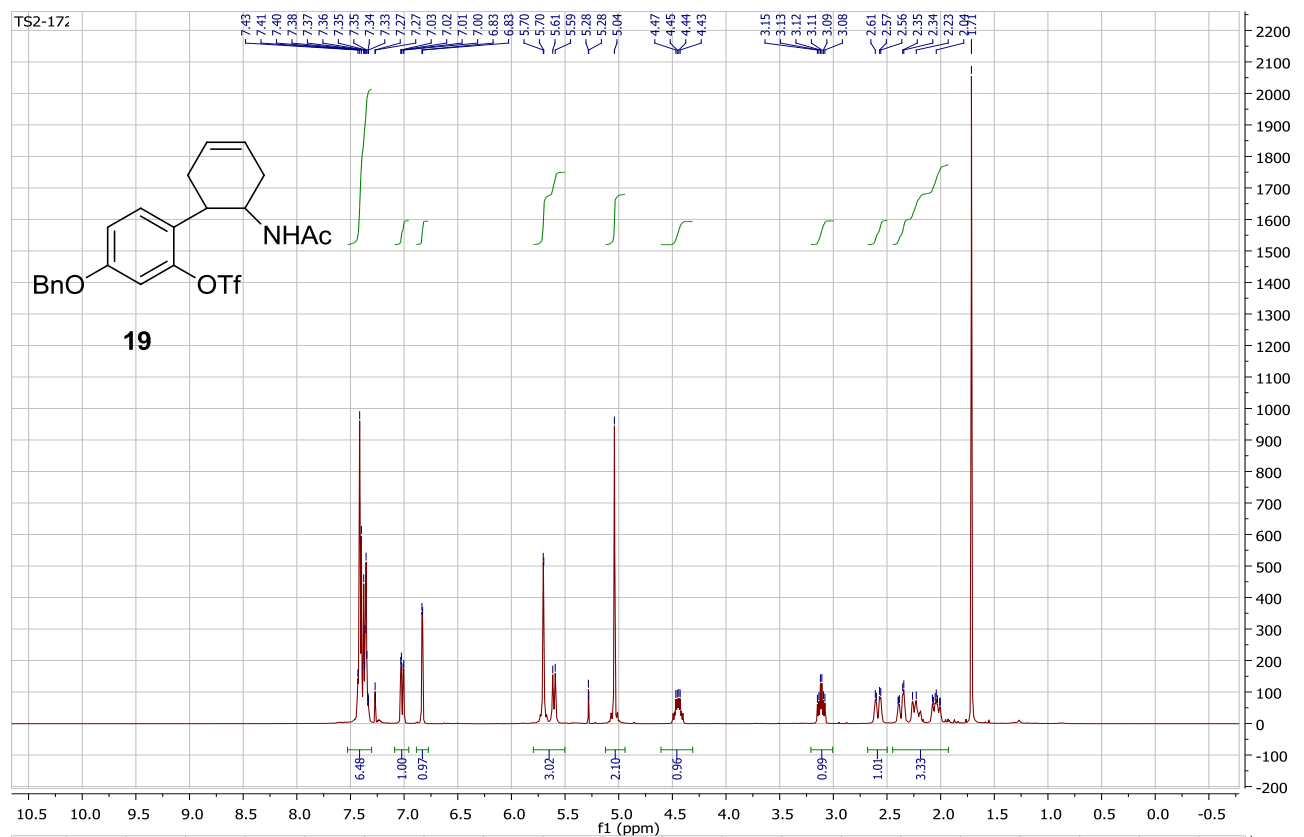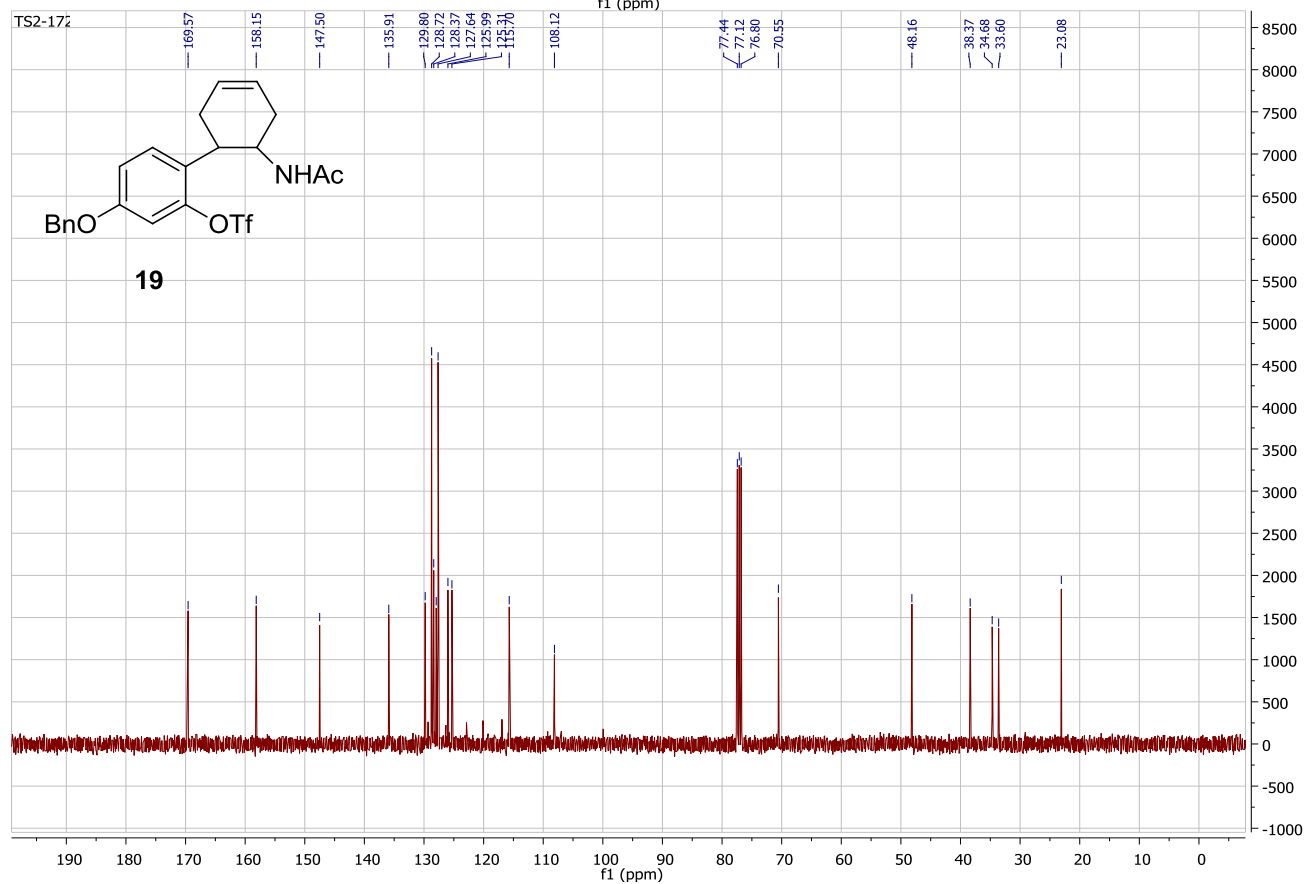

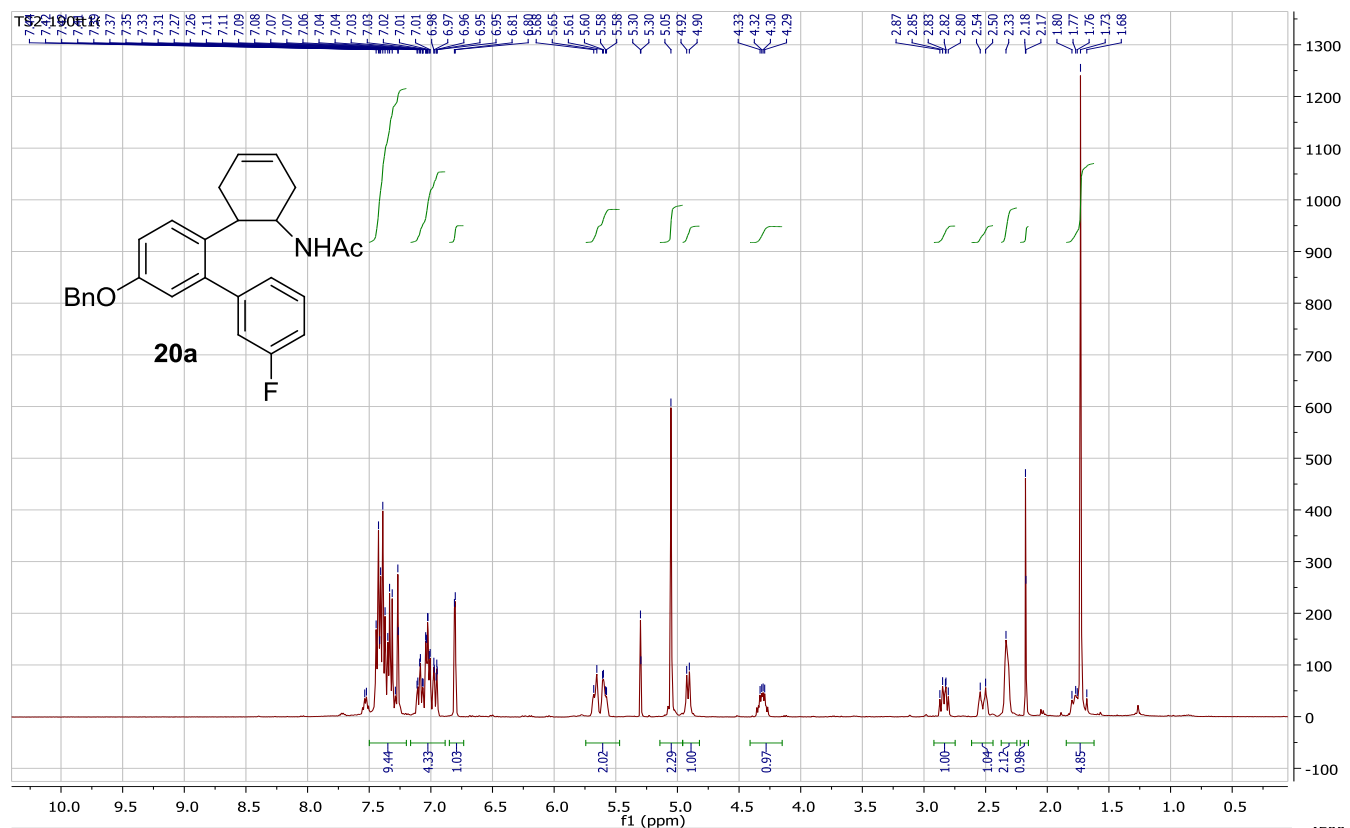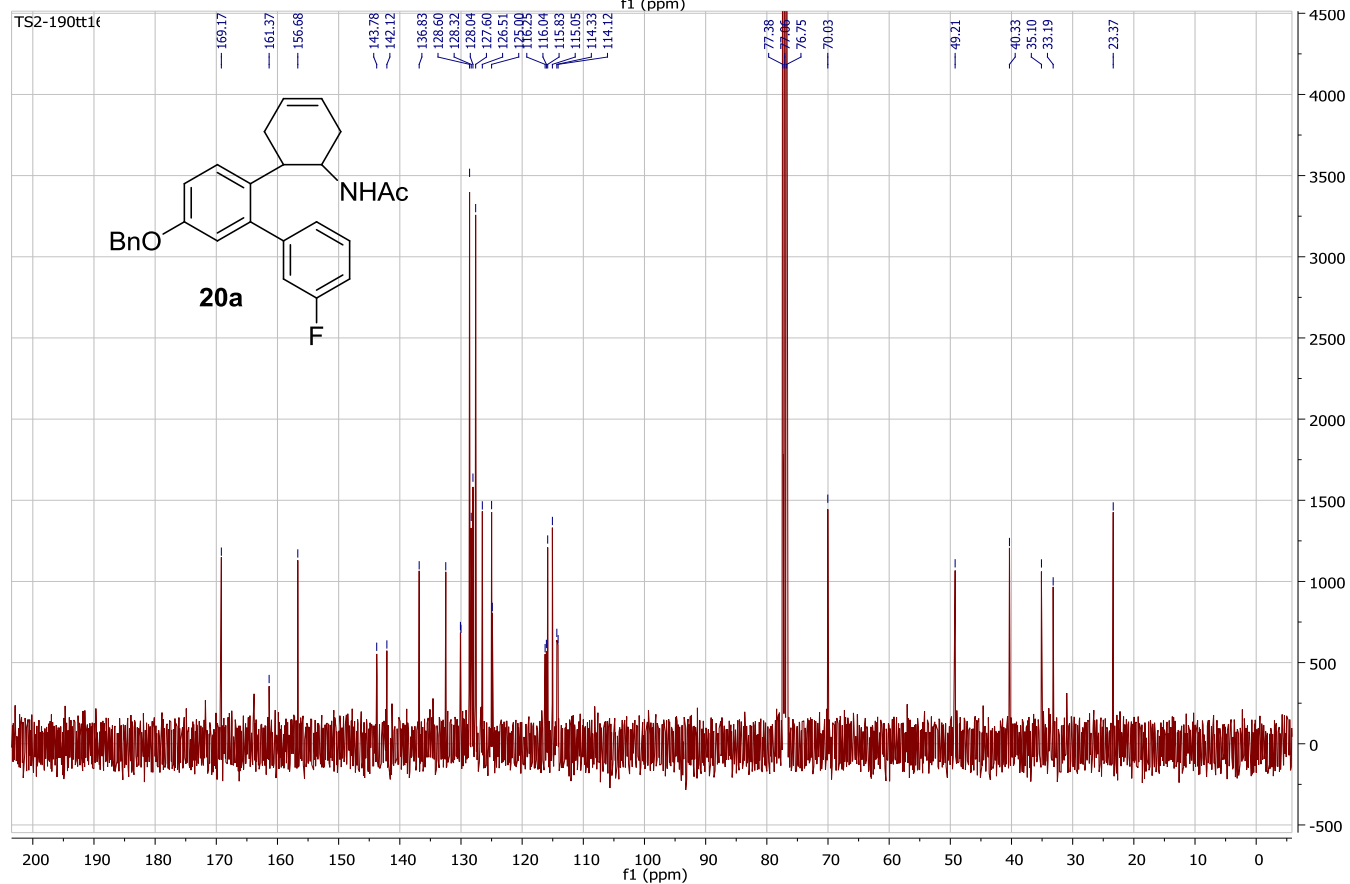

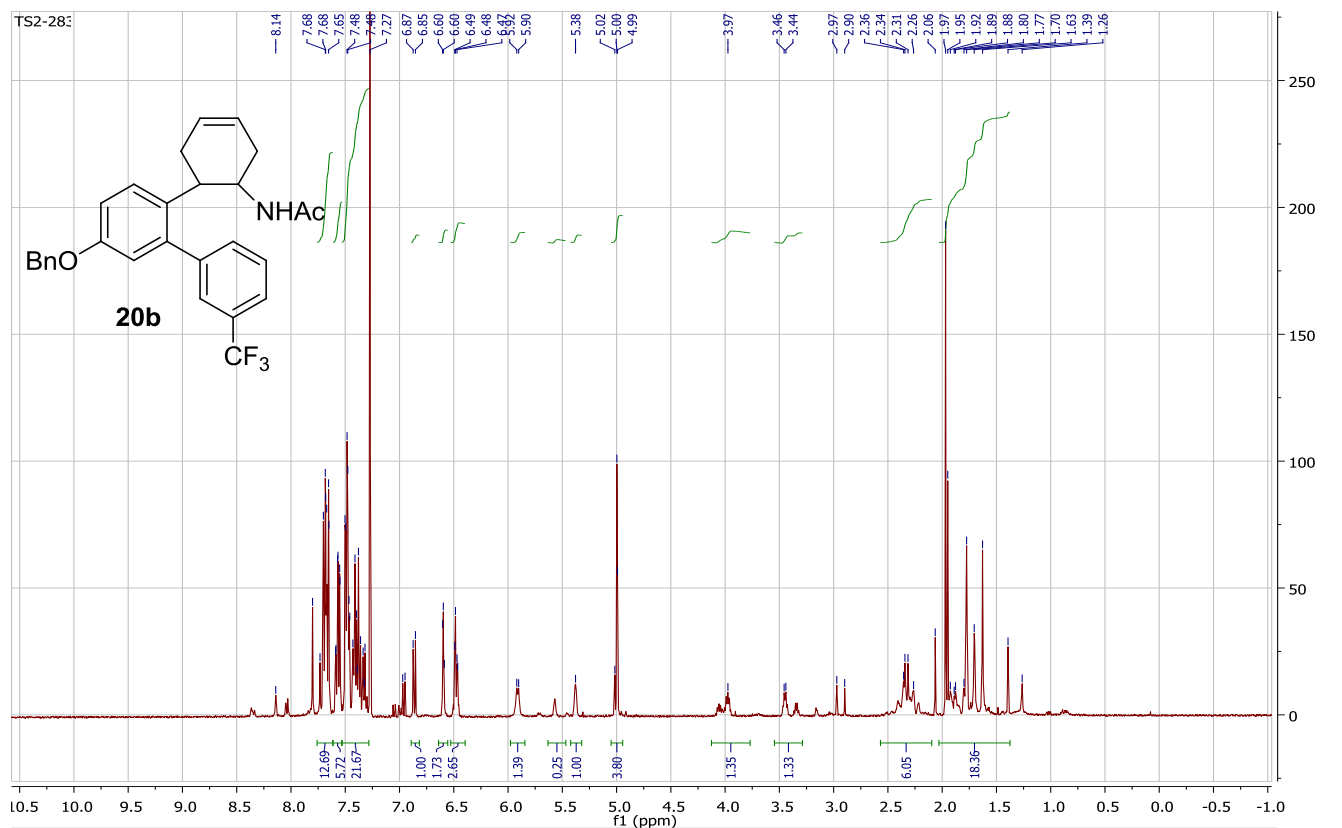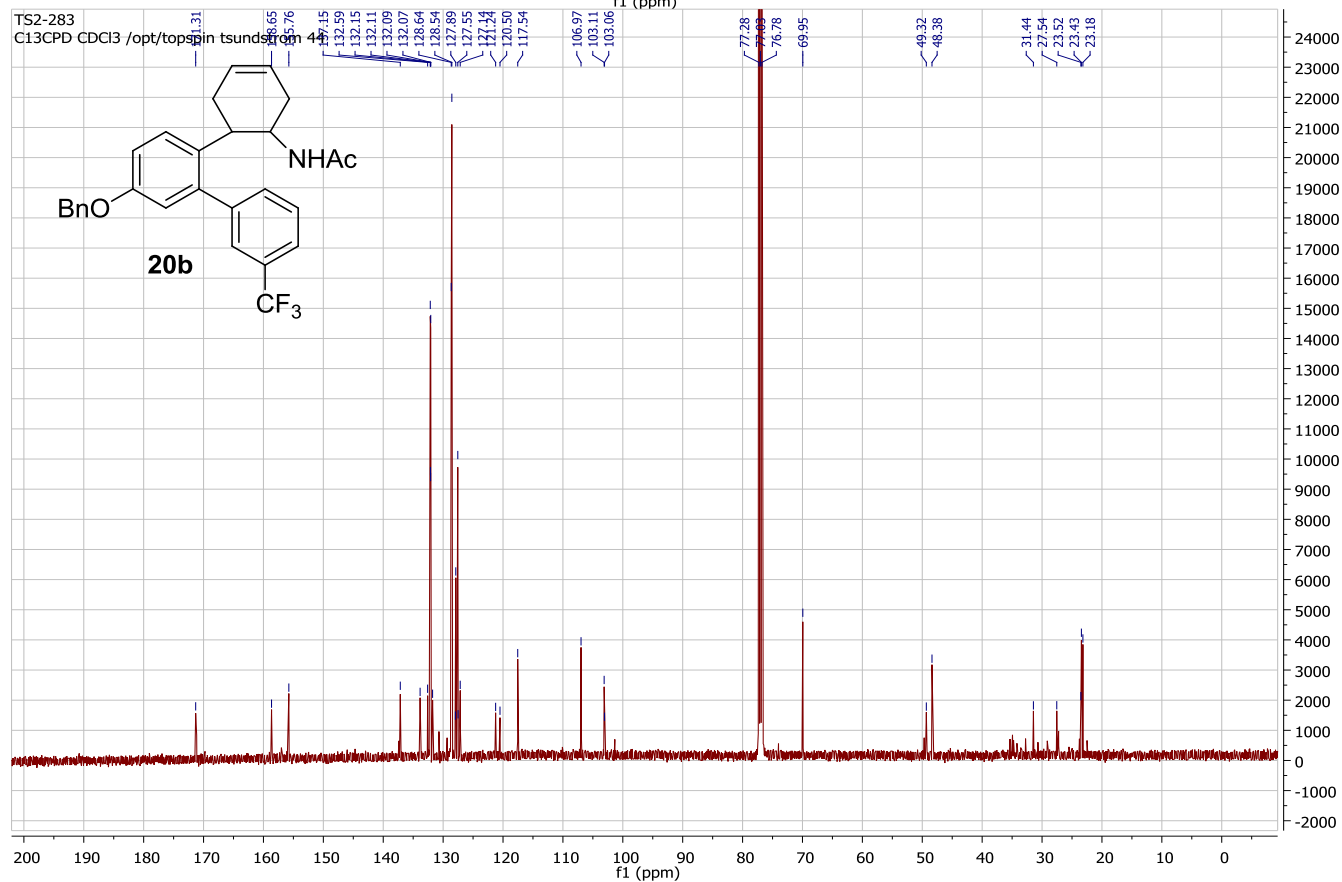

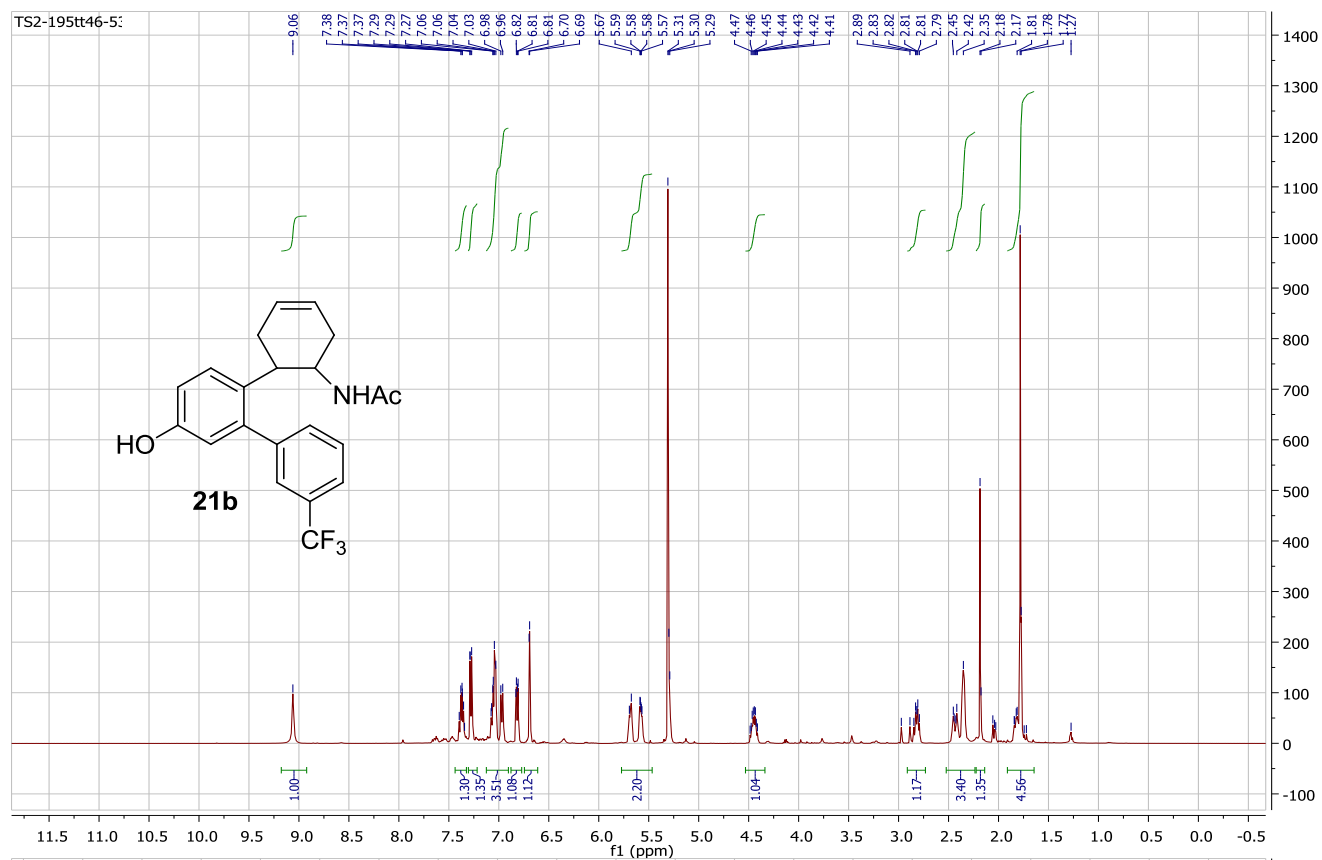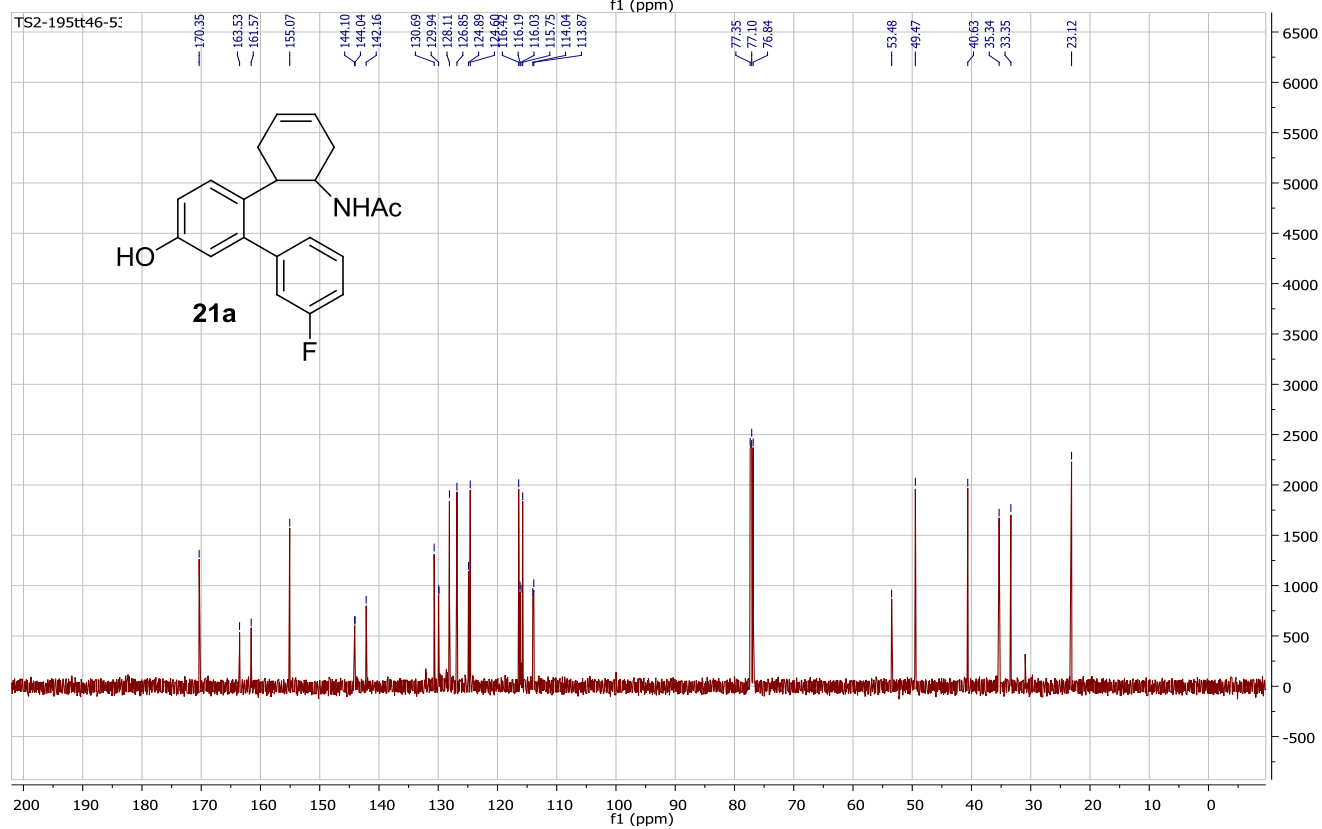

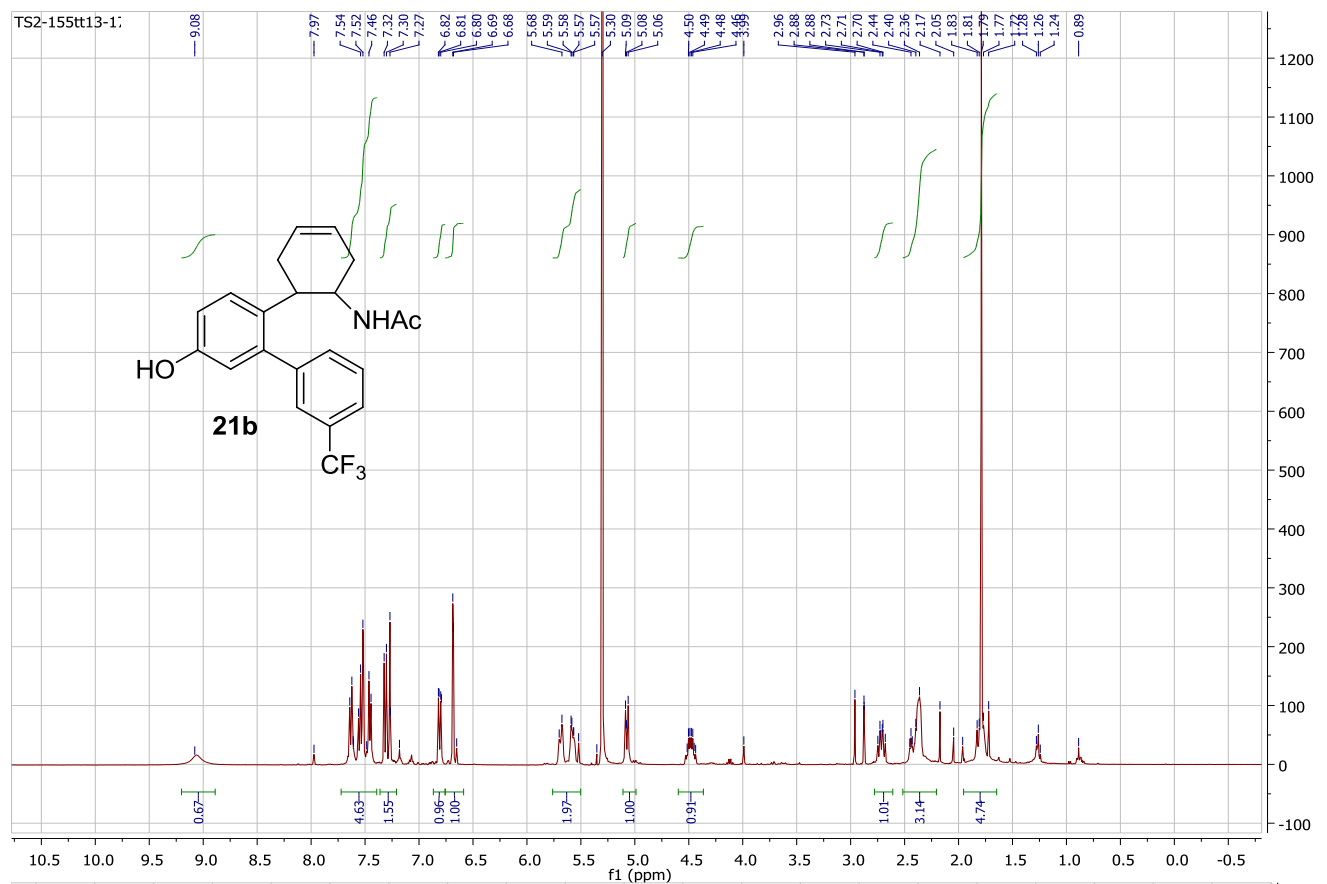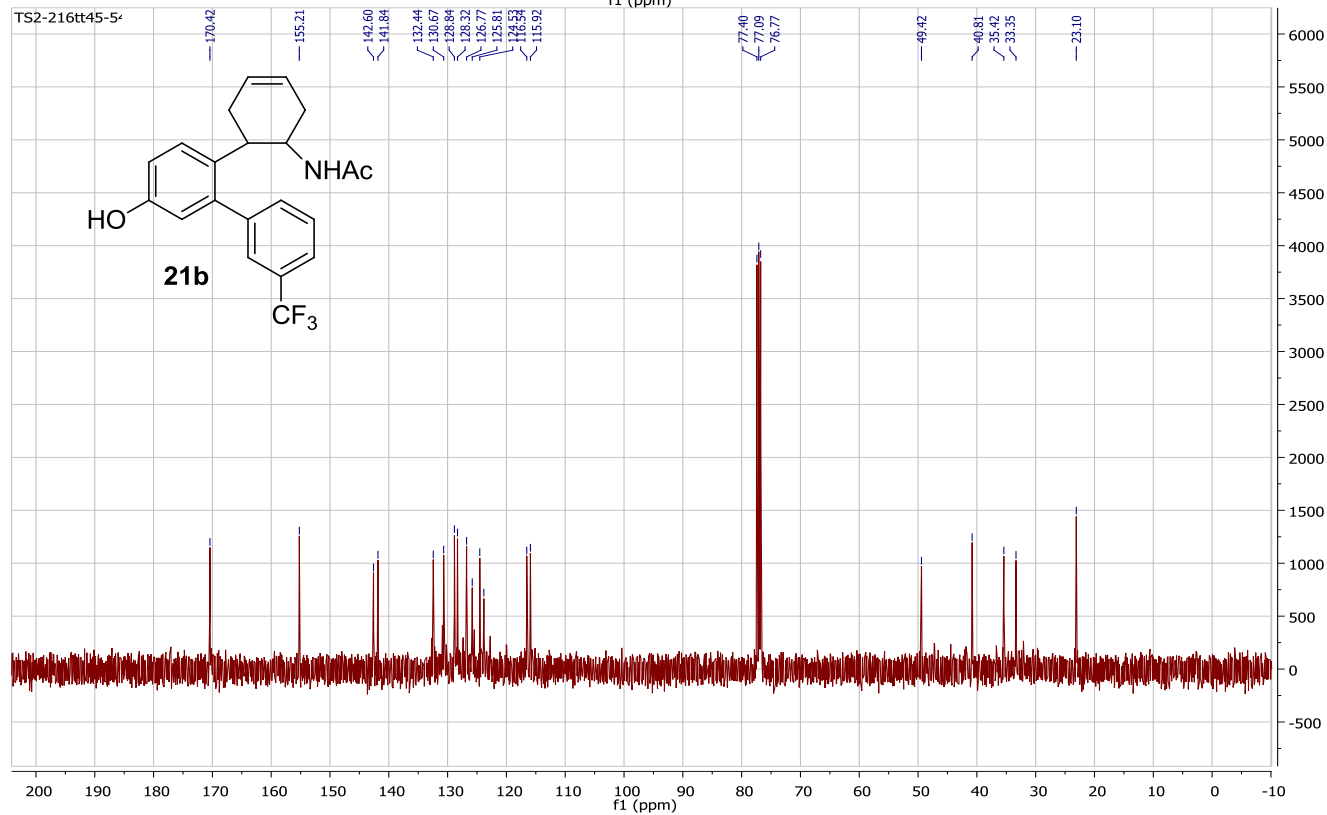

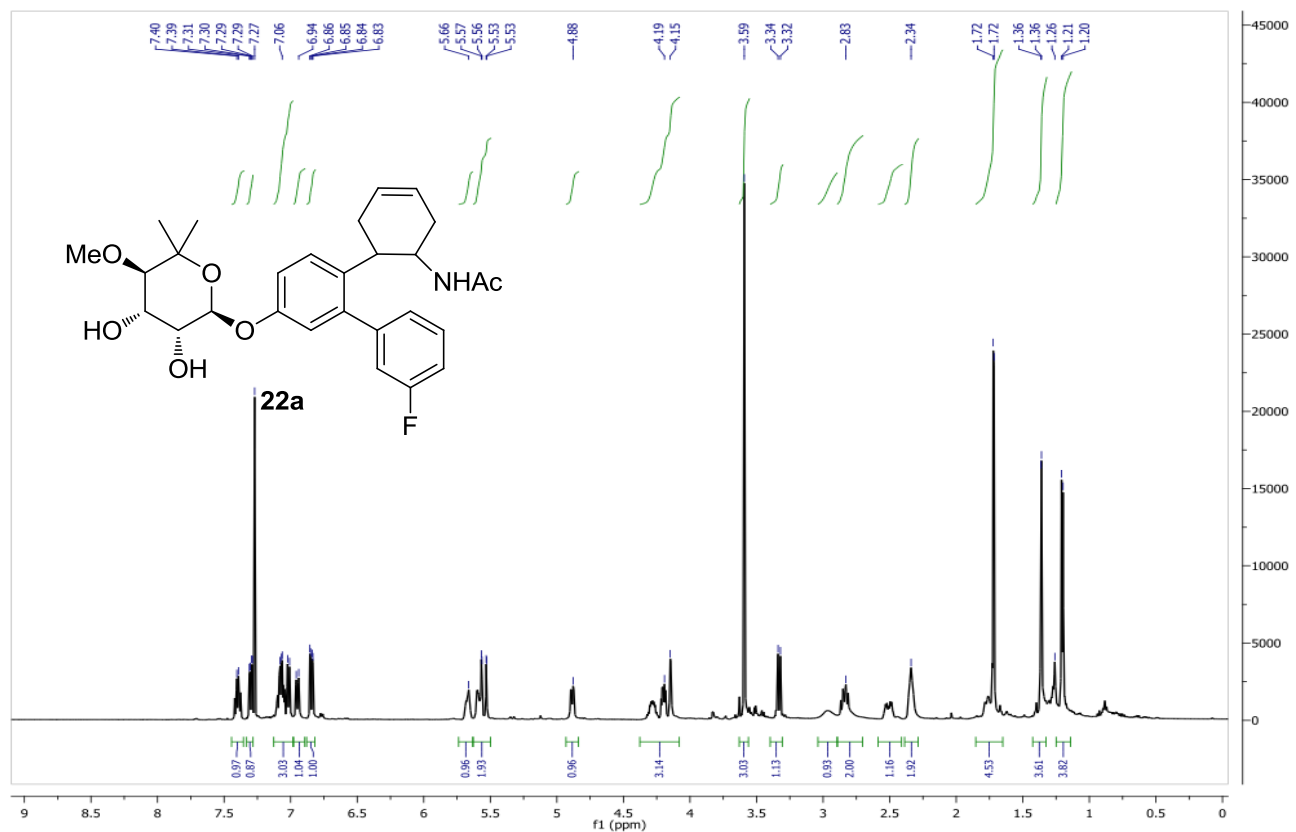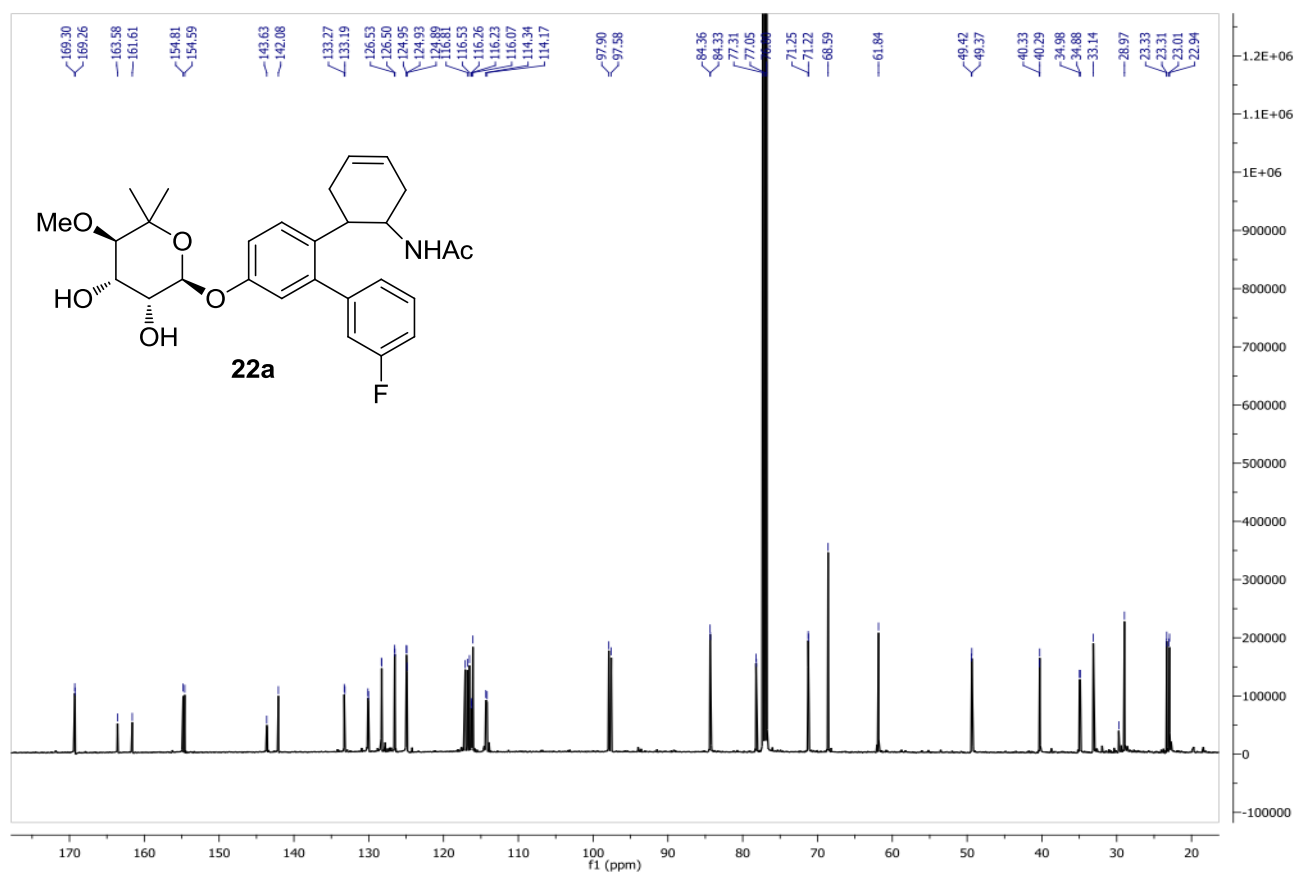

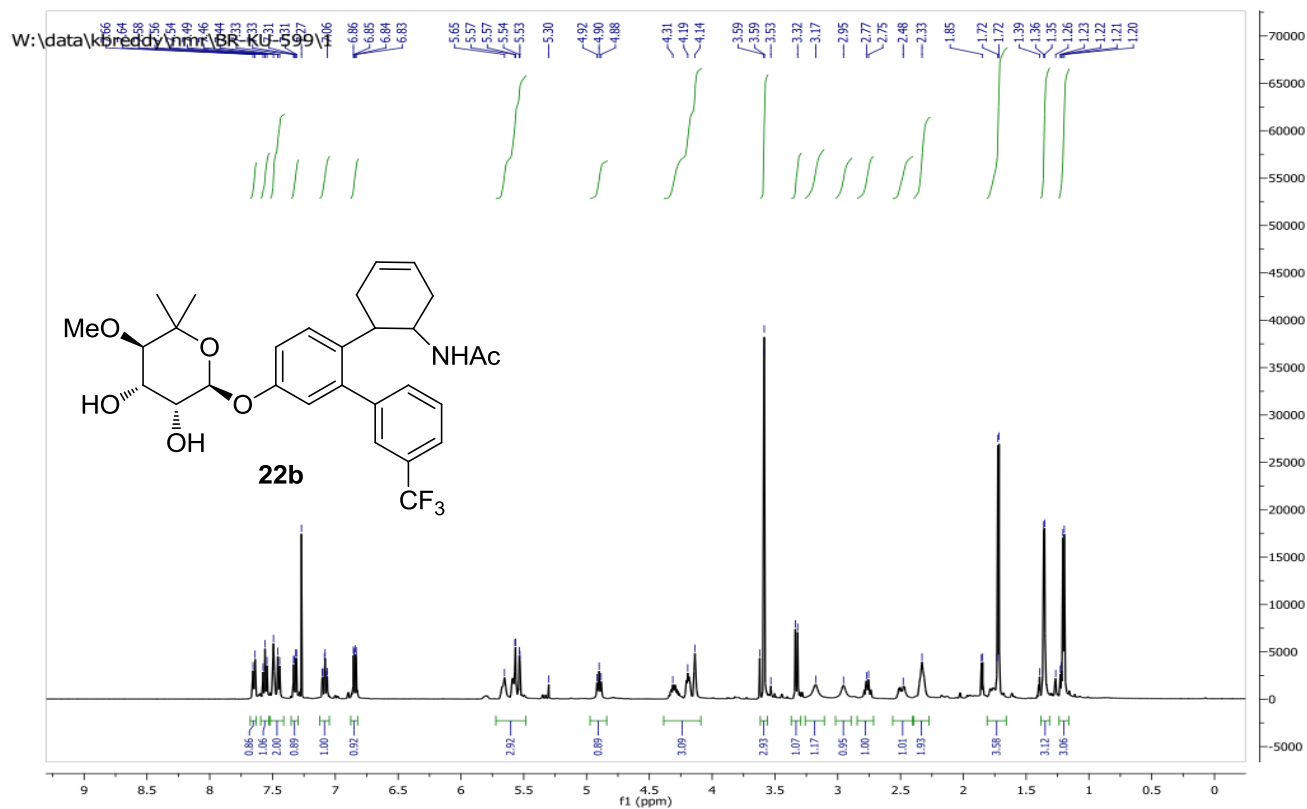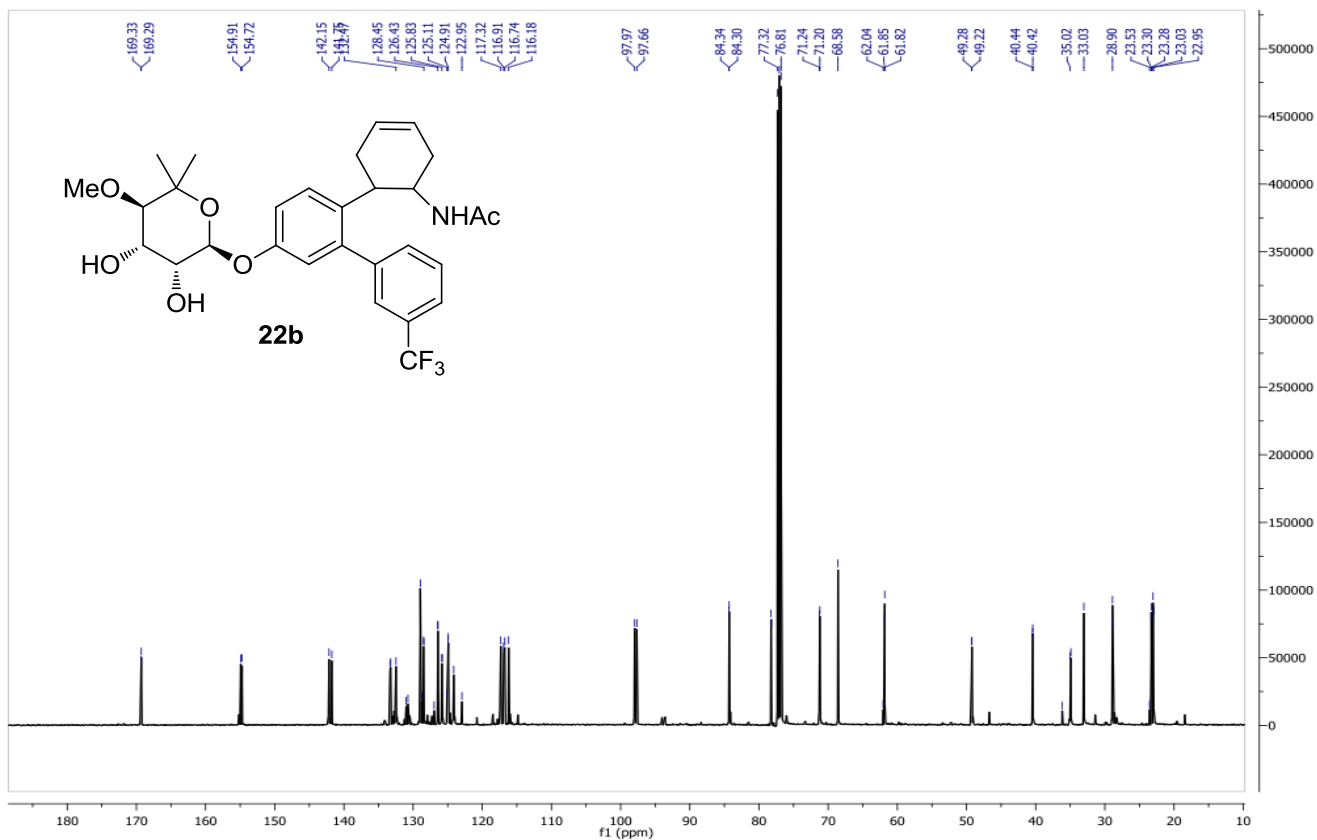



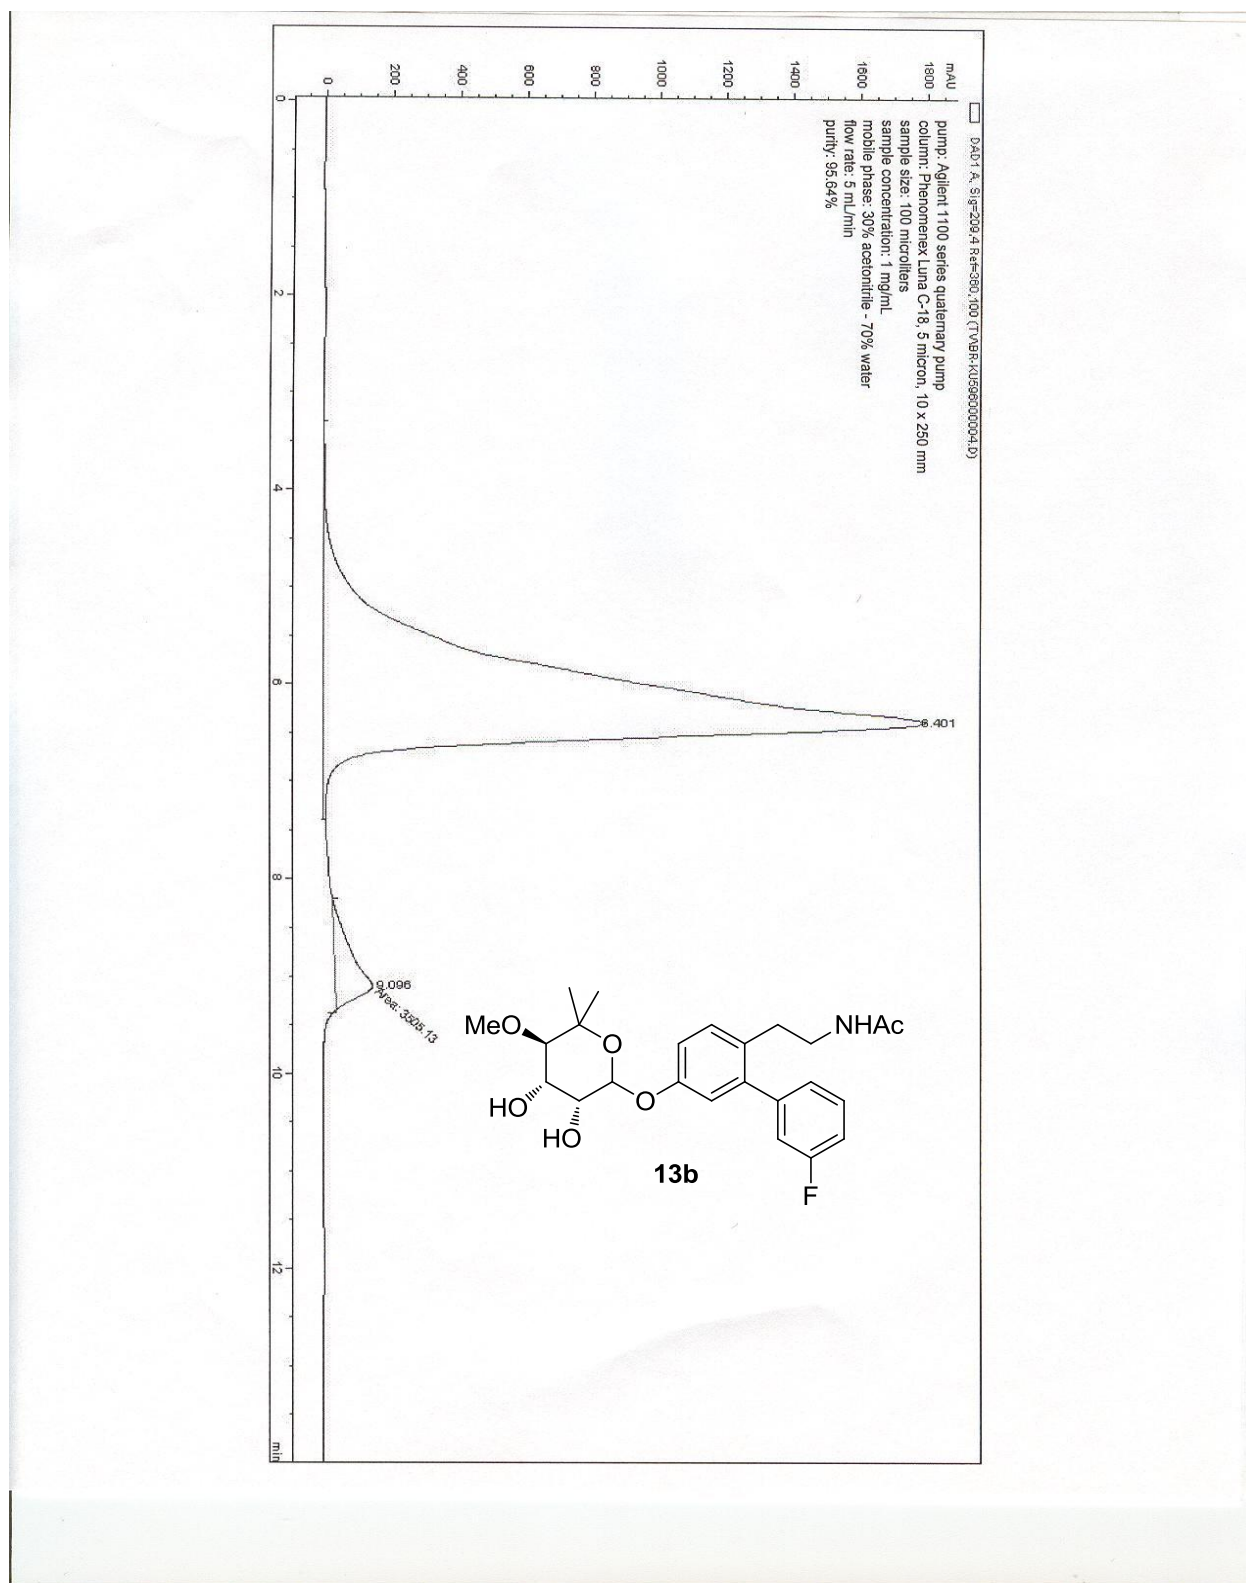

Analytical reverse-phase HPLC profile of compound **13b** prior to bioassay. Retention time = 6.401 min. Purity ~ 95%. Absorbance wavelength = 214 nm.

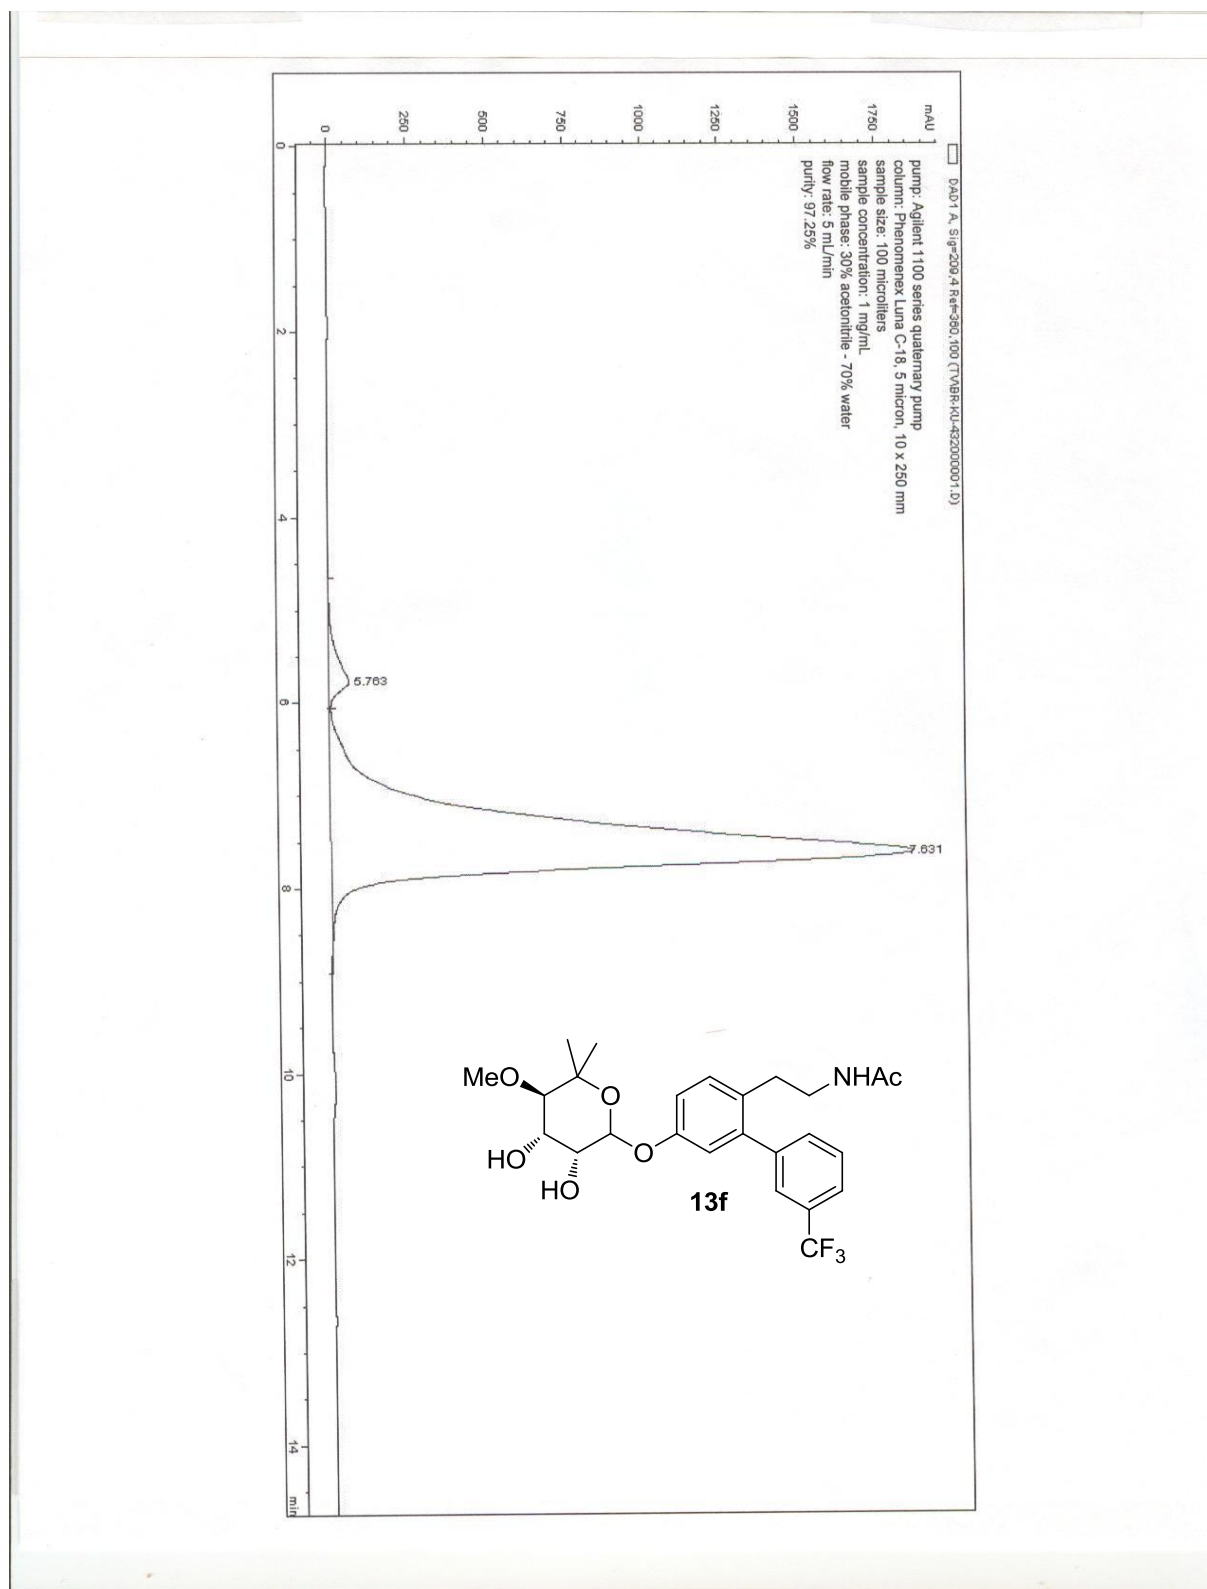

Analytical reverse-phase HPLC profile of compound **13f** prior to bioassay. Retention time = 7.631 min. Purity ~ 97%. Absorbance wavelength = 214 nm.

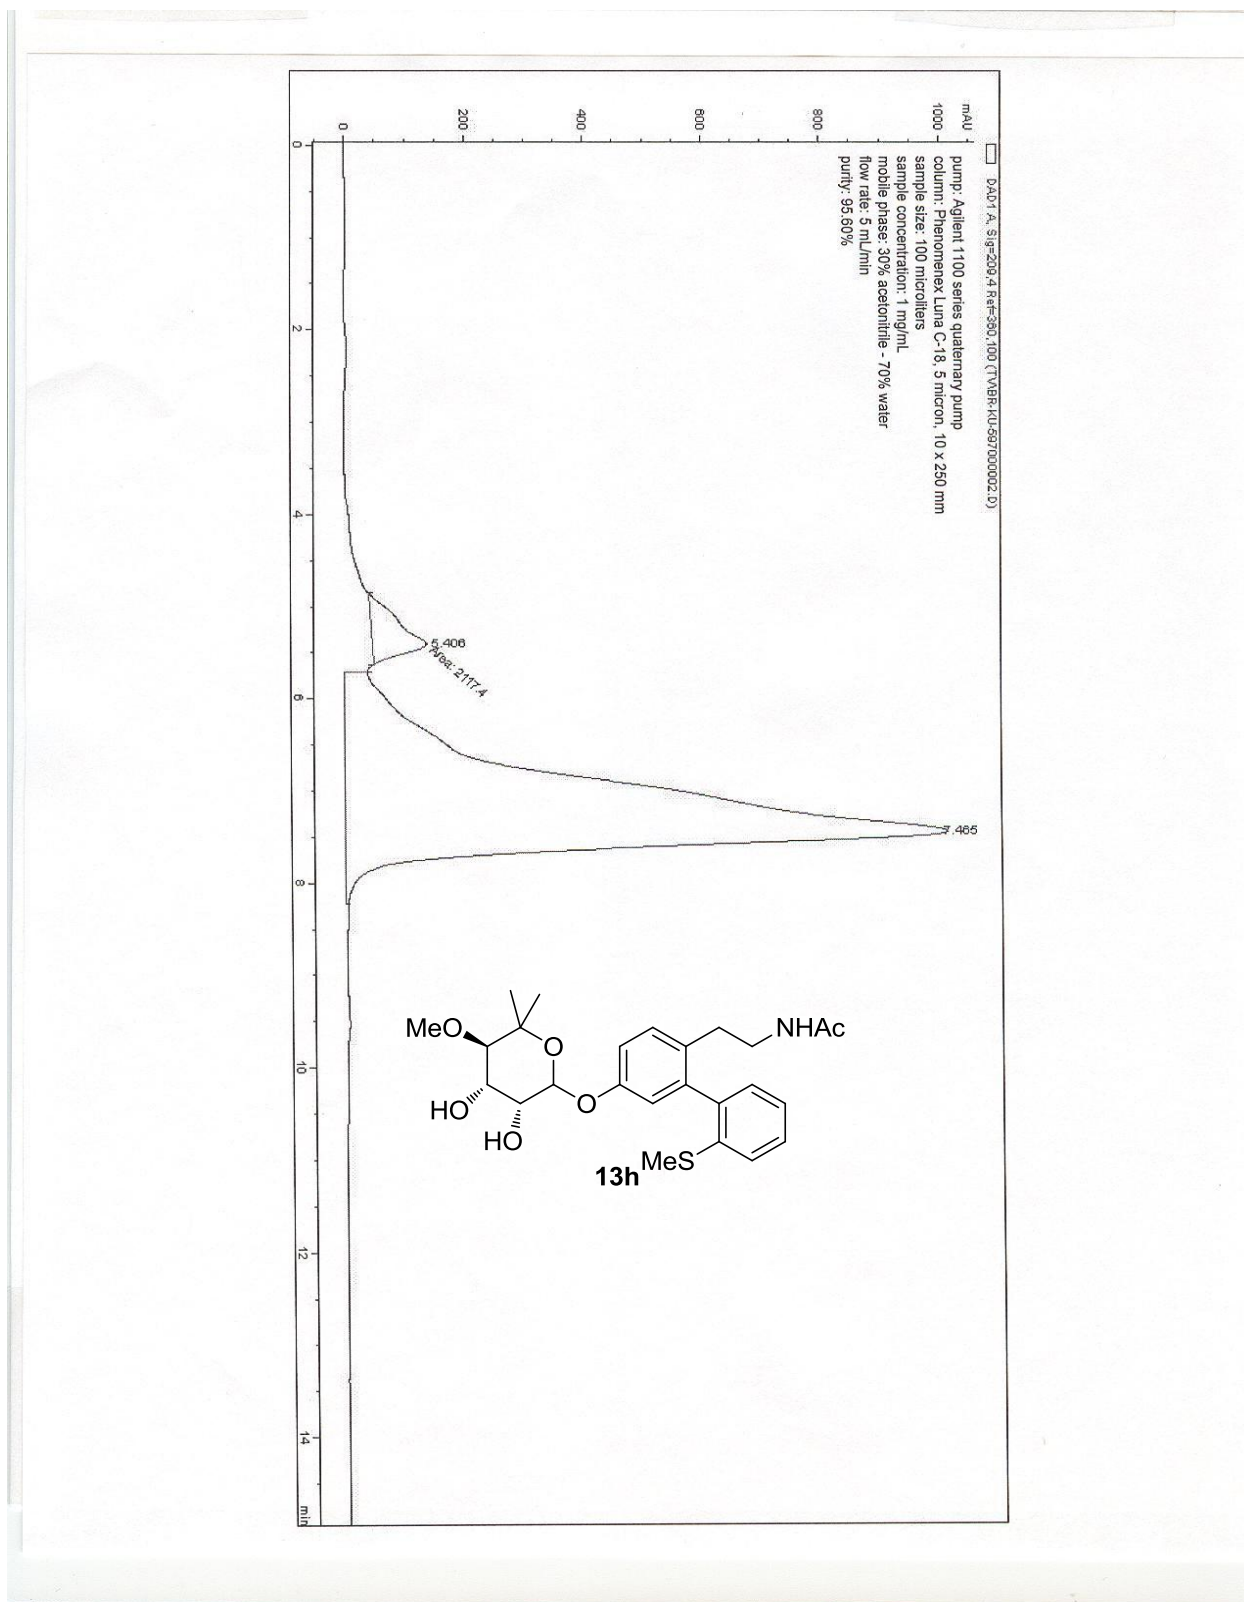

Analytical reverse-phase HPLC profile of compound **13h** prior to bioassay. Retention time = 7.465 min. Purity ~ 95%. Absorbance wavelength = 214 nm.

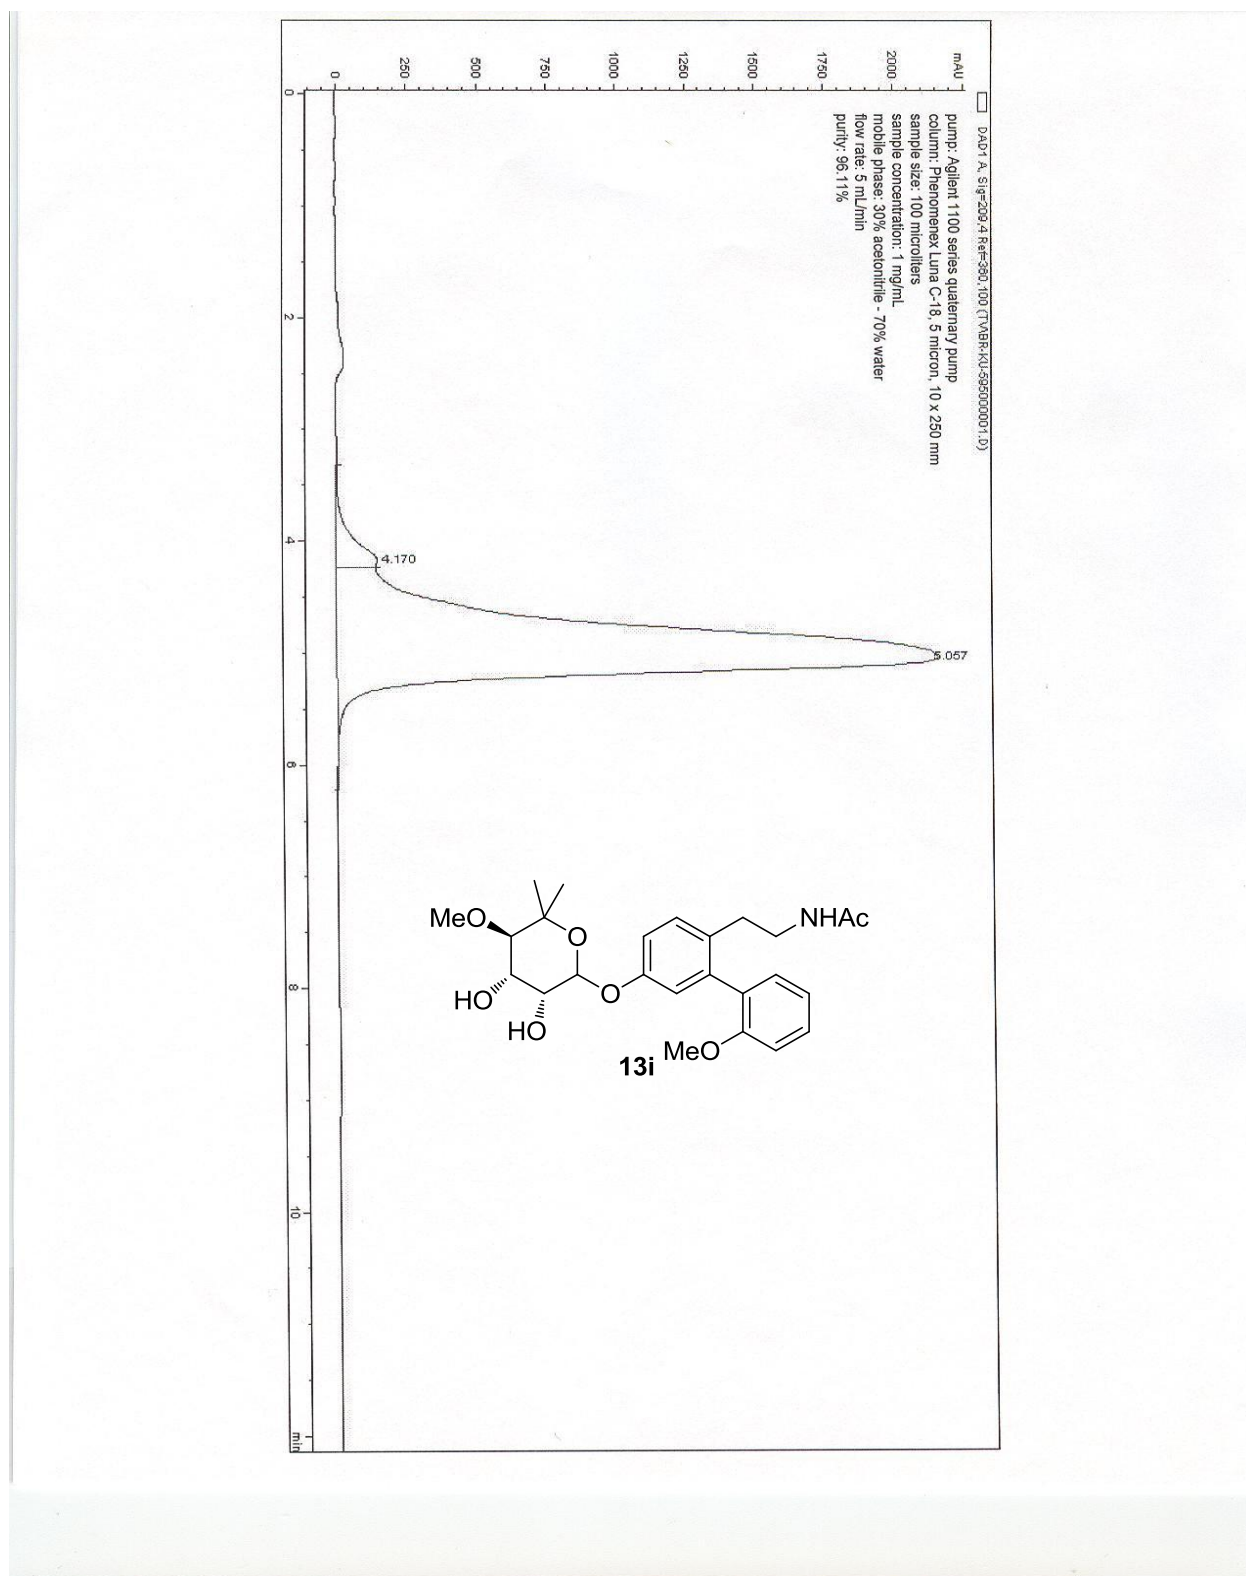

Analytical reverse-phase HPLC profile of compound **13i** prior to bioassay. Retention time = 5.057 min. Purity ~ 96%. Absorbance wavelength = 214 nm.

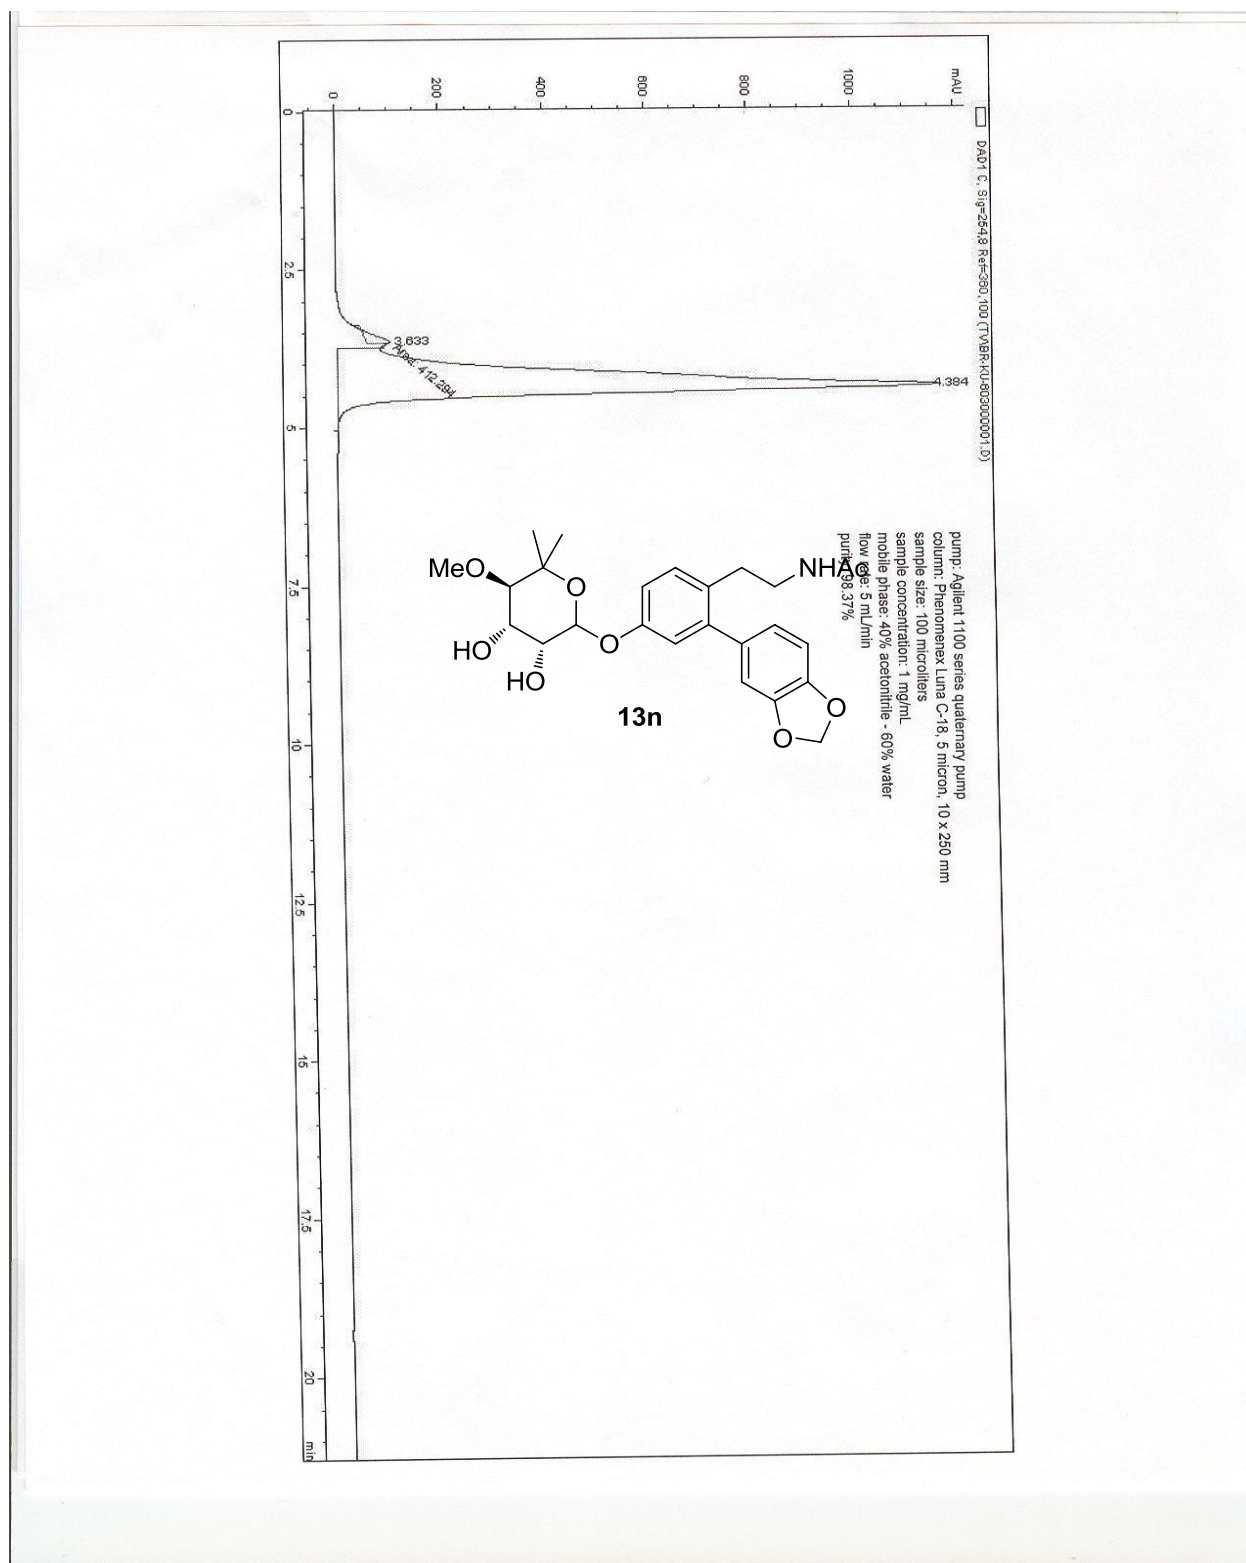

Analytical reverse-phase HPLC profile of compound **13n** prior to bioassay. Retention time = 4.384 min. Purity ~ 98%. Absorbance wavelength = 214 nm.
